# Supplementary material for: Promoterless Transposon Mutagenesis Drives Solid Cancers via Tumor Suppressor Inactivation
Source: Cancers (Basel). 2021 Jan 9;13(2):225. doi: 10.3390/cancers13020225 (PMC7827284; doi:10.3390/cancers13020225)
Supplement: Supplementary file 1 [file cancers-13-00225-s001.zip › cancers-1051638-supple-table.xlsx]

## Sheet: Key
Supplementary Tables S1–S24 for manuscript "Promoterless Transposon Mutagenesis Drives Solid Cancers via Tumor Suppressor Inactivation." 2020. Aziz Aiderus, Ana M. Contreras-Sandoval, Amanda L. Meshey, Justin Y. Newberg, Jerrold M. Ward, Neal G. Copeland, Nancy A. Jenkins, Karen M. Mann, and Michael B. Mann.
Correspondence to K.M.M. at Karen.Mann@moffitt.org and M.B.M. at Michael.Mann@moffitt.org
Supplementary Tables
Tab name	Tab Description
ST1	Tumor incidence and subgroup classifications by cohort groups
ST2	Sequencing projects summary by cohort
ST3	Specimen metafile data for projects sequenced using SBCapSeq protocol with Ion Torrent Proton sequencer
ST4	BED file of SB insertions for Skin-Onc2.3_SBC cohort
ST5	BED file of SB insertions for Lung-Onc2.3_SBC cohort
ST6	BED file of SB insertions for Lung-Onc3_SBC cohort
ST7	Specimen metafile data for projects sequenced using Splink_PCR protocol with 454 GS-FLX Titanium pyrosequencer
ST8	BED file of SB insertions for Lung29_454
ST9	SB Driver Analysis with discovery (FDR_hit = TRUE) and progression (FWER_hit = TRUE) for the Lung-Onc3_454 dataset (n=29)
ST10	BED file of SB insertions for HCA95_454
ST11	SB Driver Analysis with discovery (FDR_hit = TRUE) and progression (FWER_hit = TRUE) for the HAC-Onc3_454 dataset (n=95)
ST12	Trunk SB Driver Analysis with discovery (FDR_hit = TRUE) and progression (FWER_hit = TRUE) for the HAC-Onc3_454 dataset (n=95)
ST13	BED file of SB insertions for Liver-Onc2.3_SBC cohort
ST14	BED file of SB insertions for Other-Onc2.3_SBC cohort
ST15	BED file of SB insertions for Ovary-Onc2.3_SBC cohort
ST16	BED file of SB insertions for Onc2.3-Pan-Tumor-SBC27 cohort
ST17	Discovery and progression SB Driver Analysis for Onc2.3-Pan-Tumor-SBC27 cohort
ST18	Trunk SB Driver Analysis for Onc2.3-Pan-Tumor-SBC27. (Note: Six trunk drivers — Aox2, Crlf3, Dgkd, Fgfr2, Ilf3, and Zfp292 — were manually removed from the dataset because supporting evidence from three related lung masses from a single animal provided insufficient evidence for tumor recurrence.)
ST19	Discovery and progression SB Driver Analysis for SB|Lung combined Onc2.3 and Onc3 cohorts
ST20	COSMIC v91 Cancer Gene Census TSG enrichment with SB-Onc2.3 Pan-tumor drivers
ST21	TSGdb enrichment with SB-Onc2.3 Pan-tumor drivers
ST22	Enrichr biological pathway and process analysis with SB-Onc2.3 Pan-tumor drivers
ST23	Literature References summarizing studies that provide in vivo evidence for validation of the TSGs identified
ST24	Rasgrf1 gene expression analysis of from SB-Onc3 Lung tumor genomes

## Sheet: ST1
		Cohort	SB-Onc2.3|Trp53+/+		Trp53+/+ controls			SB-Onc3|Trp53-KO/+		SB-Onc3|Trp53-R172H/+		SB-Onc3|Trp53+/+		Trp53-R172H/+ Controls			SB-Onc2|Trp53+/+
	Tumor classifications (↓ subtype table)		# tumors	# mice	# tumors	# mice		# tumors	# mice	# tumors	# mice	# tumors	# mice	# tumors	# mice		# tumors	# mice
	Solid tumor cancers	Skin Squamous Cell Carcinoma	5	4 (3%)	0	0 (0%)		17	10 (20%)	14	7 (15%)	52	20 (24%)	0	0 (0%)		0	0 (0%)
		Skin Keratoacanthoma	1	1 (1%)	0	0 (0%)		3	3 (6%)	0	0 (0%)	9	8 (10%)	0	0 (0%)		0	0 (0%)
		Hepatocellular Carcinoma	2	2 (1%)	0	0 (0%)		5	5 (10%)	2	1 (2%)	9	9 (11%)	0	0 (0%)		0	0 (0%)
		Hepatocellular Adenoma	4	3 (2%)	0	0 (0%)		15	9 (18%)	16	6 (13%)	79	42 (50%)	1	1 (5%)		0	0 (0%)
		↓Adenoma, Multiple Types	25	16 (12%)	0	0 (0%)		3	3 (6%)	11	11 (24%)	39	31 (37%)	1	1 (5%)		0	0 (0%)
		↓Adenocarcinoma, Multiple Types	3	3 (2%)	0	0 (0%)		10	8 (16%)	10	10 (22%)	9	8 (10%)	2	2 (11%)		0	0 (0%)
		↓Carcinoma, Multiple Types	0	0 (0%)	0	0 (0%)		6	6 (12%)	5	5 (11%)	6	6 (7%)	0	0 (0%)		0	0 (0%)
		↓Sarcoma	0	0 (0%)	0	0 (0%)		7	7 (14%)	6	6 (13%)	6	6 (7%)	0	0 (0%)		0	0 (0%)
		Papilloma	1	1 (1%)	0	0 (0%)		1	1 (2%)	2	2 (4%)	4	3 (4%)	0	0 (0%)		0	0 (0%)
		↓Astrocytoma	34	34 (26%)	0	0 (0%)		2	2 (4%)	5	5 (11%)	3	3 (4%)	0	0 (0%)		0	0 (0%)
		Hemangiosarcoma	0	0 (0%)	0	0 (0%)		0	0 (0%)	1	1 (2%)	3	3 (4%)	4	4 (21%)		0	0 (0%)
		Hemangioma	1	1 (1%)	0	0 (0%)		0	0 (0%)	2	2 (4%)	2	2 (2%)	1	1 (5%)		0	0 (0%)
		Fibrosarcoma	0	0 (0%)	0	0 (0%)		4	4 (8%)	4	4 (9%)	2	2 (2%)	1	1 (5%)		0	0 (0%)
		Metastasis	0	0 (0%)	0	0 (0%)		2	2 (4%)	7	7 (15%)	2	2 (2%)	0	0 (0%)		0	0 (0%)
		Mast Cell Tumor	0	0 (0%)	0	0 (0%)		0	0 (0%)	1	1 (2%)	1	1 (1%)	0	0 (0%)		0	0 (0%)
		Trichoepithelioma	0	0 (0%)	0	0 (0%)		0	0 (0%)	0	0 (0%)	1	1 (1%)	0	0 (0%)		0	0 (0%)
		Osteosarcoma	0	0 (0%)	0	0 (0%)		1	1 (2%)	4	4 (9%)	0	0 (0%)	1	1 (5%)		0	0 (0%)
		Schwannoma	1	1 (1%)	0	0 (0%)		1	1 (2%)	0	0 (0%)	0	0 (0%)	1	1 (5%)		0	0 (0%)
		Myoepithlioma	0	0 (0%)	0	0 (0%)		1	1 (2%)	0	0 (0%)	0	0 (0%)	0	0 (0%)		0	0 (0%)
		Rhabdomyosarcoma	0	0 (0%)	0	0 (0%)		0	0 (0%)	1	1 (2%)	0	0 (0%)	0	0 (0%)		0	0 (0%)
		Medulloblastoma	0	0 (0%)	0	0 (0%)		0	0 (0%)	1	1 (2%)	0	0 (0%)	0	0 (0%)		6	6 (8%)
		Hepatoblastoma	1	1 (1%)	0	0 (0%)		0	0 (0%)	0	0 (0%)	0	0 (0%)	0	0 (0%)		0	0 (0%)
	Hema*	↓Lymphoma	1	1 (1%)	2	2 (9%)		8	8 (16%)	2	2 (4%)	2	2 (2%)	1	1 (5%)		28	28 (36%)
		Leukemia	0	0 (0%)	0	0 (0%)		0	0 (0%)	1	1 (2%)	0	0 (0%)	0	0 (0%)		78	78 (100%)
		↓Histiocytic Sarcoma	0	0 (0%)	0	0 (0%)		2	2 (4%)	5	5 (11%)	8	8 (10%)	3	3 (16%)		0	0 (0%)
		Totals (tumors/mouse)	79 (0.74)	107	2 (0.09)	23		88 (1.73)	51	100 (2.17)	46	237 (2.72)	87	16 (0.84)	19		112 (1.44)	78
	Adenocarcinoma observed in...		SB-Onc2.3|Trp53+/+		SB-Onc2.3|Trp53+/+			SB-Onc3|Trp53-KO/+		SB-Onc3|Trp53-R172H/+		SB-Onc3|Trp53+/+		Trp53-R172H/+ Controls			SB-Onc2.3|Trp53+/+
		Liver	0		0			0		1		0		1			0
		Lung	1		0			2		3		2		6			0
		Mammary	0		0			2		3		0		1			0
		Nasal Cavity	0		0			1		0		0		0			0
		Pancreas	0		0			2		1		0		1			0
		Salivary Gland	0		0			2		0		0		0			0
		Shoulder	0		0			1		0		0		0			0
		Thymus	0		0			0		0		0		1			0
		Uterus	2		0			1		0		0		0			0
		Adenocarcinoma Total	3		0			11		8		2		10			0
	Adenoma observed in…		SB-Onc2.3|Trp53+/+		SB-Onc2.3|Trp53+/+			SB-Onc3|Trp53-KO/+		SB-Onc3|Trp53-R172H/+		SB-Onc3|Trp53+/+		Trp53-R172H/+ Controls			SB-Onc2.3|Trp53+/+
		Harderian Gland	4		0			0		0		0		0			0
		Intestine, Colon	0		0			1		1		0		0			0
		Kidney	2		0			0		0		0		0			0
		Liver	0		0			0		14		0		0			0
		Lung	11		0			1		14		1		2			0
		Ovary	6		0			0		0		0		0			0
		Pancreas	0		0			0		4		0		5			0
		Pituitary	0		0			1		1		0		4			0
		Salivary Gland	0		0			0		3		0		0			0
		Sebaceous Gland	0		0			0		1		0		0			0
		Stomach	1		0			0		0		0		0			0
		Adenoma Total	24		0			3		38		1		11			0
	Astrocytoma observed in…		SB-Onc2.3|Trp53+/+		SB-Onc2.3|Trp53+/+			SB-Onc3|Trp53-KO/+		SB-Onc3|Trp53-R172H/+		SB-Onc3|Trp53+/+		Trp53-R172H/+ Controls			SB-Onc2.3|Trp53+/+
		Brain	11		0			0		2		1		0			0
		Nasal Cavity	1		0			0		0		0		0			0
		Spinal Cord	22		0			2		3		2		0			0
		Astrocytoma Total	34		0			2		5		3		0			0
	Carcinoma observed in…		SB-Onc2.3|Trp53+/+		SB-Onc2.3|Trp53+/+			SB-Onc3|Trp53-KO/+		SB-Onc3|Trp53-R172H/+		SB-Onc3|Trp53+/+		Trp53-R172H/+ Controls			SB-Onc2.3|Trp53+/+
		Esophagus	0		0			1		0		0		2			0
		Intestine, Jejunum	0		0			3		0		0		0			0
		Liver	0		0			0		2		0		0			0
		Mesentery/Omentum	0		0			2		2		0		1			0
		Pituitary	0		0			0		0		0		2			0
		Skin	0		0			0		1		0		0			0
		Carcinoma Total	0		0			6		5		0		5			0
	Sarcoma observed in…		SB-Onc2.3|Trp53+/+		SB-Onc2.3|Trp53+/+			SB-Onc3|Trp53-KO/+		SB-Onc3|Trp53-R172H/+		SB-Onc3|Trp53+/+		Trp53-R172H/+ Controls			SB-Onc2.3|Trp53+/+
		Heart	0		0			1		0		0		1			0
		Liver	0		0			2		1		0		0			0
		Mesentery/Omentum	0		0			1		2		0		1			0
		Nasal Cavity	0		0			3		3		0		4			0
		Sarcoma Total	0		0			7		6		0		6			0
	Histiocytic Sarcoma observed in…		SB-Onc2.3|Trp53+/+		SB-Onc2.3|Trp53+/+			SB-Onc3|Trp53-KO/+		SB-Onc3|Trp53-R172H/+		SB-Onc3|Trp53+/+		Trp53-R172H/+ Controls			SB-Onc2.3|Trp53+/+
		Bone Marrow	0		0			0		0		2		0			0
		Duodenum	0		0			0		0		1		0			0
		Gall Bladder	0		0			0		0		0		1			0
		Intestine, Rectum	0		0			0		0		1		0			0
		Kidney	0		0			0		1		2		0			0
		Liver	0		0			1		1		2		0			0
		Lung	0		0			1		2		3		0			0
		Lymph Node, Mandibular	0		0			0		0		1		1			0
		Lymph Node, Mesenteric	0		0			0		1		2		1			0
		Lymph Node, Other	0		0			0		0		1		0			0
		Mammary	0		0			1		0		0		0			0
		Pancreas	0		0			1		2		3		0			0
		Salivary Gland	0		0			0		0		1		0			0
		Spleen	0		0			0		1		3		2			0
		Thymus	0		0			0		0		1		0			0
		Histiocytic Sarcoma Total	0		0			4		8		23		5			0
	Lymphoma observed in…		SB-Onc2.3|Trp53+/+		SB-Onc2.3|Trp53+/+			SB-Onc3|Trp53-KO/+		SB-Onc3|Trp53-R172H/+		SB-Onc3|Trp53+/+		Trp53-R172H/+ Controls			SB-Onc2.3|Trp53+/+
		Adrenal	0		0			0		0		0		1			0
		Bone Marrow	0		0			5		0		2		5			0
		Brain	0		0			0		0		1		2			1
		Gall Bladder	0		0			1		0		2		0			0
		Heart	0		0			1		1		2		1			0
		Intestine, Colon	0		0			1		0		0		0			0
		Intestine, Duodenum	0		0			0		0		0		2			0
		Intestine, Ileum	0		0			0		0		0		1			0
		Intestine, Jejunum	0		0			1		0		0		1			0
		Kidney	0		0			1		0		1		3			0
		Liver	1		0			5		1		2		8			0
		Lung	0		0			3		2		3		5			2
		Lymph Node, Mandibular	1		0			3		2		5		5			5
		Lymph Node, Mesenteric	1		0			3		1		5		8			7
		Lymph Node, Other	1		0			1		0		4		2			3
		Lymph Node, Popliteal	1		0			0		0		2		3			5
		Lymph Node, Renal	0		0			1		0		0		0			6
		Lymph Node, Superficial	0		0			1		0		0		0			8
		Nasal Cavity	0		0			0		0		0		1			0
		Nerve & Ganglion	0		0			1		0		0		0			0
		Omentum	0		0			0		0		1		0			0
		Ovary	0		0			0		0		0		1			0
		Pancreas	0		0			3		0		5		0			0
		Pituitary	0		0			0		1		1		1			0
		Pleura	0		0			0		0		1		0			0
		Salivary Gland	0		0			1		0		3		2			0
		Spinal Cord	0		0			0		0		0		1			0
		Spleen	1		0			5		1		5		10			0
		Thymus	0		2			5		2		5		5			12
		Uterus	0		0			0		0		0		1			0
		Vertebrae	0		0			1		0		0		2			0
		Lymphoma Total	6		2			43		11		50		71			49
	*hematopoietic cancers, often observed within many different tissue histologies at time of necropsy (see accompanying table)

## Sheet: ST2
Sequencing projects summary	Skin	Lung				Liver		Ovary/Uterus	Multiorgan	Onc2.3-Pan-Tumor
Project code	cuSCC-Onc2.3_SBC	Lung-Onc3_454	Lung-Onc3_SBC	Lung-Onc2.3_SBC	Lung-Onc2.3+Onc3_SBC	HCA-Onc3_454	HCA-Onc2.3_SBC	Ovary-Onc2.3_SBC	Other-Onc2.3_SBC	27-Onc2.3-tumors_SBC
Organ	Skin	Lung	Lung	Lung	Lung	Liver	Liver	Ovary, Uterus	Brain, Colon, Kidney, Preputial gland, Sternum	Skin, Liver, Lung, Ovary, Uterus, Brain, Colon, Kidney, Preputial Gland, Sternum
Tumor type: subtype	Non-melanoma skin cancer	Lung cancer	Lung cancer	Lung cancer	Lung cancer	Liver cancer	Liver cancer	adenoma; carcinoma	Various	Various
Tumor Subtype	Skin keratoacanthoma and cutaneous squamous cell carcinoma	Lung, alveolar adenoma/adenocarcinoma	Lung, alveolar adenoma/adenocarcinoma	Lung, alveolar adenoma/adenocarcinoma	Lung, alveolar adenoma/adenocarcinoma	Hepatocellular adenoma/adenocarcinoma	Hepatocellular adenoma/adenocarcinoma	Ovarian adenoma/adenocarcinoma, granulosa cell carcinoma, papillary adenoma	Astrocytoma, Polyploid adenoma, Renal tubular cell adenoma, Carcinoma, and Schwannoma	Skin cutaneous squamous cell carcinoma; Lung, alveolar adenoma/adenocarcinoma; Hepatocellular adenoma/adenocarcinoma; Ovarian/Uterus adenoma/adenocarcinoma, granulosa cell carcinoma, papillary adenoma; Cerebellum, astrocytoma; Colon, polyploid adenoma; Kidney, renal tubular cell adenoma; Preputial gland, carcinoma, and Sternum, Schwannoma
SB Transposon(s)	T2/Onc2.3	T2/Onc3	T2/Onc3	T2/Onc2.3	T2/Onc2.3 + T2/Onc3	T2/Onc3	T2/Onc2.3	T2/Onc2.3	T2/Onc2.3	T2/Onc2.3
Sensitizing mutation genotypes	none	Trp53 +/+ or KO/+ or R172H/+	Trp53 +/+ or KO/+ or R172H/+	none	Trp53 +/+ or KO/+ or R172H/+	Trp53 +/+ or KO/+ or R172H/+	none	none	none	none
Number of mice	5	29	10	3	13	54	5	4	4	31
Number of tumor or normal samples	6	29	10	6	16	95	6	4	5	37
Sequencing Method and Platform	SBCapSeq with Ion Proton	Splink-PCR with 454T	SBCapSeq with Ion Proton	SBCapSeq with Ion Proton	SBCapSeq with Ion Proton	Splink-PCR with 454T	SBCapSeq with Ion Proton	SBCapSeq with Ion Proton	SBCapSeq with Ion Proton	SBCapSeq with Ion Proton
Number of Non-Donor Discovery Drivers	SB Driver Analysis not performed	118	SB Driver Analysis not performed	SB Driver Analysis not performed	157	1101	SB Driver Analysis not performed	SB Driver Analysis not performed	SB Driver Analysis not performed	1245
Number of Non-Donor Progression Drivers	SB Driver Analysis not performed	110	SB Driver Analysis not performed	SB Driver Analysis not performed	44	658	SB Driver Analysis not performed	SB Driver Analysis not performed	SB Driver Analysis not performed	363
Number of Non-Donor Trunk Drivers	SB Driver Analysis not performed	64	SB Driver Analysis not performed	SB Driver Analysis not performed	SB Driver Analysis not performed	39	SB Driver Analysis not performed	SB Driver Analysis not performed	SB Driver Analysis not performed	45
Number of Donor Discovery Drivers	SB Driver Analysis not performed	SB Driver Analysis not performed	SB Driver Analysis not performed	SB Driver Analysis not performed	SB Driver Analysis not performed	124	SB Driver Analysis not performed	SB Driver Analysis not performed	SB Driver Analysis not performed	254
Number of Donor Progression Drivers	SB Driver Analysis not performed	32	SB Driver Analysis not performed	SB Driver Analysis not performed	SB Driver Analysis not performed	84	SB Driver Analysis not performed	SB Driver Analysis not performed	SB Driver Analysis not performed	113
Number of Donor Trunk Drivers	SB Driver Analysis not performed	25	SB Driver Analysis not performed	SB Driver Analysis not performed	SB Driver Analysis not performed	84	SB Driver Analysis not performed	SB Driver Analysis not performed	SB Driver Analysis not performed	8
										>99 reads trunk cut-off

## Sheet: ST3
Sample ID	Necropsy ID	Genotype	Pathology	Cohort	Reads	Reads Containing IRDR	Reads with IRDR and no neighboring vector	Reads with IRDR, no neighboring vector, and mappable mouse element	Reads with IRDR, no neighboring vector, unique mouse TA element	Normalized, filtered TA site reads	SBCapSeq insertions into genes	SBCapSeq insertions	Gene hit rate	Genes with highest (read depth) insertions:	Other selected known genes with high (read depth) insertions:
HoneydewSepia232.MS-1	10-2070	SB-Onc2.3(TG.14942); P53 +/+	cuSCC, muzzle skin	cuSCC	2065031	55012	55012	37600	37273	35551	565	1043	0.54	Mark4 (2900), Trip12 (1700), Tcf12 (1654), and Mbd2 (1563)	Cux1 (940), Rere (818), and Cul3 (208)
HoneydewSepia232.MS-2	10-2070	SB-Onc2.3(TG.14942); P53 +/+	cuSCC, dorsal abdominal skin	cuSCC	6190470	44653	44653	28017	27621	27049	2883	5717	0.5	Lcmt1 (550), Pxn (476), Piclam (430)	Tgfb2 (289), Rasa1 (286), Cobl (202)
HoneydewSepia245.MS-1	10-2458	SB-Onc2.3(TG.14942); P53 +/+	cuSCC/cuKA, facial skin	cuSCC	2510513	62972	62972	39156	38749	37447	707	1172	0.6	Rnf43 (369), Tlk2 (276), Hnrnpm (189)	Prkca (119), Trip12 (111)
HoneydewSepia251.MS-1	10-2475	SB-Onc2.3(TG.14942); P53 +/+	cuSCC, Ventral cervical skin	cuSCC	2178020	117598	117598	76318	75424	72977	1418	2495	0.57	Rcc2 (925), Paics (338), Galntl6 (184)	Casp8 (157), Erbb4 (105)
StrawSepia266.MS-1	10-0464	SB-Onc2.3(TG.14922); P53 +/+	cuSCC, dorsal skin	cuSCC	4855081	221756	221756	149040	146997	143530	2862	5043	0.57	Mtss1 (609), Osbpl9 (569), Casp8 (455), Cmip (435)	Cul3 (129)
StrawSepia269.MS-2	10-0548	SB-Onc2.3(TG.14922); P53 +/+	cuSCC/cuKA, dorsal skin	cuSCC	7136820	46739	46739	30193	29774	29045	3644	7033	0.52	Lrch1 (727), Hook3 (682), Cnot1 (642), Arhgef2 (637)	Arhgap31 (634), Rasa1 (414, 231), Nf1 (336)
Fern120-MS-5	10-0756	SB-Onc3 (TG.12740); P53 +/+	Lung, alveolar adenocarcinoma	Lung	1676768	71827	71827	44713	44433	44607	49	77	0.64	Ndfip2 (3066), Mrpl4 (2558), Pik3cb (1819), Sik3 (1653)
Fern127-MS-1	09-0385	SB-Onc3 (TG.12740); P53 R172H/+	Lung, alveolar adenocarcinoma	Lung	2544665	118653	118653	69419	68645	66672	28	56	0.5	Kalrn (7092), Cdcp1 (6425), Pex1 (44639), Rasgrf1 (3006)	Tgfb2 (1220)
Fern160-MS-3	09-0968	SB-Onc3 (TG.12740); P53 R172H/+	Lung, alveolar adenocarcinoma	Lung	1724796	75605	75605	46180	45688	46141	21	33	0.64	Rasgrf1 (12688), Il1rap (5220), Kdm2a (3119), Tfdp2 (2868), Sik3 (2824)
Fern224-MS-2	09-1586	SB-Onc3 (TG.12740); P53 +/+	Lung, alveolar adenocarcinoma	Lung	5632324	340315	340315	222565	220796	217861	338	620	0.55	Kcnj15 (9273), Ptprk (4525), Rasgrf1 (3291)
Soot54-MS-2	10-1261	SB-Onc3 (TG.12740); P53 KO/+	Lung, alveolar adenocarcinoma	Lung	2046027	34177	34177	21712	21529	21687	10	13	0.77	Rasgrf1 (6053), Bbs9 (5240), Far1 (2919)
Tan173-MS-1	09-0320	SB-Onc3 (TG.12740); P53 KO/+	Lung, alveolar adenocarcinoma	Lung	511719	11489	11489	7659	7594	6558	20	33	0.61	Hmbox1 (827), Maml2 (420), Pard3 (419), Suz12 (411)
Tan276-MS-1	09-0429	SB-Onc3 (TG.12740); P53 KO/+	Lung, alveolar adenocarcinoma	Lung	2631479	83562	83562	53491	52923	52115	29	62	0.47	Agps (2650), Ssh2 (2456), Enox2 (1387)	Rapgef6 (896), Rasgrf1 (310)
Tan282-MS-1	09-0872	SB-Onc3 (TG.12740); P53 KO/+	Lung, alveolar adenoma, large cell type	Lung	1181815	39547	39547	24508	23485	22152	31	72	0.43	Fbxl17 (1367), Ints6 (1117), Slco2a1 (1087), Acp1 (936)
Tan302-MS-2	09-1095	SB-Onc3 (TG.12740); P53 +/+	Lung, alveolar papillary adenocarcinoma	Lung	1958390	63154	63154	38988	38319	38696	31	59	0.53	Rbpms (1765), Myo5a (1647), Ereg (1608), Ptprd (1540	Rasa1 (1245), Cdkn2a (782)
Tan308-MS-7	09-0833	SB-Onc3 (TG.12740); P53 KO/+	Lung, alveolar adenocarcinoma	Lung	1549079	57715	57715	41126	40873	41080	26	33	0.79	1700112E06Rik (4547), Pvt1 (4165), Rasgrf1 (3969)
HoneydewSepia187.MS-2	10-1813	SB-Onc2.3(TG.14942); P53 +/+	Lung, alveolar adenoma	Lung	6353016	435551	435551	284507	281389	274692	4401	8202	0.54	Stag2 (4001), Pkhd1 (3310), Rgs21 (3199), Mkln1 (2591)	Arid1b (191), Trip12 (155), Itch (155)
HoneydewSepia187.MS-3	10-1813	SB-Onc2.3(TG.14942); P53 +/+	Lung, alveolar adenoma	Lung	3883814	28332	28332	18231	18054	17602	2013	3621	0.56	Ankrd12 (627), Car8 (578), Gsk3b (577)	Cul3 (189,188), Trip12 (114)
HoneydewSepia236.MS-1	10-1482	SB-Onc2.3(TG.14942); P53 +/+	Lung, alveolar adenocarcinoma	Lung	2172337	20352	20352	14125	13934	13764	485	994	0.49	Dgkd (360), Wdr26 (317), Arfgef3 (295)	Rapgef5 (225), Gnaq (175)
HoneydewSepia236.MS-2	10-1482	SB-Onc2.3(TG.14942); P53 +/+	Lung, alveolar adenocarcinoma	Lung	3014896	209891	209891	136643	134942	130727	2765	5086	0.54	4930558K02Rik (461), Mllt10 (220), Ptgfrn (202)	Trip12 (141), Rnf43 (120)
HoneydewSepia236.MS-3	10-1482	SB-Onc2.3(TG.14942); P53 +/+	Lung, alveolar adenoma	Lung	4730448	350368	350368	227864	225372	220021	3587	6539	0.55	Ankrd44 (857), Pde10a (723), Crlf3 (684), Desi2 (657)	Arfgef3 (471), Gnaq (375), Trip12 (240)
HoneydewSepia265.MS-4	11-0508	SB-Onc2.3(TG.14942); P53 +/+	Lung, alveolar adenocarcinoma	Lung	6003296	441662	441662	314072	311567	307764	3083	5335	0.58	Rnf43 (11163), Syde2 (10797), Ctnna1 (10290)	Lpp (7916), Cux1 (995)
HoneydewSepia253.MS-2	10-2539	SB-Onc2.3(TG.14942); P53 +/+	Liver, adenoma, basophilic	HCA	4477194	60913	60913	39202	38784	37652	774	1308	0.59	Brd4 (326) Arpc2 (296), Cul3 (198, 127)	Taok3 (117), Ncoa3 (102)
StrawSepia196.MS-1	10-1500	SB-Onc2.3(TG.14922); P53 +/+	Liver, adenoma, possibly amphiphilic	HCA	6741472	426602	426602	282226	279699	273876	4949	8429	0.59	Ptpn14 (3364), Anxa9 (2989), Rasa1 (2808), Rfwd2 (2606,2257)
StrawSepia196.MS-2	10-1500	SB-Onc2.3(TG.14922); P53 +/+	Liver, adenoma, possibly amphiphilic	HCA	5385148	356476	356476	222528	219816	214483	3645	6085	0.6	Max (5145, 2091), Zbtb20 (4239), Zfr (4038), Rbm33 (3183), Adk (2594)	Kdm5a (882,678), Pik3r1 (680)
StrawSepia249.MS-1	09-1877	SB-Onc2.3(TG.14922); P53 +/+	Liver, adenoma, lipid type	HCA	13158807	1478155	1478155	978680	968958	949376	12652	22695	0.56	Abcc2 (8158), Smek1 (6953), Chsy3 (6587)
StrawSepia251.MS-1	10-0865	SB-Onc2.3(TG.14922); P53 +/+	Liver, hepatoblastoma	HCA	3710655	177967	177967	114797	109855	108464	896	1676	0.53	Elavl1 (5708), Fto (2831), Oxsr1 (2592), Rab10 (2392)
StrawSepia267.MS-1	10-0671	SB-Onc2.3(TG.14922); P53 +/+	Liver, adenoma	HCA	6773781	629984	629984	425375	417948	409295	5092	8842	0.58	Ankrd11 (7306), Rac1 (7220), Itih2 (6881), Egfr (6394)	Pten (1772)
HoneydewSepia187.MS-1	10-1813	SB-Onc2.3(TG.14942); P53 +/+	Ovary, adenoma/Papillary	Ovary	11385252	125292	125292	82998	82066	80359	4840	8227	0.59	Wac (1300), Serbp1 (1193), Zbtb41 (995)
HoneydewSepia265.MS-1	11-0508	SB-Onc2.3(TG.14942); P53 +/+	Ovary, granulosa cell carcinoma	Ovary	5965731	179830	179830	111411	109520	106640	709	1235	0.57	Sema4c (1361), Atp6v1h (1122), Cul3 (1113)
StrawSepia0267-MS-2	10-0671	SB-Onc2.3(TG.14942); P53 +/+	Ovary, adenoma	Ovary	2448294	28110	28110	17317	17082	16733	1777	3214	0.55	Apc (306), Cltc (273), Cxadr (256), Cdc42 (200)	Adk (157)
HoneydewSepia265.MS-2	11-0508	SB-Onc2.3(TG.14942); P53 +/+	Uterus, adenocarcinoma	Ovary/Uterus	7867933	56709	56709	37973	37159	36757	2216	3909	0.57	Scml4 (712), Raver1 (579), Naa25 (563)	Nf1 (520,442), Pten (413), Chek2 (329)
HoneydewSepia217.MS-1	10-1108	SB-Onc2.3(TG.14942); P53 +/+	Cerebellum, Astrocytoma	Astrocytoma	9035570	82893	82893	45746	45046	43150	8885	14737	0.6	No evidence of clonal selection, highest read depth was 22 (background insertions)
HoneydewSepia239.MS-2	11-0172	SB-Onc2.3(TG.14942); P53 +/+	Colon, adenoma, polyploid	Colon	2150458	5636	5636	3579	3532	3465	492	882	0.56	Rere (310), Parp1 (158), Apc (129), and Dis3 (109)
StrawSepia234.MS-1	09-1950	SB-Onc2.3(TG.14922); P53 +/+	Kidney, mass-tubular cell adenoma	Kidney	5727603	58770	58770	37104	36540	35677	3622	5544	0.65	Flcn (671), A330076H08Rik (627), Large (382), Gna13 (332)	Ctnnd1 (148), Ctnna1 (132)
HoneydewSepia239.MS-1	11-0172	SB-Onc2.3(TG.14942); P53 +/+	Preputial gland, carcinoma	Preputial	6107035	9248	9248	5575	5503	5289	980	1668	0.59	Mical3 (137), Wipf2 (120), Nck2 (100)
HoneydewSepia292.MS-1	10-2513	SB-Onc2.3(TG.14942); P53 +/+	Sternum, Schwannoma	Schwannoma	3199741	191607	191607	114327	112316	110498	204	417	0.49	Atxn1 (2957), Ndufs4 (2664), Usp6nl (1996), Tmem164 (1990), Rab2a (1980), Ctnnd1 (1737)	Rasa1 (966,899,675)
				Totals	166685478	6799122	6799122	4444965	4389205	4299452	80729	142206	0.567691
				% of Total	1	0.0407901	0.0407901	0.0266668	0.0263323	0.0257938
				% of Reads with IRDR			1	0.653756	0.645555	0.632354

## Sheet: ST4
Chr	start	end	TumorID	reads	strand	gene(s)	gene_direction_activating
chr7	20021486	20021487	HoneyDewSepia0232-MS-1	2900	+	Mark4
chr10	93854966	93854967	HoneyDewSepia0232-MS-1	2863	+
chr3	157513867	157513868	HoneyDewSepia0232-MS-1	2206	-
chr1	84810780	84810781	HoneyDewSepia0232-MS-1	1700	-	Trip12	Trip12
chr9	71821584	71821585	HoneyDewSepia0232-MS-1	1654	+	Tcf12
chr18	70747240	70747241	HoneyDewSepia0232-MS-1	1563	-	Mbd2
chr12	9368934	9368935	HoneyDewSepia0232-MS-1	1503	+
chr17	55066338	55066339	HoneyDewSepia0232-MS-1	1393	+
chr1	133631355	133631356	HoneyDewSepia0232-MS-1	1317	+
chr5	87084169	87084170	HoneyDewSepia0232-MS-1	1197	+
chr1	111237878	111237879	HoneyDewSepia0232-MS-1	1161	+
chr5	65865569	65865570	HoneyDewSepia0232-MS-1	1157	-	Smim14	Smim14
chr1	143619080	143619081	HoneyDewSepia0232-MS-1	1116	+
chr17	6179123	6179124	HoneyDewSepia0232-MS-1	1078	+	Tulp4	Tulp4
chr17	83822515	83822516	HoneyDewSepia0232-MS-1	1013	-	Eml4
chr10	116001039	116001040	HoneyDewSepia0232-MS-1	991	+	Cnot2
chr5	136759961	136759962	HoneyDewSepia0232-MS-1	940	-	Cux1	Cux1
chr1	158568223	158568224	HoneyDewSepia0232-MS-1	929	-	Abl2
chr4	140262692	140262693	HoneydewSepia0251-MS-1	925	-	Rcc2
chrX	44640808	44640809	HoneyDewSepia0232-MS-1	920	+
chr4	140282150	140282151	HoneydewSepia0245-MS-1	900	-
chr4	92997565	92997566	HoneyDewSepia0232-MS-1	851	+
chr4	149670388	149670389	HoneyDewSepia0232-MS-1	818	+	Rere	Rere
chr14	75217133	75217134	StrawSepia0269-MS-2	727	+	Lrch1
chr8	27223946	27223947	StrawSepia0269-MS-2	682	-	Hook3	Hook3
chr8	98299105	98299106	StrawSepia0269-MS-2	642	+	Cnot1
chr3	88438047	88438048	StrawSepia0269-MS-2	637	-	Arhgef2
chr16	38710603	38710604	StrawSepia0269-MS-2	634	+	Arhgap31
chr17	26814733	26814734	HoneyDewSepia0232-MS-1	619	-	Atp6v0e
chr3	104813029	104813030	StrawSepia0269-MS-2	616	-	Cttnbp2nl	Cttnbp2nl
chr15	58776107	58776108	StrawSepia0266-MS-1	609	-	Mtss1	Mtss1
chr4	108742056	108742057	StrawSepia0266-MS-1	569	+	Osbpl9
chr7	130558810	130558811	HoneyDewSepia0232-MS-2	550	-	Lcmt1
chr9	24323612	24323613	HoneyDewSepia0232-MS-1	510	-
chr2	129019690	129019691	StrawSepia0269-MS-2	496	-
chr5	115979033	115979034	HoneyDewSepia0232-MS-2	476	+	Pxn	Pxn
chr1	58899860	58899861	StrawSepia0266-MS-1	455	-	Casp8
chr13	17802743	17802744	StrawSepia0269-MS-2	435	-
chr8	119867824	119867825	StrawSepia0266-MS-1	435	+	Cmip	Cmip
chr7	97317261	97317262	HoneyDewSepia0232-MS-2	430	-	Picalm
chrX	123686563	123686564	HoneyDewSepia0232-MS-1	423	-
chr13	45719775	45719776	StrawSepia0269-MS-2	422	-	Atxn1	Atxn1
chr10	64756692	64756693	StrawSepia0269-MS-2	421	+
chr13	85426447	85426448	StrawSepia0269-MS-2	414	+	Rasa1
chr1	185561796	185561797	StrawSepia0266-MS-1	403	+
chr16	11543567	11543568	HoneyDewSepia0232-MS-1	380	-	Snx29
chr3	47367393	47367394	StrawSepia0269-MS-2	379	+
chr15	80856242	80856243	StrawSepia0269-MS-2	377	-	Mkl1	Mkl1
chr11	119830894	119830895	StrawSepia0269-MS-2	376	+	Baiap2	Baiap2
chr3	137034754	137034755	StrawSepia0269-MS-2	372	-	Emcn
chr4	138707182	138707183	HoneyDewSepia0232-MS-1	372	+
chr11	87523242	87523243	HoneydewSepia0245-MS-1	369	+	Rnf43	Rnf43
chr8	108711489	108711490	HoneyDewSepia0232-MS-2	362	+	Slc7a6	Slc7a6
chr15	81018727	81018728	StrawSepia0266-MS-1	359	-	Mkl1	Mkl1
chr5	77383481	77383482	HoneydewSepia0251-MS-1	338	+	Paics	Paics
chr11	79218428	79218429	StrawSepia0269-MS-2	336	-	Nf1
chr1	174012074	174012075	HoneyDewSepia0232-MS-2	320	+	Ncstn
chr1	170200647	170200648	HoneyDewSepia0232-MS-2	310	+	Pbx1
chr14	84775171	84775172	HoneyDewSepia0232-MS-1	306	-
chr12	52874658	52874659	StrawSepia0269-MS-2	295	-	Hectd1	Hectd1
chr1	188485585	188485586	HoneyDewSepia0232-MS-2	289	+	Tgfb2
chr10	8000485	8000486	HoneyDewSepia0232-MS-2	289	-	Ust	Ust
chr13	85385408	85385409	HoneyDewSepia0232-MS-2	286	-	Rasa1	Rasa1
chr8	93844234	93844235	StrawSepia0269-MS-2	286	+	Fto	Fto
chr6	138375493	138375494	StrawSepia0269-MS-2	280	+	A830011K09Rik|Lmo3	A830011K09Rik
chr11	105052931	105052932	HoneydewSepia0245-MS-1	276	-	Tlk2
chr7	83728333	83728334	HoneyDewSepia0232-MS-2	270	-	Agbl1
chr19	9057224	9057225	StrawSepia0266-MS-1	254	+
chr10	121924857	121924858	HoneyDewSepia0232-MS-2	248	+
chr2	163974551	163974552	StrawSepia0266-MS-1	248	+	Stk4	Stk4
chr1	132658035	132658036	HoneydewSepia0251-MS-1	245	-
chr1	42430527	42430528	HoneyDewSepia0232-MS-2	238	-
chr13	85427344	85427345	StrawSepia0269-MS-2	231	-	Rasa1	Rasa1
chr3	139580665	139580666	HoneyDewSepia0232-MS-2	225	+
chr1	4743018	4743019	HoneyDewSepia0232-MS-2	222	-
chr15	35466017	35466018	HoneyDewSepia0232-MS-2	221	+	Vps13b	Vps13b
chr1	126057331	126057332	StrawSepia0266-MS-1	215	+
chr15	97866243	97866244	StrawSepia0266-MS-1	213	+
chr11	77808468	77808469	StrawSepia0266-MS-1	209	+	Phf12	Phf12
chr1	80273411	80273412	HoneyDewSepia0232-MS-1	208	+	Cul3
chr13	88917639	88917640	HoneyDewSepia0232-MS-2	208	-
chr1	93964352	93964353	HoneyDewSepia0232-MS-1	205	-	Hdac4	Hdac4
chr9	50521654	50521655	HoneyDewSepia0232-MS-2	205	+	Dixdc1
chr11	12216089	12216090	HoneyDewSepia0232-MS-2	202	+	Cobl
chr16	49933272	49933273	StrawSepia0266-MS-1	202	-
chr9	69248555	69248556	HoneyDewSepia0232-MS-1	196	-	Ice2
chr7	107930374	107930375	StrawSepia0266-MS-1	193	+	Fam168a	Fam168a
chr5	130258707	130258708	HoneyDewSepia0232-MS-2	191	-	Gbas
chr1	144933477	144933478	StrawSepia0266-MS-1	189	+
chr17	33795204	33795205	HoneydewSepia0245-MS-1	189	-	Hnrnpm	Hnrnpm
chr1	191683561	191683562	HoneyDewSepia0232-MS-2	188	+	Ptpn14	Ptpn14
chr8	60956148	60956149	HoneydewSepia0251-MS-1	184	-	Galntl6	Galntl6
chr1	104795859	104795860	HoneyDewSepia0232-MS-2	183	+
chr1	174012074	174012075	HoneydewSepia0245-MS-1	183	+	Ncstn
chr13	21632179	21632180	HoneyDewSepia0232-MS-2	179	-
chr1	193891381	193891382	HoneydewSepia0245-MS-1	178	-	Traf5	Traf5
chr1	182677271	182677272	StrawSepia0266-MS-1	177	+	Acbd3	Acbd3
chr1	10015635	10015636	StrawSepia0266-MS-1	175	+	Cops5
chr13	90631321	90631322	StrawSepia0266-MS-1	175	+
chr3	73467283	73467284	HoneyDewSepia0232-MS-2	174	-	Bche	Bche
chr5	42077721	42077722	HoneyDewSepia0232-MS-2	173	+	Rab28
chr4	115442878	115442879	HoneyDewSepia0232-MS-2	172	-	Efcab14
chr1	125999858	125999859	HoneyDewSepia0232-MS-2	171	+
chr3	66180885	66180886	HoneydewSepia0245-MS-1	171	-
chr6	38208515	38208516	HoneydewSepia0251-MS-1	168	-
chr1	28381332	28381333	StrawSepia0266-MS-1	165	+
chr1	181702238	181702239	StrawSepia0266-MS-1	165	+	Ahctf1
chr2	166600632	166600633	StrawSepia0266-MS-1	161	+
chr5	88807634	88807635	HoneyDewSepia0232-MS-2	161	+	Amtn	Amtn
chr1	177398915	177398916	StrawSepia0269-MS-2	160	-	Rgs7	Rgs7
chr1	103262853	103262854	StrawSepia0266-MS-1	159	+
chr15	35628844	35628845	StrawSepia0266-MS-1	159	-	Vps13b
chr19	8863353	8863354	HoneydewSepia0251-MS-1	159	-
chr2	55286276	55286277	HoneyDewSepia0232-MS-2	159	+
chr19	40980747	40980748	HoneyDewSepia0232-MS-2	158	+	Zfp518a	Zfp518a
chr1	58856270	58856271	HoneydewSepia0251-MS-1	157	+	Casp8	Casp8
chr1	34894120	34894121	StrawSepia0266-MS-1	155	-	Fam168b	Fam168b
chr9	110443777	110443778	StrawSepia0266-MS-1	155	-	Setd2
chr1	55717831	55717832	StrawSepia0266-MS-1	154	-	Plcl1
chr1	93282977	93282978	StrawSepia0266-MS-1	154	-	Ilkap	Ilkap
chr1	16624186	16624187	HoneydewSepia0251-MS-1	153	+
chr1	140957255	140957256	StrawSepia0266-MS-1	153	+	Dennd1b	Dennd1b
chr10	70057722	70057723	HoneyDewSepia0232-MS-2	153	-	Phyhipl	Phyhipl
chr3	11750981	11750982	HoneydewSepia0245-MS-1	153	-
chr8	46026387	46026388	HoneydewSepia0245-MS-1	153	-
chr1	126304412	126304413	HoneydewSepia0251-MS-1	151	-
chr1	147458942	147458943	StrawSepia0266-MS-1	151	+
chr11	54539355	54539356	StrawSepia0266-MS-1	150	-	Cdc42se2	Cdc42se2
chr5	63079257	63079258	HoneydewSepia0245-MS-1	150	-	Arap2	Arap2
chr9	49025656	49025657	HoneydewSepia0251-MS-1	150	+
chr1	173377498	173377499	StrawSepia0266-MS-1	149	-	F11r
chr5	64204468	64204469	HoneyDewSepia0232-MS-2	149	-	0610040J01Rik
chr6	38547533	38547534	StrawSepia0266-MS-1	149	+	Luc7l2	Luc7l2
chr2	118283621	118283622	StrawSepia0266-MS-1	148	-	Eif2ak4
chr3	113521996	113521997	HoneyDewSepia0232-MS-2	147	-
chr8	125185964	125185965	StrawSepia0266-MS-1	147	+	Cbfa2t3
chr6	32594429	32594430	StrawSepia0266-MS-1	146	-
chr14	78865470	78865471	StrawSepia0266-MS-1	145	-
chr17	73854602	73854603	StrawSepia0266-MS-1	145	+	Galnt14
chr7	114119882	114119883	HoneydewSepia0251-MS-1	145	+
chr1	133304313	133304314	StrawSepia0266-MS-1	144	+	Srgap2
chr16	92041363	92041364	HoneydewSepia0251-MS-1	143	-
chr13	49887561	49887562	HoneydewSepia0245-MS-1	142	-
chr2	62912557	62912558	HoneyDewSepia0232-MS-2	141	-	Kcnh7	Kcnh7
chr2	165265844	165265845	HoneydewSepia0251-MS-1	141	+	Slc13a3
chr1	41320415	41320416	StrawSepia0266-MS-1	140	+
chr14	99184136	99184137	HoneydewSepia0251-MS-1	140	+
chr13	49042971	49042972	HoneydewSepia0245-MS-1	139	-	Fam120a	Fam120a
chr15	30625000	30625001	StrawSepia0266-MS-1	139	-	Ctnnd2
chr15	58595234	58595235	StrawSepia0266-MS-1	139	-
chr2	17858638	17858639	HoneydewSepia0251-MS-1	139	+
chr1	53082071	53082072	StrawSepia0266-MS-1	138	+
chr1	119012431	119012432	StrawSepia0266-MS-1	138	+
chr13	13601879	13601880	StrawSepia0266-MS-1	138	-	Nid1
chrX	152952745	152952746	HoneydewSepia0251-MS-1	138	+
chr16	9151035	9151036	StrawSepia0266-MS-1	137	-
chr16	45790369	45790370	HoneydewSepia0245-MS-1	137	-	Phldb2	Phldb2
chr17	65946896	65946897	HoneydewSepia0251-MS-1	137	-	Vapa	Vapa
chr17	79068603	79068604	StrawSepia0266-MS-1	137	+	Strn
chr15	23412201	23412202	StrawSepia0266-MS-1	136	+
chr2	40974990	40974991	HoneyDewSepia0232-MS-2	135	+	Lrp1b
chr6	108481545	108481546	StrawSepia0266-MS-1	135	-	Itpr1
chr8	28195247	28195248	HoneydewSepia0251-MS-1	133	-
chr8	113105455	113105456	StrawSepia0266-MS-1	133	+	Hydin	Hydin
chr1	158200618	158200619	StrawSepia0266-MS-1	131	-	Tdrd5	Tdrd5
chr1	34130978	34130979	StrawSepia0266-MS-1	130	-	Dst
chr1	104591363	104591364	HoneydewSepia0251-MS-1	130	+
chr18	34659165	34659166	StrawSepia0266-MS-1	130	+	Fam13b
chr1	80307175	80307176	StrawSepia0266-MS-1	129	-	Cul3	Cul3
chr1	179130632	179130633	StrawSepia0266-MS-1	129	+	Akt3
chr4	136897467	136897468	StrawSepia0266-MS-1	129	-	Cdc42	Cdc42
chr6	96649277	96649278	StrawSepia0266-MS-1	129	-
chr1	125249158	125249159	HoneyDewSepia0232-MS-2	128	+	Dpp10
chr1	137786722	137786723	StrawSepia0266-MS-1	128	-	Pkp1	Pkp1
chr16	71202661	71202662	HoneydewSepia0251-MS-1	128	+
chr17	10463064	10463065	StrawSepia0266-MS-1	128	-	Qk	Qk
chrX	143431773	143431774	StrawSepia0266-MS-1	128	+	Htr2c	Htr2c
chr1	58250354	58250355	HoneydewSepia0245-MS-1	127	-	Aox3
chr1	148304827	148304828	HoneydewSepia0251-MS-1	127	+
chr2	11471619	11471620	StrawSepia0266-MS-1	127	+	Pfkfb3
chr1	189125563	189125564	HoneydewSepia0251-MS-1	126	-	Gpatch2
chr10	100604588	100604589	HoneydewSepia0251-MS-1	126	-
chr13	21277871	21277872	StrawSepia0266-MS-1	126	+	Trim27	Trim27
chr7	65395490	65395491	HoneyDewSepia0232-MS-1	126	-
chr1	111321577	111321578	HoneydewSepia0251-MS-1	125	-
chr2	9861924	9861925	StrawSepia0266-MS-1	125	+	Taf3
chr5	43059747	43059748	HoneydewSepia0251-MS-1	125	+
chrX	133855835	133855836	HoneydewSepia0245-MS-1	125	+
chr11	78028085	78028086	HoneydewSepia0245-MS-1	124	+	Supt6
chr12	25747224	25747225	HoneydewSepia0245-MS-1	124	-
chr14	51652231	51652232	StrawSepia0266-MS-1	124	+
chr15	21751146	21751147	HoneyDewSepia0232-MS-2	124	+
chr8	39436257	39436258	StrawSepia0266-MS-1	124	-	Sgcz	Sgcz
chrX	146957844	146957845	StrawSepia0266-MS-1	124	-
chr1	182685127	182685128	StrawSepia0266-MS-1	123	+
chr17	19718052	19718053	StrawSepia0266-MS-1	123	+	Vmn2r101	Vmn2r101
chr5	138114706	138114707	StrawSepia0266-MS-1	123	+	Agfg2
chr9	90653199	90653200	HoneydewSepia0245-MS-1	123	-
chrX	118047476	118047477	StrawSepia0266-MS-1	123	-
chrX	156272078	156272079	HoneydewSepia0245-MS-1	123	-	Sh3kbp1
chr1	101624438	101624439	StrawSepia0266-MS-1	122	-
chr3	135297896	135297897	StrawSepia0266-MS-1	122	-	Nfkb1	Nfkb1
chr6	104691216	104691217	HoneyDewSepia0232-MS-2	122	+	Cntn6	Cntn6
chr8	12700233	12700234	HoneydewSepia0251-MS-1	122	+
chr8	66561437	66561438	HoneydewSepia0251-MS-1	122	+	Tll1
chr11	3061270	3061271	StrawSepia0266-MS-1	121	+	Sfi1
chr14	84305938	84305939	StrawSepia0266-MS-1	121	+
chr2	99902433	99902434	StrawSepia0266-MS-1	121	+
chr2	111376681	111376682	StrawSepia0266-MS-1	121	+
chr4	78778134	78778135	HoneydewSepia0251-MS-1	121	-
chr5	25379515	25379516	HoneydewSepia0245-MS-1	121	+
chr4	119217045	119217046	HoneydewSepia0251-MS-1	120	-	Foxj3
chr11	107861914	107861915	HoneydewSepia0245-MS-1	119	-	Prkca	Prkca
chr16	76317462	76317463	HoneydewSepia0251-MS-1	119	-	Nrip1	Nrip1
chr6	72708711	72708712	StrawSepia0266-MS-1	119	-	Tcf7l1	Tcf7l1
chr7	59756281	59756282	StrawSepia0266-MS-1	119	+
chr12	14579624	14579625	StrawSepia0269-MS-2	118	+
chr2	48781893	48781894	StrawSepia0266-MS-1	118	+	Orc4
chr2	68654072	68654073	StrawSepia0266-MS-1	118	-
chrX	91366748	91366749	HoneydewSepia0251-MS-1	118	+	Zfx
chr1	167045077	167045078	StrawSepia0266-MS-1	117	+
chr14	98391394	98391395	HoneydewSepia0245-MS-1	117	+	Dach1
chr15	64855787	64855788	HoneydewSepia0245-MS-1	117	+
chr16	10962528	10962529	HoneydewSepia0245-MS-1	117	-	Litaf	Litaf
chr3	35586623	35586624	HoneyDewSepia0232-MS-2	117	+
chr8	34941688	34941689	StrawSepia0266-MS-1	117	+	Rbpms
chr1	120298856	120298857	StrawSepia0266-MS-1	116	-	Clasp1
chr18	75675491	75675492	HoneydewSepia0251-MS-1	116	-	Ctif|Gm10532	Ctif
chr3	20229824	20229825	HoneydewSepia0251-MS-1	116	-	Agtr1b	Agtr1b
chr4	147452391	147452392	HoneydewSepia0251-MS-1	116	+	Agtrap
chr5	116837634	116837635	HoneyDewSepia0232-MS-2	116	+
chr1	25261707	25261708	HoneydewSepia0251-MS-1	115	-	Adgrb3	Adgrb3
chr1	50676318	50676319	HoneydewSepia0251-MS-1	115	+
chr1	150895787	150895788	StrawSepia0266-MS-1	115	+
chr10	84484270	84484271	HoneydewSepia0245-MS-1	115	-
chr11	15118863	15118864	HoneydewSepia0251-MS-1	115	-
chr5	18531311	18531312	HoneydewSepia0251-MS-1	115	+
chrX	136492149	136492150	StrawSepia0266-MS-1	115	+	Rbm41
chr1	106322574	106322575	StrawSepia0266-MS-1	114	+
chr14	12432480	12432481	HoneydewSepia0245-MS-1	114	-	Ptprg
chr16	33398122	33398123	StrawSepia0266-MS-1	114	-	Zfp148
chr16	64964008	64964009	HoneyDewSepia0232-MS-2	114	+	Htr1f
chr5	89982287	89982288	StrawSepia0266-MS-1	114	+	Npffr2	Npffr2
chr1	133320738	133320739	StrawSepia0266-MS-1	113	-	Srgap2	Srgap2
chr1	172357575	172357576	HoneydewSepia0251-MS-1	113	+	Nos1ap
chr3	136378877	136378878	HoneydewSepia0251-MS-1	113	-	Ppp3ca
chr1	36949410	36949411	HoneydewSepia0251-MS-1	112	+	Tmem131
chr1	137434336	137434337	StrawSepia0266-MS-1	112	+	Nav1
chr6	140221569	140221570	StrawSepia0266-MS-1	112	+
chr1	82880210	82880211	StrawSepia0266-MS-1	111	+	Agfg1	Agfg1
chr1	84725688	84725689	HoneydewSepia0245-MS-1	111	-	Trip12	Trip12
chr11	38571524	38571525	StrawSepia0266-MS-1	111	+
chr2	74131241	74131242	StrawSepia0269-MS-2	111	+
chr8	89252826	89252827	HoneydewSepia0251-MS-1	111	-	Siah1a	Siah1a
chr9	34415453	34415454	StrawSepia0266-MS-1	111	-	Kirrel3
chr16	22557953	22557954	StrawSepia0266-MS-1	110	-	Dgkg	Dgkg
chr2	89212794	89212795	StrawSepia0266-MS-1	110	+
chr2	96365529	96365530	HoneyDewSepia0232-MS-2	110	-	Lrrc4c
chr6	108566137	108566138	StrawSepia0266-MS-1	110	+	0610040F04Rik
chrX	6027929	6027930	StrawSepia0266-MS-1	110	+	Shroom4	Shroom4
chr1	105475810	105475811	StrawSepia0266-MS-1	109	+
chr11	23595646	23595647	StrawSepia0266-MS-1	109	+	Pus10	Pus10
chr13	9108329	9108330	HoneydewSepia0245-MS-1	109	-	Larp4b
chr16	33484071	33484072	HoneydewSepia0245-MS-1	109	+	Zfp148	Zfp148
chr16	78374673	78374674	HoneydewSepia0245-MS-1	109	+	Btg3|Gm7334
chr18	21198540	21198541	HoneydewSepia0251-MS-1	109	+
chr3	73096211	73096212	StrawSepia0266-MS-1	109	-	Gm20754
chr4	84138118	84138119	HoneydewSepia0251-MS-1	109	-	Bnc2	Bnc2
chr8	121536391	121536392	StrawSepia0266-MS-1	109	+	Cdh13	Cdh13
chr1	79776316	79776317	HoneydewSepia0245-MS-1	108	-	Mrpl44
chr1	137813932	137813933	HoneydewSepia0251-MS-1	108	-	Pkp1	Pkp1
chr10	30266861	30266862	StrawSepia0266-MS-1	108	+	Trmt11
chr10	72874840	72874841	StrawSepia0266-MS-1	108	-
chr16	89678919	89678920	HoneydewSepia0245-MS-1	108	+
chr19	35936306	35936307	StrawSepia0266-MS-1	108	-
chr2	75677359	75677360	HoneydewSepia0251-MS-1	108	+	Agps	Agps
chr3	128716919	128716920	HoneydewSepia0245-MS-1	108	-
chr4	134892503	134892504	StrawSepia0266-MS-1	108	+	Srrm1
chr6	13496843	13496844	HoneyDewSepia0232-MS-2	108	-
chr6	146175655	146175656	HoneydewSepia0251-MS-1	108	+	Itpr2
chr1	106021229	106021230	StrawSepia0266-MS-1	107	+
chr1	140396379	140396380	StrawSepia0266-MS-1	107	+	Nek7
chr10	33654319	33654320	StrawSepia0266-MS-1	107	+	Zufsp
chr13	15782399	15782400	StrawSepia0266-MS-1	107	+	Gli3	Gli3
chr8	72858029	72858030	StrawSepia0266-MS-1	107	-	Upf1	Upf1
chrX	81418059	81418060	StrawSepia0266-MS-1	107	-	Dmd
chr1	16589470	16589471	HoneydewSepia0245-MS-1	106	+	Ube2w
chr1	47885262	47885263	HoneydewSepia0251-MS-1	106	-
chr1	163078547	163078548	StrawSepia0266-MS-1	106	-	Ankrd45
chr15	25492243	25492244	StrawSepia0266-MS-1	106	-
chr17	30853346	30853347	StrawSepia0266-MS-1	106	-	Dnah8
chr2	59769515	59769516	HoneydewSepia0251-MS-1	106	-	Baz2b	Baz2b
chr8	48351973	48351974	HoneydewSepia0245-MS-1	106	-	Stox2	Stox2
chrX	106308200	106308201	HoneydewSepia0245-MS-1	106	+	Sh3bgrl	Sh3bgrl
chr1	68462224	68462225	HoneydewSepia0251-MS-1	105	+	Erbb4
chr10	28567797	28567798	StrawSepia0266-MS-1	105	-	Themis
chr9	60861734	60861735	HoneydewSepia0251-MS-1	105	+
chr1	161179754	161179755	HoneydewSepia0245-MS-1	104	-	Rfwd2
chr12	76457788	76457789	StrawSepia0266-MS-1	104	-	Rhoj
chr19	21272896	21272897	StrawSepia0266-MS-1	104	-
chr2	92778139	92778140	HoneydewSepia0251-MS-1	104	+	Syt13	Syt13
chr3	135110795	135110796	HoneydewSepia0251-MS-1	104	-	Ube2d3
chr5	136719303	136719304	HoneydewSepia0251-MS-1	104	-	Sh2b2	Sh2b2
chr7	75212648	75212649	HoneydewSepia0245-MS-1	104	-	Igf1r
chr8	98325868	98325869	StrawSepia0266-MS-1	104	+	Cnot1
chr8	109822326	109822327	StrawSepia0266-MS-1	104	-	Mir5098|Nfat5
chr8	110349341	110349342	HoneyDewSepia0232-MS-2	104	+
chrX	19974922	19974923	HoneydewSepia0251-MS-1	104	+	Rp2h	Rp2h
chr1	48566506	48566507	StrawSepia0266-MS-1	103	-
chr1	71416354	71416355	StrawSepia0266-MS-1	103	-	Abca12	Abca12
chr11	52844654	52844655	HoneydewSepia0251-MS-1	103	-	Fstl4
chr12	65734933	65734934	HoneydewSepia0251-MS-1	103	+
chr12	89726877	89726878	StrawSepia0266-MS-1	103	-
chr15	70635988	70635989	HoneyDewSepia0232-MS-2	103	-
chr17	94914164	94914165	StrawSepia0266-MS-1	103	+
chr9	44726503	44726504	StrawSepia0266-MS-1	103	+	Atp5l
chr13	102804230	102804231	StrawSepia0266-MS-1	102	-
chr15	87647565	87647566	HoneydewSepia0251-MS-1	102	+
chr3	107964872	107964873	HoneydewSepia0251-MS-1	102	+
chr7	121416869	121416870	HoneydewSepia0245-MS-1	102	-	Psma1	Psma1
chr8	34775747	34775748	StrawSepia0266-MS-1	102	-	Gsr
chr9	63055823	63055824	HoneydewSepia0245-MS-1	102	+	Map2k5
chr1	30926742	30926743	HoneydewSepia0251-MS-1	101	-
chr1	34872694	34872695	HoneydewSepia0245-MS-1	101	-	Fam168b	Fam168b
chr1	42219430	42219431	StrawSepia0266-MS-1	101	+
chr1	138918610	138918611	StrawSepia0266-MS-1	101	+
chr10	14405516	14405517	StrawSepia0266-MS-1	101	+	Vta1
chr17	5144062	5144063	StrawSepia0266-MS-1	101	+	Arid1b	Arid1b
chr17	32388315	32388316	StrawSepia0266-MS-1	101	+	Brd4
chr18	29079559	29079560	StrawSepia0266-MS-1	101	-	4930474G06Rik
chr2	132279232	132279233	StrawSepia0266-MS-1	101	-
chr3	109185916	109185917	HoneydewSepia0251-MS-1	101	-	Vav3
chr6	16683603	16683604	HoneydewSepia0245-MS-1	101	+
chr7	119952831	119952832	HoneydewSepia0245-MS-1	101	-	Tead1
chrX	140316690	140316691	HoneydewSepia0245-MS-1	101	+	Dcx
chr2	52532549	52532550	HoneydewSepia0245-MS-1	100	-
chr3	79431229	79431230	HoneydewSepia0245-MS-1	100	-	Etfdh	Etfdh
chr4	18767305	18767306	StrawSepia0266-MS-1	100	+
chr4	40931421	40931422	HoneydewSepia0245-MS-1	100	-	Nfx1
chr9	17291040	17291041	StrawSepia0266-MS-1	100	-
chr1	147504411	147504412	StrawSepia0266-MS-1	99	+
chr16	4871807	4871808	HoneydewSepia0251-MS-1	99	-
chr3	87741951	87741952	HoneydewSepia0251-MS-1	99	-	Isg20l2
chr8	125508808	125508809	StrawSepia0266-MS-1	99	+	Ankrd11
chr14	84014832	84014833	HoneyDewSepia0232-MS-1	98	-
chr4	100051589	100051590	StrawSepia0266-MS-1	98	+	Ror1	Ror1
chr6	31164358	31164359	StrawSepia0266-MS-1	98	+	Lincpint
chr7	82868409	82868410	StrawSepia0266-MS-1	98	+	Akap13	Akap13
chr8	82683866	82683867	StrawSepia0266-MS-1	98	+
chr1	126739933	126739934	StrawSepia0266-MS-1	97	-
chr1	159090962	159090963	HoneydewSepia0251-MS-1	97	-	Rasal2	Rasal2
chr13	15519209	15519210	HoneydewSepia0251-MS-1	97	-
chr13	85372679	85372680	StrawSepia0266-MS-1	97	-	Rasa1	Rasa1
chr4	101975954	101975955	StrawSepia0266-MS-1	97	+	Pde4b	Pde4b
chr6	134484179	134484180	StrawSepia0266-MS-1	97	-	Lrp6	Lrp6
chr1	30834786	30834787	HoneydewSepia0245-MS-1	96	+
chr1	105194272	105194273	HoneydewSepia0245-MS-1	96	+
chr1	145420135	145420136	HoneydewSepia0251-MS-1	96	-
chr1	153523118	153523119	HoneydewSepia0245-MS-1	96	-	Fam129a
chr1	166939794	166939795	StrawSepia0266-MS-1	96	-
chr11	18423375	18423376	StrawSepia0266-MS-1	96	-
chr13	51999923	51999924	StrawSepia0266-MS-1	96	-
chr13	54351940	54351941	StrawSepia0266-MS-1	96	+
chr2	42348472	42348473	StrawSepia0266-MS-1	96	-	Lrp1b	Lrp1b
chr2	154640446	154640447	HoneydewSepia0251-MS-1	96	-	Raly
chr3	78957187	78957188	HoneydewSepia0251-MS-1	96	-
chr4	142738468	142738469	StrawSepia0266-MS-1	96	+	Prdm2
chr5	36954019	36954020	StrawSepia0266-MS-1	96	+	D5Ertd579e
chr5	139729949	139729950	StrawSepia0266-MS-1	96	+	Get4	Get4
chr6	19153550	19153551	StrawSepia0266-MS-1	96	+
chr6	139108865	139108866	StrawSepia0266-MS-1	96	+
chr8	100922078	100922079	HoneydewSepia0245-MS-1	96	-
chr8	108159465	108159466	StrawSepia0266-MS-1	96	-
chr12	74855077	74855078	StrawSepia0266-MS-1	95	-	Prkch
chr14	33115650	33115651	HoneydewSepia0245-MS-1	95	+
chr14	58268984	58268985	HoneydewSepia0251-MS-1	95	+	Xpo4
chr16	60212718	60212719	HoneydewSepia0245-MS-1	95	+	Epha6
chr2	88856274	88856275	HoneydewSepia0251-MS-1	95	+
chr3	108064021	108064022	HoneydewSepia0251-MS-1	95	-	Psma5
chr4	132637538	132637539	HoneydewSepia0251-MS-1	95	+
chr6	29307412	29307413	HoneydewSepia0251-MS-1	95	-	Calu
chrX	91606873	91606874	HoneydewSepia0245-MS-1	95	+
chr1	40048110	40048111	StrawSepia0266-MS-1	94	-	Map4k4
chr10	96210454	96210455	HoneydewSepia0251-MS-1	94	-
chr14	74120241	74120242	HoneydewSepia0251-MS-1	94	-
chr2	76216053	76216054	StrawSepia0266-MS-1	94	-	Rbm45
chr2	167798765	167798766	StrawSepia0266-MS-1	94	-	Ptpn1
chr3	55503579	55503580	HoneydewSepia0251-MS-1	94	-	Nbea	Nbea
chr4	141236720	141236721	HoneydewSepia0245-MS-1	94	-
chr5	72101021	72101022	HoneydewSepia0251-MS-1	94	+	Gabrb1	Gabrb1
chr7	91781748	91781749	StrawSepia0266-MS-1	94	+	Zfand6
chr1	4773707	4773708	StrawSepia0266-MS-1	93	-	Mrpl15	Mrpl15
chr1	17988842	17988843	HoneydewSepia0251-MS-1	93	-
chr1	67054871	67054872	HoneydewSepia0251-MS-1	93	+	Lancl1
chr1	80280374	80280375	StrawSepia0266-MS-1	93	-	Cul3	Cul3
chr10	89226216	89226217	HoneydewSepia0245-MS-1	93	-	Uhrf1bp1l
chr16	65312289	65312290	StrawSepia0266-MS-1	93	-
chr2	26321041	26321042	HoneydewSepia0245-MS-1	93	+	Notch1
chr4	154413594	154413595	HoneydewSepia0251-MS-1	93	-
chr6	40839372	40839373	StrawSepia0266-MS-1	93	-
chr6	72661164	72661165	StrawSepia0266-MS-1	93	+	Tcf7l1
chr8	120161352	120161353	StrawSepia0266-MS-1	93	+
chr1	14398293	14398294	HoneydewSepia0251-MS-1	92	-
chr1	26589683	26589684	HoneydewSepia0251-MS-1	92	+
chr1	66960742	66960743	HoneydewSepia0245-MS-1	92	+
chr1	133816445	133816446	StrawSepia0266-MS-1	92	+	Nucks1	Nucks1
chr1	143108556	143108557	HoneydewSepia0251-MS-1	92	-
chr12	92343641	92343642	HoneydewSepia0251-MS-1	92	+	Cep128
chr13	15640256	15640257	StrawSepia0266-MS-1	92	+	Gli3	Gli3
chr14	17041649	17041650	StrawSepia0266-MS-1	92	-
chr15	92672588	92672589	StrawSepia0266-MS-1	92	-
chr16	60083166	60083167	StrawSepia0266-MS-1	92	-	Epha6	Epha6
chr18	31108761	31108762	StrawSepia0266-MS-1	92	-
chr19	24678190	24678191	HoneydewSepia0245-MS-1	92	-
chr5	87236762	87236763	HoneydewSepia0251-MS-1	92	-	Ythdc1
chr5	124124676	124124677	StrawSepia0266-MS-1	92	-	Clip1	Clip1
chr6	80197813	80197814	HoneydewSepia0251-MS-1	92	-	Lrrtm4
chr9	24930137	24930138	StrawSepia0266-MS-1	92	+	Herpud2
chr1	68473500	68473501	StrawSepia0266-MS-1	91	-	Erbb4	Erbb4
chr1	107564162	107564163	StrawSepia0266-MS-1	91	-	2310035C23Rik
chr1	145140786	145140787	HoneydewSepia0251-MS-1	91	+
chr10	110378180	110378181	StrawSepia0266-MS-1	91	-
chr15	66798011	66798012	StrawSepia0266-MS-1	91	+	Ndrg1
chr16	33835808	33835809	StrawSepia0266-MS-1	91	-	Itgb5
chr16	50702139	50702140	StrawSepia0266-MS-1	91	-
chr18	32370330	32370331	StrawSepia0266-MS-1	91	+	Map3k2	Map3k2
chr18	71889209	71889210	StrawSepia0266-MS-1	91	+	Dcc
chr2	105285257	105285258	StrawSepia0266-MS-1	91	+
chr3	82671210	82671211	StrawSepia0266-MS-1	91	+	Rbm46
chr8	6708002	6708003	StrawSepia0266-MS-1	91	+
chr1	69291446	69291447	HoneyDewSepia0232-MS-2	90	-
chr10	90399685	90399686	HoneydewSepia0245-MS-1	90	+	Anks1b	Anks1b
chr11	19329195	19329196	StrawSepia0266-MS-1	90	+
chr11	22724716	22724717	StrawSepia0266-MS-1	90	-
chr11	59518400	59518401	StrawSepia0266-MS-1	90	+	Mprip	Mprip
chr11	106720969	106720970	StrawSepia0266-MS-1	90	+	Smurf2
chr13	14021811	14021812	StrawSepia0266-MS-1	90	+
chr19	31605586	31605587	HoneyDewSepia0232-MS-2	90	+	Prkg1
chr2	25873524	25873525	HoneydewSepia0245-MS-1	90	-	Ubac1	Ubac1
chr2	69827801	69827802	HoneydewSepia0251-MS-1	90	-	Ubr3
chr2	73033943	73033944	HoneydewSepia0245-MS-1	90	+	Ola1
chr4	81992757	81992758	HoneydewSepia0251-MS-1	90	-	Nfib	Nfib
chr5	4008345	4008346	HoneydewSepia0245-MS-1	90	+	Akap9	Akap9
chr6	69916634	69916635	HoneydewSepia0251-MS-1	90	-
chr9	57380681	57380682	StrawSepia0266-MS-1	90	+
chrX	100371172	100371173	HoneydewSepia0251-MS-1	90	-
chr1	30243674	30243675	StrawSepia0266-MS-1	89	+
chr1	59913450	59913451	StrawSepia0269-MS-2	89	+	Bmpr2	Bmpr2
chr1	160582092	160582093	HoneydewSepia0251-MS-1	89	-	Astn1
chr1	191078366	191078367	StrawSepia0266-MS-1	89	-	Kcnk2	Kcnk2
chr12	48042534	48042535	StrawSepia0266-MS-1	89	+
chr19	15641606	15641607	StrawSepia0266-MS-1	89	+
chr4	98779841	98779842	HoneydewSepia0251-MS-1	89	-	Dock7	Dock7
chr4	98867011	98867012	StrawSepia0266-MS-1	89	+	Atg4c	Atg4c
chr4	132960748	132960749	HoneydewSepia0245-MS-1	89	+	Slc9a1	Slc9a1
chr6	137239253	137239254	HoneydewSepia0251-MS-1	89	-	Ptpro
chr8	72490947	72490948	HoneydewSepia0245-MS-1	89	-	Gatad2a	Gatad2a
chr8	79779506	79779507	StrawSepia0266-MS-1	89	-	Arhgap10	Arhgap10
chr1	140059527	140059528	StrawSepia0266-MS-1	88	-	Ptprc	Ptprc
chr1	140940441	140940442	StrawSepia0266-MS-1	88	-	Dennd1b
chr1	178014233	178014234	StrawSepia0266-MS-1	88	+	Pld5
chr17	89141016	89141017	HoneydewSepia0251-MS-1	88	+	Lhcgr
chr2	91722751	91722752	StrawSepia0266-MS-1	88	+	Ambra1	Ambra1
chr3	11731230	11731231	HoneydewSepia0251-MS-1	88	-
chr3	152027433	152027434	StrawSepia0266-MS-1	88	-	Usp33
chr4	98941364	98941365	HoneydewSepia0245-MS-1	88	+
chr7	91029572	91029573	StrawSepia0266-MS-1	88	+	Mesdc1
chr8	35002130	35002131	StrawSepia0266-MS-1	88	-	Rbpms	Rbpms
chr8	115255471	115255472	StrawSepia0266-MS-1	88	+	Cntnap4	Cntnap4
chrX	41586519	41586520	HoneydewSepia0245-MS-1	88	+
chr1	34995292	34995293	StrawSepia0266-MS-1	87	-
chr1	80273085	80273086	StrawSepia0266-MS-1	87	-	Cul3	Cul3
chr1	117633655	117633656	HoneydewSepia0251-MS-1	87	-	Cntnap5a
chr1	177979629	177979630	HoneydewSepia0251-MS-1	87	+	Pld5
chr15	66976836	66976837	HoneydewSepia0251-MS-1	87	-	St3gal1	St3gal1
chr2	77775806	77775807	HoneydewSepia0251-MS-1	87	-	Cwc22	Cwc22
chr2	158239474	158239475	StrawSepia0266-MS-1	87	+	Ralgapb	Ralgapb
chr6	55798993	55798994	HoneydewSepia0251-MS-1	87	+	Ccdc129	Ccdc129
chr7	52641590	52641591	HoneydewSepia0251-MS-1	87	+	Snrnp70
chr8	39134107	39134108	HoneydewSepia0245-MS-1	87	-	Sgcz	Sgcz
chr1	60598023	60598024	HoneydewSepia0251-MS-1	86	-	Raph1	Raph1
chr1	66812403	66812404	HoneydewSepia0251-MS-1	86	-	Kansl1l	Kansl1l
chr1	145448094	145448095	StrawSepia0266-MS-1	86	+
chr1	182672616	182672617	StrawSepia0266-MS-1	86	-	Acbd3
chr10	116507901	116507902	StrawSepia0266-MS-1	86	-	Frs2	Frs2
chr11	15914644	15914645	StrawSepia0266-MS-1	86	-
chr11	93759116	93759117	StrawSepia0266-MS-1	86	+	Mbtd1	Mbtd1
chr12	78581482	78581483	StrawSepia0266-MS-1	86	-
chr14	122670656	122670657	StrawSepia0266-MS-1	86	+	Clybl	Clybl
chr15	42936470	42936471	HoneydewSepia0251-MS-1	86	-	Rspo2	Rspo2
chr17	8989898	8989899	HoneyDewSepia0232-MS-2	86	-	Pde10a
chr4	22899934	22899935	HoneydewSepia0245-MS-1	86	-
chr4	38590740	38590741	StrawSepia0266-MS-1	86	-
chr6	144682485	144682486	HoneydewSepia0251-MS-1	86	-
chr7	80664801	80664802	HoneydewSepia0251-MS-1	86	+	Chd2
chr7	144019889	144019890	HoneydewSepia0251-MS-1	86	-
chr9	59484331	59484332	StrawSepia0269-MS-2	86	-	Parp6
chr9	77070576	77070577	HoneydewSepia0251-MS-1	86	+	Mlip
chr1	98196019	98196020	StrawSepia0266-MS-1	85	+
chr1	99610623	99610624	StrawSepia0266-MS-1	85	+	Ppip5k2
chr1	119091425	119091426	StrawSepia0266-MS-1	85	-
chr1	196597151	196597152	StrawSepia0266-MS-1	85	+	Plxna2	Plxna2
chr11	11591658	11591659	HoneydewSepia0251-MS-1	85	-	Ikzf1
chr13	26447635	26447636	HoneydewSepia0251-MS-1	85	-
chr14	79931842	79931843	StrawSepia0266-MS-1	85	-	Elf1
chr4	78821390	78821391	StrawSepia0266-MS-1	85	+
chr4	129998968	129998969	StrawSepia0266-MS-1	85	+	Zcchc17
chr7	82879026	82879027	HoneydewSepia0245-MS-1	85	+	Akap13	Akap13
chr8	47855050	47855051	StrawSepia0266-MS-1	85	+	Irf2	Irf2
chr9	26639342	26639343	StrawSepia0266-MS-1	85	-	Glb1l3	Glb1l3
chr1	68432769	68432770	HoneydewSepia0251-MS-1	84	+	Erbb4
chr1	80583400	80583401	StrawSepia0266-MS-1	84	-	Dock10	Dock10
chr1	112711133	112711134	StrawSepia0266-MS-1	84	-
chr10	13536487	13536488	StrawSepia0266-MS-1	84	+	Aig1
chr11	46096805	46096806	StrawSepia0266-MS-1	84	-	Cyfip2	Cyfip2
chr12	71990852	71990853	HoneydewSepia0251-MS-1	84	+	Frmd6	Frmd6
chr14	116204447	116204448	StrawSepia0266-MS-1	84	+	Gpc5	Gpc5
chr15	39463724	39463725	HoneydewSepia0251-MS-1	84	-	Rims2
chr2	7459764	7459765	StrawSepia0266-MS-1	84	-
chr2	77431583	77431584	HoneydewSepia0245-MS-1	84	+	Zfp385b
chr3	16796841	16796842	StrawSepia0266-MS-1	84	-
chr3	152080903	152080904	StrawSepia0266-MS-1	84	-	Zzz3
chr6	67488326	67488327	HoneydewSepia0251-MS-1	84	-
chr6	92113623	92113624	HoneydewSepia0251-MS-1	84	-	Nr2c2
chr7	98903173	98903174	HoneydewSepia0251-MS-1	84	+	Dlg2	Dlg2
chr8	55656443	55656444	HoneydewSepia0251-MS-1	84	+	Asb5	Asb5
chr9	30698425	30698426	StrawSepia0266-MS-1	84	+
chrX	40710601	40710602	HoneydewSepia0245-MS-1	84	-
chrX	130344635	130344636	StrawSepia0266-MS-1	84	+
chr1	127321195	127321196	HoneydewSepia0245-MS-1	83	+	Actr3
chr1	136146031	136146032	HoneydewSepia0245-MS-1	83	-
chr1	161170396	161170397	StrawSepia0266-MS-1	83	-	Rfwd2
chr13	75455768	75455769	StrawSepia0266-MS-1	83	-
chr14	116734663	116734664	HoneydewSepia0251-MS-1	83	-	Gpc5
chr16	91844924	91844925	StrawSepia0266-MS-1	83	-	Itsn1
chr17	30211868	30211869	HoneydewSepia0251-MS-1	83	+	Zfand3	Zfand3
chr17	33773389	33773390	HoneydewSepia0245-MS-1	83	-
chr19	28549268	28549269	HoneydewSepia0251-MS-1	83	-	Glis3	Glis3
chr19	41352208	41352209	StrawSepia0266-MS-1	83	-	Pik3ap1	Pik3ap1
chr4	92212307	92212308	StrawSepia0266-MS-1	83	-
chr6	25525631	25525632	StrawSepia0266-MS-1	83	+
chr6	142708844	142708845	StrawSepia0266-MS-1	83	+	Cmas	Cmas
chr7	57444378	57444379	HoneydewSepia0251-MS-1	83	+	Nell1	Nell1
chr7	140753985	140753986	StrawSepia0266-MS-1	83	+
chr8	87306772	87306773	HoneydewSepia0251-MS-1	83	+	Nfix
chrX	153834905	153834906	HoneydewSepia0251-MS-1	83	+	Phex
chr1	139180387	139180388	HoneydewSepia0251-MS-1	82	-
chr1	140000488	140000489	StrawSepia0266-MS-1	82	+	Ptprc
chr1	175360218	175360219	StrawSepia0266-MS-1	82	-	Aim2
chr10	116424799	116424800	HoneydewSepia0251-MS-1	82	+	Best3	Best3
chr11	56381083	56381084	HoneydewSepia0245-MS-1	82	-
chr13	24832697	24832698	StrawSepia0266-MS-1	82	+
chr13	57998053	57998054	HoneydewSepia0251-MS-1	82	-	Spock1	Spock1
chr2	102817147	102817148	HoneydewSepia0245-MS-1	82	+
chr3	114528381	114528382	HoneyDewSepia0232-MS-2	82	+
chr4	68148674	68148675	StrawSepia0266-MS-1	82	-
chr5	43985481	43985482	HoneydewSepia0251-MS-1	82	-	C1qtnf7
chr5	145319326	145319327	HoneydewSepia0245-MS-1	82	-
chr8	61369418	61369419	StrawSepia0266-MS-1	82	-	Galntl6	Galntl6
chr9	32557873	32557874	StrawSepia0266-MS-1	82	-	Ets1
chr9	74940967	74940968	StrawSepia0266-MS-1	82	+	Myo5a	Myo5a
chr9	105311694	105311695	HoneydewSepia0251-MS-1	82	+
chr1	13838260	13838261	StrawSepia0266-MS-1	81	-
chr1	128979102	128979103	HoneydewSepia0245-MS-1	81	+
chr1	140881996	140881997	StrawSepia0266-MS-1	81	+	Dennd1b	Dennd1b
chr1	153895426	153895427	HoneydewSepia0245-MS-1	81	-	1700025G04Rik	1700025G04Rik
chr10	115943258	115943259	StrawSepia0266-MS-1	81	+	Cnot2
chr11	65076960	65076961	StrawSepia0266-MS-1	81	-	Myocd	Myocd
chr11	109244851	109244852	HoneydewSepia0251-MS-1	81	-	Gna13
chr12	4621170	4621171	StrawSepia0266-MS-1	81	-	Itsn2
chr12	17290420	17290421	StrawSepia0266-MS-1	81	-	Pdia6
chr14	67682357	67682358	StrawSepia0266-MS-1	81	+	Ppp2r2a
chr17	80451727	80451728	StrawSepia0266-MS-1	81	+	Hnrnpll
chr4	51196104	51196105	HoneydewSepia0251-MS-1	81	+
chr7	116316286	116316287	HoneydewSepia0251-MS-1	81	-	Lmo1	Lmo1
chr9	95922665	95922666	StrawSepia0266-MS-1	81	+	Xrn1	Xrn1
chr9	123462534	123462535	HoneydewSepia0251-MS-1	81	-	Sacm1l
chrX	155826825	155826826	StrawSepia0266-MS-1	81	-
chr1	30680667	30680668	StrawSepia0266-MS-1	80	-
chr1	44005716	44005717	StrawSepia0266-MS-1	80	-	Tpp2
chr1	150383500	150383501	StrawSepia0266-MS-1	80	+
chr1	189157767	189157768	HoneydewSepia0251-MS-1	80	+	Gpatch2	Gpatch2
chr10	101110172	101110173	HoneydewSepia0251-MS-1	80	+
chr11	97104173	97104174	HoneydewSepia0251-MS-1	80	-	Npepps	Npepps
chr12	107529737	107529738	HoneydewSepia0251-MS-1	80	-
chr13	46939028	46939029	HoneydewSepia0251-MS-1	80	+	Kif13a
chr15	16712580	16712581	HoneydewSepia0251-MS-1	80	-	Cdh9
chr15	93347999	93348000	StrawSepia0266-MS-1	80	+	Prickle1
chr16	69171645	69171646	StrawSepia0266-MS-1	80	+
chr18	10119937	10119938	HoneydewSepia0245-MS-1	80	+	Rock1
chr3	48649359	48649360	StrawSepia0266-MS-1	80	-
chr4	84975417	84975418	StrawSepia0266-MS-1	80	+	Sh3gl2	Sh3gl2
chr5	34979987	34979988	HoneydewSepia0245-MS-1	80	-
chr5	35376264	35376265	StrawSepia0266-MS-1	80	+
chr6	73586392	73586393	HoneydewSepia0245-MS-1	80	-
chr6	74757581	74757582	StrawSepia0266-MS-1	80	+
chr6	90336781	90336782	StrawSepia0266-MS-1	80	-	Zxdc
chr7	60228382	60228383	StrawSepia0266-MS-1	80	+
chr9	47648166	47648167	HoneydewSepia0245-MS-1	80	-	Cadm1
chrX	110395917	110395918	HoneydewSepia0245-MS-1	80	+
chrX	156164202	156164203	StrawSepia0266-MS-1	80	-	Sh3kbp1
chr1	30895563	30895564	StrawSepia0266-MS-1	79	+	Phf3
chr1	44649744	44649745	StrawSepia0266-MS-1	79	+	Gulp1	Gulp1
chr1	117966440	117966441	HoneydewSepia0251-MS-1	79	-	Cntnap5a
chr1	183674826	183674827	HoneydewSepia0251-MS-1	79	+
chr13	26502537	26502538	HoneydewSepia0245-MS-1	79	+
chr13	57966102	57966103	StrawSepia0266-MS-1	79	+	Spock1
chr13	103868113	103868114	HoneydewSepia0251-MS-1	79	-	Mast4	Mast4
chr3	104465144	104465145	StrawSepia0266-MS-1	79	-
chr4	127468335	127468336	HoneydewSepia0251-MS-1	79	+
chr4	129400385	129400386	StrawSepia0266-MS-1	79	+	Khdrbs1
chr6	25179044	25179045	HoneydewSepia0251-MS-1	79	-
chr6	58395392	58395393	StrawSepia0266-MS-1	79	+
chr7	66538555	66538556	HoneydewSepia0251-MS-1	79	-	A230073K19Rik|Ube3a	A230073K19Rik
chr7	126458676	126458677	HoneydewSepia0251-MS-1	79	+
chr8	41580295	41580296	StrawSepia0266-MS-1	79	+	Cnot7
chr8	105250921	105250922	HoneydewSepia0251-MS-1	79	+	Cdh11
chr8	129849212	129849213	HoneydewSepia0251-MS-1	79	-	Pard3
chr1	30036667	30036668	HoneydewSepia0251-MS-1	78	-
chr1	34810334	34810335	HoneyDewSepia0232-MS-2	78	-
chr1	40030555	40030556	HoneydewSepia0251-MS-1	78	+	Map4k4	Map4k4
chr1	42347469	42347470	StrawSepia0266-MS-1	78	-
chr1	126170741	126170742	StrawSepia0266-MS-1	78	-
chr1	140466416	140466417	HoneydewSepia0251-MS-1	78	+	Nek7
chr1	148073275	148073276	StrawSepia0266-MS-1	78	+
chr10	79519462	79519463	StrawSepia0266-MS-1	78	-
chr11	13504812	13504813	HoneydewSepia0251-MS-1	78	-
chr12	62829596	62829597	HoneydewSepia0251-MS-1	78	+	Lrfn5	Lrfn5
chr17	44576444	44576445	StrawSepia0266-MS-1	78	+
chr2	12169109	12169110	StrawSepia0266-MS-1	78	-	Itga8	Itga8
chr2	20791889	20791890	StrawSepia0266-MS-1	78	+	Arhgap21
chr2	44946818	44946819	HoneydewSepia0251-MS-1	78	+	Zeb2
chr2	99862084	99862085	StrawSepia0266-MS-1	78	-
chr3	81368696	81368697	StrawSepia0266-MS-1	78	+
chr4	34770925	34770926	HoneydewSepia0251-MS-1	78	-	Zfp292	Zfp292
chr4	97151645	97151646	StrawSepia0266-MS-1	78	-
chr1	54477528	54477529	StrawSepia0266-MS-1	77	+	Gtf3c3
chr1	167903625	167903626	StrawSepia0266-MS-1	77	-	Pou2f1	Pou2f1
chr10	14156384	14156385	StrawSepia0266-MS-1	77	+	Adgrg6
chr10	46735363	46735364	StrawSepia0266-MS-1	77	+
chr11	39891089	39891090	StrawSepia0266-MS-1	77	+
chr12	80070024	80070025	StrawSepia0266-MS-1	77	+	Tmem229b
chr12	84898827	84898828	StrawSepia0266-MS-1	77	+	Zfyve1
chr14	39587424	39587425	HoneydewSepia0251-MS-1	77	+	Nrg3
chr15	3521614	3521615	StrawSepia0266-MS-1	77	-	Ghr	Ghr
chr15	16520696	16520697	StrawSepia0266-MS-1	77	+
chr16	59229483	59229484	StrawSepia0266-MS-1	77	+
chr17	26411863	26411864	HoneydewSepia0251-MS-1	77	+	Luc7l	Luc7l
chr17	67788709	67788710	HoneydewSepia0251-MS-1	77	-
chr19	32877096	32877097	StrawSepia0266-MS-1	77	-	Pten
chr2	120866956	120866957	HoneydewSepia0251-MS-1	77	+
chr5	51864523	51864524	HoneydewSepia0251-MS-1	77	+	Ppargc1a
chr8	25106495	25106496	HoneydewSepia0245-MS-1	77	+	Zmat4	Zmat4
chr8	43017547	43017548	StrawSepia0266-MS-1	77	+	2810404M03Rik	2810404M03Rik
chr8	68427849	68427850	StrawSepia0266-MS-1	77	-	2018-03-01
chr1	8405484	8405485	StrawSepia0266-MS-1	76	-	Sntg1	Sntg1
chr1	47550057	47550058	StrawSepia0266-MS-1	76	+
chr1	48318564	48318565	HoneyDewSepia0232-MS-2	76	-
chr1	57923224	57923225	HoneydewSepia0245-MS-1	76	+	Spats2l	Spats2l
chr1	59007546	59007547	StrawSepia0266-MS-1	76	-	Trak2	Trak2
chr1	60608193	60608194	StrawSepia0266-MS-1	76	-	Raph1	Raph1
chr1	193957963	193957964	HoneydewSepia0251-MS-1	76	+	Rcor3
chr10	76553218	76553219	HoneydewSepia0245-MS-1	76	+	Col18a1
chr11	84999886	84999887	StrawSepia0266-MS-1	76	-
chr14	111097672	111097673	HoneydewSepia0245-MS-1	76	+
chr14	119736456	119736457	StrawSepia0266-MS-1	76	+	Hs6st3	Hs6st3
chr15	13761896	13761897	StrawSepia0266-MS-1	76	+
chr16	54649051	54649052	StrawSepia0266-MS-1	76	-
chr18	69303887	69303888	StrawSepia0266-MS-1	76	+
chr19	54074488	54074489	HoneydewSepia0251-MS-1	76	+	Shoc2	Shoc2
chr2	60432803	60432804	StrawSepia0266-MS-1	76	+
chr2	114741021	114741022	HoneydewSepia0251-MS-1	76	-
chr4	38410150	38410151	StrawSepia0266-MS-1	76	+
chr5	112723274	112723275	StrawSepia0266-MS-1	76	-	Tpst2
chr5	124840791	124840792	StrawSepia0266-MS-1	76	+	Sbno1
chr7	66559265	66559266	StrawSepia0266-MS-1	76	+	Ube3a	Ube3a
chr8	32044447	32044448	HoneydewSepia0251-MS-1	76	+
chr9	58495606	58495607	HoneydewSepia0245-MS-1	76	+	Nptn	Nptn
chr1	56399948	56399949	HoneydewSepia0251-MS-1	75	-
chr1	133250493	133250494	StrawSepia0266-MS-1	75	-	Srgap2	Srgap2
chr1	189241296	189241297	HoneydewSepia0251-MS-1	75	+
chr10	128687217	128687218	HoneydewSepia0245-MS-1	75	-
chr12	58495091	58495092	HoneydewSepia0251-MS-1	75	-	Mipol1
chr13	14571319	14571320	StrawSepia0266-MS-1	75	-	Hecw1	Hecw1
chr13	78600451	78600452	StrawSepia0266-MS-1	75	+
chr14	67763444	67763445	HoneydewSepia0251-MS-1	75	+
chr15	32098648	32098649	HoneydewSepia0251-MS-1	75	+
chr15	48388744	48388745	HoneyDewSepia0232-MS-2	75	+	Csmd3
chr17	37632977	37632978	HoneydewSepia0251-MS-1	75	+	Olfr110	Olfr110
chr17	75150276	75150277	HoneydewSepia0245-MS-1	75	+	Ttc27	Ttc27
chr18	19464152	19464153	StrawSepia0266-MS-1	75	+
chr18	71499377	71499378	StrawSepia0266-MS-1	75	-	Dcc	Dcc
chr19	10791520	10791521	HoneydewSepia0245-MS-1	75	-
chr2	165648201	165648202	StrawSepia0266-MS-1	75	-	Zmynd8	Zmynd8
chr3	32016976	32016977	StrawSepia0266-MS-1	75	-	Kcnmb2
chr3	150258384	150258385	HoneydewSepia0251-MS-1	75	-
chr4	105992784	105992785	StrawSepia0266-MS-1	75	+	Usp24	Usp24
chr9	29806860	29806861	StrawSepia0266-MS-1	75	+
chr1	22829802	22829803	HoneydewSepia0245-MS-1	74	-
chr1	34317120	34317121	StrawSepia0266-MS-1	74	-	Dst
chr1	44024244	44024245	StrawSepia0266-MS-1	74	+	Tpp2	Tpp2
chr1	47601327	47601328	HoneydewSepia0245-MS-1	74	-
chr1	64966684	64966685	HoneydewSepia0251-MS-1	74	-	Plekhm3	Plekhm3
chr1	72254047	72254048	HoneydewSepia0245-MS-1	74	+	Mreg
chr1	110722695	110722696	StrawSepia0266-MS-1	74	+
chr1	170320342	170320343	HoneydewSepia0251-MS-1	74	-	Pbx1	Pbx1
chr1	177420360	177420361	StrawSepia0266-MS-1	74	+	Rgs7
chr10	13466210	13466211	StrawSepia0266-MS-1	74	+	Aig1
chr11	66626636	66626637	StrawSepia0266-MS-1	74	+
chr11	102369145	102369146	HoneydewSepia0245-MS-1	74	-	Gpatch8	Gpatch8
chr11	104904341	104904342	HoneydewSepia0251-MS-1	74	+
chr13	42131587	42131588	StrawSepia0266-MS-1	74	+
chr13	59606718	59606719	StrawSepia0266-MS-1	74	-	Agtpbp1	Agtpbp1
chr15	40371040	40371041	HoneydewSepia0251-MS-1	74	+
chr15	47530964	47530965	HoneydewSepia0251-MS-1	74	+	Csmd3
chr15	69690656	69690657	StrawSepia0266-MS-1	74	+
chr3	32161536	32161537	HoneydewSepia0245-MS-1	74	+
chr5	139857223	139857224	StrawSepia0266-MS-1	74	-	3110082I17Rik|Gpr146	3110082I17Rik
chr7	90666563	90666564	HoneydewSepia0251-MS-1	74	+
chr7	141856757	141856758	StrawSepia0266-MS-1	74	-
chr9	27006968	27006969	HoneydewSepia0251-MS-1	74	+
chr9	101048143	101048144	HoneydewSepia0251-MS-1	74	+	Ppp2r3a
chr1	4827941	4827942	HoneydewSepia0251-MS-1	73	-	Lypla1
chr1	26861928	26861929	HoneydewSepia0245-MS-1	73	-
chr1	90182954	90182955	StrawSepia0266-MS-1	73	-
chr1	96452891	96452892	StrawSepia0266-MS-1	73	+
chr1	170992012	170992013	HoneydewSepia0245-MS-1	73	+
chr1	174006744	174006745	HoneydewSepia0245-MS-1	73	+	Ncstn
chr1	196500360	196500361	HoneydewSepia0251-MS-1	73	-	Plxna2
chr11	87344721	87344722	HoneydewSepia0251-MS-1	73	-	Tex14
chr14	38526178	38526179	StrawSepia0266-MS-1	73	-
chr15	13689854	13689855	StrawSepia0266-MS-1	73	+
chr15	82769155	82769156	StrawSepia0266-MS-1	73	-
chr17	13110755	13110756	StrawSepia0266-MS-1	73	+	Tcp1	Tcp1
chr19	36811040	36811041	HoneydewSepia0245-MS-1	73	+	Ppp1r3c
chr2	7141278	7141279	HoneydewSepia0245-MS-1	73	-	Celf2	Celf2
chr2	159186325	159186326	StrawSepia0266-MS-1	73	-
chr3	30931426	30931427	HoneydewSepia0251-MS-1	73	-	Prkci
chr4	90077569	90077570	HoneydewSepia0245-MS-1	73	-
chr5	5192145	5192146	StrawSepia0266-MS-1	73	-	Cdk14	Cdk14
chr5	28083381	28083382	StrawSepia0266-MS-1	73	+	Paxip1
chr5	105954187	105954188	HoneydewSepia0245-MS-1	73	+	Lrrc8c	Lrrc8c
chr5	117130591	117130592	HoneyDewSepia0232-MS-2	73	-
chr5	145609758	145609759	HoneydewSepia0251-MS-1	73	+	Trrap	Trrap
chr8	93989094	93989095	StrawSepia0266-MS-1	73	-	Fto
chr9	18127670	18127671	HoneydewSepia0251-MS-1	73	+	Naalad2
chrX	96755148	96755149	StrawSepia0266-MS-1	73	-
chr1	16587954	16587955	StrawSepia0266-MS-1	72	+	Ube2w
chr1	25656086	25656087	HoneydewSepia0251-MS-1	72	+	Adgrb3
chr1	25797980	25797981	StrawSepia0266-MS-1	72	+	Adgrb3
chr1	80291394	80291395	StrawSepia0266-MS-1	72	-	Cul3	Cul3
chr1	120706671	120706672	HoneydewSepia0251-MS-1	72	-
chr1	157049218	157049219	StrawSepia0266-MS-1	72	-	Stx6
chr1	173999486	173999487	HoneydewSepia0245-MS-1	72	+	Ncstn
chr1	178528813	178528814	HoneydewSepia0251-MS-1	72	-
chr1	187071264	187071265	StrawSepia0266-MS-1	72	-	Rab3gap2
chr11	82470112	82470113	HoneydewSepia0251-MS-1	72	+
chr13	9955073	9955074	HoneydewSepia0251-MS-1	72	+	Chrm3
chr13	97953087	97953088	StrawSepia0266-MS-1	72	-	Hexb	Hexb
chr14	37083833	37083834	HoneydewSepia0245-MS-1	72	-
chr14	85381268	85381269	HoneydewSepia0251-MS-1	72	-
chr15	102311819	102311820	StrawSepia0266-MS-1	72	-	Pcbp2
chr16	73409522	73409523	StrawSepia0266-MS-1	72	+
chr17	56166992	56166993	StrawSepia0266-MS-1	72	+	Sh3gl1
chr18	6772599	6772600	StrawSepia0266-MS-1	72	-	Rab18
chr2	97947196	97947197	StrawSepia0266-MS-1	72	-
chr3	51102170	51102171	StrawSepia0266-MS-1	72	+	Elf2
chr4	137510342	137510343	HoneydewSepia0251-MS-1	72	-	Ece1
chr5	74437160	74437161	StrawSepia0266-MS-1	72	-	Usp46	Usp46
chr5	92040743	92040744	HoneydewSepia0251-MS-1	72	+	Parm1	Parm1
chr7	29191726	29191727	HoneydewSepia0251-MS-1	72	+	Samd4b
chr7	120510099	120510100	StrawSepia0266-MS-1	72	-	Btbd10	Btbd10
chrX	113999818	113999819	HoneydewSepia0245-MS-1	72	-
chr1	58502797	58502798	HoneydewSepia0245-MS-1	71	+
chr1	64626646	64626647	HoneydewSepia0245-MS-1	71	-	Creb1
chr1	77970792	77970793	HoneydewSepia0245-MS-1	71	+
chr1	149552312	149552313	HoneyDewSepia0232-MS-2	71	+
chr1	162205933	162205934	StrawSepia0266-MS-1	71	-	Rabgap1l	Rabgap1l
chr1	183220350	183220351	HoneydewSepia0245-MS-1	71	+
chr1	191673148	191673149	HoneydewSepia0251-MS-1	71	+	Ptpn14	Ptpn14
chr10	8079270	8079271	HoneydewSepia0251-MS-1	71	+	Ust
chr10	93481888	93481889	HoneydewSepia0251-MS-1	71	-	Vezt	Vezt
chr11	116048426	116048427	StrawSepia0266-MS-1	71	-	Acox1	Acox1
chr12	37861355	37861356	HoneydewSepia0251-MS-1	71	-	Meox2
chr12	94356005	94356006	HoneydewSepia0245-MS-1	71	+
chr15	34029789	34029790	HoneydewSepia0251-MS-1	71	+	Mtdh	Mtdh
chr15	37746411	37746412	StrawSepia0266-MS-1	71	-
chr16	8862096	8862097	HoneydewSepia0251-MS-1	71	+
chr18	6794674	6794675	HoneyDewSepia0232-MS-2	71	-
chr19	7365598	7365599	HoneydewSepia0245-MS-1	71	+	Mark2
chr4	64293665	64293666	StrawSepia0266-MS-1	71	+
chr4	100460317	100460318	HoneydewSepia0245-MS-1	71	-	Cachd1
chr4	126032506	126032507	StrawSepia0269-MS-2	71	+	Ago3
chr5	134865999	134866000	HoneydewSepia0245-MS-1	71	-	Gtf2ird1	Gtf2ird1
chr7	59045893	59045894	StrawSepia0266-MS-1	71	+
chr9	62784307	62784308	HoneydewSepia0251-MS-1	71	-	Pias1	Pias1
chrX	16892774	16892775	StrawSepia0266-MS-1	71	+	Efhc2
chr1	23866749	23866750	StrawSepia0266-MS-1	70	+	Smap1
chr1	183884104	183884105	HoneydewSepia0251-MS-1	70	+	Enah
chr12	3270249	3270250	StrawSepia0266-MS-1	70	-	Rab10	Rab10
chr12	48325851	48325852	StrawSepia0266-MS-1	70	-
chr14	32983352	32983353	StrawSepia0266-MS-1	70	-	Ncoa4
chr15	48188476	48188477	HoneydewSepia0251-MS-1	70	-	Csmd3	Csmd3
chr16	21810045	21810046	StrawSepia0266-MS-1	70	+
chr16	32220009	32220010	HoneydewSepia0251-MS-1	70	+
chr16	77168085	77168086	StrawSepia0266-MS-1	70	+
chr17	28358986	28358987	StrawSepia0266-MS-1	70	+	Def6|Mir5098	Def6
chr17	83813928	83813929	HoneydewSepia0251-MS-1	70	+	Eml4	Eml4
chr2	48789322	48789323	HoneydewSepia0245-MS-1	70	-	Orc4	Orc4
chr3	17340868	17340869	StrawSepia0266-MS-1	70	+
chr3	31150990	31150991	HoneydewSepia0251-MS-1	70	+	Slc7a14
chr4	80050811	80050812	StrawSepia0266-MS-1	70	-
chr4	140261833	140261834	HoneydewSepia0251-MS-1	70	+	Rcc2	Rcc2
chr4	151215897	151215898	HoneydewSepia0251-MS-1	70	-	Camta1	Camta1
chr5	106552575	106552576	HoneydewSepia0251-MS-1	70	-
chr5	148100158	148100159	StrawSepia0266-MS-1	70	-
chr6	45834669	45834670	StrawSepia0266-MS-1	70	+	Cntnap2	Cntnap2
chr6	46432938	46432939	StrawSepia0266-MS-1	70	+	Cntnap2	Cntnap2
chr7	91808409	91808410	StrawSepia0266-MS-1	70	-	Zfand6	Zfand6
chr7	99069141	99069142	StrawSepia0266-MS-1	70	-	Dlg2
chr7	108342885	108342886	StrawSepia0266-MS-1	70	-	Fchsd2
chr8	7131520	7131521	StrawSepia0266-MS-1	70	+
chr8	97212778	97212779	StrawSepia0266-MS-1	70	+	Pllp
chr8	125235336	125235337	StrawSepia0266-MS-1	70	+
chr8	128384389	128384390	HoneydewSepia0245-MS-1	70	+	Pcnxl2
chr9	83990184	83990185	HoneydewSepia0245-MS-1	70	+	Bckdhb	Bckdhb
chr9	114748014	114748015	StrawSepia0266-MS-1	70	-	Cmtm8	Cmtm8
chrX	45431815	45431816	StrawSepia0266-MS-1	70	-
chrX	111507063	111507064	StrawSepia0266-MS-1	70	+
chr1	11100785	11100786	HoneydewSepia0251-MS-1	69	+	Prex2	Prex2
chr1	56050930	56050931	StrawSepia0266-MS-1	69	-
chr1	59724723	59724724	StrawSepia0266-MS-1	69	-	Sumo1	Sumo1
chr1	114818940	114818941	HoneydewSepia0245-MS-1	69	-
chr1	117739941	117739942	HoneydewSepia0251-MS-1	69	-	Cntnap5a
chr12	60285722	60285723	StrawSepia0266-MS-1	69	-	Ctage5
chr13	70906166	70906167	HoneydewSepia0251-MS-1	69	-	Adamts16	Adamts16
chr14	9429902	9429903	HoneydewSepia0245-MS-1	69	+	4930452B06Rik
chr14	90361121	90361122	StrawSepia0266-MS-1	69	+
chr16	11651591	11651592	StrawSepia0266-MS-1	69	+	Snx29	Snx29
chr18	18501515	18501516	StrawSepia0266-MS-1	69	+
chr18	26834089	26834090	StrawSepia0266-MS-1	69	-
chr18	47360114	47360115	HoneydewSepia0251-MS-1	69	+
chr2	102200341	102200342	StrawSepia0266-MS-1	69	+	Trim44
chr4	46009057	46009058	StrawSepia0266-MS-1	69	-	Tdrd7
chr4	63103591	63103592	HoneydewSepia0245-MS-1	69	-	Whrn	Whrn
chr5	127248023	127248024	HoneydewSepia0245-MS-1	69	-
chr7	11034119	11034120	HoneydewSepia0251-MS-1	69	-
chr7	120288819	120288820	StrawSepia0266-MS-1	69	+
chr7	125729262	125729263	StrawSepia0266-MS-1	69	+
chr7	129367034	129367035	StrawSepia0266-MS-1	69	-
chr7	148598183	148598184	StrawSepia0266-MS-1	69	+	Pddc1
chr9	44308575	44308576	HoneydewSepia0245-MS-1	69	-	Bcl9l
chr9	64892686	64892687	StrawSepia0266-MS-1	69	-	Dpp8
chrX	159856563	159856564	HoneydewSepia0245-MS-1	69	+
chr1	6611839	6611840	StrawSepia0266-MS-1	68	+	St18	St18
chr1	10452098	10452099	HoneydewSepia0251-MS-1	68	-	Cpa6	Cpa6
chr1	34867513	34867514	HoneydewSepia0245-MS-1	68	-	Arhgef4
chr1	74294258	74294259	StrawSepia0266-MS-1	68	-	Arpc2
chr1	104301432	104301433	StrawSepia0266-MS-1	68	-
chr1	110624324	110624325	StrawSepia0266-MS-1	68	-
chr1	143566254	143566255	StrawSepia0266-MS-1	68	+
chr1	174046656	174046657	StrawSepia0266-MS-1	68	-	Copa
chr1	188867980	188867981	HoneydewSepia0245-MS-1	68	+
chr1	191234049	191234050	StrawSepia0266-MS-1	68	+
chr11	80268351	80268352	StrawSepia0266-MS-1	68	-	Psmd11
chr11	86545810	86545811	HoneyDewSepia0232-MS-2	68	+	Cltc
chr11	119346649	119346650	HoneydewSepia0251-MS-1	68	+
chr12	93925336	93925337	HoneydewSepia0251-MS-1	68	+
chr12	95403184	95403185	HoneydewSepia0245-MS-1	68	-
chr13	31040401	31040402	StrawSepia0266-MS-1	68	-	Exoc2	Exoc2
chr13	41769304	41769305	StrawSepia0266-MS-1	68	+
chr14	39878071	39878072	StrawSepia0266-MS-1	68	-	Nrg3	Nrg3
chr14	48876971	48876972	HoneydewSepia0251-MS-1	68	-	Peli2
chr14	72938123	72938124	StrawSepia0266-MS-1	68	-	Fndc3a	Fndc3a
chr16	20101827	20101828	HoneydewSepia0251-MS-1	68	-	Klhl24
chr17	29558104	29558105	StrawSepia0266-MS-1	68	+
chr18	90280693	90280694	HoneydewSepia0245-MS-1	68	+
chr19	56107441	56107442	StrawSepia0266-MS-1	68	+
chr2	78977488	78977489	StrawSepia0266-MS-1	68	-
chr2	131816549	131816550	HoneydewSepia0251-MS-1	68	+
chr3	105933448	105933449	HoneydewSepia0251-MS-1	68	+	Chia1	Chia1
chr3	131341468	131341469	HoneyDewSepia0232-MS-2	68	-
chr3	132380466	132380467	HoneydewSepia0251-MS-1	68	-	Tbck
chr4	44163596	44163597	StrawSepia0266-MS-1	68	+	Rnf38
chr4	65040002	65040003	HoneydewSepia0245-MS-1	68	+
chr5	86702257	86702258	HoneydewSepia0251-MS-1	68	-	Tmprss11c	Tmprss11c
chr5	148405864	148405865	StrawSepia0266-MS-1	68	+	Flt1
chr7	6097218	6097219	StrawSepia0266-MS-1	68	-	Zfp787	Zfp787
chr8	26813650	26813651	HoneydewSepia0251-MS-1	68	-	Whsc1l1
chr8	30507185	30507186	HoneydewSepia0245-MS-1	68	+
chr8	75404588	75404589	StrawSepia0266-MS-1	68	+	Large
chr8	127167224	127167225	HoneydewSepia0245-MS-1	68	+	2310022B05Rik
chrX	22159448	22159449	StrawSepia0266-MS-1	68	-
chr1	17388864	17388865	HoneydewSepia0251-MS-1	67	+
chr1	21535484	21535485	HoneydewSepia0251-MS-1	67	-	Kcnq5	Kcnq5
chr1	119077327	119077328	StrawSepia0266-MS-1	67	+
chr1	133355092	133355093	StrawSepia0266-MS-1	67	+	Srgap2
chr1	134271721	134271722	HoneydewSepia0251-MS-1	67	+	Tmcc2
chr1	137494347	137494348	StrawSepia0266-MS-1	67	+
chr1	140916861	140916862	HoneydewSepia0251-MS-1	67	-	Dennd1b
chr1	149560161	149560162	HoneyDewSepia0232-MS-2	67	-
chr11	8380633	8380634	StrawSepia0266-MS-1	67	-	Tns3	Tns3
chr11	50695225	50695226	HoneydewSepia0251-MS-1	67	-	Zfp454	Zfp454
chr12	79882191	79882192	StrawSepia0266-MS-1	67	-	Mpp5
chr12	117595811	117595812	StrawSepia0266-MS-1	67	-	Esyt2
chr13	9114150	9114151	HoneydewSepia0251-MS-1	67	-	Larp4b
chr14	78892283	78892284	StrawSepia0266-MS-1	67	+	Akap11
chr14	122813914	122813915	StrawSepia0266-MS-1	67	+	Gm5089
chr15	11223601	11223602	HoneydewSepia0245-MS-1	67	+	Adamts12	Adamts12
chr15	85676343	85676344	HoneydewSepia0245-MS-1	67	-	Ttc38
chr19	56989944	56989945	HoneydewSepia0251-MS-1	67	+	Afap1l2
chr2	60917714	60917715	StrawSepia0266-MS-1	67	-
chr2	144429133	144429134	HoneydewSepia0251-MS-1	67	-	Dtd1
chr2	153175156	153175157	StrawSepia0266-MS-1	67	+	Asxl1	Asxl1
chr3	108079795	108079796	StrawSepia0266-MS-1	67	-	Psma5
chr3	116562035	116562036	StrawSepia0266-MS-1	67	-
chr3	117440823	117440824	StrawSepia0266-MS-1	67	-
chr3	125320683	125320684	HoneydewSepia0251-MS-1	67	+	Ndst4	Ndst4
chr4	15735957	15735958	HoneydewSepia0245-MS-1	67	-
chr5	3779995	3779996	StrawSepia0266-MS-1	67	+	Ankib1
chr5	129867555	129867556	StrawSepia0266-MS-1	67	+
chr5	144445884	144445885	HoneydewSepia0251-MS-1	67	+	Cyth3	Cyth3
chr6	106698255	106698256	StrawSepia0266-MS-1	67	+	Il5ra
chr7	47119185	47119186	HoneydewSepia0245-MS-1	67	+
chr7	82814655	82814656	StrawSepia0266-MS-1	67	+	Akap13	Akap13
chr9	9964267	9964268	StrawSepia0266-MS-1	67	+	Cntn5
chrX	50352925	50352926	StrawSepia0266-MS-1	67	-	Hprt
chr1	59897373	59897374	HoneydewSepia0245-MS-1	66	-	Bmpr2
chr1	130056847	130056848	StrawSepia0266-MS-1	66	+	R3hdm1	R3hdm1
chr1	144716909	144716910	StrawSepia0266-MS-1	66	+
chr1	153702250	153702251	HoneydewSepia0251-MS-1	66	-
chr1	161209392	161209393	StrawSepia0266-MS-1	66	-	Rfwd2
chr1	190853891	190853892	StrawSepia0266-MS-1	66	-
chr10	129386370	129386371	HoneydewSepia0251-MS-1	66	+
chr11	82703640	82703641	HoneydewSepia0251-MS-1	66	+	Rad51d
chr13	49526863	49526864	HoneydewSepia0251-MS-1	66	+	Ippk	Ippk
chr13	86683990	86683991	StrawSepia0266-MS-1	66	-
chr13	115888520	115888521	StrawSepia0266-MS-1	66	+	Itga1
chr14	31891369	31891370	StrawSepia0266-MS-1	66	-	Pbrm1
chr14	79874160	79874161	StrawSepia0266-MS-1	66	+	Wbp4
chr15	83817965	83817966	HoneydewSepia0245-MS-1	66	+	Efcab6
chr15	88542882	88542883	HoneydewSepia0245-MS-1	66	+	Brd1
chr16	19981367	19981368	StrawSepia0266-MS-1	66	-	Klhl6	Klhl6
chr16	24653374	24653375	StrawSepia0266-MS-1	66	-	Lpp
chr16	72697764	72697765	HoneydewSepia0245-MS-1	66	-	Robo1
chr2	35072615	35072616	HoneydewSepia0251-MS-1	66	+
chr2	119839468	119839469	StrawSepia0266-MS-1	66	-	Mapkbp1
chr6	11288420	11288421	HoneydewSepia0245-MS-1	66	+
chr7	73306029	73306030	HoneydewSepia0251-MS-1	66	-	Chsy1
chr8	81911084	81911085	HoneydewSepia0251-MS-1	66	+	Smad1
chr8	119507887	119507888	StrawSepia0266-MS-1	66	-	Gcsh	Gcsh
chr9	40016734	40016735	HoneydewSepia0245-MS-1	66	-	Zfp202
chr9	81099427	81099428	HoneyDewSepia0232-MS-2	66	+
chr9	91791451	91791452	StrawSepia0266-MS-1	66	-
chr1	23887969	23887970	StrawSepia0266-MS-1	65	-	Smap1	Smap1
chr1	27479262	27479263	StrawSepia0266-MS-1	65	-
chr1	53399745	53399746	HoneydewSepia0245-MS-1	65	+
chr1	77623883	77623884	StrawSepia0266-MS-1	65	-
chr1	142781137	142781138	StrawSepia0266-MS-1	65	-
chr1	172397990	172397991	StrawSepia0266-MS-1	65	-	Nos1ap	Nos1ap
chr11	3071888	3071889	HoneydewSepia0245-MS-1	65	+	Sfi1
chr11	63603342	63603343	StrawSepia0266-MS-1	65	-
chr11	72443222	72443223	StrawSepia0266-MS-1	65	-	Ube2g1
chr12	79854457	79854458	StrawSepia0266-MS-1	65	+	Mpp5	Mpp5
chr13	28258834	28258835	StrawSepia0266-MS-1	65	+
chr15	77058882	77058883	StrawSepia0266-MS-1	65	+	Rbfox2
chr18	38110293	38110294	StrawSepia0266-MS-1	65	+	Hdac3
chr2	38818355	38818356	StrawSepia0266-MS-1	65	-
chr2	49348521	49348522	StrawSepia0266-MS-1	65	-	Epc2
chr3	112465361	112465362	StrawSepia0266-MS-1	65	-
chr3	117229485	117229486	HoneydewSepia0245-MS-1	65	-
chr4	8677996	8677997	HoneydewSepia0245-MS-1	65	+	Chd7	Chd7
chr4	17883843	17883844	StrawSepia0266-MS-1	65	+	Mmp16	Mmp16
chr4	50298737	50298738	StrawSepia0266-MS-1	65	-
chr4	69852671	69852672	HoneydewSepia0251-MS-1	65	-
chr5	28016954	28016955	StrawSepia0266-MS-1	65	-	Dpp6
chr5	28214401	28214402	HoneydewSepia0251-MS-1	65	-
chr5	76329769	76329770	StrawSepia0266-MS-1	65	-	Kdr	Kdr
chr5	131303381	131303382	StrawSepia0266-MS-1	65	-	Caln1
chr7	72297424	72297425	StrawSepia0266-MS-1	65	-	Fam189a1	Fam189a1
chr7	117830861	117830862	StrawSepia0266-MS-1	65	-
chr7	147822083	147822084	StrawSepia0266-MS-1	65	+
chr1	66825072	66825073	StrawSepia0266-MS-1	64	+	Kansl1l
chr1	72432354	72432355	StrawSepia0266-MS-1	64	-	Xrcc5
chr1	80320776	80320777	HoneydewSepia0251-MS-1	64	+	Cul3
chr1	93290773	93290774	StrawSepia0269-MS-2	64	+	Ilkap
chr1	115124083	115124084	StrawSepia0266-MS-1	64	+
chr1	137490796	137490797	StrawSepia0269-MS-2	64	+
chr1	140940650	140940651	StrawSepia0266-MS-1	64	+	Dennd1b	Dennd1b
chr1	147677563	147677564	StrawSepia0266-MS-1	64	+
chr1	147744119	147744120	StrawSepia0266-MS-1	64	-
chr1	179719306	179719307	HoneydewSepia0245-MS-1	64	-	Adss	Adss
chr10	74617845	74617846	StrawSepia0266-MS-1	64	-	Bcr
chr11	37924804	37924805	HoneydewSepia0245-MS-1	64	+
chr11	64752796	64752797	HoneydewSepia0251-MS-1	64	+
chr13	105872581	105872582	HoneydewSepia0245-MS-1	64	-	4933425L06Rik
chr14	21323781	21323782	StrawSepia0266-MS-1	64	+	Ppp3cb
chr14	21753082	21753083	StrawSepia0266-MS-1	64	-	Vcl
chr14	71063345	71063346	StrawSepia0266-MS-1	64	+	Xpo7
chr15	44912096	44912097	StrawSepia0266-MS-1	64	-
chr15	66738598	66738599	StrawSepia0266-MS-1	64	-	Wisp1
chr15	88897241	88897242	HoneydewSepia0251-MS-1	64	+	Panx2	Panx2
chr16	4106407	4106408	HoneydewSepia0245-MS-1	64	-	Crebbp	Crebbp
chr16	47881547	47881548	StrawSepia0266-MS-1	64	+
chr18	60740164	60740165	StrawSepia0266-MS-1	64	+	Myoz3
chr19	7081255	7081256	HoneydewSepia0245-MS-1	64	-	Fermt3	Fermt3
chr2	26347760	26347761	HoneydewSepia0245-MS-1	64	+	Notch1
chr2	81310878	81310879	HoneydewSepia0251-MS-1	64	+
chr2	102146369	102146370	StrawSepia0266-MS-1	64	+	Trim44
chr2	104437715	104437716	StrawSepia0266-MS-1	64	-	Cstf3
chr2	134878208	134878209	HoneydewSepia0251-MS-1	64	+	Plcb1	Plcb1
chr3	5338673	5338674	StrawSepia0266-MS-1	64	-	Zfhx4
chr3	60401544	60401545	StrawSepia0266-MS-1	64	-	Mbnl1
chr4	34514887	34514888	StrawSepia0266-MS-1	64	+	Orc3
chr4	124364381	124364382	HoneydewSepia0245-MS-1	64	-	Utp11l	Utp11l
chr5	29313054	29313055	HoneydewSepia0245-MS-1	64	-
chr5	87246534	87246535	StrawSepia0266-MS-1	64	+	Ythdc1	Ythdc1
chr5	122947170	122947171	StrawSepia0266-MS-1	64	-	Atp2a2	Atp2a2
chr7	107772644	107772645	StrawSepia0266-MS-1	64	-	Rab6a
chr8	70339142	70339143	StrawSepia0269-MS-2	64	+	Psd3
chr8	74448386	74448387	StrawSepia0266-MS-1	64	+	Zfp617	Zfp617
chrX	137273127	137273128	StrawSepia0266-MS-1	64	+	Mid2	Mid2
chrX	162907091	162907092	StrawSepia0266-MS-1	64	-	Rab9	Rab9
chr1	34770215	34770216	HoneydewSepia0251-MS-1	63	-
chr1	105986610	105986611	StrawSepia0266-MS-1	63	-
chr1	118151520	118151521	HoneydewSepia0251-MS-1	63	-	Cntnap5a
chr1	120352126	120352127	StrawSepia0266-MS-1	63	+	Clasp1	Clasp1
chr1	129090123	129090124	HoneydewSepia0251-MS-1	63	-
chr1	144220351	144220352	StrawSepia0266-MS-1	63	-
chr1	147046500	147046501	HoneydewSepia0251-MS-1	63	-
chr10	30734119	30734120	HoneydewSepia0251-MS-1	63	+
chr10	114778100	114778101	StrawSepia0266-MS-1	63	+	Tmem19
chr11	32379458	32379459	StrawSepia0266-MS-1	63	+	Ubtd2	Ubtd2
chr11	44721740	44721741	HoneydewSepia0251-MS-1	63	+	Ebf1	Ebf1
chr11	89587629	89587630	StrawSepia0266-MS-1	63	+
chr11	107928984	107928985	HoneydewSepia0251-MS-1	63	+	Prkca
chr12	119526286	119526287	HoneydewSepia0245-MS-1	63	-	Sp4	Sp4
chr13	9150183	9150184	HoneydewSepia0251-MS-1	63	+	Larp4b	Larp4b
chr13	34718600	34718601	HoneydewSepia0251-MS-1	63	+
chr14	25804228	25804229	StrawSepia0266-MS-1	63	-
chr14	108924349	108924350	HoneydewSepia0251-MS-1	63	+
chr15	77656638	77656639	StrawSepia0266-MS-1	63	-	Myh9	Myh9
chr16	72232733	72232734	HoneydewSepia0251-MS-1	63	-	8030451O07Rik	8030451O07Rik
chr17	33714157	33714158	StrawSepia0266-MS-1	63	+	Myo1f	Myo1f
chr18	55088843	55088844	StrawSepia0266-MS-1	63	+	Zfp608
chr19	14716735	14716736	HoneydewSepia0251-MS-1	63	-
chr19	47712071	47712072	HoneydewSepia0251-MS-1	63	+	Slk	Slk
chr2	38458449	38458450	HoneydewSepia0245-MS-1	63	-	Psmb7	Psmb7
chr2	43014045	43014046	StrawSepia0266-MS-1	63	-
chr2	136174958	136174959	StrawSepia0266-MS-1	63	+	Pak7
chr2	138517218	138517219	HoneydewSepia0251-MS-1	63	-
chr2	155235965	155235966	StrawSepia0266-MS-1	63	+	Ncoa6
chr3	143822747	143822748	HoneydewSepia0251-MS-1	63	-
chr4	65455333	65455334	StrawSepia0269-MS-2	63	+	Astn2
chr4	102459446	102459447	StrawSepia0266-MS-1	63	+	Sgip1	Sgip1
chr5	140427513	140427514	HoneydewSepia0245-MS-1	63	-	Elfn1
chr5	141959868	141959869	HoneydewSepia0245-MS-1	63	+	Sdk1	Sdk1
chr8	126761147	126761148	StrawSepia0266-MS-1	63	+	Galnt2	Galnt2
chr8	127504087	127504088	HoneydewSepia0245-MS-1	63	+
chr9	16310037	16310038	StrawSepia0266-MS-1	63	-
chr9	41968052	41968053	StrawSepia0269-MS-2	63	-
chr9	45668302	45668303	HoneydewSepia0245-MS-1	63	-	Bace1
chr9	118334428	118334429	StrawSepia0266-MS-1	63	-
chr1	8669556	8669557	HoneydewSepia0251-MS-1	62	+	Sntg1
chr1	18107700	18107701	HoneydewSepia0251-MS-1	62	+	Crisp4
chr1	40342739	40342740	StrawSepia0266-MS-1	62	-	Il1r1
chr1	110152622	110152623	StrawSepia0266-MS-1	62	-
chr1	119357023	119357024	StrawSepia0266-MS-1	62	+
chr1	120340292	120340293	StrawSepia0266-MS-1	62	-	Clasp1
chr1	148093316	148093317	HoneydewSepia0251-MS-1	62	-
chr1	153624355	153624356	HoneydewSepia0245-MS-1	62	-	Edem3
chr10	38824594	38824595	HoneydewSepia0251-MS-1	62	-	Lama4
chr10	41247860	41247861	HoneydewSepia0245-MS-1	62	+	Cd164	Cd164
chr10	101860053	101860054	StrawSepia0266-MS-1	62	-
chr10	116804258	116804259	StrawSepia0266-MS-1	62	-	Cpsf6	Cpsf6
chr11	8205167	8205168	StrawSepia0266-MS-1	62	-
chr11	86540451	86540452	StrawSepia0266-MS-1	62	-	Cltc	Cltc
chr12	53610038	53610039	StrawSepia0266-MS-1	62	+
chr14	63341425	63341426	HoneydewSepia0251-MS-1	62	-	Ints6	Ints6
chr14	108048689	108048690	StrawSepia0266-MS-1	62	-
chr15	63129161	63129162	HoneydewSepia0251-MS-1	62	-
chr15	73166911	73166912	StrawSepia0266-MS-1	62	+	Ptk2
chr16	25841613	25841614	HoneydewSepia0245-MS-1	62	-	Trp63
chr16	80512678	80512679	HoneydewSepia0251-MS-1	62	+
chr18	7903836	7903837	StrawSepia0266-MS-1	62	-	Wac
chr18	27856916	27856917	HoneydewSepia0251-MS-1	62	+
chr18	30477687	30477688	HoneydewSepia0251-MS-1	62	-	Pik3c3
chr2	86974165	86974166	HoneydewSepia0245-MS-1	62	+
chr3	47871742	47871743	StrawSepia0266-MS-1	62	-
chr3	57209605	57209606	StrawSepia0266-MS-1	62	+
chr3	95127231	95127232	StrawSepia0266-MS-1	62	+	Cers2	Cers2
chr3	126202313	126202314	StrawSepia0266-MS-1	62	+
chr5	24891424	24891425	StrawSepia0266-MS-1	62	+	Kmt2c
chr6	17226847	17226848	HoneydewSepia0251-MS-1	62	+
chr6	50461069	50461070	StrawSepia0266-MS-1	62	-
chr7	108277815	108277816	StrawSepia0266-MS-1	62	-	Fchsd2
chr8	23740143	23740144	StrawSepia0266-MS-1	62	+	Polb
chr8	92924055	92924056	StrawSepia0266-MS-1	62	+
chr8	108190023	108190024	StrawSepia0266-MS-1	62	+	Ctcf	Ctcf
chr9	25096900	25096901	StrawSepia0266-MS-1	62	-	2018-09-07
chr9	29876536	29876537	StrawSepia0266-MS-1	62	+
chr9	113605856	113605857	StrawSepia0266-MS-1	62	-	Pdcd6ip	Pdcd6ip
chr9	117002136	117002137	StrawSepia0266-MS-1	62	+	Rbms3
chrX	107823491	107823492	HoneydewSepia0245-MS-1	62	-
chr1	26834666	26834667	StrawSepia0266-MS-1	61	+
chr1	27228057	27228058	HoneydewSepia0251-MS-1	61	+
chr1	90116222	90116223	HoneydewSepia0251-MS-1	61	-	Ugt1a1|Ugt1a10|Ugt1a2|Ugt1a5|Ugt1a6a|Ugt1a7c|Ugt1a9
chr1	110393581	110393582	StrawSepia0266-MS-1	61	+
chr1	117599220	117599221	StrawSepia0266-MS-1	61	-	Cntnap5a
chr1	134332319	134332320	StrawSepia0266-MS-1	61	-	Dstyk
chr1	139981258	139981259	StrawSepia0266-MS-1	61	+	Ptprc
chr1	146619837	146619838	HoneydewSepia0245-MS-1	61	+	Rgs18
chr11	44483522	44483523	StrawSepia0266-MS-1	61	-	Ebf1
chr11	77178405	77178406	StrawSepia0266-MS-1	61	-	Ssh2
chr11	119704662	119704663	HoneydewSepia0251-MS-1	61	+	Rptor	Rptor
chr14	69185909	69185910	StrawSepia0266-MS-1	61	+	Adamdec1
chr14	82676701	82676702	StrawSepia0266-MS-1	61	+
chr16	97095398	97095399	HoneyDewSepia0232-MS-1	61	+	Dscam
chr19	11781772	11781773	StrawSepia0266-MS-1	61	-	Oosp3
chr19	23783641	23783642	StrawSepia0266-MS-1	61	-	Ptar1
chr19	28485835	28485836	HoneydewSepia0251-MS-1	61	+	Glis3
chr2	103323987	103323988	StrawSepia0266-MS-1	61	-	Cat	Cat
chr3	81195270	81195271	HoneydewSepia0251-MS-1	61	+
chr7	124830182	124830183	StrawSepia0266-MS-1	61	-
chr8	26770877	26770878	StrawSepia0266-MS-1	61	+	Whsc1l1	Whsc1l1
chr8	104364498	104364499	HoneydewSepia0245-MS-1	61	-
chr8	108220342	108220343	StrawSepia0266-MS-1	61	+	Rltpr	Rltpr
chr8	109833671	109833672	StrawSepia0266-MS-1	61	+	Mir5098|Nfat5	Mir5098|Nfat5
chr9	32977280	32977281	StrawSepia0266-MS-1	61	-
chr9	111027407	111027408	HoneydewSepia0245-MS-1	61	+	Lrrfip2	Lrrfip2
chrX	105864744	105864745	StrawSepia0266-MS-1	61	-
chrX	128731572	128731573	StrawSepia0266-MS-1	61	-
chr1	32595000	32595001	StrawSepia0266-MS-1	60	-	Khdrbs2
chr1	99644734	99644735	HoneydewSepia0251-MS-1	60	+	Ppip5k2
chr1	118899165	118899166	HoneydewSepia0251-MS-1	60	-
chr1	123199595	123199596	HoneydewSepia0245-MS-1	60	+
chr1	129307546	129307547	HoneydewSepia0245-MS-1	60	-	Mgat5
chr1	131398666	131398667	StrawSepia0266-MS-1	60	-	Thsd7b
chr10	98408726	98408727	HoneydewSepia0245-MS-1	60	+	Atp2b1	Atp2b1
chr10	119612156	119612157	StrawSepia0266-MS-1	60	-	Irak3	Irak3
chr10	122237132	122237133	HoneydewSepia0245-MS-1	60	+	Ppm1h	Ppm1h
chr11	17340841	17340842	HoneydewSepia0251-MS-1	60	-
chr11	72534160	72534161	HoneydewSepia0251-MS-1	60	-	Ankfy1
chr12	8807387	8807388	StrawSepia0266-MS-1	60	+
chr12	68203699	68203700	StrawSepia0266-MS-1	60	+	Mdga2
chr13	14081046	14081047	HoneydewSepia0251-MS-1	60	+	B3galnt2	B3galnt2
chr13	41023920	41023921	StrawSepia0266-MS-1	60	+	Gcnt2	Gcnt2
chr13	94679930	94679931	HoneydewSepia0251-MS-1	60	-	Arsb
chr14	73234729	73234730	HoneydewSepia0251-MS-1	60	-
chr14	121324014	121324015	StrawSepia0266-MS-1	60	+	Ipo5	Ipo5
chr15	71655670	71655671	StrawSepia0266-MS-1	60	-	Col22a1	Col22a1
chr16	4146998	4146999	HoneydewSepia0245-MS-1	60	-	Crebbp	Crebbp
chr17	42415314	42415315	HoneydewSepia0251-MS-1	60	+
chr18	35765550	35765551	StrawSepia0266-MS-1	60	+	Paip2	Paip2
chr18	75682330	75682331	StrawSepia0266-MS-1	60	+	Ctif|Gm10532	Gm10532
chr19	34513796	34513797	StrawSepia0266-MS-1	60	-
chr2	43897012	43897013	StrawSepia0266-MS-1	60	-	Arhgap15
chr2	71713114	71713115	StrawSepia0266-MS-1	60	+	Pdk1	Pdk1
chr2	171883180	171883181	HoneydewSepia0245-MS-1	60	+
chr3	8196158	8196159	StrawSepia0266-MS-1	60	+
chr3	97847475	97847476	StrawSepia0266-MS-1	60	-	Notch2
chr4	37336943	37336944	HoneydewSepia0251-MS-1	60	+
chr4	126370144	126370145	HoneydewSepia0245-MS-1	60	+	Psmb2	Psmb2
chr4	127793896	127793897	HoneydewSepia0245-MS-1	60	+	Csmd2	Csmd2
chr5	137018938	137018939	StrawSepia0266-MS-1	60	+	Cux1
chr6	60924211	60924212	StrawSepia0266-MS-1	60	-	Mmrn1
chr6	79379284	79379285	StrawSepia0266-MS-1	60	+
chr7	106148937	106148938	StrawSepia0266-MS-1	60	-	Uvrag	Uvrag
chr8	51911902	51911903	StrawSepia0269-MS-2	60	+
chr9	46890789	46890790	HoneydewSepia0251-MS-1	60	-
chr9	110225128	110225129	HoneydewSepia0251-MS-1	60	+
chr1	25425015	25425016	StrawSepia0266-MS-1	59	+	Adgrb3
chr1	44995747	44995748	HoneydewSepia0245-MS-1	59	-
chr1	117130453	117130454	HoneydewSepia0251-MS-1	59	-
chr1	117973279	117973280	HoneydewSepia0251-MS-1	59	-	Cntnap5a
chr1	133766361	133766362	HoneydewSepia0251-MS-1	59	-	Rab29
chr1	155328240	155328241	StrawSepia0266-MS-1	59	+	Dhx9
chr1	157799249	157799250	StrawSepia0266-MS-1	59	-	Cep350	Cep350
chr1	161192889	161192890	StrawSepia0266-MS-1	59	+	Rfwd2	Rfwd2
chr10	127791100	127791101	StrawSepia0266-MS-1	59	-	Cs
chr11	79303958	79303959	StrawSepia0269-MS-2	59	+	Nf1	Nf1
chr12	28189068	28189069	StrawSepia0266-MS-1	59	+
chr12	28503287	28503288	HoneydewSepia0251-MS-1	59	-
chr12	31498262	31498263	StrawSepia0266-MS-1	59	-
chr12	45865973	45865974	StrawSepia0266-MS-1	59	-
chr12	47230420	47230421	HoneydewSepia0245-MS-1	59	-
chr13	15581495	15581496	HoneydewSepia0245-MS-1	59	+	Gli3	Gli3
chr13	53484390	53484391	HoneydewSepia0251-MS-1	59	-
chr14	14950418	14950419	HoneydewSepia0251-MS-1	59	+	Psmd6
chr15	31108488	31108489	HoneyDewSepia0232-MS-2	59	-
chr15	36704039	36704040	StrawSepia0266-MS-1	59	-	Ywhaz	Ywhaz
chr15	80677794	80677795	HoneydewSepia0251-MS-1	59	-	Tnrc6b
chr15	101425946	101425947	StrawSepia0266-MS-1	59	-	Krt85	Krt85
chr16	74868895	74868896	HoneydewSepia0251-MS-1	59	+
chr16	79035447	79035448	HoneydewSepia0251-MS-1	59	-	Tmprss15	Tmprss15
chr17	15903622	15903623	HoneydewSepia0251-MS-1	59	-	Chd1
chr18	42721394	42721395	HoneydewSepia0251-MS-1	59	-	Tcerg1
chr18	49285468	49285469	StrawSepia0266-MS-1	59	-
chr19	37147264	37147265	StrawSepia0266-MS-1	59	-	Cpeb3	Cpeb3
chr2	59639095	59639096	HoneydewSepia0251-MS-1	59	-	Tanc1
chr2	84443161	84443162	StrawSepia0266-MS-1	59	+	Ctnnd1
chr2	118223277	118223278	HoneydewSepia0251-MS-1	59	+	Eif2ak4	Eif2ak4
chr3	124556071	124556072	HoneydewSepia0251-MS-1	59	+
chr4	86015515	86015516	StrawSepia0266-MS-1	59	+	Adamtsl1	Adamtsl1
chr4	87651891	87651892	StrawSepia0266-MS-1	59	+	Mllt3
chr4	110468981	110468982	StrawSepia0266-MS-1	59	+	Agbl4	Agbl4
chr4	118141648	118141649	StrawSepia0266-MS-1	59	+
chr6	26300482	26300483	StrawSepia0266-MS-1	59	+
chr9	30928345	30928346	StrawSepia0266-MS-1	59	+	St14
chr9	60956301	60956302	StrawSepia0266-MS-1	59	+
chrX	117642730	117642731	HoneydewSepia0251-MS-1	59	-	Pcdh11x
chrX	142549032	142549033	StrawSepia0266-MS-1	59	+
chr1	81109204	81109205	HoneydewSepia0251-MS-1	58	+	Nyap2	Nyap2
chr1	89298502	89298503	StrawSepia0266-MS-1	58	-	Gigyf2
chr1	99688369	99688370	StrawSepia0266-MS-1	58	-	Gin1
chr1	115849037	115849038	HoneydewSepia0245-MS-1	58	-
chr1	122386497	122386498	StrawSepia0266-MS-1	58	+	Marco
chr1	174046877	174046878	HoneydewSepia0251-MS-1	58	-	Copa
chr1	177358737	177358738	StrawSepia0266-MS-1	58	-	Rgs7	Rgs7
chr1	196933196	196933197	StrawSepia0266-MS-1	58	+	Cr1l
chr10	106945641	106945642	StrawSepia0266-MS-1	58	-
chr12	87956499	87956500	HoneydewSepia0251-MS-1	58	+
chr12	103997098	103997099	StrawSepia0266-MS-1	58	+	Ubr7	Ubr7
chr14	90198533	90198534	StrawSepia0266-MS-1	58	+
chr15	78273871	78273872	StrawSepia0266-MS-1	58	+	Tmprss6
chr16	17842322	17842323	HoneydewSepia0251-MS-1	58	-	Dgcr2	Dgcr2
chr16	33027048	33027049	HoneydewSepia0245-MS-1	58	-	Iqcg	Iqcg
chr16	35723001	35723002	HoneydewSepia0245-MS-1	58	+	Dirc2
chr17	4248181	4248182	HoneydewSepia0251-MS-1	58	+
chr17	33794709	33794710	StrawSepia0266-MS-1	58	+	Hnrnpm
chr18	15056969	15056970	HoneydewSepia0245-MS-1	58	+	Taf4b	Taf4b
chr18	24435086	24435087	StrawSepia0266-MS-1	58	-	Galnt1
chr19	16334667	16334668	StrawSepia0266-MS-1	58	-	Gnaq
chr19	18581979	18581980	HoneydewSepia0251-MS-1	58	-
chr19	49596932	49596933	HoneydewSepia0251-MS-1	58	+
chr19	55851865	55851866	HoneydewSepia0251-MS-1	58	+	Tcf7l2	Tcf7l2
chr2	67064168	67064169	StrawSepia0266-MS-1	58	-
chr2	92039004	92039005	HoneydewSepia0245-MS-1	58	-	Phf21a
chr2	169235692	169235693	StrawSepia0266-MS-1	58	-
chr3	157946385	157946386	HoneydewSepia0251-MS-1	58	-	Lrrc7	Lrrc7
chr4	107731320	107731321	StrawSepia0266-MS-1	58	-	Scp2	Scp2
chr4	128411115	128411116	HoneydewSepia0251-MS-1	58	+	Phc2	Phc2
chr5	39236454	39236455	HoneydewSepia0251-MS-1	58	-	Clnk	Clnk
chr5	130581858	130581859	StrawSepia0266-MS-1	58	-	Tpst1
chr8	78712734	78712735	HoneydewSepia0251-MS-1	58	+
chr9	120848412	120848413	StrawSepia0266-MS-1	58	-	Ctnnb1
chrX	148077580	148077581	StrawSepia0266-MS-1	58	+
chrY	1821463	1821464	StrawSepia0269-MS-2	58	+
chr1	6226104	6226105	HoneydewSepia0251-MS-1	57	-	Rb1cc1
chr1	10192137	10192138	HoneydewSepia0251-MS-1	57	+	Arfgef1
chr1	17916672	17916673	StrawSepia0266-MS-1	57	-
chr1	38621143	38621144	HoneydewSepia0245-MS-1	57	+	Aff3
chr1	82228378	82228379	HoneydewSepia0251-MS-1	57	-
chr1	130978483	130978484	StrawSepia0266-MS-1	57	+
chr1	140046713	140046714	StrawSepia0266-MS-1	57	+	Ptprc
chr1	150116745	150116746	HoneydewSepia0251-MS-1	57	-
chr1	163538456	163538457	HoneydewSepia0251-MS-1	57	-
chr1	172581845	172581846	StrawSepia0266-MS-1	57	-	Olfml2b
chr10	52960421	52960422	StrawSepia0266-MS-1	57	+
chr10	88196568	88196569	HoneydewSepia0251-MS-1	57	-	Arl1
chr10	99559629	99559630	HoneydewSepia0251-MS-1	57	-	Kitl
chr10	104368533	104368534	StrawSepia0266-MS-1	57	-
chr10	120304528	120304529	StrawSepia0266-MS-1	57	+	Msrb3
chr11	93979665	93979666	HoneydewSepia0251-MS-1	57	+	Spag9	Spag9
chr11	100587162	100587163	HoneydewSepia0251-MS-1	57	+	Rab5c
chr12	101581191	101581192	HoneydewSepia0251-MS-1	57	-	Ttc7b	Ttc7b
chr12	120724462	120724463	StrawSepia0266-MS-1	57	-
chr13	18585847	18585848	HoneydewSepia0251-MS-1	57	+
chr13	31704049	31704050	StrawSepia0266-MS-1	57	-
chr14	28168642	28168643	StrawSepia0266-MS-1	57	+	Arhgef3	Arhgef3
chr15	12097257	12097258	StrawSepia0266-MS-1	57	+	Zfr	Zfr
chr15	36343811	36343812	HoneydewSepia0251-MS-1	57	+
chr15	51227371	51227372	StrawSepia0266-MS-1	57	-
chr16	17002328	17002329	StrawSepia0266-MS-1	57	-	Mapk1
chr16	88193579	88193580	HoneydewSepia0251-MS-1	57	-	Grik1	Grik1
chr18	50251104	50251105	StrawSepia0266-MS-1	57	+	Tnfaip8	Tnfaip8
chr2	96396300	96396301	HoneydewSepia0251-MS-1	57	-	Lrrc4c
chr3	30814581	30814582	StrawSepia0266-MS-1	57	+	Phc3
chr3	97735180	97735181	HoneydewSepia0251-MS-1	57	-	Gm5544
chr4	132727808	132727809	HoneydewSepia0251-MS-1	57	+	Wasf2	Wasf2
chr4	134376382	134376383	StrawSepia0266-MS-1	57	+	Tmem57
chr4	149974442	149974443	StrawSepia0266-MS-1	57	+	Rere	Rere
chr5	83742831	83742832	StrawSepia0266-MS-1	57	+	Tecrl
chr6	46057185	46057186	HoneydewSepia0251-MS-1	57	+	Cntnap2	Cntnap2
chr6	88145374	88145375	HoneydewSepia0251-MS-1	57	+
chr6	146698152	146698153	StrawSepia0266-MS-1	57	+	Stk38l	Stk38l
chr7	84052299	84052300	StrawSepia0266-MS-1	57	-	Agbl1
chr7	97305857	97305858	StrawSepia0266-MS-1	57	+	Picalm	Picalm
chr8	58230876	58230877	HoneydewSepia0245-MS-1	57	+
chrX	56003772	56003773	StrawSepia0266-MS-1	57	-
chrX	111284344	111284345	StrawSepia0266-MS-1	57	+
chr1	10200199	10200200	HoneydewSepia0251-MS-1	56	-	Arfgef1	Arfgef1
chr1	19748925	19748926	StrawSepia0266-MS-1	56	-
chr1	28862476	28862477	StrawSepia0266-MS-1	56	+
chr1	99552062	99552063	StrawSepia0266-MS-1	56	-	D1Ertd622e	D1Ertd622e
chr1	148953923	148953924	StrawSepia0266-MS-1	56	+
chr1	158554028	158554029	HoneyDewSepia0232-MS-2	56	+	Abl2	Abl2
chr11	111442304	111442305	StrawSepia0266-MS-1	56	+
chr12	60276323	60276324	HoneydewSepia0251-MS-1	56	-	Ctage5
chr12	118189504	118189505	HoneydewSepia0245-MS-1	56	-	Ptprn2
chr13	99547477	99547478	HoneydewSepia0251-MS-1	56	-	Fcho2	Fcho2
chr13	101395930	101395931	HoneydewSepia0251-MS-1	56	+	Rad17
chr16	44122983	44122984	HoneydewSepia0251-MS-1	56	-	Atp6v1a	Atp6v1a
chr17	29582212	29582213	HoneydewSepia0251-MS-1	56	-
chr17	71350324	71350325	HoneydewSepia0251-MS-1	56	+	Myl12a
chr18	71275285	71275286	StrawSepia0266-MS-1	56	-
chr18	75539574	75539575	HoneydewSepia0245-MS-1	56	-	Smad7
chr19	7548749	7548750	HoneydewSepia0251-MS-1	56	+	Rtn3
chr19	32766543	32766544	StrawSepia0266-MS-1	56	+	Atad1
chr2	31776822	31776823	StrawSepia0266-MS-1	56	+	Lamc3	Lamc3
chr2	63109333	63109334	StrawSepia0266-MS-1	56	-
chr2	151540014	151540015	StrawSepia0266-MS-1	56	+
chr3	14037431	14037432	StrawSepia0266-MS-1	56	-	Ralyl
chr3	32918608	32918609	StrawSepia0266-MS-1	56	+	Pex5l
chr3	132741758	132741759	StrawSepia0266-MS-1	56	+	Gstcd
chr4	95371804	95371805	StrawSepia0266-MS-1	56	-	Fggy
chr4	116298062	116298063	StrawSepia0266-MS-1	56	+	Nasp
chr4	123476363	123476364	StrawSepia0266-MS-1	56	-	Rhbdl2
chr5	57140720	57140721	StrawSepia0266-MS-1	56	+
chr5	142893579	142893580	StrawSepia0266-MS-1	56	+	Foxk1	Foxk1
chr6	65073800	65073801	StrawSepia0266-MS-1	56	-	Hpgds	Hpgds
chr7	56061248	56061249	HoneydewSepia0251-MS-1	56	-	Zdhhc13
chr7	93522535	93522536	StrawSepia0266-MS-1	56	+
chr9	95950831	95950832	StrawSepia0266-MS-1	56	-	Xrn1
chrX	162746526	162746527	HoneydewSepia0251-MS-1	56	+	Gpm6b	Gpm6b
chr1	11642833	11642834	StrawSepia0266-MS-1	55	-	A830018L16Rik
chr1	69107957	69107958	HoneydewSepia0251-MS-1	55	-	Erbb4	Erbb4
chr1	78046341	78046342	HoneydewSepia0251-MS-1	55	-
chr1	97766849	97766850	HoneydewSepia0251-MS-1	55	-
chr1	111437705	111437706	HoneydewSepia0251-MS-1	55	+
chr1	168594262	168594263	HoneydewSepia0251-MS-1	55	+	Fmo9
chr1	184264044	184264045	HoneydewSepia0251-MS-1	55	+	Fbxo28
chr10	4481492	4481493	HoneydewSepia0245-MS-1	55	-	Rgs17
chr10	100984514	100984515	StrawSepia0266-MS-1	55	+
chr11	27444213	27444214	StrawSepia0266-MS-1	55	+
chr11	37564869	37564870	StrawSepia0266-MS-1	55	-
chr12	27726111	27726112	HoneydewSepia0245-MS-1	55	-
chr13	85386713	85386714	StrawSepia0269-MS-2	55	-	Rasa1	Rasa1
chr15	19279627	19279628	StrawSepia0266-MS-1	55	+
chr16	13288092	13288093	HoneydewSepia0251-MS-1	55	+	Mkl2	Mkl2
chr16	68880046	68880047	HoneydewSepia0245-MS-1	55	-
chr16	90239676	90239677	StrawSepia0266-MS-1	55	-	Scaf4	Scaf4
chr19	32851303	32851304	StrawSepia0266-MS-1	55	-	Pten
chr2	46092621	46092622	HoneydewSepia0251-MS-1	55	-
chr2	103890837	103890838	HoneydewSepia0251-MS-1	55	-	Fbxo3
chr2	180404731	180404732	HoneydewSepia0245-MS-1	55	-	Dido1	Dido1
chr3	44362653	44362654	StrawSepia0266-MS-1	55	+
chr4	44854331	44854332	StrawSepia0266-MS-1	55	-	Zcchc7
chr4	82122193	82122194	HoneydewSepia0245-MS-1	55	+	Nfib
chr4	125219885	125219886	StrawSepia0266-MS-1	55	+	Grik3	Grik3
chr5	79695369	79695370	StrawSepia0266-MS-1	55	+
chr5	101616966	101616967	StrawSepia0269-MS-2	55	+
chr5	145457679	145457680	StrawSepia0266-MS-1	55	+
chr6	29732132	29732133	HoneydewSepia0251-MS-1	55	-	Ahcyl2
chr6	96176015	96176016	HoneydewSepia0245-MS-1	55	-	Fam19a1
chr7	35047311	35047312	StrawSepia0266-MS-1	55	-	4931406P16Rik	4931406P16Rik
chr7	35146001	35146002	StrawSepia0266-MS-1	55	-	Lsm14a	Lsm14a
chr7	76750035	76750036	StrawSepia0266-MS-1	55	+
chr7	83988367	83988368	HoneydewSepia0251-MS-1	55	+	Agbl1	Agbl1
chr7	123069871	123069872	StrawSepia0266-MS-1	55	+	Sox6
chr7	134679005	134679006	StrawSepia0266-MS-1	55	+	Srcap	Srcap
chr8	28875625	28875626	StrawSepia0266-MS-1	55	+
chr8	40026861	40026862	HoneydewSepia0251-MS-1	55	+
chr8	45780571	45780572	HoneydewSepia0251-MS-1	55	+
chr8	54233989	54233990	StrawSepia0269-MS-2	55	-
chr9	64568973	64568974	StrawSepia0266-MS-1	55	+	Rab11a
chrX	17692213	17692214	StrawSepia0266-MS-1	55	-
chrX	37960441	37960442	StrawSepia0266-MS-1	55	+
chrX	100683703	100683704	StrawSepia0266-MS-1	55	+
chr1	52510679	52510680	HoneydewSepia0245-MS-1	54	-
chr1	55112829	55112830	StrawSepia0266-MS-1	54	+	Coq10b	Coq10b
chr1	75304644	75304645	StrawSepia0266-MS-1	54	+
chr1	81055489	81055490	HoneydewSepia0251-MS-1	54	-
chr1	87704602	87704603	HoneyDewSepia0232-MS-2	54	+	Cab39	Cab39
chr1	109816023	109816024	HoneydewSepia0251-MS-1	54	-	D830032E09Rik
chr1	178702806	178702807	StrawSepia0266-MS-1	54	+	Cep170
chr1	189790637	189790638	HoneydewSepia0245-MS-1	54	+	Esrrg	Esrrg
chr10	92020482	92020483	StrawSepia0266-MS-1	54	+
chr11	73864626	73864627	StrawSepia0266-MS-1	54	-
chr12	4947920	4947921	StrawSepia0266-MS-1	54	-	Atad2b
chr12	52860977	52860978	StrawSepia0266-MS-1	54	+	Hectd1
chr13	39556716	39556717	StrawSepia0266-MS-1	54	-
chr13	63416185	63416186	HoneydewSepia0251-MS-1	54	+	2010111I01Rik|Fancc	2010111I01Rik
chr13	65164626	65164627	HoneydewSepia0251-MS-1	54	+
chr14	28616808	28616809	StrawSepia0266-MS-1	54	-	Erc2
chr14	75610123	75610124	StrawSepia0266-MS-1	54	+	Lcp1	Lcp1
chr14	94706159	94706160	StrawSepia0266-MS-1	54	+
chr15	49701967	49701968	StrawSepia0266-MS-1	54	+
chr15	72773784	72773785	StrawSepia0266-MS-1	54	+	Trappc9
chr15	95780011	95780012	HoneydewSepia0251-MS-1	54	-	Ano6
chr16	33503607	33503608	HoneydewSepia0251-MS-1	54	-	Zfp148
chr16	35292726	35292727	StrawSepia0266-MS-1	54	+	Adcy5	Adcy5
chr16	64500853	64500854	StrawSepia0266-MS-1	54	-
chr17	43208971	43208972	HoneydewSepia0251-MS-1	54	+	Tnfrsf21	Tnfrsf21
chr18	85425411	85425412	StrawSepia0266-MS-1	54	+
chr1_random	280388	280389	HoneydewSepia0251-MS-1	54	+	Aida	Aida
chr2	77735199	77735200	HoneydewSepia0251-MS-1	54	-	Cwc22	Cwc22
chr2	108098010	108098011	HoneydewSepia0251-MS-1	54	-
chr2	136201698	136201699	HoneydewSepia0245-MS-1	54	+	Pak7
chr3	40121425	40121426	HoneydewSepia0251-MS-1	54	-
chr3	135250668	135250669	StrawSepia0266-MS-1	54	-	Nfkb1	Nfkb1
chr3	137624132	137624133	StrawSepia0266-MS-1	54	-	Dapp1	Dapp1
chr3	138210980	138210981	StrawSepia0266-MS-1	54	+	Eif4e	Eif4e
chr4	84658395	84658396	HoneydewSepia0245-MS-1	54	-	Cntln
chr4	151336082	151336083	StrawSepia0266-MS-1	54	-	Dnajc11
chr5	9227523	9227524	HoneydewSepia0245-MS-1	54	-
chr5	29389474	29389475	StrawSepia0266-MS-1	54	+
chr5	48449038	48449039	HoneydewSepia0251-MS-1	54	+	Slit2	Slit2
chr5	103020593	103020594	HoneydewSepia0245-MS-1	54	+	Arhgap24	Arhgap24
chr7	59991458	59991459	HoneydewSepia0245-MS-1	54	-
chr8	70537488	70537489	StrawSepia0266-MS-1	54	-
chr8	100224073	100224074	StrawSepia0266-MS-1	54	-
chrX	89536744	89536745	StrawSepia0266-MS-1	54	-	Mageb18	Mageb18
chr1	26194553	26194554	StrawSepia0266-MS-1	53	-
chr1	65401832	65401833	HoneydewSepia0245-MS-1	53	-	Pth2r
chr1	105243326	105243327	HoneydewSepia0245-MS-1	53	+
chr1	109534859	109534860	StrawSepia0266-MS-1	53	-
chr1	125789420	125789421	StrawSepia0266-MS-1	53	-	Dpp10	Dpp10
chr1	147906979	147906980	HoneydewSepia0251-MS-1	53	+
chr1	186817762	186817763	HoneydewSepia0245-MS-1	53	-	Mark1	Mark1
chr1	191121928	191121929	HoneydewSepia0245-MS-1	53	-	Kcnk2	Kcnk2
chr1	194370754	194370755	StrawSepia0266-MS-1	53	+	Hhat
chr10	42531960	42531961	HoneydewSepia0245-MS-1	53	-	Sec63
chr10	70775019	70775020	HoneydewSepia0251-MS-1	53	+
chr11	20114899	20114900	StrawSepia0266-MS-1	53	-	Rab1
chr11	32607578	32607579	StrawSepia0266-MS-1	53	-	Fbxw11
chr11	55575925	55575926	StrawSepia0266-MS-1	53	+
chr11	60370559	60370560	StrawSepia0266-MS-1	53	-	Alkbh5
chr11	61375163	61375164	HoneydewSepia0251-MS-1	53	-	Epn2	Epn2
chr12	7762895	7762896	StrawSepia0266-MS-1	53	+
chr12	10178777	10178778	HoneydewSepia0251-MS-1	53	+
chr12	11421812	11421813	HoneydewSepia0245-MS-1	53	-	Vsnl1	Vsnl1
chr12	97523743	97523744	HoneyDewSepia0232-MS-2	53	-
chr13	14102675	14102676	HoneydewSepia0251-MS-1	53	+	Tbce
chr13	29593401	29593402	StrawSepia0266-MS-1	53	-	Cdkal1	Cdkal1
chr13	74117985	74117986	StrawSepia0266-MS-1	53	-	Zdhhc11
chr14	52698716	52698717	HoneydewSepia0251-MS-1	53	-	Hnrnpc	Hnrnpc
chr15	50384823	50384824	StrawSepia0266-MS-1	53	-
chr15	92351169	92351170	StrawSepia0266-MS-1	53	+	Pdzrn4	Pdzrn4
chr16	64216104	64216105	StrawSepia0266-MS-1	53	+
chr16	71010827	71010828	HoneydewSepia0245-MS-1	53	-
chr17	10504057	10504058	StrawSepia0266-MS-1	53	-	Qk	Qk
chr17	26674859	26674860	StrawSepia0266-MS-1	53	+
chr17	38247623	38247624	HoneydewSepia0251-MS-1	53	+
chr19	15103759	15103760	StrawSepia0266-MS-1	53	+
chr19	29324531	29324532	HoneydewSepia0251-MS-1	53	-
chr19	34337750	34337751	StrawSepia0266-MS-1	53	-
chr2	28986281	28986282	HoneydewSepia0245-MS-1	53	+	Setx	Setx
chr2	52267139	52267140	StrawSepia0266-MS-1	53	+	Arl5a
chr2	85401311	85401312	StrawSepia0266-MS-1	53	-
chr2	144197147	144197148	StrawSepia0266-MS-1	53	-	Csrp2bp|Pet117
chr3	77116561	77116562	StrawSepia0266-MS-1	53	-
chr3	140666202	140666203	StrawSepia0266-MS-1	53	-
chr4	101124983	101124984	HoneydewSepia0251-MS-1	53	+	Ak4	Ak4
chr4	108557356	108557357	StrawSepia0266-MS-1	53	-	Rab3b
chr4	135880681	135880682	StrawSepia0266-MS-1	53	-	Hnrnpr
chr5	34714121	34714122	StrawSepia0266-MS-1	53	-	Fam193a
chr6	9880654	9880655	StrawSepia0266-MS-1	53	-
chr7	83595194	83595195	HoneydewSepia0251-MS-1	53	+	Agbl1	Agbl1
chr7	102653853	102653854	StrawSepia0266-MS-1	53	-
chr7	123089088	123089089	HoneydewSepia0251-MS-1	53	-	Sox6	Sox6
chr7	151724941	151724942	StrawSepia0266-MS-1	53	+	Ppfia1
chr8	19185705	19185706	StrawSepia0266-MS-1	53	+
chr8	83834659	83834660	HoneydewSepia0245-MS-1	53	-
chr9	7817995	7817996	StrawSepia0266-MS-1	53	-
chr9	61865323	61865324	HoneydewSepia0251-MS-1	53	-	Paqr5	Paqr5
chr9	66384034	66384035	HoneydewSepia0245-MS-1	53	+	Usp3
chr9	77387180	77387181	HoneydewSepia0245-MS-1	53	-	Lrrc1	Lrrc1
chrX	37630236	37630237	StrawSepia0266-MS-1	53	-
chrX	127995709	127995710	StrawSepia0266-MS-1	53	-
chrX	139990757	139990758	StrawSepia0266-MS-1	53	+	Pak3	Pak3
chr1	20370686	20370687	StrawSepia0266-MS-1	52	+	4930486I03Rik|Pkhd1	4930486I03Rik
chr1	32733244	32733245	StrawSepia0266-MS-1	52	-
chr1	56119824	56119825	HoneydewSepia0251-MS-1	52	+
chr1	73137195	73137196	HoneydewSepia0245-MS-1	52	-
chr1	81001366	81001367	StrawSepia0266-MS-1	52	+
chr1	84831935	84831936	HoneydewSepia0251-MS-1	52	+	Trip12
chr1	98954633	98954634	StrawSepia0266-MS-1	52	-
chr1	102638638	102638639	StrawSepia0266-MS-1	52	-
chr1	115632486	115632487	HoneydewSepia0251-MS-1	52	+
chr1	134030944	134030945	StrawSepia0266-MS-1	52	-	Cdk18	Cdk18
chr1	151861389	151861390	HoneydewSepia0251-MS-1	52	-
chr1	159743309	159743310	StrawSepia0266-MS-1	52	+
chr1	160913800	160913801	StrawSepia0266-MS-1	52	+
chr1	170924836	170924837	HoneydewSepia0251-MS-1	52	+
chr1	181499408	181499409	StrawSepia0266-MS-1	52	-	Cnst
chr1	194272468	194272469	StrawSepia0269-MS-2	52	-	Kcnh1
chr10	60804385	60804386	HoneydewSepia0245-MS-1	52	-	Pald1	Pald1
chr10	71180490	71180491	HoneydewSepia0245-MS-1	52	-
chr11	41645222	41645223	StrawSepia0266-MS-1	52	+
chr11	70752108	70752109	StrawSepia0266-MS-1	52	+	Rabep1	Rabep1
chr12	4435901	4435902	HoneydewSepia0251-MS-1	52	-	Ncoa1	Ncoa1
chr12	52740814	52740815	StrawSepia0266-MS-1	52	+	Strn3
chr12	72109465	72109466	HoneydewSepia0251-MS-1	52	+	3110056K07Rik
chr12	121196665	121196666	StrawSepia0266-MS-1	52	+	Tmem196	Tmem196
chr13	81949591	81949592	StrawSepia0266-MS-1	52	-
chr13	106318731	106318732	StrawSepia0266-MS-1	52	-
chr14	38121265	38121266	HoneydewSepia0245-MS-1	52	+
chr14	120765444	120765445	StrawSepia0266-MS-1	52	+	Mbnl2	Mbnl2
chr15	47444112	47444113	StrawSepia0266-MS-1	52	-	Csmd3	Csmd3
chr16	60360677	60360678	StrawSepia0266-MS-1	52	+	Epha6
chr16	95720434	95720435	HoneydewSepia0245-MS-1	52	-	Erg	Erg
chr17	19701358	19701359	StrawSepia0266-MS-1	52	+
chr17	65044239	65044240	HoneydewSepia0251-MS-1	52	-	Man2a1
chr18	47462280	47462281	StrawSepia0266-MS-1	52	-	Sema6a	Sema6a
chr18	51423937	51423938	StrawSepia0266-MS-1	52	-	Prr16
chr19	47206761	47206762	HoneydewSepia0251-MS-1	52	+	Calhm2
chr2	61963411	61963412	StrawSepia0266-MS-1	52	+	Slc4a10	Slc4a10
chr4	97034166	97034167	StrawSepia0266-MS-1	52	-
chr4	152466859	152466860	StrawSepia0266-MS-1	52	-
chr5	19851987	19851988	HoneydewSepia0245-MS-1	52	-	Magi2
chr5	83057977	83057978	HoneydewSepia0251-MS-1	52	+
chr6	70857060	70857061	HoneydewSepia0251-MS-1	52	-
chr7	71691380	71691381	HoneydewSepia0251-MS-1	52	-	Apba2
chr7	71736202	71736203	StrawSepia0266-MS-1	52	-	Apba2
chr7	83102908	83102909	HoneydewSepia0245-MS-1	52	-
chr8	41593326	41593327	StrawSepia0266-MS-1	52	+	Cnot7
chr8	75459162	75459163	StrawSepia0266-MS-1	52	-	Large	Large
chr9	64887497	64887498	StrawSepia0266-MS-1	52	+	Dpp8	Dpp8
chr9	67720015	67720016	HoneydewSepia0251-MS-1	52	+	Vps13c	Vps13c
chr9	70334713	70334714	StrawSepia0266-MS-1	52	-	Rnf111	Rnf111
chr9	73131129	73131130	StrawSepia0266-MS-1	52	+
chr9	97142887	97142888	StrawSepia0266-MS-1	52	+
chr9	109839345	109839346	StrawSepia0266-MS-1	52	+	Map4	Map4
chrX	40336331	40336332	HoneydewSepia0251-MS-1	52	-	Tenm1	Tenm1
chr1	9347965	9347966	HoneydewSepia0251-MS-1	51	+
chr1	12772879	12772880	HoneydewSepia0245-MS-1	51	+	Sulf1	Sulf1
chr1	28254045	28254046	StrawSepia0266-MS-1	51	+
chr1	53348192	53348193	HoneydewSepia0251-MS-1	51	-	Pms1	Pms1
chr1	75091067	75091068	StrawSepia0266-MS-1	51	+	Nhej1
chr1	78126583	78126584	HoneydewSepia0251-MS-1	51	+	Pax3
chr1	129970068	129970069	HoneydewSepia0245-MS-1	51	+	Zranb3
chr1	143503356	143503357	StrawSepia0266-MS-1	51	+
chr1	150090115	150090116	HoneydewSepia0251-MS-1	51	+
chr1	161234024	161234025	StrawSepia0266-MS-1	51	+	Rfwd2	Rfwd2
chr1	190830309	190830310	StrawSepia0266-MS-1	51	-	Kctd3	Kctd3
chr1	196731314	196731315	StrawSepia0266-MS-1	51	+
chr10	77673405	77673406	HoneydewSepia0251-MS-1	51	+	Trappc10
chr10	102627824	102627825	HoneydewSepia0251-MS-1	51	-	Lrriq1	Lrriq1
chr11	11598915	11598916	HoneydewSepia0251-MS-1	51	-	Ikzf1
chr11	36144558	36144559	StrawSepia0266-MS-1	51	+	Tenm2
chr11	83924584	83924585	StrawSepia0266-MS-1	51	+	Tada2a
chr12	68185485	68185486	StrawSepia0266-MS-1	51	+	Mdga2
chr12	70439832	70439833	StrawSepia0266-MS-1	51	-	Nemf	Nemf
chr12	87109144	87109145	HoneydewSepia0245-MS-1	51	-	Mfsd7c
chr14	57363080	57363081	StrawSepia0266-MS-1	51	+	Pspc1
chr15	52324747	52324748	HoneydewSepia0251-MS-1	51	-
chr15	96273394	96273395	HoneydewSepia0251-MS-1	51	-	Scaf11	Scaf11
chr16	38138128	38138129	StrawSepia0266-MS-1	51	-	Gsk3b
chr16	84019493	84019494	HoneydewSepia0245-MS-1	51	-
chr17	20799664	20799665	HoneydewSepia0251-MS-1	51	+
chr17	80826717	80826718	HoneydewSepia0251-MS-1	51	+	Sos1
chr17	94506333	94506334	HoneydewSepia0251-MS-1	51	-
chr19	46401274	46401275	HoneydewSepia0245-MS-1	51	+	Psd
chr2	33395198	33395199	HoneydewSepia0251-MS-1	51	-
chr2	55835634	55835635	HoneydewSepia0245-MS-1	51	-
chr2	123920166	123920167	HoneydewSepia0251-MS-1	51	+	Sema6d	Sema6d
chr3	147097685	147097686	StrawSepia0266-MS-1	51	+
chr4	22851743	22851744	HoneydewSepia0251-MS-1	51	-
chr4	50055337	50055338	HoneydewSepia0245-MS-1	51	-
chr4	128553689	128553690	StrawSepia0266-MS-1	51	+
chr5	88291801	88291802	StrawSepia0266-MS-1	51	+
chr6	35770841	35770842	HoneydewSepia0251-MS-1	51	+
chr6	76134670	76134671	StrawSepia0266-MS-1	51	-
chr6	119786334	119786335	StrawSepia0266-MS-1	51	-	Erc1	Erc1
chr8	26285303	26285304	HoneydewSepia0251-MS-1	51	+	Tacc1
chr8	46774562	46774563	StrawSepia0266-MS-1	51	-	Sorbs2
chr8	105163555	105163556	StrawSepia0266-MS-1	51	+	Cdh11
chr8	112108108	112108109	HoneydewSepia0251-MS-1	51	+
chr9	17366516	17366517	HoneydewSepia0251-MS-1	51	+
chrX	126757611	126757612	HoneydewSepia0251-MS-1	51	+	Diap2	Diap2
chr1	23380421	23380422	HoneydewSepia0245-MS-1	50	-	Ogfrl1	Ogfrl1
chr1	52987991	52987992	HoneydewSepia0245-MS-1	50	+	1700019D03Rik
chr1	81714531	81714532	HoneydewSepia0245-MS-1	50	-
chr1	92735298	92735299	StrawSepia0266-MS-1	50	-	Col6a3	Col6a3
chr1	128770146	128770147	HoneydewSepia0251-MS-1	50	+
chr1	150576754	150576755	HoneydewSepia0245-MS-1	50	+
chr11	53241547	53241548	StrawSepia0266-MS-1	50	+
chr11	113532717	113532718	StrawSepia0266-MS-1	50	-	Fam104a	Fam104a
chr12	65070253	65070254	HoneydewSepia0245-MS-1	50	+
chr12	91141507	91141508	HoneydewSepia0251-MS-1	50	+	Nrxn3	Nrxn3
chr12	92816604	92816605	StrawSepia0266-MS-1	50	+	Gtf2a1
chr13	17759174	17759175	HoneyDewSepia0232-MS-2	50	-	Sugct	Sugct
chr14	101462243	101462244	HoneydewSepia0245-MS-1	50	-
chr14	111155929	111155930	StrawSepia0266-MS-1	50	+
chr16	18171266	18171267	StrawSepia0266-MS-1	50	+
chr17	5531336	5531337	HoneydewSepia0251-MS-1	50	+	Zdhhc14	Zdhhc14
chr17	17717000	17717001	StrawSepia0266-MS-1	50	-	Lnpep	Lnpep
chr18	37293123	37293124	StrawSepia0266-MS-1	50	+	Gm37013|Pcdha1|Pcdha10|Pcdha11|Pcdha12|Pcdha2|Pcdha3|Pcdha4|Pcdha5|Pcdha6|Pcdha6-g|Pcdha7|Pcdha7-g|Pcdha8|Pcdha9|Pcdhac1	Gm37013|Pcdha1|Pcdha10|Pcdha11|Pcdha12|Pcdha2|Pcdha3|Pcdha4|Pcdha5|Pcdha6|Pcdha6-g|Pcdha7|Pcdha7-g|Pcdha8|Pcdha9|Pcdhac1
chr19	36947872	36947873	HoneydewSepia0251-MS-1	50	+	Tnks2	Tnks2
chr2	14852645	14852646	StrawSepia0266-MS-1	50	+	Cacnb2	Cacnb2
chr2	30930642	30930643	StrawSepia0266-MS-1	50	-	Fnbp1	Fnbp1
chr2	58388146	58388147	HoneydewSepia0245-MS-1	50	+	Acvr1
chr2	144978678	144978679	StrawSepia0266-MS-1	50	+
chr3	25707202	25707203	StrawSepia0266-MS-1	50	+	Nlgn1
chr3	82576324	82576325	HoneydewSepia0251-MS-1	50	-
chr3	105532884	105532885	HoneydewSepia0251-MS-1	50	+	Rap1a
chr4	67334624	67334625	HoneydewSepia0251-MS-1	50	+
chr4	71679360	71679361	StrawSepia0266-MS-1	50	-
chr5	9696929	9696930	HoneydewSepia0245-MS-1	50	+	Grm3
chr5	66077037	66077038	StrawSepia0266-MS-1	50	+	Pds5a
chr5	77697692	77697693	HoneydewSepia0251-MS-1	50	-	Rest
chr5	107677725	107677726	StrawSepia0266-MS-1	50	-	Tgfbr3	Tgfbr3
chr5	137081104	137081105	StrawSepia0266-MS-1	50	+
chr5	143631137	143631138	StrawSepia0266-MS-1	50	-
chr5	148255949	148255950	HoneydewSepia0251-MS-1	50	+	Pan3	Pan3
chr6	7202280	7202281	HoneydewSepia0251-MS-1	50	+
chr6	8224978	8224979	StrawSepia0266-MS-1	50	+	Umad1	Umad1
chr6	52139900	52139901	StrawSepia0266-MS-1	50	+	Hoxa3|Hoxa4
chr6	79052842	79052843	StrawSepia0266-MS-1	50	+
chr6	92664682	92664683	HoneydewSepia0245-MS-1	50	+
chr7	52630555	52630556	StrawSepia0266-MS-1	50	-
chr7	80530143	80530144	HoneydewSepia0245-MS-1	50	+	Rgma	Rgma
chr7	97293774	97293775	StrawSepia0266-MS-1	50	-	Picalm
chr7	106122271	106122272	HoneydewSepia0251-MS-1	50	+	Uvrag
chr7	150252259	150252260	StrawSepia0266-MS-1	50	+	Cd81	Cd81
chr8	5331404	5331405	StrawSepia0266-MS-1	50	-
chr8	23655674	23655675	HoneydewSepia0245-MS-1	50	+	Slc20a2	Slc20a2
chr8	68191739	68191740	StrawSepia0269-MS-2	50	-	2018-03-01
chr9	35208810	35208811	HoneydewSepia0251-MS-1	50	+
chrX	126894300	126894301	StrawSepia0266-MS-1	50	+	Diap2	Diap2
chr1	19125771	19125772	HoneydewSepia0251-MS-1	49	-	Tfap2d
chr1	32402241	32402242	HoneydewSepia0245-MS-1	49	+	Khdrbs2	Khdrbs2
chr1	39396050	39396051	HoneydewSepia0245-MS-1	49	-	Npas2
chr1	43558071	43558072	StrawSepia0266-MS-1	49	+	Nck2	Nck2
chr1	45438796	45438797	HoneydewSepia0251-MS-1	49	+	Col5a2
chr1	76977668	76977669	StrawSepia0266-MS-1	49	-
chr1	96514248	96514249	StrawSepia0266-MS-1	49	-
chr1	105678021	105678022	StrawSepia0266-MS-1	49	+
chr1	111419456	111419457	StrawSepia0266-MS-1	49	+
chr1	118945940	118945941	StrawSepia0266-MS-1	49	+
chr1	124986779	124986780	StrawSepia0266-MS-1	49	-
chr1	130563475	130563476	HoneydewSepia0251-MS-1	49	+
chr1	162844155	162844156	StrawSepia0266-MS-1	49	+	Rc3h1	Rc3h1
chr1	170324790	170324791	HoneydewSepia0245-MS-1	49	-	Pbx1	Pbx1
chr10	28173650	28173651	StrawSepia0266-MS-1	49	-	Ptprk
chr10	29077145	29077146	HoneydewSepia0245-MS-1	49	+	Rnf146
chr10	33937876	33937877	StrawSepia0266-MS-1	49	-
chr10	100690310	100690311	HoneydewSepia0251-MS-1	49	-
chr10	112757541	112757542	HoneydewSepia0245-MS-1	49	-
chr11	79056907	79056908	StrawSepia0266-MS-1	49	+	Wsb1
chr11	79220427	79220428	HoneydewSepia0251-MS-1	49	-	Nf1
chr12	103232647	103232648	HoneydewSepia0245-MS-1	49	+	Cpsf2	Cpsf2
chr13	19468722	19468723	StrawSepia0266-MS-1	49	-	Stard3nl	Stard3nl
chr13	43450742	43450743	StrawSepia0266-MS-1	49	-
chr13	71998551	71998552	HoneydewSepia0251-MS-1	49	-
chr13	111301700	111301701	StrawSepia0266-MS-1	49	+
chr14	24582347	24582348	StrawSepia0266-MS-1	49	-	Kcnma1	Kcnma1
chr14	66097680	66097681	StrawSepia0266-MS-1	49	-
chr14	106555798	106555799	HoneydewSepia0251-MS-1	49	-
chr14	114865574	114865575	StrawSepia0266-MS-1	49	-
chr15	37281523	37281524	HoneydewSepia0251-MS-1	49	-	Grhl2
chr15	77084571	77084572	HoneydewSepia0251-MS-1	49	+	Rbfox2
chr16	27142600	27142601	HoneydewSepia0245-MS-1	49	+
chr16	29416513	29416514	HoneydewSepia0251-MS-1	49	+	Atp13a4
chr16	78282006	78282007	StrawSepia0266-MS-1	49	+
chr17	30296103	30296104	StrawSepia0266-MS-1	49	+	Zfand3	Zfand3
chr17	46137097	46137098	HoneydewSepia0245-MS-1	49	+
chr17	71344655	71344656	StrawSepia0266-MS-1	49	+	Myl12a
chr17	90543025	90543026	HoneydewSepia0251-MS-1	49	+	Nrxn1
chr17	93618595	93618596	StrawSepia0266-MS-1	49	+
chr18	9223184	9223185	StrawSepia0266-MS-1	49	+
chr18	18271045	18271046	StrawSepia0266-MS-1	49	-
chr18	54088774	54088775	HoneydewSepia0245-MS-1	49	-	Csnk1g3
chr18	64142548	64142549	HoneydewSepia0251-MS-1	49	-	Wdr7
chr18	84832862	84832863	HoneydewSepia0251-MS-1	49	+
chr19	27154209	27154210	StrawSepia0266-MS-1	49	+
chr19	30111031	30111032	StrawSepia0266-MS-1	49	+	Uhrf2	Uhrf2
chr19	47035603	47035604	HoneydewSepia0245-MS-1	49	+	Nt5c2
chr19	61203596	61203597	HoneydewSepia0245-MS-1	49	+
chr2	38451639	38451640	StrawSepia0266-MS-1	49	-	Psmb7	Psmb7
chr2	105903046	105903047	StrawSepia0266-MS-1	49	-
chr2	107751292	107751293	StrawSepia0266-MS-1	49	-
chr3	30515451	30515452	StrawSepia0266-MS-1	49	+	Mynn	Mynn
chr3	85874244	85874245	HoneydewSepia0245-MS-1	49	+
chr3	88504451	88504452	HoneydewSepia0245-MS-1	49	-	2810403A07Rik
chr3	109281776	109281777	StrawSepia0266-MS-1	49	+	Vav3	Vav3
chr3	119475580	119475581	StrawSepia0266-MS-1	49	-	Ptbp2	Ptbp2
chr3	125631245	125631246	HoneydewSepia0251-MS-1	49	-	Ugt8a	Ugt8a
chr3	142738949	142738950	HoneydewSepia0251-MS-1	49	-
chr4	27021073	27021074	StrawSepia0266-MS-1	49	-
chr4	49882704	49882705	StrawSepia0266-MS-1	49	+
chr4	139009693	139009694	HoneydewSepia0245-MS-1	49	+	Ubr4	Ubr4
chr5	23060667	23060668	StrawSepia0266-MS-1	49	+	Srpk2
chr5	102420277	102420278	HoneydewSepia0245-MS-1	49	+	Wdfy3
chr5	140565743	140565744	HoneydewSepia0245-MS-1	49	-	Mad1l1	Mad1l1
chr6	52692993	52692994	HoneydewSepia0245-MS-1	49	-	Tax1bp1
chr6	95584934	95584935	HoneydewSepia0251-MS-1	49	-	Suclg2	Suclg2
chr6	133089653	133089654	HoneydewSepia0245-MS-1	49	+
chr6	149042766	149042767	StrawSepia0266-MS-1	49	-	Dennd5b	Dennd5b
chr7	96679213	96679214	HoneydewSepia0251-MS-1	49	-
chr8	41575161	41575162	HoneydewSepia0251-MS-1	49	+
chr8	129744710	129744711	HoneydewSepia0245-MS-1	49	-	Pard3
chr9	6614041	6614042	HoneydewSepia0251-MS-1	49	-
chr9	53430334	53430335	StrawSepia0266-MS-1	49	+	Cul5
chr9	103779362	103779363	StrawSepia0266-MS-1	49	+
chrX	108976080	108976081	HoneydewSepia0245-MS-1	49	+
chr1	32618368	32618369	HoneydewSepia0245-MS-1	48	-	Khdrbs2
chr1	41718881	41718882	HoneydewSepia0245-MS-1	48	-
chr1	49287891	49287892	HoneydewSepia0245-MS-1	48	+
chr1	55804357	55804358	StrawSepia0266-MS-1	48	-	Plcl1
chr1	79682452	79682453	HoneydewSepia0251-MS-1	48	-
chr1	108671297	108671298	StrawSepia0266-MS-1	48	+	Vps4b
chr1	113294963	113294964	StrawSepia0266-MS-1	48	-
chr1	124011707	124011708	StrawSepia0266-MS-1	48	+
chr1	127299293	127299294	HoneydewSepia0245-MS-1	48	-	Actr3	Actr3
chr1	129703012	129703013	HoneydewSepia0251-MS-1	48	-
chr1	131884929	131884930	StrawSepia0266-MS-1	48	+	Thsd7b	Thsd7b
chr1	137029344	137029345	StrawSepia0266-MS-1	48	+	Ptpn7	Ptpn7
chr1	148353951	148353952	StrawSepia0266-MS-1	48	-	Brinp3
chr1	151462291	151462292	HoneydewSepia0251-MS-1	48	+
chr1	161552456	161552457	HoneydewSepia0251-MS-1	48	-	Tnr
chr1	167622504	167622505	HoneydewSepia0251-MS-1	48	-	Rcsd1	Rcsd1
chr10	27328593	27328594	HoneydewSepia0251-MS-1	48	+	Lama2
chr11	39006832	39006833	StrawSepia0266-MS-1	48	+
chr11	57868553	57868554	HoneydewSepia0251-MS-1	48	-	Larp1
chr11	88226963	88226964	StrawSepia0266-MS-1	48	+	Msi2
chr11	91726205	91726206	StrawSepia0266-MS-1	48	+
chr12	42188660	42188661	StrawSepia0266-MS-1	48	-	Immp2l|Lrrn3	Lrrn3
chr12	101644366	101644367	HoneydewSepia0251-MS-1	48	+	Ttc7b
chr13	28811393	28811394	HoneydewSepia0251-MS-1	48	-	2610307P16Rik	2610307P16Rik
chr13	46792880	46792881	StrawSepia0266-MS-1	48	+	Nup153
chr13	102510128	102510129	HoneydewSepia0245-MS-1	48	+	Pik3r1
chr13	118037941	118037942	HoneydewSepia0251-MS-1	48	+	Emb	Emb
chr14	20922631	20922632	HoneydewSepia0251-MS-1	48	-
chr14	70277392	70277393	HoneydewSepia0251-MS-1	48	-	Pebp4
chr14	75514702	75514703	HoneydewSepia0251-MS-1	48	-	Lrrc63	Lrrc63
chr14	78091833	78091834	HoneydewSepia0245-MS-1	48	+	Enox1	Enox1
chr14	116916221	116916222	HoneydewSepia0251-MS-1	48	-	Gpc5
chr15	41368945	41368946	StrawSepia0266-MS-1	48	-	Mir8115|Oxr1	Mir8115
chr15	96267384	96267385	HoneydewSepia0251-MS-1	48	-	Scaf11	Scaf11
chr16	4141619	4141620	StrawSepia0266-MS-1	48	+	Crebbp
chr16	52354663	52354664	HoneydewSepia0251-MS-1	48	+	Alcam
chr18	31803998	31803999	HoneydewSepia0251-MS-1	48	+	Sap130	Sap130
chr19	24177143	24177144	HoneydewSepia0251-MS-1	48	+	Tjp2
chr2	32782690	32782691	HoneydewSepia0251-MS-1	48	+	Lrsam1
chr2	68052016	68052017	StrawSepia0266-MS-1	48	-	Stk39	Stk39
chr2	73534383	73534384	HoneydewSepia0245-MS-1	48	+	Chn1
chr2	118755073	118755074	StrawSepia0266-MS-1	48	-
chr2	125243213	125243214	HoneydewSepia0245-MS-1	48	-	Fbn1	Fbn1
chr2	165820979	165820980	StrawSepia0266-MS-1	48	-	Ncoa3
chr2	181350608	181350609	StrawSepia0266-MS-1	48	-	Prpf6
chr3	3505470	3505471	HoneydewSepia0251-MS-1	48	+
chr3	5506239	5506240	StrawSepia0266-MS-1	48	+
chr3	51466832	51466833	StrawSepia0266-MS-1	48	-	Mgst2
chr3	122305318	122305319	HoneydewSepia0251-MS-1	48	+	Fnbp1l
chr4	23952262	23952263	HoneydewSepia0251-MS-1	48	-
chr4	34783377	34783378	StrawSepia0266-MS-1	48	+	Zfp292
chr4	68293036	68293037	HoneydewSepia0245-MS-1	48	-
chr4	89957125	89957126	HoneydewSepia0251-MS-1	48	+
chr4	121690058	121690059	HoneydewSepia0251-MS-1	48	+
chr4	134153682	134153683	HoneydewSepia0245-MS-1	48	-	Man1c1	Man1c1
chr4	135425879	135425880	HoneydewSepia0251-MS-1	48	+
chr5	60572814	60572815	StrawSepia0266-MS-1	48	+
chr5	123095883	123095884	HoneydewSepia0251-MS-1	48	+	P2rx7	P2rx7
chr6	15833570	15833571	StrawSepia0266-MS-1	48	+
chr6	35468468	35468469	StrawSepia0266-MS-1	48	-	Mtpn	Mtpn
chr6	47451009	47451010	HoneydewSepia0245-MS-1	48	-	Cul1
chr6	79664731	79664732	StrawSepia0266-MS-1	48	-
chr6	113058500	113058501	StrawSepia0266-MS-1	48	+	Setd5	Setd5
chr6	136020921	136020922	StrawSepia0266-MS-1	48	+	Grin2b
chr7	107765117	107765118	HoneydewSepia0251-MS-1	48	-	Rab6a
chr8	128526631	128526632	HoneydewSepia0245-MS-1	48	-	Kcnk1
chr9	26288136	26288137	StrawSepia0266-MS-1	48	+
chr9	37832730	37832731	HoneydewSepia0251-MS-1	48	-
chr9	99255073	99255074	HoneyDewSepia0232-MS-2	48	+	Esyt3
chrX	161544910	161544911	StrawSepia0266-MS-1	48	-
chr1	12784444	12784445	StrawSepia0266-MS-1	47	+	Sulf1	Sulf1
chr1	22549986	22549987	HoneydewSepia0245-MS-1	47	+	Rims1
chr1	70770916	70770917	HoneydewSepia0245-MS-1	47	+	Spag16	Spag16
chr1	110070022	110070023	StrawSepia0266-MS-1	47	-
chr1	144945538	144945539	StrawSepia0266-MS-1	47	-
chr1	150187500	150187501	HoneydewSepia0251-MS-1	47	-
chr1	153245210	153245211	StrawSepia0266-MS-1	47	-	Swt1	Swt1
chr10	20049045	20049046	StrawSepia0266-MS-1	47	+	Bclaf1	Bclaf1
chr10	24889640	24889641	StrawSepia0266-MS-1	47	+	Akap7
chr10	32457786	32457787	HoneydewSepia0251-MS-1	47	+	Nkain2
chr11	38096924	38096925	StrawSepia0266-MS-1	47	+
chr11	50776541	50776542	HoneydewSepia0245-MS-1	47	+
chr11	52094087	52094088	StrawSepia0266-MS-1	47	+	Tcf7
chr11	67848169	67848170	StrawSepia0266-MS-1	47	-	Stx8
chr12	17675380	17675381	StrawSepia0266-MS-1	47	-
chr12	36385080	36385081	StrawSepia0266-MS-1	47	+
chr12	86686166	86686167	StrawSepia0266-MS-1	47	+	Tmed10
chr13	20595740	20595741	HoneydewSepia0245-MS-1	47	+	Elmo1	Elmo1
chr13	44118135	44118136	StrawSepia0266-MS-1	47	-
chr14	22395255	22395256	StrawSepia0266-MS-1	47	+	Kat6b	Kat6b
chr14	62764553	62764554	HoneydewSepia0251-MS-1	47	-
chr14	66920614	66920615	StrawSepia0266-MS-1	47	+	Trim35	Trim35
chr14	72527673	72527674	HoneydewSepia0251-MS-1	47	+
chr14	93807595	93807596	HoneydewSepia0251-MS-1	47	-	Pcdh9	Pcdh9
chr15	23602308	23602309	StrawSepia0266-MS-1	47	-
chr15	45072620	45072621	HoneydewSepia0251-MS-1	47	+
chr15	86912561	86912562	HoneydewSepia0251-MS-1	47	-
chr17	24213975	24213976	StrawSepia0266-MS-1	47	+	Pdpk1
chr17	66439007	66439008	StrawSepia0266-MS-1	47	-	Ndufv2	Ndufv2
chr17	77541760	77541761	HoneydewSepia0251-MS-1	47	-
chr17	85756011	85756012	StrawSepia0266-MS-1	47	+	Camkmt	Camkmt
chr17	88430848	88430849	StrawSepia0266-MS-1	47	+	Fbxo11
chr18	37799837	37799838	StrawSepia0266-MS-1	47	+	Gm37013|Pcdha6-g|Pcdha7-g	Gm37013|Pcdha6-g|Pcdha7-g
chr18	53378987	53378988	StrawSepia0266-MS-1	47	+	Snx2	Snx2
chr18	86758383	86758384	StrawSepia0266-MS-1	47	+
chr19	25213472	25213473	StrawSepia0266-MS-1	47	+	Dock8	Dock8
chr19	26816169	26816170	StrawSepia0266-MS-1	47	+	Smarca2	Smarca2
chr19	37011146	37011147	HoneydewSepia0245-MS-1	47	-	Btaf1
chr19	57695244	57695245	StrawSepia0266-MS-1	47	+	Atrnl1	Atrnl1
chr2	76142245	76142246	HoneydewSepia0251-MS-1	47	-	Pde11a	Pde11a
chr2	102038992	102038993	HoneydewSepia0251-MS-1	47	+
chr2	111094020	111094021	StrawSepia0266-MS-1	47	-
chr2	134078974	134078975	StrawSepia0266-MS-1	47	-
chr3	38371080	38371081	StrawSepia0266-MS-1	47	+	Ankrd50
chr3	48089965	48089966	HoneydewSepia0251-MS-1	47	+
chr3	95241257	95241258	StrawSepia0266-MS-1	47	+	Arnt	Arnt
chr3	109854897	109854898	HoneydewSepia0251-MS-1	47	+	Ntng1
chr3	123379303	123379304	StrawSepia0266-MS-1	47	+	Ndst3
chr3	149340123	149340124	HoneydewSepia0251-MS-1	47	-
chr4	30018900	30018901	StrawSepia0266-MS-1	47	+
chr4	88059026	88059027	StrawSepia0266-MS-1	47	-	Hacd4	Hacd4
chr4	102437716	102437717	StrawSepia0266-MS-1	47	+	Sgip1	Sgip1
chr4	120875856	120875857	StrawSepia0266-MS-1	47	+
chr4	123235225	123235226	StrawSepia0266-MS-1	47	+	Macf1
chr4	133087494	133087495	HoneydewSepia0251-MS-1	47	-
chr4	141276382	141276383	HoneydewSepia0245-MS-1	47	+	Ddi2
chr5	53140601	53140602	HoneydewSepia0251-MS-1	47	-	Pi4k2b
chr5	77458015	77458016	StrawSepia0266-MS-1	47	+	1700023E05Rik	1700023E05Rik
chr5	137008119	137008120	HoneydewSepia0251-MS-1	47	-	Cux1	Cux1
chr5	142181947	142181948	HoneydewSepia0251-MS-1	47	-	Sdk1
chr6	32239209	32239210	StrawSepia0266-MS-1	47	+	Plxna4
chr6	63142271	63142272	StrawSepia0266-MS-1	47	-
chr6	131575207	131575208	HoneydewSepia0251-MS-1	47	-
chr8	24093683	24093684	HoneydewSepia0251-MS-1	47	-	Ank1
chr8	31646418	31646419	StrawSepia0266-MS-1	47	+
chr8	55914100	55914101	StrawSepia0266-MS-1	47	+	Gpm6a	Gpm6a
chr9	15082453	15082454	HoneydewSepia0251-MS-1	47	-	Med17	Med17
chr9	20459076	20459077	StrawSepia0266-MS-1	47	+	Pin1	Pin1
chr9	57577671	57577672	HoneydewSepia0245-MS-1	47	-	Edc3
chr9	111067588	111067589	StrawSepia0266-MS-1	47	+	Lrrfip2	Lrrfip2
chrX	142813163	142813164	HoneydewSepia0245-MS-1	47	+
chr1	31426406	31426407	StrawSepia0266-MS-1	46	+
chr1	36242596	36242597	HoneydewSepia0245-MS-1	46	-	Uggt1	Uggt1
chr1	52235183	52235184	HoneydewSepia0245-MS-1	46	-	Gls	Gls
chr1	60344218	60344219	HoneydewSepia0245-MS-1	46	-	Nbeal1
chr1	88617013	88617014	StrawSepia0266-MS-1	46	+	Dis3l2	Dis3l2
chr1	100338375	100338376	StrawSepia0266-MS-1	46	-	Slco6d1
chr1	122476302	122476303	StrawSepia0266-MS-1	46	-
chr1	136466287	136466288	StrawSepia0266-MS-1	46	+	Kdm5b	Kdm5b
chr1	147480084	147480085	StrawSepia0266-MS-1	46	-
chr1	148555352	148555353	HoneydewSepia0251-MS-1	46	-	Brinp3
chr1	157759460	157759461	StrawSepia0266-MS-1	46	+	Cep350
chr1	174090713	174090714	HoneydewSepia0245-MS-1	46	+	Dcaf8	Dcaf8
chr1	177120695	177120696	HoneydewSepia0245-MS-1	46	-	Rgs7	Rgs7
chr10	10648959	10648960	StrawSepia0266-MS-1	46	-	Grm1	Grm1
chr10	24116050	24116051	StrawSepia0266-MS-1	46	+
chr10	35794105	35794106	StrawSepia0266-MS-1	46	-
chr10	115557827	115557828	HoneydewSepia0251-MS-1	46	-	Ptprr
chr11	74413926	74413927	StrawSepia0266-MS-1	46	+
chr12	65018892	65018893	StrawSepia0266-MS-1	46	-
chr14	111604179	111604180	StrawSepia0266-MS-1	46	-
chr15	35828504	35828505	StrawSepia0266-MS-1	46	-	Vps13b
chr15	70791919	70791920	HoneydewSepia0251-MS-1	46	+
chr15	78370959	78370960	HoneydewSepia0251-MS-1	46	+	Sstr3
chr17	64137148	64137149	HoneydewSepia0251-MS-1	46	-
chr18	67717204	67717205	StrawSepia0266-MS-1	46	+
chr2	27601815	27601816	StrawSepia0266-MS-1	46	-	Rxra
chr2	37323404	37323405	HoneydewSepia0251-MS-1	46	-	Rabgap1
chr3	48563872	48563873	StrawSepia0266-MS-1	46	+
chr3	103095525	103095526	StrawSepia0266-MS-1	46	-	Trim33
chr3	105584324	105584325	HoneydewSepia0245-MS-1	46	+	Rap1a
chr3	118068624	118068625	StrawSepia0266-MS-1	46	-
chr3	156633052	156633053	HoneydewSepia0245-MS-1	46	-	Negr1
chr4	82118027	82118028	HoneydewSepia0245-MS-1	46	+	Nfib
chr5	85441155	85441156	StrawSepia0266-MS-1	46	-
chr5	116946456	116946457	HoneydewSepia0245-MS-1	46	-	Srrm4	Srrm4
chr6	3735248	3735249	HoneydewSepia0251-MS-1	46	+
chr6	21071901	21071902	StrawSepia0266-MS-1	46	-
chr7	70446405	70446406	StrawSepia0266-MS-1	46	+
chr8	11376664	11376665	StrawSepia0266-MS-1	46	-	Col4a2
chr8	40139746	40139747	HoneydewSepia0251-MS-1	46	+	Tusc3	Tusc3
chr8	76981590	76981591	StrawSepia0266-MS-1	46	+
chr8	94057619	94057620	StrawSepia0266-MS-1	46	-	Fto
chr8	105373682	105373683	StrawSepia0266-MS-1	46	-
chr9	4666805	4666806	HoneydewSepia0251-MS-1	46	-	Gria4	Gria4
chr9	65354208	65354209	StrawSepia0266-MS-1	46	+
chr9	65965782	65965783	HoneydewSepia0245-MS-1	46	+	Snx1
chr9	67961858	67961859	StrawSepia0266-MS-1	46	-
chr9	89984143	89984144	HoneydewSepia0251-MS-1	46	+
chr9	96256365	96256366	StrawSepia0266-MS-1	46	+	Atp1b3
chr9	113375510	113375511	StrawSepia0266-MS-1	46	-
chr9_random	376327	376328	HoneydewSepia0251-MS-1	46	+	Ccdc82	Ccdc82
chrX	39633223	39633224	StrawSepia0266-MS-1	46	-
chrX	81156528	81156529	StrawSepia0266-MS-1	46	-	Dmd
chrX	129018272	129018273	HoneydewSepia0251-MS-1	46	+
chrX	134673819	134673820	StrawSepia0266-MS-1	46	-	Il1rapl2
chr1	52890553	52890554	HoneydewSepia0245-MS-1	45	+
chr1	59748557	59748558	StrawSepia0266-MS-1	45	-	Nop58
chr1	64157142	64157143	HoneydewSepia0251-MS-1	45	+	Klf7
chr1	80204349	80204350	StrawSepia0266-MS-1	45	-	Fam124b	Fam124b
chr1	88451612	88451613	HoneydewSepia0251-MS-1	45	+	Pde6d
chr1	100504034	100504035	StrawSepia0266-MS-1	45	+
chr1	105178149	105178150	HoneydewSepia0245-MS-1	45	+
chr1	110031187	110031188	StrawSepia0266-MS-1	45	+
chr1	142055384	142055385	HoneydewSepia0251-MS-1	45	-	Cfh	Cfh
chr1	154713980	154713981	HoneydewSepia0251-MS-1	45	+	Smg7
chr1	161205769	161205770	StrawSepia0266-MS-1	45	-	Rfwd2
chr1	180261129	180261130	StrawSepia0266-MS-1	45	+	Hnrnpu
chr1	187190797	187190798	StrawSepia0266-MS-1	45	-	Eprs
chr10	51971875	51971876	HoneydewSepia0251-MS-1	45	-	Dcbld1
chr10	87738709	87738710	HoneydewSepia0251-MS-1	45	+
chr11	34146519	34146520	HoneydewSepia0251-MS-1	45	+	Dock2
chr11	75560787	75560788	HoneydewSepia0245-MS-1	45	+	Ywhae	Ywhae
chr11	94150523	94150524	HoneydewSepia0251-MS-1	45	-
chr12	3269236	3269237	StrawSepia0266-MS-1	45	-	Rab10	Rab10
chr12	47824779	47824780	HoneydewSepia0245-MS-1	45	+	Nova1
chr12	51702290	51702291	StrawSepia0266-MS-1	45	+	Prkd1
chr13	48595249	48595250	HoneydewSepia0245-MS-1	45	+	Zfp169
chr13	60187349	60187350	HoneydewSepia0245-MS-1	45	-	A530065N20Rik
chr13	92823186	92823187	HoneydewSepia0245-MS-1	45	-	Rasgrf2	Rasgrf2
chr14	80932010	80932011	HoneydewSepia0251-MS-1	45	-
chr14	120002511	120002512	HoneydewSepia0251-MS-1	45	-	Hs6st3
chr14	125039020	125039021	StrawSepia0266-MS-1	45	-	Fgf14	Fgf14
chr15	15296772	15296773	HoneydewSepia0251-MS-1	45	+
chr15	49293039	49293040	HoneydewSepia0251-MS-1	45	-
chr15	54685479	54685480	HoneydewSepia0251-MS-1	45	-	Enpp2	Enpp2
chr17	13184457	13184458	StrawSepia0266-MS-1	45	-	Wtap	Wtap
chr17	24999638	24999639	HoneydewSepia0245-MS-1	45	-	Hagh
chr17	32382097	32382098	StrawSepia0266-MS-1	45	-	Brd4	Brd4
chr17	86315656	86315657	StrawSepia0266-MS-1	45	-
chr2	5657961	5657962	HoneydewSepia0251-MS-1	45	-
chr2	17416822	17416823	StrawSepia0266-MS-1	45	+	Nebl
chr2	52527502	52527503	StrawSepia0266-MS-1	45	+	Cacnb4
chr2	72784946	72784947	HoneydewSepia0251-MS-1	45	+	Sp3
chr2	74591788	74591789	HoneydewSepia0251-MS-1	45	+	Haglr|LOC102634401	LOC102634401
chr2	132093504	132093505	HoneydewSepia0251-MS-1	45	+	Cds2	Cds2
chr3	57036296	57036297	StrawSepia0266-MS-1	45	-
chr3	94353129	94353130	StrawSepia0266-MS-1	45	-	Snx27	Snx27
chr4	58456051	58456052	HoneydewSepia0251-MS-1	45	-	Lpar1	Lpar1
chr4	85414916	85414917	StrawSepia0266-MS-1	45	-
chr5	9362302	9362303	StrawSepia0266-MS-1	45	-	9330182L06Rik
chr5	13399220	13399221	HoneydewSepia0245-MS-1	45	+	Sema3a	Sema3a
chr5	58250596	58250597	StrawSepia0266-MS-1	45	-	Pcdh7
chr5	136497169	136497170	StrawSepia0266-MS-1	45	-	Dtx2
chr6	91799573	91799574	StrawSepia0266-MS-1	45	+
chr7	64818614	64818615	StrawSepia0266-MS-1	45	-
chr7	66538089	66538090	StrawSepia0266-MS-1	45	+	A230073K19Rik|Ube3a	Ube3a
chr7	88671125	88671126	StrawSepia0266-MS-1	45	+	2900076A07Rik	2900076A07Rik
chr8	82025572	82025573	StrawSepia0266-MS-1	45	-
chr9	21382326	21382327	StrawSepia0266-MS-1	45	+	Carm1	Carm1
chrX	135989922	135989923	StrawSepia0266-MS-1	45	+
chr1	12811800	12811801	HoneydewSepia0245-MS-1	44	+	Sulf1	Sulf1
chr1	16565991	16565992	HoneydewSepia0251-MS-1	44	+	Ube2w
chr1	25552953	25552954	HoneydewSepia0245-MS-1	44	-	Adgrb3	Adgrb3
chr1	26829872	26829873	HoneydewSepia0251-MS-1	44	+
chr1	36580245	36580246	StrawSepia0266-MS-1	44	+	Cnnm3	Cnnm3
chr1	49619945	49619946	HoneydewSepia0251-MS-1	44	+
chr1	80314303	80314304	HoneydewSepia0251-MS-1	44	+	Cul3
chr1	127270582	127270583	HoneydewSepia0251-MS-1	44	+
chr1	132230001	132230002	HoneydewSepia0251-MS-1	44	-
chr1	143767281	143767282	HoneydewSepia0251-MS-1	44	-
chr1	145383044	145383045	HoneydewSepia0251-MS-1	44	+
chr1	153336899	153336900	HoneydewSepia0245-MS-1	44	+	Rnf2
chr1	157200197	157200198	HoneydewSepia0251-MS-1	44	-	Xpr1	Xpr1
chr1	159295236	159295237	StrawSepia0266-MS-1	44	+	Rasal2
chr1	174134559	174134560	StrawSepia0266-MS-1	44	-	Pea15a	Pea15a
chr10	11390546	11390547	HoneydewSepia0251-MS-1	44	+
chr10	19849434	19849435	HoneydewSepia0251-MS-1	44	-	Map3k5
chr11	8510644	8510645	StrawSepia0266-MS-1	44	+	Tns3
chr11	27562988	27562989	StrawSepia0266-MS-1	44	+
chr11	82427169	82427170	HoneydewSepia0251-MS-1	44	+
chr11	116423027	116423028	HoneydewSepia0245-MS-1	44	+	Ube2o
chr12	57444660	57444661	StrawSepia0266-MS-1	44	+	Mbip
chr12	66068799	66068800	StrawSepia0266-MS-1	44	+	Fam179b	Fam179b
chr14	23109616	23109617	HoneydewSepia0245-MS-1	44	+	1700112E06Rik	1700112E06Rik
chr14	61580972	61580973	StrawSepia0266-MS-1	44	+
chr14	121775504	121775505	StrawSepia0266-MS-1	44	+	Stk24
chr15	66937858	66937859	StrawSepia0266-MS-1	44	-	St3gal1	St3gal1
chr15	97100667	97100668	StrawSepia0269-MS-2	44	+	Pced1b	Pced1b
chr15	99639304	99639305	HoneydewSepia0251-MS-1	44	-	Lima1	Lima1
chr16	7151932	7151933	HoneydewSepia0251-MS-1	44	+	Rbfox1	Rbfox1
chr16	22094403	22094404	HoneydewSepia0251-MS-1	44	-	Igf2bp2	Igf2bp2
chr16	49853144	49853145	HoneydewSepia0251-MS-1	44	+
chr16	50146557	50146558	HoneydewSepia0251-MS-1	44	+
chr16	53898249	53898250	HoneydewSepia0245-MS-1	44	+
chr16	65487751	65487752	StrawSepia0266-MS-1	44	+
chr17	89546600	89546601	HoneydewSepia0251-MS-1	44	-	Fshr	Fshr
chr18	51386167	51386168	StrawSepia0266-MS-1	44	+	Prr16	Prr16
chr2	24255355	24255356	StrawSepia0266-MS-1	44	+	Psd4	Psd4
chr2	26346378	26346379	HoneydewSepia0251-MS-1	44	+	Notch1
chr2	62565356	62565357	StrawSepia0266-MS-1	44	+	Kcnh7
chr2	134859098	134859099	StrawSepia0266-MS-1	44	-	Plcb1
chr2	144089075	144089076	HoneydewSepia0245-MS-1	44	+	Snx5
chr2	181258905	181258906	StrawSepia0266-MS-1	44	-	Dnajc5
chr3	8914556	8914557	StrawSepia0266-MS-1	44	-	Mrps28	Mrps28
chr3	41579207	41579208	StrawSepia0266-MS-1	44	+
chr3	133695125	133695126	StrawSepia0266-MS-1	44	+
chr4	50244625	50244626	StrawSepia0266-MS-1	44	-
chr4	119237130	119237131	StrawSepia0266-MS-1	44	-	Foxj3
chr4	137586213	137586214	StrawSepia0266-MS-1	44	-	Eif4g3
chr5	3508429	3508430	HoneydewSepia0245-MS-1	44	-	Cdk6
chr5	6636849	6636850	StrawSepia0266-MS-1	44	-
[truncated: 20,504 more rows]

## Sheet: ST5
Chr	start	end	TumorID	reads	strand	gene(s)	gene_direction_activating
chrX	39605079	39605080	HoneydewSepia0187-MS-2	4001	-	Stag2
chr1	20063295	20063296	HoneydewSepia0187-MS-2	3310	+	Pkhd1
chr1	146395897	146395898	HoneydewSepia0187-MS-2	3199	+	Rgs21
chr6	31352524	31352525	HoneydewSepia0187-MS-2	2591	-	Mkln1
chr7	134679005	134679006	HoneydewSepia0187-MS-2	2270	+	Srcap	Srcap
chr11	88483368	88483369	HoneydewSepia0187-MS-2	1946	+	0610039H22Rik|Msi2	0610039H22Rik
chr4	136096115	136096116	HoneydewSepia0187-MS-2	1615	+	Luzp1	Luzp1
chr1	115337193	115337194	HoneydewSepia0236-MS-3	1517	-
chr5	34741220	34741221	HoneydewSepia0187-MS-2	1377	+	Fam193a	Fam193a
chr4	83108343	83108344	HoneydewSepia0187-MS-2	1315	-	Psip1	Psip1
chr12	5024111	5024112	HoneydewSepia0187-MS-2	956	+	Atad2b	Atad2b
chr7	35469387	35469388	HoneydewSepia0187-MS-2	901	+	Chst8
chr1	54885670	54885671	HoneydewSepia0236-MS-3	857	-	Ankrd44	Ankrd44
chr2	27530399	27530400	HoneydewSepia0236-MS-3	757	-
chr17	8955239	8955240	HoneydewSepia0236-MS-3	723	+	Pde10a	Pde10a
chr11	79886884	79886885	HoneydewSepia0236-MS-3	684	+	Crlf3
chr1	180165909	180165910	HoneydewSepia0236-MS-3	657	+	Desi2	Desi2
chr1	133489946	133489947	HoneydewSepia0236-MS-3	652	-
chr11	117629382	117629383	HoneydewSepia0236-MS-3	648	+	Tmc6
chr1	173388569	173388570	HoneydewSepia0187-MS-2	643	-	F11r
chr1	21241597	21241598	HoneydewSepia0236-MS-3	641	-	Gsta3
chr9	56688234	56688235	HoneydewSepia0236-MS-3	638	-
chr17	66412336	66412337	HoneyDewSepia0187-MS-3	627	-	Ankrd12	Ankrd12
chr1	129429878	129429879	HoneydewSepia0236-MS-3	598	+	Tmem163
chr1	181730148	181730149	HoneydewSepia0236-MS-3	598	-	Ahctf1	Ahctf1
chr3	100859724	100859725	HoneydewSepia0236-MS-3	594	-	Ptgfrn	Ptgfrn
chr4	8150077	8150078	HoneyDewSepia0187-MS-3	578	+	Car8
chr16	38105278	38105279	HoneyDewSepia0187-MS-3	577	+	Gsk3b	Gsk3b
chr9	117206249	117206250	HoneydewSepia0236-MS-3	555	-	Rbms3	Rbms3
chr11	52758678	52758679	HoneydewSepia0236-MS-3	540	-	Fstl4
chr1	132637259	132637260	HoneyDewSepia0187-MS-3	537	+	AA986860	AA986860
chr2	130526322	130526323	HoneydewSepia0236-MS-3	528	-
chr1	122829453	122829454	HoneydewSepia0187-MS-2	524	-
chr12	8704844	8704845	HoneydewSepia0187-MS-2	517	+	Pum2	Pum2
chr4	132705130	132705131	HoneydewSepia0187-MS-2	512	+	Wasf2	Wasf2
chr5	118962569	118962570	HoneydewSepia0236-MS-3	508	-
chrX	91344462	91344463	HoneydewSepia0187-MS-2	503	+	Zfx
chr1	174075630	174075631	HoneyDewSepia0187-MS-3	500	-
chr1	96237291	96237292	HoneydewSepia0187-MS-2	499	+
chr13	42168488	42168489	HoneydewSepia0236-MS-3	488	+	Hivep1	Hivep1
chr7	137830376	137830377	HoneydewSepia0187-MS-2	485	-	Tacc2
chr1	59026593	59026594	HoneydewSepia0236-MS-3	483	+	Trak2
chr14	70533501	70533502	HoneydewSepia0236-MS-3	479	-	Bin3
chr9	21187034	21187035	HoneydewSepia0236-MS-3	478	-	Ilf3
chr10	18448173	18448174	HoneydewSepia0236-MS-3	471	-	Arfgef3	Arfgef3
chr1	163893976	163893977	HoneydewSepia0236-MS-2	461	-	4930558K02Rik	4930558K02Rik
chr7	135065908	135065909	HoneydewSepia0187-MS-2	457	-	Kat8
chr16	16996817	16996818	HoneydewSepia0236-MS-3	449	-	Mapk1
chr12	52788716	52788717	HoneydewSepia0187-MS-2	446	+	Strn3
chr12	30044557	30044558	HoneydewSepia0236-MS-3	427	-
chr12	9004499	9004500	HoneydewSepia0236-MS-3	425	+	Wdr35	Wdr35
chr15	32342524	32342525	HoneydewSepia0236-MS-3	423	+	Sema5a	Sema5a
chr1	89797535	89797536	HoneydewSepia0236-MS-3	417	+	Dgkd	Dgkd
chr10	12730363	12730364	HoneydewSepia0236-MS-3	414	-
chrX	109797399	109797400	HoneydewSepia0236-MS-3	413	-	Pof1b	Pof1b
chr1	167144002	167144003	HoneyDewSepia0187-MS-3	412	+	Tiprl
chr1	153266737	153266738	HoneyDewSepia0187-MS-3	411	+	Swt1
chr1	58363377	58363378	HoneydewSepia0236-MS-3	402	+	Aox2	Aox2
chr1	140504172	140504173	HoneydewSepia0236-MS-3	388	-	Nek7	Nek7
chr1	24769598	24769599	HoneydewSepia0236-MS-3	387	-	Lmbrd1
chr19	16280287	16280288	HoneydewSepia0236-MS-3	375	+	Gnaq	Gnaq
chr15	63816297	63816298	HoneydewSepia0187-MS-2	364	+	Fam49b
chr1	89797535	89797536	HoneyDewSepia0236-MS-1	360	+	Dgkd	Dgkd
chr1	62054427	62054428	HoneydewSepia0236-MS-3	359	+	Pard3b	Pard3b
chr6	32502606	32502607	HoneydewSepia0236-MS-3	354	+	Plxna4
chr1	183129323	183129324	HoneydewSepia0236-MS-3	341	+	Wdr26
chr12	102306590	102306591	HoneydewSepia0236-MS-3	338	-	Smek1	Smek1
chr1	165667678	165667679	HoneydewSepia0236-MS-3	335	-
chr5	141285356	141285357	HoneydewSepia0236-MS-3	331	-	Gna12	Gna12
chr5	89045149	89045150	HoneydewSepia0236-MS-3	323	+	Rufy3	Rufy3
chr1	183129323	183129324	HoneyDewSepia0236-MS-1	317	+	Wdr26
chr4	98591389	98591390	HoneyDewSepia0187-MS-3	311	-	Usp1
chr15	102251823	102251824	HoneydewSepia0236-MS-3	305	+	Sp1	Sp1
chr6	114843280	114843281	HoneydewSepia0187-MS-2	303	+	Vgll4
chr7	99809810	99809811	HoneydewSepia0187-MS-2	303	-	Pcf11	Pcf11
chr10	18448173	18448174	HoneyDewSepia0236-MS-1	295	-	Arfgef3	Arfgef3
chr18	10167241	10167242	HoneyDewSepia0187-MS-3	295	+	Rock1
chr2	27530399	27530400	HoneyDewSepia0236-MS-1	295	-
chr2	137116770	137116771	HoneyDewSepia0187-MS-3	294	-
chr4	50932914	50932915	HoneydewSepia0187-MS-2	293	-
chr4	34806947	34806948	HoneydewSepia0236-MS-3	291	+	Zfp292
chr2	87943744	87943745	HoneyDewSepia0187-MS-3	278	-
chr12	86978605	86978606	HoneydewSepia0236-MS-3	266	+	Jdp2	Jdp2
chr10	99660677	99660678	HoneydewSepia0236-MS-3	260	+
chr13	105435848	105435849	HoneydewSepia0236-MS-3	259	-	Cwc27	Cwc27
chrX	126957542	126957543	HoneydewSepia0236-MS-3	259	+	Diap2	Diap2
chr16	91666113	91666114	HoneydewSepia0187-MS-2	257	+	Son	Son
chr11	117629382	117629383	HoneyDewSepia0236-MS-1	255	+	Tmc6
chr7	87226973	87226974	HoneydewSepia0236-MS-3	255	-	Zfp710
chr1	129429878	129429879	HoneyDewSepia0236-MS-1	252	+	Tmem163
chr14	77545393	77545394	HoneydewSepia0236-MS-3	251	+
chr2	155986455	155986456	HoneyDewSepia0187-MS-3	249	-	Rbm39	Rbm39
chr1	58149235	58149236	HoneyDewSepia0236-MS-1	244	-	Aox1
chr15	77603114	77603115	HoneydewSepia0187-MS-2	244	+	Myh9
chr1	101427152	101427153	HoneyDewSepia0187-MS-3	241	-
chr1	84832239	84832240	HoneydewSepia0236-MS-3	240	+	Trip12
chr1	58149235	58149236	HoneydewSepia0236-MS-3	238	-	Aox1
chr3	25956992	25956993	HoneydewSepia0187-MS-2	237	+	Nlgn1
chr12	103824099	103824100	HoneydewSepia0236-MS-3	236	+	Itpk1
chr1	58363377	58363378	HoneyDewSepia0236-MS-1	232	+	Aox2	Aox2
chr1	174036275	174036276	HoneydewSepia0236-MS-3	232	-	Copa
chr12	85846414	85846415	HoneyDewSepia0187-MS-3	231	-	Lin52
chr12	118934734	118934735	HoneyDewSepia0236-MS-1	225	+	Rapgef5	Rapgef5
chr15	81731333	81731334	HoneydewSepia0236-MS-3	225	-	Aco2
chr7	137306798	137306799	HoneydewSepia0236-MS-3	221	-	Fgfr2	Fgfr2
chr1	148679594	148679595	HoneydewSepia0187-MS-2	220	+	Brinp3	Brinp3
chr2	18048038	18048039	HoneydewSepia0236-MS-2	220	-	Mllt10
chr5	125612919	125612920	HoneydewSepia0187-MS-2	218	-	Ncor2	Ncor2
chr13	116098809	116098810	HoneydewSepia0236-MS-3	217	+
chr11	80200494	80200495	HoneydewSepia0187-MS-2	216	-	Zfp207
chr1	196484315	196484316	HoneydewSepia0236-MS-3	214	-	Plxna2
chr4	48606365	48606366	HoneydewSepia0187-MS-2	214	-	Tmeff1
chr7	56548973	56548974	HoneydewSepia0236-MS-3	211	+	Nav2	Nav2
chr11	70828219	70828220	HoneydewSepia0236-MS-3	202	-	Derl2	Derl2
chr3	100859724	100859725	HoneydewSepia0236-MS-2	202	-	Ptgfrn	Ptgfrn
chr3	100859724	100859725	HoneyDewSepia0236-MS-1	202	-	Ptgfrn	Ptgfrn
chr9	6361524	6361525	HoneydewSepia0236-MS-3	202	+	Pdgfd	Pdgfd
chr6	143156815	143156816	HoneydewSepia0236-MS-3	201	-	Etnk1
chr1	54885670	54885671	HoneyDewSepia0236-MS-1	200	-	Ankrd44	Ankrd44
chr14	31460276	31460277	HoneydewSepia0236-MS-3	200	-
chr15	19588001	19588002	HoneydewSepia0236-MS-3	200	+
chr16	16996817	16996818	HoneyDewSepia0236-MS-1	200	-	Mapk1
chr12	33512275	33512276	HoneyDewSepia0236-MS-1	199	-	Nampt
chr9	21187034	21187035	HoneyDewSepia0236-MS-1	198	-	Ilf3
chr1	105381878	105381879	HoneydewSepia0187-MS-2	197	-
chr1	171342845	171342846	HoneydewSepia0187-MS-2	197	+
chr17	3216646	3216647	HoneyDewSepia0187-MS-3	197	-
chr4	34806947	34806948	HoneyDewSepia0236-MS-1	196	+	Zfp292
chr7	63455162	63455163	HoneydewSepia0236-MS-3	196	+	Herc2	Herc2
chr11	67880237	67880238	HoneydewSepia0236-MS-3	195	-	Stx8
chr12	56482028	56482029	HoneydewSepia0236-MS-3	194	+	1110008L16Rik	1110008L16Rik
chr12	118934734	118934735	HoneydewSepia0236-MS-3	192	+	Rapgef5	Rapgef5
chr8	62376370	62376371	HoneydewSepia0236-MS-3	192	-
chr17	5252152	5252153	HoneydewSepia0187-MS-2	191	-	Arid1b
chr17	40953332	40953333	HoneydewSepia0187-MS-2	191	+	Rhag	Rhag
chr2	102680703	102680704	HoneydewSepia0236-MS-3	191	+	Cd44
chr11	52758678	52758679	HoneyDewSepia0236-MS-1	190	-	Fstl4
chr1	80310678	80310679	HoneyDewSepia0187-MS-3	189	-	Cul3	Cul3
chr1	80328839	80328840	HoneyDewSepia0187-MS-3	188	-	Cul3	Cul3
chr11	79886884	79886885	HoneyDewSepia0236-MS-1	187	+	Crlf3
chr5	91628504	91628505	HoneydewSepia0236-MS-2	186	-
chr1	30041956	30041957	HoneydewSepia0187-MS-2	184	+
chr8	130439038	130439039	HoneydewSepia0187-MS-2	183	+
chr9	89987654	89987655	HoneydewSepia0236-MS-3	182	+	Morf4l1
chr12	102306590	102306591	HoneyDewSepia0236-MS-1	181	-	Smek1	Smek1
chr4	59224852	59224853	HoneydewSepia0236-MS-2	181	-	Ugcg
chrX	12702258	12702259	HoneydewSepia0236-MS-3	181	-	Usp9x
chr2	130526322	130526323	HoneyDewSepia0236-MS-1	180	-
chr4	135910318	135910319	HoneydewSepia0187-MS-2	179	+
chrX	45763919	45763920	HoneydewSepia0187-MS-2	178	+
chr19	16280287	16280288	HoneyDewSepia0236-MS-1	175	+	Gnaq	Gnaq
chr9	117206249	117206250	HoneyDewSepia0236-MS-1	175	-	Rbms3	Rbms3
chr15	102251823	102251824	HoneyDewSepia0236-MS-1	174	+	Sp1	Sp1
chr19	50270250	50270251	HoneydewSepia0236-MS-3	174	+	Sorcs1
chr10	16650833	16650834	HoneydewSepia0236-MS-3	173	-
chr10	79780902	79780903	HoneydewSepia0236-MS-3	173	+	Apc2	Apc2
chrX	35780479	35780480	HoneydewSepia0236-MS-3	173	+	Lamp2
chr14	66805846	66805847	HoneydewSepia0187-MS-2	172	-	Ptk2b	Ptk2b
chr1	188565270	188565271	HoneydewSepia0236-MS-3	171	+	Rrp15
chr10	24707908	24707909	HoneydewSepia0236-MS-3	170	-
chr1	162653308	162653309	HoneydewSepia0187-MS-2	169	+	Rabgap1l
chr8	102110053	102110054	HoneydewSepia0236-MS-2	169	-
chr11	36846456	36846457	HoneyDewSepia0236-MS-1	168	+
chr15	43079072	43079073	HoneydewSepia0236-MS-3	167	-
chr7	137830206	137830207	HoneydewSepia0187-MS-2	167	+	Tacc2	Tacc2
chr10	16650833	16650834	HoneyDewSepia0236-MS-1	166	-
chr8	51217862	51217863	HoneydewSepia0236-MS-3	166	-
chr1	98945570	98945571	HoneydewSepia0187-MS-2	165	+
chr5	151466346	151466347	HoneydewSepia0187-MS-2	165	-	N4bp2l2	N4bp2l2
chr1	16577079	16577080	HoneydewSepia0187-MS-2	164	-	Ube2w	Ube2w
chr16	79306715	79306716	HoneydewSepia0236-MS-3	164	+
chr17	3192580	3192581	HoneydewSepia0236-MS-3	163	-	Scaf8
chr7	151802588	151802589	HoneydewSepia0187-MS-2	163	-	Ano1	Ano1
chr1	170184339	170184340	HoneydewSepia0236-MS-2	162	-	Pbx1	Pbx1
chr12	56437795	56437796	HoneyDewSepia0187-MS-3	162	-	1110008L16Rik
chr16	20829305	20829306	HoneydewSepia0187-MS-2	161	-
chr7	137827474	137827475	HoneydewSepia0187-MS-2	161	-	Tacc2
chr10	72863189	72863190	HoneydewSepia0236-MS-3	159	-
chr15	93718954	93718955	HoneydewSepia0187-MS-2	159	-
chr6	110014790	110014791	HoneydewSepia0187-MS-2	159	-
chr16	25843080	25843081	HoneydewSepia0236-MS-3	158	-	Trp63
chr3	6439530	6439531	HoneydewSepia0187-MS-2	158	+
chr3	21637424	21637425	HoneydewSepia0236-MS-3	158	-
chr12	8139319	8139320	HoneydewSepia0236-MS-3	157	-
chr1	144350336	144350337	HoneydewSepia0187-MS-2	156	+
chr7	134017954	134017955	HoneydewSepia0187-MS-2	156	-	Taok2	Taok2
chr1	21241597	21241598	HoneyDewSepia0236-MS-1	155	-	Gsta3
chr1	84833595	84833596	HoneydewSepia0187-MS-2	155	+	Trip12
chr12	33512279	33512280	HoneydewSepia0236-MS-3	155	-	Nampt
chr2	155031608	155031609	HoneydewSepia0187-MS-2	155	+	Itch	Itch
chr6	82723909	82723910	HoneydewSepia0187-MS-2	154	-	Hk2	Hk2
chr6	92004181	92004182	HoneydewSepia0236-MS-3	154	-	Fgd5
chr1	58363377	58363378	HoneydewSepia0236-MS-2	153	+	Aox2	Aox2
chr1	163893976	163893977	HoneydewSepia0236-MS-3	153	-	4930558K02Rik	4930558K02Rik
chr1	164600102	164600103	HoneydewSepia0236-MS-3	153	+
chr3	89832087	89832088	HoneydewSepia0236-MS-3	153	+	Ubap2l
chr7	137306798	137306799	HoneyDewSepia0236-MS-1	153	-	Fgfr2	Fgfr2
chrX	91343486	91343487	HoneydewSepia0187-MS-2	153	-	Zfx	Zfx
chr13	42168488	42168489	HoneyDewSepia0236-MS-1	152	+	Hivep1	Hivep1
chr2	166811177	166811178	HoneydewSepia0236-MS-2	152	-	Stau1	Stau1
chr5	66480029	66480030	HoneydewSepia0236-MS-3	152	-	Rbm47	Rbm47
chr1	117673371	117673372	HoneydewSepia0236-MS-2	151	+	Cntnap5a	Cntnap5a
chr17	65932342	65932343	HoneydewSepia0236-MS-2	151	+	Vapa
chr18	12315578	12315579	HoneyDewSepia0236-MS-1	151	+	Riok3	Riok3
chr2	5912993	5912994	HoneydewSepia0187-MS-2	151	-	Upf2
chr3	115675438	115675439	HoneydewSepia0236-MS-2	151	+	Slc30a7
chr15	58784734	58784735	HoneydewSepia0236-MS-3	150	-	Mtss1	Mtss1
chr2	79539955	79539956	HoneydewSepia0236-MS-3	150	+
chr4	11073235	11073236	HoneydewSepia0236-MS-3	150	+
chr4	56302740	56302741	HoneydewSepia0236-MS-3	150	-
chr1	70956644	70956645	HoneydewSepia0236-MS-2	149	-
chr10	77048832	77048833	HoneydewSepia0187-MS-2	149	-	Pttg1ip
chr13	110861077	110861078	HoneydewSepia0236-MS-2	149	+	Rab3c
chr2	98590252	98590253	HoneydewSepia0236-MS-3	149	-
chr3	151826408	151826409	HoneydewSepia0187-MS-2	149	+	Gipc2
chr6	16200753	16200754	HoneydewSepia0236-MS-3	149	-
chrX	157493807	157493808	HoneydewSepia0187-MS-2	149	+
chr11	79886884	79886885	HoneydewSepia0236-MS-2	148	+	Crlf3
chr16	44082466	44082467	HoneydewSepia0187-MS-2	148	+
chr2	171356644	171356645	HoneydewSepia0236-MS-2	148	+
chr8	92092309	92092310	HoneydewSepia0236-MS-3	148	+
chr1	102629481	102629482	HoneydewSepia0236-MS-3	147	-
chr11	40976706	40976707	HoneydewSepia0236-MS-3	147	+
chr8	111165075	111165076	HoneydewSepia0236-MS-3	147	-
chr1	169617099	169617100	HoneydewSepia0187-MS-2	146	+
chr19	38805259	38805260	HoneydewSepia0187-MS-2	146	-	Plce1
chr12	85552389	85552390	HoneydewSepia0236-MS-2	145	-	Elmsan1	Elmsan1
chr15	5751241	5751242	HoneydewSepia0236-MS-2	145	+
chr2	151822950	151822951	HoneydewSepia0187-MS-2	145	+	Slc52a3	Slc52a3
chr5	136820678	136820679	HoneydewSepia0187-MS-2	145	+	Cux1
chr10	14138687	14138688	HoneydewSepia0236-MS-3	144	+	Adgrg6
chr10	64345963	64345964	HoneydewSepia0187-MS-2	144	+	Ctnna3	Ctnna3
chr1	84744616	84744617	HoneydewSepia0187-MS-2	143	+	Trip12
chr1	108077328	108077329	HoneydewSepia0236-MS-3	143	+	Phlpp1	Phlpp1
chr9	60330534	60330535	HoneydewSepia0236-MS-3	143	+	Thsd4
chr1	114044624	114044625	HoneydewSepia0187-MS-2	142	+
chr1	151770684	151770685	HoneydewSepia0187-MS-2	142	-	Pla2g4a	Pla2g4a
chr11	101414881	101414882	HoneydewSepia0236-MS-3	142	-	Nbr1
chr15	13343343	13343344	HoneydewSepia0187-MS-2	142	-
chr2	4909164	4909165	HoneydewSepia0187-MS-2	142	-
chr3	114988217	114988218	HoneydewSepia0236-MS-2	142	-
chr6	63296876	63296877	HoneydewSepia0236-MS-3	142	+	Grid2	Grid2
chr7	145839081	145839082	HoneydewSepia0236-MS-3	142	+
chr9	109966955	109966956	HoneydewSepia0187-MS-2	142	-	Map4
chr1	74629196	74629197	HoneydewSepia0187-MS-2	141	+	Zfp142
chr1	80257124	80257125	HoneyDewSepia0187-MS-3	141	+
chr1	84829456	84829457	HoneydewSepia0236-MS-2	141	-	Trip12	Trip12
chr14	103870772	103870773	HoneydewSepia0236-MS-2	141	+
chr18	31042127	31042128	HoneydewSepia0236-MS-2	140	-
chr5	22963043	22963044	HoneydewSepia0187-MS-2	140	-	Kmt2e
chr5	151374169	151374170	HoneydewSepia0236-MS-3	140	-
chr6	108059438	108059439	HoneydewSepia0236-MS-3	140	-	Sumf1	Sumf1
chr9	102992767	102992768	HoneydewSepia0236-MS-3	140	+
chr1	64889206	64889207	HoneydewSepia0187-MS-2	139	-	Plekhm3	Plekhm3
chr16	8049077	8049078	HoneydewSepia0187-MS-2	139	-
chr5	78347720	78347721	HoneydewSepia0187-MS-2	139	+
chr6	114826849	114826850	HoneydewSepia0236-MS-3	139	-	Vgll4	Vgll4
chr7	137238082	137238083	HoneydewSepia0236-MS-3	139	-
chr1	114896960	114896961	HoneydewSepia0187-MS-2	137	+
chr17	70332595	70332596	HoneydewSepia0236-MS-3	137	+
chr10	12730363	12730364	HoneyDewSepia0236-MS-1	136	-
chr12	8139319	8139320	HoneyDewSepia0236-MS-1	136	-
chr12	8685154	8685155	HoneydewSepia0187-MS-2	136	-	Pum2
chr12	32888078	32888079	HoneydewSepia0187-MS-2	136	+	Pik3cg
chr13	26112731	26112732	HoneydewSepia0236-MS-2	136	+
chr17	67303324	67303325	HoneydewSepia0236-MS-3	136	+	Ptprm
chr2	102680703	102680704	HoneyDewSepia0236-MS-1	136	+	Cd44
chr5	117668331	117668332	HoneydewSepia0236-MS-3	136	+	Taok3	Taok3
chr6	105531916	105531917	HoneydewSepia0187-MS-2	136	+
chr1	140504172	140504173	HoneyDewSepia0236-MS-1	135	-	Nek7	Nek7
chr10	103788081	103788082	HoneydewSepia0236-MS-3	135	+
chr15	80608289	80608290	HoneydewSepia0236-MS-3	135	+	Tnrc6b	Tnrc6b
chr1	133489946	133489947	HoneyDewSepia0236-MS-1	134	-
chr1	145466942	145466943	HoneyDewSepia0187-MS-3	134	-	Cdc73	Cdc73
chr17	42129382	42129383	HoneydewSepia0236-MS-3	134	+
chr3	94315684	94315685	HoneydewSepia0236-MS-3	134	-	Snx27	Snx27
chr5	33827204	33827205	HoneydewSepia0236-MS-3	134	-
chr7	63455162	63455163	HoneyDewSepia0236-MS-1	134	+	Herc2	Herc2
chr1	36268703	36268704	HoneydewSepia0187-MS-2	133	-	Uggt1	Uggt1
chr1	154725054	154725055	HoneydewSepia0187-MS-2	133	-	Smg7	Smg7
chr1	194030388	194030389	HoneydewSepia0236-MS-2	133	+	Kcnh1	Kcnh1
chr10	8027622	8027623	HoneydewSepia0236-MS-2	133	+	Ust
chr16	32104607	32104608	HoneydewSepia0187-MS-2	133	-	Cep19
chr7	151664640	151664641	HoneydewSepia0236-MS-2	133	+	Ppfia1
chr9	58845411	58845412	HoneydewSepia0187-MS-2	133	-	Neo1	Neo1
chr16	34999791	34999792	HoneydewSepia0236-MS-2	132	+	Mylk	Mylk
chr5	125496578	125496579	HoneydewSepia0187-MS-2	132	-
chr7	13857351	13857352	HoneydewSepia0187-MS-2	132	+	6330408A02Rik
chr7	135114655	135114656	HoneydewSepia0187-MS-2	132	+	Fus	Fus
chr8	59923372	59923373	HoneydewSepia0236-MS-3	132	-
chr9	56688234	56688235	HoneyDewSepia0236-MS-1	132	-
chrX	12690220	12690221	HoneydewSepia0187-MS-2	132	-	Usp9x
chr10	91620968	91620969	HoneydewSepia0187-MS-2	130	-	Rmst	Rmst
chr11	86111441	86111442	HoneydewSepia0187-MS-2	130	+	Brip1os|Med13	Brip1os
chr17	81122846	81122847	HoneydewSepia0187-MS-2	130	+	Map4k3
chr2	59627828	59627829	HoneydewSepia0187-MS-2	130	+	Tanc1	Tanc1
chr1	10590335	10590336	HoneydewSepia0236-MS-3	129	-	Cpa6	Cpa6
chr1	79150220	79150221	HoneydewSepia0236-MS-3	129	+
chr1	178356661	178356662	HoneydewSepia0236-MS-3	129	+
chr14	81310581	81310582	HoneydewSepia0187-MS-2	129	+
chr17	41755703	41755704	HoneydewSepia0187-MS-2	129	+
chr2	34874600	34874601	HoneydewSepia0187-MS-2	129	+	Hc
chr3	135127084	135127085	HoneydewSepia0187-MS-2	129	-	Ube2d3
chr5	20422887	20422888	HoneydewSepia0187-MS-2	129	-	Rsbn1l	Rsbn1l
chr8	59047932	59047933	HoneydewSepia0187-MS-2	129	-	Fbxo8
chr1	117854780	117854781	HoneydewSepia0187-MS-2	128	-	Cntnap5a
chr1	137415872	137415873	HoneydewSepia0236-MS-3	128	-	Nav1	Nav1
chr13	85659216	85659217	HoneydewSepia0187-MS-2	128	+
chr2	31898675	31898676	HoneydewSepia0236-MS-3	128	-	Nup214
chr6	148143107	148143108	HoneydewSepia0187-MS-2	128	+	Ergic2
chr8	63831374	63831375	HoneydewSepia0236-MS-3	128	-	Sh3rf1
chr1	34214423	34214424	HoneydewSepia0236-MS-3	127	-	Dst
chr1	176457063	176457064	HoneydewSepia0236-MS-2	127	+	Fmn2	Fmn2
chr12	87591331	87591332	HoneydewSepia0236-MS-3	127	+	Gpatch2l	Gpatch2l
chr19	19333077	19333078	HoneydewSepia0187-MS-2	127	+
chr5	129304374	129304375	HoneydewSepia0236-MS-3	127	-	Rimbp2	Rimbp2
chr6	134458339	134458340	HoneydewSepia0236-MS-2	127	-	Lrp6	Lrp6
chr7	135066801	135066802	HoneydewSepia0187-MS-2	127	+	Kat8	Kat8
chrX	104045424	104045425	HoneydewSepia0187-MS-2	127	-
chr1	82665445	82665446	HoneydewSepia0236-MS-3	126	-	Col4a3
chr1	117448468	117448469	HoneydewSepia0236-MS-3	126	-
chr1	118908984	118908985	HoneydewSepia0236-MS-3	126	+
chr1	154690241	154690242	HoneydewSepia0187-MS-2	126	+	Smg7
chr1	161978718	161978719	HoneydewSepia0236-MS-2	126	+	4930523C07Rik	4930523C07Rik
chr12	66629673	66629674	HoneydewSepia0236-MS-3	126	-
chr14	121940821	121940822	HoneydewSepia0236-MS-2	126	-
chr2	65583182	65583183	HoneydewSepia0236-MS-3	126	-	Scn2a1
chr5	23265800	23265801	HoneydewSepia0236-MS-3	126	-	Pus7	Pus7
chr9	48831916	48831917	HoneydewSepia0187-MS-2	126	+	Usp28	Usp28
chr1	6732755	6732756	HoneydewSepia0187-MS-2	125	-	St18
chr1	130225514	130225515	HoneydewSepia0236-MS-3	125	+
chr1	148184402	148184403	HoneydewSepia0236-MS-3	125	+
chr13	51407112	51407113	HoneydewSepia0236-MS-3	125	-
chr2	81905866	81905867	HoneydewSepia0236-MS-3	125	-	Zfp804a
chr8	102097098	102097099	HoneydewSepia0236-MS-2	125	-
chr1	36368623	36368624	HoneydewSepia0187-MS-2	124	-	Arid5a
chr1	65730719	65730720	HoneydewSepia0236-MS-3	124	+
chr1	168274998	168274999	HoneydewSepia0187-MS-2	124	+
chr10	125473548	125473549	HoneydewSepia0187-MS-2	124	+
chr13	20610225	20610226	HoneydewSepia0236-MS-3	124	+	Elmo1	Elmo1
chr13	26951529	26951530	HoneydewSepia0187-MS-2	124	-
chr16	75202728	75202729	HoneydewSepia0187-MS-2	124	+
chr17	24811282	24811283	HoneydewSepia0187-MS-2	124	+	Zfp598	Zfp598
chr6	32502606	32502607	HoneyDewSepia0236-MS-1	124	+	Plxna4
chr8	14687007	14687008	HoneydewSepia0187-MS-2	124	-	Dlgap2
chr1	105974869	105974870	HoneydewSepia0236-MS-2	123	+
chr1	113518232	113518233	HoneydewSepia0187-MS-2	123	-
chr13	7263876	7263877	HoneydewSepia0236-MS-2	123	+
chr16	27789730	27789731	HoneydewSepia0187-MS-2	123	+
chr18	84494397	84494398	HoneydewSepia0187-MS-2	123	-	Zfp407	Zfp407
chr2	18069331	18069332	HoneydewSepia0236-MS-3	123	-	Mllt10
chr2	135055520	135055521	HoneydewSepia0236-MS-3	123	+	Plcb1	Plcb1
chr4	57607052	57607053	HoneydewSepia0187-MS-2	123	+	Pakap|Palm2	Pakap|Palm2
chr5	119210873	119210874	HoneydewSepia0236-MS-3	123	+	Med13l	Med13l
chr6	138382053	138382054	HoneydewSepia0187-MS-2	123	-	Lmo3	Lmo3
chr8	38478026	38478027	HoneydewSepia0236-MS-3	123	-
chrX	71196076	71196077	HoneydewSepia0187-MS-2	123	-	Hcfc1	Hcfc1
chr1	118083711	118083712	HoneydewSepia0187-MS-2	122	+	Cntnap5a	Cntnap5a
chr1	124335887	124335888	HoneydewSepia0236-MS-2	122	-
chr1	152028743	152028744	HoneydewSepia0187-MS-2	122	-
chr10	40005234	40005235	HoneydewSepia0236-MS-3	122	+
chr10	53181724	53181725	HoneydewSepia0187-MS-2	122	+
chr10	100467610	100467611	HoneydewSepia0187-MS-2	122	-
chr16	30990837	30990838	HoneydewSepia0187-MS-2	122	-	Mir1195|Xxylt1	Mir1195|Xxylt1
chr19	55642018	55642019	HoneyDewSepia0236-MS-1	122	+	Vti1a	Vti1a
chr4	34806947	34806948	HoneydewSepia0236-MS-2	122	+	Zfp292
chr4	62838552	62838553	HoneydewSepia0187-MS-2	122	-
chr6	122426460	122426461	HoneydewSepia0236-MS-3	122	+	Rimklb
chr1	3592299	3592300	HoneydewSepia0187-MS-2	121	+	Xkr4
chr1	127831477	127831478	HoneydewSepia0236-MS-2	121	-	Nckap5	Nckap5
chr1	140504172	140504173	HoneydewSepia0236-MS-2	121	-	Nek7	Nek7
chr10	82632495	82632496	HoneydewSepia0187-MS-2	121	+	Chst11	Chst11
chr12	109759271	109759272	HoneydewSepia0187-MS-2	121	-	Eml1
chr13	99531926	99531927	HoneydewSepia0236-MS-2	121	-	Fcho2	Fcho2
chr19	32843029	32843030	HoneydewSepia0187-MS-2	121	-	Pten
chr5	151140752	151140753	HoneydewSepia0236-MS-3	121	+	Fry	Fry
chr7	61535226	61535227	HoneydewSepia0236-MS-3	121	+
chr8	73096834	73096835	HoneydewSepia0236-MS-2	121	-	Ell
chr1	158796476	158796477	HoneydewSepia0236-MS-2	120	-	Ralgps2	Ralgps2
chr1	163427769	163427770	HoneydewSepia0187-MS-2	120	+	Tnfsf18	Tnfsf18
chr11	28475727	28475728	HoneydewSepia0187-MS-2	120	+	Ccdc85a
chr11	87536692	87536693	HoneydewSepia0236-MS-2	120	-	Rnf43
chr12	14115187	14115188	HoneydewSepia0236-MS-3	120	-
chr13	119074350	119074351	HoneydewSepia0187-MS-2	120	-
chr3	86738641	86738642	HoneydewSepia0236-MS-2	120	+
chr4	33893537	33893538	HoneydewSepia0187-MS-2	120	+
chr4	40393418	40393419	HoneydewSepia0236-MS-3	120	+
chr5	151581382	151581383	HoneydewSepia0187-MS-2	120	-	Pds5b
chr1	123850460	123850461	HoneydewSepia0236-MS-3	119	-
chr1	157893812	157893813	HoneydewSepia0187-MS-2	119	-	Tor1aip2
chr12	79930972	79930973	HoneydewSepia0236-MS-3	119	+	Mpp5	Mpp5
chr15	97918218	97918219	HoneydewSepia0236-MS-3	119	+	Senp1
chr19	53406321	53406322	HoneydewSepia0236-MS-3	119	-	Mxi1
chr9	81892970	81892971	HoneydewSepia0187-MS-2	119	-	Mei4
chrX	99633596	99633597	HoneydewSepia0187-MS-2	119	+	Hdac8
chrX	137025192	137025193	HoneydewSepia0236-MS-3	119	-
chr1	49081061	49081062	HoneydewSepia0236-MS-3	118	+
chr1	146735334	146735335	HoneydewSepia0187-MS-2	118	-
chr1	151806361	151806362	HoneydewSepia0236-MS-2	118	+	Pla2g4a
chr10	5188759	5188760	HoneydewSepia0236-MS-3	118	-	Syne1
chr10	30232656	30232657	HoneydewSepia0187-MS-2	118	+
chr12	61494088	61494089	HoneydewSepia0187-MS-2	118	+
chr17	27797939	27797940	HoneydewSepia0236-MS-3	118	+	Pacsin1	Pacsin1
chr3	60627764	60627765	HoneydewSepia0187-MS-2	118	+
chr4	148666541	148666542	HoneyDewSepia0187-MS-3	118	-	Kif1b	Kif1b
chr5	92247213	92247214	HoneydewSepia0187-MS-2	118	-
chr5	110619140	110619141	HoneydewSepia0236-MS-3	118	+	Golga3	Golga3
chr9	44029527	44029528	HoneydewSepia0236-MS-3	118	+	Cbl
chr1	48514278	48514279	HoneydewSepia0187-MS-2	117	-
chr1	187692337	187692338	HoneydewSepia0236-MS-2	117	+
chr10	70142935	70142936	HoneydewSepia0236-MS-3	117	+
chr10	115770497	115770498	HoneydewSepia0236-MS-3	117	+	Ptprb	Ptprb
chr17	5233128	5233129	HoneydewSepia0187-MS-2	117	-	Arid1b
chr18	69022216	69022217	HoneydewSepia0236-MS-3	117	+
chr1	45508873	45508874	HoneydewSepia0187-MS-2	116	+	Col5a2
chr1	163918110	163918111	HoneydewSepia0236-MS-2	116	+	Dnm3
chr19	26753402	26753403	HoneydewSepia0236-MS-3	116	+	Smarca2	Smarca2
chr19	32626622	32626623	HoneydewSepia0187-MS-2	116	+
chr2	28613324	28613325	HoneydewSepia0187-MS-2	116	+	Ak8	Ak8
chr4	23262096	23262097	HoneydewSepia0236-MS-3	116	+
chr6	7529656	7529657	HoneydewSepia0236-MS-2	116	-
chr6	66505009	66505010	HoneydewSepia0187-MS-2	116	+	Vmn1r32
chr7	97330063	97330064	HoneydewSepia0187-MS-2	116	+	Picalm	Picalm
chr7	116096080	116096081	HoneydewSepia0236-MS-3	116	+
chr1	41399040	41399041	HoneydewSepia0187-MS-2	115	-
chr10	110607613	110607614	HoneydewSepia0236-MS-3	115	+	Osbpl8	Osbpl8
chr11	92851877	92851878	HoneydewSepia0236-MS-3	115	+
chr12	17156912	17156913	HoneydewSepia0236-MS-3	115	+
chr18	11401993	11401994	HoneydewSepia0236-MS-3	115	+
chr2	131119459	131119460	HoneydewSepia0236-MS-3	115	+	Pank2	Pank2
chr6	124920125	124920126	HoneydewSepia0187-MS-2	115	-
chr7	100744614	100744615	HoneydewSepia0236-MS-3	115	-
chr9	44296126	44296127	HoneydewSepia0236-MS-3	115	-
chr1	84797671	84797672	HoneyDewSepia0187-MS-3	114	+	Trip12
chr1	181730148	181730149	HoneyDewSepia0236-MS-1	114	-	Ahctf1	Ahctf1
chr14	55296821	55296822	HoneydewSepia0236-MS-3	114	-	Acin1	Acin1
chr16	8728898	8728899	HoneydewSepia0236-MS-3	114	-	Usp7	Usp7
chr2	169936056	169936057	HoneydewSepia0187-MS-2	114	+	Zfp217
chr3	148018578	148018579	HoneydewSepia0236-MS-3	114	+
chr5	20498592	20498593	HoneydewSepia0187-MS-2	114	+	Ptpn12
chr5	34224898	34224899	HoneydewSepia0187-MS-2	114	+	Whsc1	Whsc1
chr6	50533652	50533653	HoneydewSepia0236-MS-2	114	+	4921507P07Rik|5430402O13Rik	5430402O13Rik
chr6	106749500	106749501	HoneydewSepia0236-MS-3	114	-	Crbn	Crbn
chr1	6697506	6697507	HoneydewSepia0187-MS-2	113	+	St18	St18
chr11	63982810	63982811	HoneydewSepia0187-MS-2	113	-
chr12	53625695	53625696	HoneydewSepia0187-MS-2	113	+	Arhgap5	Arhgap5
chr13	8124124	8124125	HoneydewSepia0236-MS-2	113	+
chr14	14884623	14884624	HoneydewSepia0236-MS-3	113	+	Atxn7	Atxn7
chr16	10628943	10628944	HoneydewSepia0187-MS-2	113	+	Clec16a	Clec16a
chr4	75696080	75696081	HoneydewSepia0187-MS-2	113	+	Ptprd
chr7	64260975	64260976	HoneydewSepia0187-MS-2	113	-	Gabrg3	Gabrg3
chr1	80282506	80282507	HoneydewSepia0236-MS-3	112	-	Cul3	Cul3
chr1	105850471	105850472	HoneydewSepia0236-MS-3	112	-
chr1	126275221	126275222	HoneydewSepia0187-MS-2	112	-
chr1	144236296	144236297	HoneydewSepia0236-MS-2	112	+
chr1	180165909	180165910	HoneyDewSepia0236-MS-1	112	+	Desi2	Desi2
chr1	181127506	181127507	HoneydewSepia0236-MS-3	112	+	Smyd3
chr12	9004499	9004500	HoneyDewSepia0236-MS-1	112	+	Wdr35	Wdr35
chr14	31146684	31146685	HoneydewSepia0236-MS-3	112	-	Cacna1d	Cacna1d
chr16	83670327	83670328	HoneydewSepia0236-MS-3	112	+
chr18	60759505	60759506	HoneydewSepia0236-MS-3	112	-	Synpo	Synpo
chr7	11072659	11072660	HoneydewSepia0236-MS-2	112	-	Zik1	Zik1
chr1	124180893	124180894	HoneydewSepia0236-MS-2	111	-
chr1	155162491	155162492	HoneydewSepia0187-MS-2	111	-	Lamc1	Lamc1
chr11	88318453	88318454	HoneydewSepia0187-MS-2	111	+	Msi2
chr17	77128809	77128810	HoneydewSepia0236-MS-3	111	+
chr18	41518968	41518969	HoneydewSepia0236-MS-3	111	+
chr2	83163676	83163677	HoneydewSepia0236-MS-2	111	+
chr5	70828776	70828777	HoneydewSepia0187-MS-2	111	+
chr6	99569086	99569087	HoneydewSepia0236-MS-3	111	-
chr8	119624576	119624577	HoneydewSepia0187-MS-2	111	-	Bco1
chr1	10190787	10190788	HoneyDewSepia0187-MS-3	110	-	Arfgef1	Arfgef1
chr1	102036195	102036196	HoneydewSepia0236-MS-3	110	+	Cntnap5b	Cntnap5b
chr1	144833233	144833234	HoneydewSepia0187-MS-2	110	-
chr10	43094874	43094875	HoneydewSepia0187-MS-2	110	-	Pdss2
chr12	86021394	86021395	HoneydewSepia0236-MS-2	110	+	Syndig1l
chr18	85311267	85311268	HoneydewSepia0236-MS-3	110	+
chr2	121242669	121242670	HoneydewSepia0236-MS-3	110	-	Pdia3
chr4	53392972	53392973	HoneydewSepia0187-MS-2	110	+
chr4	117370141	117370142	HoneydewSepia0187-MS-2	110	-
chr5	73359417	73359418	HoneydewSepia0236-MS-2	110	-	Slain2
chr6	100810952	100810953	HoneydewSepia0236-MS-2	110	-	Ppp4r2
chr7	124008799	124008800	HoneydewSepia0187-MS-2	110	-
chrX	117945174	117945175	HoneydewSepia0236-MS-3	110	-	Pcdh11x
chr1	38397856	38397857	HoneydewSepia0236-MS-2	109	+	Aff3
chr10	21253585	21253586	HoneydewSepia0236-MS-2	109	+
chr11	23626148	23626149	HoneydewSepia0187-MS-2	109	+	Pus10	Pus10
chr12	86229008	86229009	HoneydewSepia0236-MS-3	109	-
chr4	36262442	36262443	HoneydewSepia0236-MS-3	109	-	Lingo2	Lingo2
chr4	109742181	109742182	HoneydewSepia0236-MS-2	109	-
chr7	18837709	18837710	HoneydewSepia0187-MS-2	109	+	Mill1	Mill1
chr8	34956212	34956213	HoneydewSepia0236-MS-2	109	-	Rbpms	Rbpms
chr8	68166450	68166451	HoneydewSepia0236-MS-3	109	+	2018-03-01	2018-03-01
chr8	73172057	73172058	HoneydewSepia0187-MS-2	109	-	Pgpep1	Pgpep1
chr9	118736502	118736503	HoneydewSepia0236-MS-3	109	-	Itga9
chr1	36912455	36912456	HoneydewSepia0236-MS-2	108	-	Tmem131	Tmem131
chr1	52544049	52544050	HoneydewSepia0187-MS-2	108	+	Nab1
chr1	103581227	103581228	HoneydewSepia0187-MS-2	108	+
chr1	118784510	118784511	HoneydewSepia0236-MS-3	108	-
chr1	151066918	151066919	HoneydewSepia0236-MS-2	108	+
chr11	106756245	106756246	HoneydewSepia0187-MS-2	108	-	Smurf2	Smurf2
chr12	85645905	85645906	HoneydewSepia0187-MS-2	108	+	Ptgr2	Ptgr2
chr13	91372202	91372203	HoneydewSepia0187-MS-2	108	-
chr14	97424729	97424730	HoneydewSepia0187-MS-2	108	-
chr15	5771588	5771589	HoneydewSepia0187-MS-2	108	+
chr15	86041373	86041374	HoneydewSepia0187-MS-2	108	-
chr16	74746592	74746593	HoneydewSepia0187-MS-2	108	-
chr3	36628703	36628704	HoneydewSepia0236-MS-2	108	+
chr3	75261599	75261600	HoneydewSepia0236-MS-2	108	-
chr5	117671183	117671184	HoneydewSepia0236-MS-3	108	-	Taok3
chr5	133567099	133567100	HoneydewSepia0236-MS-3	108	+
chr7	68150679	68150680	HoneydewSepia0236-MS-3	108	-
chr9	114601958	114601959	HoneydewSepia0187-MS-2	108	+	Dync1li1	Dync1li1
chrX	137494367	137494368	HoneydewSepia0236-MS-3	108	-	Atg4a
chr1	181903552	181903553	HoneydewSepia0187-MS-2	107	+	Cdc42bpa	Cdc42bpa
chr13	53247631	53247632	HoneydewSepia0187-MS-2	107	-	Ror2	Ror2
chr14	68550373	68550374	HoneydewSepia0236-MS-3	107	-	Dock5	Dock5
chr15	36164622	36164623	HoneydewSepia0236-MS-2	107	-	Spag1
chr18	12627438	12627439	HoneydewSepia0236-MS-3	107	+	Lama3	Lama3
chr2	162044234	162044235	HoneydewSepia0236-MS-3	107	+	Ptprt
chr6	101025315	101025316	HoneydewSepia0236-MS-2	107	+
chr9	15001060	15001061	HoneydewSepia0236-MS-2	107	-
chr9	21187034	21187035	HoneydewSepia0236-MS-2	107	-	Ilf3
chr1	6836325	6836326	HoneydewSepia0236-MS-3	106	-	St18
chr1	64481056	64481057	HoneydewSepia0187-MS-2	106	+
chr1	95690493	95690494	HoneydewSepia0236-MS-3	106	-	Dtymk	Dtymk
chr1	187103998	187103999	HoneydewSepia0236-MS-2	106	+	Rab3gap2	Rab3gap2
chr10	60599158	60599159	HoneydewSepia0187-MS-2	106	-	Sgpl1	Sgpl1
chr10	115621104	115621105	HoneydewSepia0236-MS-3	106	-	Ptprr
chr12	78547866	78547867	HoneydewSepia0187-MS-2	106	+	Fut8	Fut8
chr12	99777690	99777691	HoneydewSepia0236-MS-2	106	-	Kcnk10	Kcnk10
chr13	18834831	18834832	HoneydewSepia0187-MS-2	106	-	Vps41
chr13	55387234	55387235	HoneydewSepia0187-MS-2	106	-	Nsd1
chr15	85514288	85514289	HoneydewSepia0187-MS-2	106	+
chr18	43848924	43848925	HoneydewSepia0236-MS-3	106	-
chr19	18917140	18917141	HoneydewSepia0236-MS-3	106	+	Trpm6	Trpm6
chr4	77338892	77338893	HoneydewSepia0187-MS-2	106	-	Ptprd	Ptprd
chr9	123047967	123047968	HoneydewSepia0187-MS-2	106	-
chrX	74888897	74888898	HoneydewSepia0187-MS-2	106	-	Tbl1x
chrX	147351395	147351396	HoneydewSepia0236-MS-2	106	-
chr1	80323437	80323438	HoneydewSepia0187-MS-2	105	+	Cul3
chr1	89577613	89577614	HoneydewSepia0236-MS-2	105	-	Inpp5d
chr1	136461480	136461481	HoneydewSepia0187-MS-2	105	-	Kdm5b
chr1	149887254	149887255	HoneydewSepia0187-MS-2	105	-
chr11	86534623	86534624	HoneydewSepia0236-MS-3	105	-	Cltc	Cltc
chr14	31273081	31273082	HoneydewSepia0236-MS-2	105	-	4831407H17Rik|Cacna1d	Cacna1d
chr16	45902665	45902666	HoneydewSepia0187-MS-2	105	-
chr3	151910309	151910310	HoneydewSepia0236-MS-2	105	+	Nexn
chr4	62735015	62735016	HoneydewSepia0236-MS-3	105	-	Zfp618
chr4	68828372	68828373	HoneydewSepia0187-MS-2	105	-
chr4	136063346	136063347	HoneydewSepia0187-MS-2	105	-	Luzp1
chr4	136898020	136898021	HoneydewSepia0187-MS-2	105	+	Cdc42
chr5	9360548	9360549	HoneydewSepia0187-MS-2	105	-	9330182L06Rik
chr5	115068858	115068859	HoneydewSepia0236-MS-3	105	-
chr7	18505921	18505922	HoneydewSepia0187-MS-2	105	-
chr8	11813316	11813317	HoneydewSepia0187-MS-2	105	+	Arhgef7	Arhgef7
chr9	82812580	82812581	HoneydewSepia0187-MS-2	105	+	Phip
chr1	49156920	49156921	HoneydewSepia0236-MS-3	104	+
chr1	89797535	89797536	HoneydewSepia0236-MS-2	104	+	Dgkd	Dgkd
chr10	6491371	6491372	HoneydewSepia0187-MS-2	104	+	Plekhg1
chr10	80175401	80175402	HoneydewSepia0236-MS-2	104	+	Ap3d1
chr12	83055262	83055263	HoneydewSepia0236-MS-3	104	+	Pcnx	Pcnx
chr13	104663160	104663161	HoneydewSepia0187-MS-2	104	+	Erbb2ip
chr14	89038038	89038039	HoneydewSepia0187-MS-2	104	-
chr16	24413534	24413535	HoneydewSepia0187-MS-2	104	+	Lpp	Lpp
chr17	83386583	83386584	HoneydewSepia0236-MS-2	104	+
chr18	10072846	10072847	HoneyDewSepia0187-MS-3	104	+	Rock1
chr19	42227247	42227248	HoneydewSepia0187-MS-2	104	+
chr4	39195420	39195421	HoneydewSepia0236-MS-2	104	-
chr5	28808648	28808649	HoneydewSepia0236-MS-3	104	-	9530036O11Rik
chr5	100789616	100789617	HoneydewSepia0187-MS-2	104	-
chr5	110597411	110597412	HoneydewSepia0236-MS-3	104	-	Chfr|Gm15787	Gm15787
chr6	104046378	104046379	HoneydewSepia0236-MS-3	104	+
chr8	104069049	104069050	HoneydewSepia0187-MS-2	104	-
chr8	131239797	131239798	HoneydewSepia0236-MS-3	104	-	Itgb1
chr9	36820972	36820973	HoneydewSepia0187-MS-2	104	+	Pknox2
chr9	102219478	102219479	HoneydewSepia0236-MS-2	104	-	Ephb1	Ephb1
chr1	21022152	21022153	HoneydewSepia0236-MS-2	103	+	Tram2
chr1	82750256	82750257	HoneydewSepia0187-MS-2	103	-
chr1	87575031	87575032	HoneydewSepia0187-MS-2	103	+	Sp100	Sp100
chr1	132192890	132192891	HoneydewSepia0187-MS-2	103	-
chr1	158902267	158902268	HoneydewSepia0187-MS-2	103	+
chr1	176599649	176599650	HoneydewSepia0236-MS-2	103	-	Fmn2
chr10	41620267	41620268	HoneydewSepia0236-MS-2	103	-	Sesn1
chr11	31471996	31471997	HoneydewSepia0187-MS-2	103	-
chr13	110869600	110869601	HoneydewSepia0236-MS-3	103	-	Rab3c	Rab3c
chr17	15090312	15090313	HoneydewSepia0236-MS-3	103	+	Phf10
chr3	20362149	20362150	HoneydewSepia0236-MS-3	103	+
chr4	40210699	40210700	HoneydewSepia0236-MS-3	103	-	Topors	Topors
chr4	58158505	58158506	HoneydewSepia0187-MS-2	103	-	Svep1	Svep1
chr5	87248659	87248660	HoneydewSepia0236-MS-2	103	+	Ythdc1	Ythdc1
chr6	60681306	60681307	HoneydewSepia0187-MS-2	103	+
chr6	93988987	93988988	HoneydewSepia0236-MS-2	103	-	Magi1	Magi1
chr7	126336322	126336323	HoneydewSepia0187-MS-2	103	+
chr7	137306798	137306799	HoneydewSepia0236-MS-2	103	-	Fgfr2	Fgfr2
chr7	151799260	151799261	HoneydewSepia0187-MS-2	103	-	Ano1	Ano1
chr8	70550917	70550918	HoneydewSepia0187-MS-2	103	+
chr9	8714940	8714941	HoneydewSepia0187-MS-2	103	-	Gm32014	Gm32014
chrX	12605024	12605025	HoneydewSepia0187-MS-2	103	-
chrX	161080645	161080646	HoneydewSepia0236-MS-3	103	+
chr1	147045131	147045132	HoneydewSepia0236-MS-3	102	+
chr1	165667678	165667679	HoneydewSepia0236-MS-2	102	-
chr1	167443299	167443300	HoneydewSepia0236-MS-3	102	+	Adcy10	Adcy10
chr1	179502112	179502113	HoneydewSepia0236-MS-3	102	+
chr12	3707537	3707538	HoneydewSepia0187-MS-2	102	-	Dtnb
chr12	106219981	106219982	HoneydewSepia0236-MS-2	102	+	Syne3
chr15	101909757	101909758	HoneydewSepia0236-MS-2	102	-	Eif4b
chr16	58177070	58177071	HoneydewSepia0236-MS-3	102	-
chr17	87096360	87096361	HoneydewSepia0236-MS-3	102	+
chr18	10743186	10743187	HoneydewSepia0236-MS-3	102	+	Mib1	Mib1
chr2	178599843	178599844	HoneydewSepia0236-MS-3	102	+
chr5	6198133	6198134	HoneydewSepia0187-MS-2	102	+
chr8	35647925	35647926	HoneydewSepia0236-MS-3	102	+
chr8	102731167	102731168	HoneydewSepia0187-MS-2	102	-
chr1	61482548	61482549	HoneydewSepia0236-MS-2	101	-
chr1	110152622	110152623	HoneydewSepia0187-MS-2	101	-
chr1	111045275	111045276	HoneydewSepia0187-MS-2	101	+
chr1	128972470	128972471	HoneydewSepia0187-MS-2	101	+
chr1	132039595	132039596	HoneydewSepia0236-MS-3	101	+	Thsd7b	Thsd7b
chr1	145673679	145673680	HoneydewSepia0236-MS-2	101	+
chr1	147787417	147787418	HoneydewSepia0236-MS-3	101	-
chr1	193465025	193465026	HoneydewSepia0236-MS-3	101	-
chr10	43745840	43745841	HoneydewSepia0236-MS-2	101	-
chr10	90530952	90530953	HoneydewSepia0236-MS-3	101	-	Apaf1	Apaf1
chr10	123856403	123856404	HoneydewSepia0187-MS-2	101	+
chr12	82619156	82619157	HoneydewSepia0187-MS-2	101	-	Synj2bp	Synj2bp
chr14	117051718	117051719	HoneydewSepia0236-MS-3	101	-
chr15	86124227	86124228	HoneydewSepia0236-MS-3	101	+	Tbc1d22a	Tbc1d22a
chr18	64151233	64151234	HoneydewSepia0236-MS-3	101	-
chr2	104954358	104954359	HoneydewSepia0236-MS-3	101	+	Wt1os
chr4	59497492	59497493	HoneydewSepia0236-MS-2	101	+	Ptbp3
chr4	135537280	135537281	HoneydewSepia0236-MS-3	101	-	Pithd1	Pithd1
chr5	58161218	58161219	HoneydewSepia0236-MS-3	101	+	Pcdh7	Pcdh7
chr8	53129727	53129728	HoneydewSepia0236-MS-3	101	+
chr8	100855584	100855585	HoneydewSepia0187-MS-2	101	+
chr9	10902004	10902005	HoneydewSepia0236-MS-2	101	+	Cntn5
chr9	54800341	54800342	HoneydewSepia0187-MS-2	101	-	Psma4
chr9	65876879	65876880	HoneydewSepia0236-MS-3	101	-	Csnk1g1
chrX	19892865	19892866	HoneydewSepia0236-MS-3	101	-
chr1	97484879	97484880	HoneydewSepia0187-MS-2	100	+	St8sia4
chr1	158537178	158537179	HoneydewSepia0236-MS-3	100	+	Abl2	Abl2
chr15	63795893	63795894	HoneydewSepia0236-MS-3	100	-	Fam49b	Fam49b
chr15	66442761	66442762	HoneydewSepia0236-MS-3	100	+	Phf20l1	Phf20l1
chr15	85213145	85213146	HoneydewSepia0187-MS-2	100	-	Atxn10
chr16	87487820	87487821	HoneydewSepia0236-MS-3	100	+	Cct8
chr16	90950469	90950470	HoneydewSepia0236-MS-3	100	+	Synj1
chr17	52807664	52807665	HoneydewSepia0236-MS-3	100	+	Kcnh8	Kcnh8
chr18	67685361	67685362	HoneydewSepia0236-MS-2	100	-	Spire1	Spire1
chr18	86103259	86103260	HoneydewSepia0187-MS-2	100	+
chr19	14553352	14553353	HoneydewSepia0236-MS-3	100	+	Tle4
chr4	81187385	81187386	HoneydewSepia0187-MS-2	100	+
chr4	129202420	129202421	HoneydewSepia0187-MS-2	100	-	Hdac1	Hdac1
chr6	64909725	64909726	HoneydewSepia0187-MS-2	100	-
chr7	151522838	151522839	HoneydewSepia0187-MS-2	100	+	Shank2	Shank2
chr8	31598646	31598647	HoneydewSepia0236-MS-2	100	+
chr9	74993583	74993584	HoneydewSepia0187-MS-2	100	-	Myo5a
chrX	119023916	119023917	HoneydewSepia0236-MS-2	100	-
chr1	62889763	62889764	HoneydewSepia0187-MS-2	99	-
chr1	80309006	80309007	HoneydewSepia0236-MS-3	99	-	Cul3	Cul3
chr1	133078891	133078892	HoneydewSepia0187-MS-2	99	-	Rassf5	Rassf5
chr1	149634506	149634507	HoneydewSepia0236-MS-3	99	-
chr1	152671056	152671057	HoneydewSepia0187-MS-2	99	-	Hmcn1	Hmcn1
chr1	184373407	184373408	HoneydewSepia0236-MS-3	99	+	Trp53bp2	Trp53bp2
chr1	189605532	189605533	HoneydewSepia0187-MS-2	99	-	Esrrg
chr14	21907536	21907537	HoneydewSepia0236-MS-3	99	+	Adk	Adk
chr16	55620045	55620046	HoneydewSepia0236-MS-3	99	+
chr17	57341373	57341374	HoneydewSepia0187-MS-2	99	-
chr18	12315578	12315579	HoneydewSepia0236-MS-3	99	+	Riok3	Riok3
chr18	43155036	43155037	HoneydewSepia0236-MS-2	99	-	Ppp2r2b	Ppp2r2b
chr18	77678711	77678712	HoneydewSepia0187-MS-2	99	+	Loxhd1	Loxhd1
chr2	10340532	10340533	HoneydewSepia0187-MS-2	99	+	Sfmbt2	Sfmbt2
chr3	123684895	123684896	HoneydewSepia0187-MS-2	99	-
chr3	126955237	126955238	HoneydewSepia0187-MS-2	99	+
chr4	98122536	98122537	HoneydewSepia0187-MS-2	99	-	Inadl
chr5	24340217	24340218	HoneydewSepia0236-MS-3	99	-	Rheb	Rheb
chr5	92634146	92634147	HoneydewSepia0236-MS-3	99	-
chr5	139369671	139369672	HoneydewSepia0236-MS-3	99	-
chr6	109436423	109436424	HoneydewSepia0187-MS-2	99	+
chr7	72512061	72512062	HoneydewSepia0187-MS-2	99	-	Tjp1	Tjp1
chr8	24051541	24051542	HoneydewSepia0187-MS-2	99	+	Kat6a	Kat6a
chrX	116573586	116573587	HoneydewSepia0187-MS-2	99	-
chr1	7769097	7769098	HoneydewSepia0236-MS-3	98	-
chr1	70433970	70433971	HoneydewSepia0236-MS-3	98	-	Spag16
chr1	81352043	81352044	HoneydewSepia0236-MS-3	98	-
chr1	103054955	103054956	HoneydewSepia0187-MS-2	98	-	Gm20268
chr1	123325131	123325132	HoneydewSepia0236-MS-2	98	-
chr1	138243559	138243560	HoneydewSepia0236-MS-3	98	-
chr1	147908125	147908126	HoneydewSepia0236-MS-3	98	-
chr1	172132852	172132853	HoneydewSepia0187-MS-2	98	-	Uhmk1	Uhmk1
chr10	121695123	121695124	HoneydewSepia0187-MS-2	98	+
chr11	21468963	21468964	HoneydewSepia0236-MS-3	98	+	Mdh1
chr12	118873562	118873563	HoneydewSepia0187-MS-2	98	+	Rapgef5	Rapgef5
chr17	33019568	33019569	HoneydewSepia0236-MS-3	98	+	Zfp870
chr17	86676171	86676172	HoneydewSepia0236-MS-3	98	+	Prkce	Prkce
chr2	52904788	52904789	HoneydewSepia0236-MS-2	98	-	Fmnl2
chr4	133271345	133271346	HoneydewSepia0187-MS-2	98	-	Arid1a	Arid1a
chr5	42178521	42178522	HoneydewSepia0236-MS-3	98	+
chr5	69679501	69679502	HoneydewSepia0187-MS-2	98	-	Kctd8	Kctd8
chr5	119027900	119027901	HoneydewSepia0187-MS-2	98	-	Med13l
chrX	95686947	95686948	HoneydewSepia0236-MS-2	98	-
chr1	55341147	55341148	HoneydewSepia0236-MS-2	97	-
chr1	144235050	144235051	HoneydewSepia0236-MS-2	97	+
chr1	149561262	149561263	HoneydewSepia0187-MS-2	97	-
chr1	189740234	189740235	HoneydewSepia0236-MS-3	97	-	Esrrg
chr1	192452160	192452161	HoneydewSepia0187-MS-2	97	-
chr10	57883798	57883799	HoneydewSepia0236-MS-2	97	+	Lims1	Lims1
chr10	74727554	74727555	HoneydewSepia0187-MS-2	97	-	Specc1l
chr12	109378971	109378972	HoneydewSepia0236-MS-3	97	-	Setd3	Setd3
chr13	32429565	32429566	HoneydewSepia0187-MS-2	97	-	Gmds	Gmds
chr15	12122372	12122373	HoneydewSepia0236-MS-3	97	-
chr15	84192126	84192127	HoneydewSepia0236-MS-3	97	+
chr16	60165161	60165162	HoneydewSepia0187-MS-2	97	+	Epha6
chr17	68120668	68120669	HoneydewSepia0187-MS-2	97	-	Lama1
chr17	80186390	80186391	HoneydewSepia0236-MS-3	97	+
chr18	69606523	69606524	HoneydewSepia0236-MS-3	97	+	Tcf4	Tcf4
chr2	154632558	154632559	HoneydewSepia0187-MS-2	97	-	Raly
chr4	138817682	138817683	HoneydewSepia0187-MS-2	97	-	Capzb
chr6	90074706	90074707	HoneydewSepia0187-MS-2	97	-	Vmn1r51
chr7	119106220	119106221	HoneydewSepia0236-MS-3	97	-
chr9	65836175	65836176	HoneydewSepia0236-MS-2	97	+	Csnk1g1	Csnk1g1
chr1	48563410	48563411	HoneydewSepia0187-MS-2	96	+
chr1	97668918	97668919	HoneydewSepia0236-MS-3	96	-
chr1	107212194	107212195	HoneydewSepia0236-MS-2	96	+	Rnf152
chr1	130117259	130117260	HoneydewSepia0187-MS-2	96	-	R3hdm1
chr1	145705997	145705998	HoneydewSepia0187-MS-2	96	-
chr1	150642830	150642831	HoneydewSepia0187-MS-2	96	-
chr1	150759811	150759812	HoneydewSepia0236-MS-3	96	-
chr1	170949397	170949398	HoneydewSepia0187-MS-2	96	-
chr11	49907549	49907550	HoneydewSepia0187-MS-2	96	-	Rnf130
chr11	121376785	121376786	HoneydewSepia0187-MS-2	96	+	Tbcd|Zfp750	Tbcd
chr14	37859264	37859265	HoneydewSepia0236-MS-3	96	-	Rgr	Rgr
chr14	73993620	73993621	HoneydewSepia0236-MS-3	96	-	Sucla2
chr18	27840635	27840636	HoneydewSepia0236-MS-3	96	-
chr19	49141070	49141071	HoneydewSepia0187-MS-2	96	-
chr2	46704068	46704069	HoneydewSepia0236-MS-3	96	+
chr2	76249301	76249302	HoneydewSepia0187-MS-2	96	-	Osbpl6
chr3	18895696	18895697	HoneydewSepia0236-MS-3	96	-
chr4	14575025	14575026	HoneydewSepia0187-MS-2	96	-
chr6	22753517	22753518	HoneydewSepia0236-MS-2	96	-
chr6	72056949	72056950	HoneydewSepia0236-MS-2	96	-	St3gal5
chr7	127069434	127069435	HoneydewSepia0236-MS-3	96	+
chr7	134816704	134816705	HoneydewSepia0187-MS-2	96	-
chr8	55027298	55027299	HoneydewSepia0187-MS-2	96	-
chr8	85567417	85567418	HoneydewSepia0187-MS-2	96	+	Rnf150	Rnf150
chr8	125470509	125470510	HoneydewSepia0187-MS-2	96	-	Ankrd11	Ankrd11
chr9	25208180	25208181	HoneydewSepia0187-MS-2	96	-
chr1	20060522	20060523	HoneydewSepia0187-MS-2	95	-	Pkhd1	Pkhd1
chr1	129817383	129817384	HoneydewSepia0236-MS-3	95	-	Rab3gap1
chr11	31783968	31783969	HoneydewSepia0236-MS-3	95	-	Cpeb4
chr11	33816304	33816305	HoneydewSepia0236-MS-3	95	-	Kcnip1	Kcnip1
chr14	21735775	21735776	HoneydewSepia0236-MS-3	95	-
chr14	73069921	73069922	HoneydewSepia0236-MS-2	95	-	Fndc3a	Fndc3a
chr14	116667851	116667852	HoneydewSepia0236-MS-3	95	-	Gpc5
chr16	3749124	3749125	HoneydewSepia0236-MS-2	95	-	Zfp263
chr16	78544445	78544446	HoneydewSepia0236-MS-3	95	+	D16Ertd472e
chr17	84588629	84588630	HoneydewSepia0187-MS-2	95	-
chr19	32453217	32453218	HoneydewSepia0236-MS-3	95	+	Sgms1
chr3	73523744	73523745	HoneydewSepia0187-MS-2	95	+
chr4	91429075	91429076	HoneydewSepia0187-MS-2	95	+
chr5	10686014	10686015	HoneydewSepia0187-MS-2	95	+
chr6	65550092	65550093	HoneydewSepia0187-MS-2	95	-	Tnip3
chr6	129381426	129381427	HoneydewSepia0236-MS-3	95	+	Clec1a
chr7	125882329	125882330	HoneydewSepia0236-MS-2	95	+
chr9	105308595	105308596	HoneydewSepia0236-MS-3	95	+
chrX	12174832	12174833	HoneydewSepia0236-MS-3	95	-	Atp6ap2
chr1	33601068	33601069	HoneydewSepia0187-MS-2	94	+	Prim2
chr1	34875000	34875001	HoneydewSepia0236-MS-2	94	+	Fam168b
chr1	47912253	47912254	HoneydewSepia0236-MS-3	94	+
chr1	151733015	151733016	HoneydewSepia0236-MS-3	94	+	Pla2g4a
chr1	165173898	165173899	HoneydewSepia0236-MS-3	94	-
chr1	170327559	170327560	HoneydewSepia0187-MS-2	94	+	Pbx1
chr10	73973663	73973664	HoneydewSepia0236-MS-2	94	+	Pcdh15	Pcdh15
chr11	96270413	96270414	HoneydewSepia0187-MS-2	94	-
chr12	38581663	38581664	HoneydewSepia0236-MS-3	94	-
chr12	43848316	43848317	HoneydewSepia0187-MS-2	94	-
chr12	73076038	73076039	HoneydewSepia0236-MS-3	94	+	Daam1	Daam1
chr12	86347190	86347191	HoneydewSepia0187-MS-2	94	+	Ylpm1	Ylpm1
chr14	62237936	62237937	HoneydewSepia0236-MS-3	94	+	Dleu2
chr14	77545393	77545394	HoneyDewSepia0236-MS-1	94	+
chr14	121441719	121441720	HoneydewSepia0187-MS-2	94	-	Farp1
chr15	101024705	101024706	HoneydewSepia0187-MS-2	94	-	Acvr1b
chr15	102263057	102263058	HoneydewSepia0236-MS-3	94	-	Sp1
chr16	20690160	20690161	HoneydewSepia0236-MS-3	94	-	Eif4g1
chr18	22041197	22041198	HoneydewSepia0187-MS-2	94	-	Ccdc178	Ccdc178
chr19	3507646	3507647	HoneydewSepia0236-MS-2	94	+	Ppp6r3
chr2	10646435	10646436	HoneydewSepia0187-MS-2	94	+
chr2	45821140	45821141	HoneydewSepia0236-MS-3	94	-
chr3	52820673	52820674	HoneydewSepia0236-MS-3	94	-	Cog6	Cog6
chr3	79405549	79405550	HoneydewSepia0187-MS-2	94	-	Ppid
chr3	84361981	84361982	HoneydewSepia0187-MS-2	94	-	Arfip1	Arfip1
chr3	84677800	84677801	HoneydewSepia0187-MS-2	94	-	Fbxw7
chr3	124432951	124432952	HoneydewSepia0187-MS-2	94	+
chr3	133283188	133283189	HoneydewSepia0236-MS-3	94	+
chr3	141905370	141905371	HoneydewSepia0236-MS-3	94	+	Pdlim5
chr4	19514804	19514805	HoneydewSepia0236-MS-2	94	+	Rmdn1	Rmdn1
chr4	62340329	62340330	HoneydewSepia0236-MS-3	94	-	Rgs3
chr5	39823729	39823730	HoneydewSepia0236-MS-3	94	+
chr5	41645475	41645476	HoneydewSepia0236-MS-2	94	+
chr5	57898265	57898266	HoneydewSepia0236-MS-3	94	-
chr8	86264619	86264620	HoneydewSepia0187-MS-2	94	+	Adgre5
chr8	108354582	108354583	HoneydewSepia0236-MS-3	94	+	Tsnaxip1	Tsnaxip1
chr9	52986566	52986567	HoneydewSepia0187-MS-2	94	+	Ddx10
chrX	156125713	156125714	HoneydewSepia0236-MS-3	94	-	Sh3kbp1
chr1	23608958	23608959	HoneydewSepia0187-MS-2	93	+
chr1	152473082	152473083	HoneydewSepia0187-MS-2	93	+	Hmcn1
chr1	189112022	189112023	HoneydewSepia0236-MS-2	93	+	Gpatch2	Gpatch2
chr10	21717286	21717287	HoneydewSepia0187-MS-2	93	-	Sgk1
chr11	42406725	42406726	HoneydewSepia0187-MS-2	93	-	Gabrb2
chr11	98737198	98737199	HoneydewSepia0187-MS-2	93	+	Wipf2	Wipf2
chr12	106054688	106054689	HoneydewSepia0236-MS-3	93	+	Clmn
chr13	59905390	59905391	HoneydewSepia0236-MS-2	93	+	Zcchc6
chr14	22007149	22007150	HoneydewSepia0187-MS-2	93	+	Adk	Adk
chr15	99681972	99681973	HoneydewSepia0187-MS-2	93	-	Lima1	Lima1
chr18	62671001	62671002	HoneydewSepia0236-MS-3	93	+	Fbxo38
chr2	51978662	51978663	HoneydewSepia0187-MS-2	93	-
chr3	90134108	90134109	HoneydewSepia0236-MS-3	93	-
chr4	40790293	40790294	HoneydewSepia0236-MS-3	93	+	B4galt1
chr7	116470796	116470797	HoneydewSepia0187-MS-2	93	+	Stk33
chrX	163474567	163474568	HoneydewSepia0187-MS-2	93	+
chr1	40619800	40619801	HoneydewSepia0236-MS-3	92	-
chr1	95319864	95319865	HoneydewSepia0187-MS-2	92	-	Hdlbp	Hdlbp
chr1	96384846	96384847	HoneydewSepia0236-MS-2	92	-
chr1	167766752	167766753	HoneydewSepia0187-MS-2	92	-	Cd247
chr1	184093339	184093340	HoneydewSepia0236-MS-3	92	-
chr1	191635458	191635459	HoneydewSepia0236-MS-3	92	-	Ptpn14
chr1	196598814	196598815	HoneydewSepia0187-MS-2	92	-	Plxna2
chr10	20040122	20040123	HoneydewSepia0187-MS-2	92	-	Bclaf1
chr10	35593650	35593651	HoneydewSepia0236-MS-3	92	+
chr11	54339041	54339042	HoneydewSepia0236-MS-3	92	-	Rapgef6
chr11	81091034	81091035	HoneydewSepia0236-MS-2	92	+	Asic2
chr12	76926952	76926953	HoneydewSepia0236-MS-2	92	+	Syne2	Syne2
chr12	111681316	111681317	HoneydewSepia0187-MS-2	92	-
chr13	6635175	6635176	HoneydewSepia0187-MS-2	92	-	Pfkp	Pfkp
chr13	35848143	35848144	HoneydewSepia0236-MS-2	92	+	Cdyl	Cdyl
chr14	89442305	89442306	HoneydewSepia0187-MS-2	92	-
chr15	21652476	21652477	HoneydewSepia0236-MS-3	92	+
chr17	85470473	85470474	HoneydewSepia0187-MS-2	92	-	Prepl	Prepl
chr18	77332756	77332757	HoneydewSepia0236-MS-3	92	-	Pias2
chr19	60390597	60390598	HoneydewSepia0236-MS-2	92	-
chr2	99481662	99481663	HoneydewSepia0187-MS-2	92	+
chr2	154620649	154620650	HoneydewSepia0236-MS-3	92	+	Raly	Raly
chr2	157263336	157263337	HoneydewSepia0236-MS-2	92	-	Src
chr2	162413645	162413646	HoneydewSepia0236-MS-2	92	+	Ptprt
chr4	149806373	149806374	HoneydewSepia0187-MS-2	92	+	Rere	Rere
chr5	144062778	144062779	HoneydewSepia0236-MS-2	92	-	E130309D02Rik	E130309D02Rik
chr6	34224028	34224029	HoneydewSepia0236-MS-3	92	-
chr7	140137946	140137947	HoneydewSepia0187-MS-2	92	-
chr8	88040318	88040319	HoneydewSepia0236-MS-3	92	+	Gpt2	Gpt2
chr9	33663467	33663468	HoneydewSepia0236-MS-2	92	-
chrX	18040379	18040380	HoneydewSepia0236-MS-3	92	+
chrX	47388664	47388665	HoneydewSepia0236-MS-3	92	-
chrX	75964877	75964878	HoneydewSepia0236-MS-2	92	+
chrX	158233631	158233632	HoneydewSepia0187-MS-2	92	+
chr1	120741405	120741406	HoneydewSepia0236-MS-3	91	+	Gli2
chr1	123383028	123383029	HoneydewSepia0187-MS-2	91	+	Ccdc93	Ccdc93
chr1	160989748	160989749	HoneydewSepia0236-MS-3	91	-
chr12	26965235	26965236	HoneydewSepia0187-MS-2	91	+
chr12	56057958	56057959	HoneydewSepia0236-MS-3	91	+	Baz1a
chr13	114301700	114301701	HoneydewSepia0187-MS-2	91	+
chr13	118129741	118129742	HoneydewSepia0236-MS-3	91	+
chr15	92796339	92796340	HoneydewSepia0187-MS-2	91	+
chr17	85187810	85187811	HoneydewSepia0236-MS-3	91	-	Lrpprc	Lrpprc
chr17	94267832	94267833	HoneydewSepia0236-MS-3	91	+
chr19	18833919	18833920	HoneydewSepia0236-MS-2	91	-	Trpm6
chr2	8131326	8131327	HoneydewSepia0236-MS-2	91	-
chr2	27300720	27300721	HoneydewSepia0187-MS-2	91	+
chr2	27530399	27530400	HoneydewSepia0236-MS-2	91	-
chr2	57014843	57014844	HoneydewSepia0236-MS-3	91	-	BB557941	BB557941
chr2	136203843	136203844	HoneydewSepia0236-MS-3	91	+	Pak7
chr3	43226825	43226826	HoneydewSepia0236-MS-3	91	-
chr4	16085267	16085268	HoneydewSepia0236-MS-2	91	+	Ripk2
chr6	83880918	83880919	HoneydewSepia0236-MS-3	91	+	Zfml	Zfml
chr7	35297340	35297341	HoneydewSepia0187-MS-2	91	-
chr7	119988908	119988909	HoneydewSepia0187-MS-2	91	+	Tead1	Tead1
chr7	151442822	151442823	HoneydewSepia0187-MS-2	91	+	Shank2	Shank2
chr9	110494416	110494417	HoneydewSepia0187-MS-2	91	+	Setd2	Setd2
chrX	15949071	15949072	HoneydewSepia0236-MS-2	91	+
chrX	157941412	157941413	HoneydewSepia0236-MS-3	91	-
chr1	50683172	50683173	HoneydewSepia0236-MS-2	90	+
chr1	58149235	58149236	HoneydewSepia0236-MS-2	90	-	Aox1
chr1	125374610	125374611	HoneydewSepia0187-MS-2	90	-	Dpp10	Dpp10
chr1	127740985	127740986	HoneydewSepia0187-MS-2	90	-	Gpr39
chr1	143063605	143063606	HoneydewSepia0236-MS-3	90	+
chr1	179221363	179221364	HoneydewSepia0187-MS-2	90	+
chr11	70385729	70385730	HoneydewSepia0236-MS-2	90	-	Mink1
chr12	11479735	11479736	HoneydewSepia0187-MS-2	90	-
chr12	39908804	39908805	HoneydewSepia0187-MS-2	90	+
chr14	74677368	74677369	HoneydewSepia0236-MS-3	90	+
chr14	119364039	119364040	HoneydewSepia0236-MS-3	90	+	Dnajc3	Dnajc3
chr16	48625118	48625119	HoneydewSepia0236-MS-3	90	+	Morc1	Morc1
chr18	55137378	55137379	HoneydewSepia0236-MS-2	90	-	Zfp608	Zfp608
chr19	7291548	7291549	HoneydewSepia0187-MS-2	90	+	Cox8a
chr2	120054250	120054251	HoneydewSepia0236-MS-3	90	+	Pla2g4e
chr3	58169385	58169386	HoneydewSepia0236-MS-3	90	+
chr3	122288844	122288845	HoneydewSepia0236-MS-3	90	+	Fnbp1l
chr3	131132232	131132233	HoneydewSepia0187-MS-2	90	-
chr4	28852714	28852715	HoneydewSepia0187-MS-2	90	+	Epha7	Epha7
chr4	129522914	129522915	HoneydewSepia0236-MS-2	90	-	Ptp4a2
chr4	152178702	152178703	HoneydewSepia0236-MS-2	90	-
chr5	29945188	29945189	HoneydewSepia0236-MS-3	90	-	Ube3c
chr5	31475564	31475565	HoneydewSepia0187-MS-2	90	+	Gtf3c2
chr7	134676939	134676940	HoneydewSepia0187-MS-2	90	-	Srcap
chr8	11074226	11074227	HoneydewSepia0187-MS-2	90	+
chrX	99044212	99044213	HoneydewSepia0187-MS-2	90	+
chrX	163973546	163973547	HoneydewSepia0236-MS-3	90	+	Frmpd4
chr1	80932313	80932314	HoneydewSepia0187-MS-2	89	+
chr1	123885383	123885384	HoneydewSepia0187-MS-2	89	-
chr1	138217236	138217237	HoneydewSepia0187-MS-2	89	+	Camsap2
chr1	147325489	147325490	HoneydewSepia0236-MS-3	89	-
chr1	157051553	157051554	HoneydewSepia0236-MS-2	89	-
chr1	161793355	161793356	HoneydewSepia0187-MS-2	89	+	Tnr	Tnr
chr10	26516907	26516908	HoneydewSepia0187-MS-2	89	+	Arhgap18	Arhgap18
chr10	32457709	32457710	HoneydewSepia0236-MS-3	89	+	Nkain2
chr11	97043728	97043729	HoneydewSepia0187-MS-2	89	-	Kpnb1	Kpnb1
chr12	72796387	72796388	HoneydewSepia0187-MS-2	89	-
chr12	73864139	73864140	HoneydewSepia0236-MS-2	89	+	Ppm1a	Ppm1a
chr12	74987411	74987412	HoneydewSepia0236-MS-2	89	-
chr13	44892471	44892472	HoneydewSepia0236-MS-2	89	-	Jarid2
chr14	61426218	61426219	HoneydewSepia0236-MS-3	89	+	Mipep	Mipep
chr15	14850249	14850250	HoneydewSepia0236-MS-2	89	+
chr15	73620528	73620529	HoneydewSepia0187-MS-2	89	+	Mroh5
chr15	84560919	84560920	HoneydewSepia0236-MS-3	89	-	Arhgap8
chr16	43384336	43384337	HoneydewSepia0236-MS-2	89	-	Zbtb20
chr16	76949184	76949185	HoneydewSepia0187-MS-2	89	+
chr17	6969565	6969566	HoneydewSepia0236-MS-3	89	+	Ezr
chr17	7720412	7720413	HoneydewSepia0236-MS-2	89	+
chr17	15632413	15632414	HoneydewSepia0236-MS-3	89	+	Psmb1
chr18	27729428	27729429	HoneydewSepia0236-MS-2	89	-
chr18	35952763	35952764	HoneydewSepia0187-MS-2	89	+	Ube2d2a	Ube2d2a
chr2	37942267	37942268	HoneydewSepia0236-MS-3	89	+	Dennd1a
chr2	135647448	135647449	HoneydewSepia0236-MS-3	89	-	Plcb4
chr3	124641700	124641701	HoneydewSepia0236-MS-2	89	+
chr4	72235132	72235133	HoneydewSepia0187-MS-2	89	+
chr4	79457621	79457622	HoneydewSepia0236-MS-2	89	+
chr4	92403596	92403597	HoneydewSepia0236-MS-3	89	-
chr6	26380106	26380107	HoneydewSepia0236-MS-3	89	+
chr6	30081211	30081212	HoneydewSepia0236-MS-2	89	+	Nrf1	Nrf1
chr8	35974075	35974076	HoneydewSepia0236-MS-2	89	+	Tnks
chr9	40398741	40398742	HoneydewSepia0187-MS-2	89	-
chr9	60194786	60194787	HoneydewSepia0187-MS-2	89	+	Thsd4
chrX	136625916	136625917	HoneydewSepia0187-MS-2	89	-	E230019M04Rik
chr1	47605466	47605467	HoneydewSepia0187-MS-2	88	+
chr1	88218000	88218001	HoneydewSepia0236-MS-3	88	-
chr1	167437872	167437873	HoneydewSepia0236-MS-3	88	+	Adcy10	Adcy10
chr1	196612419	196612420	HoneydewSepia0236-MS-3	88	+	Plxna2	Plxna2
chr10	101136276	101136277	HoneydewSepia0236-MS-2	88	+
chr10	110833456	110833457	HoneydewSepia0236-MS-3	88	-
chr13	47771426	47771427	HoneydewSepia0187-MS-2	88	-
chr13	118102821	118102822	HoneydewSepia0187-MS-2	88	+
chr15	9578114	9578115	HoneydewSepia0187-MS-2	88	+	Spef2
chr15	72095744	72095745	HoneydewSepia0236-MS-3	88	+
chr17	35694707	35694708	HoneydewSepia0187-MS-2	88	-
chr2	161763797	161763798	HoneydewSepia0236-MS-3	88	+	Ptprt
chr3	13269742	13269743	HoneydewSepia0236-MS-3	88	-
chr3	30929866	30929867	HoneydewSepia0236-MS-3	88	-	Prkci
chr3	40121413	40121414	HoneydewSepia0187-MS-2	88	-
chr3	57624617	57624618	HoneydewSepia0187-MS-2	88	+	Rnf13	Rnf13
chr4	73970503	73970504	HoneydewSepia0187-MS-2	88	+	Kdm4c	Kdm4c
chr4	75440803	75440804	HoneydewSepia0187-MS-2	88	-
chr4	105435057	105435058	HoneydewSepia0187-MS-2	88	+
chr5	106136651	106136652	HoneydewSepia0236-MS-3	88	-	Lrrc8d
chr5	137938142	137938143	HoneydewSepia0187-MS-2	88	-
chr6	126636409	126636410	HoneydewSepia0187-MS-2	88	+
chr8	93937742	93937743	HoneydewSepia0187-MS-2	88	-	Fto
chr9	112493101	112493102	HoneydewSepia0187-MS-2	88	-
chrX	93525746	93525747	HoneydewSepia0236-MS-3	88	+	Hsf3
chr1	24395823	24395824	HoneydewSepia0236-MS-2	87	-	Col19a1	Col19a1
chr1	75821795	75821796	HoneydewSepia0236-MS-3	87	-
chr1	89266054	89266055	HoneydewSepia0187-MS-2	87	-	Gigyf2
chr1	91883087	91883088	HoneydewSepia0236-MS-3	87	-	Asb18	Asb18
chr1	103106494	103106495	HoneydewSepia0236-MS-3	87	-
chr1	110740512	110740513	HoneydewSepia0187-MS-2	87	-
chr1	138201212	138201213	HoneydewSepia0236-MS-3	87	-	Camsap2	Camsap2
chr1	142162358	142162359	HoneydewSepia0187-MS-2	87	-	Kcnt2
chr1	148262246	148262247	HoneydewSepia0236-MS-2	87	+
chr1	155823272	155823273	HoneydewSepia0236-MS-2	87	-
chr1	165347264	165347265	HoneydewSepia0236-MS-3	87	+
chr1	176649535	176649536	HoneydewSepia0187-MS-2	87	-	Fmn2
chr10	44026443	44026444	HoneydewSepia0236-MS-3	87	+	Atg5	Atg5
chr10	120850762	120850763	HoneydewSepia0187-MS-2	87	+	Rassf3
chr12	3258134	3258135	HoneydewSepia0187-MS-2	87	-	Rab10	Rab10
chr12	72122984	72122985	HoneydewSepia0187-MS-2	87	+	Arid4a	Arid4a
chr13	9589393	9589394	HoneydewSepia0236-MS-3	87	-	Dip2c
chr13	76815439	76815440	HoneydewSepia0236-MS-2	87	-	Mctp1
chr13	110638755	110638756	HoneydewSepia0236-MS-3	87	+	Pde4d	Pde4d
chr14	9334625	9334626	HoneydewSepia0187-MS-2	87	+	4930452B06Rik
chr14	104897373	104897374	HoneydewSepia0187-MS-2	87	-	Rnf219	Rnf219
chr14	117563526	117563527	HoneydewSepia0236-MS-2	87	-	Gpc6
chr16	16281068	16281069	HoneydewSepia0236-MS-3	87	+
chr16	26714844	26714845	HoneydewSepia0187-MS-2	87	-	Gm20319|Il1rap	Gm20319
chr17	81206970	81206971	HoneydewSepia0236-MS-2	87	+
chr18	76172178	76172179	HoneydewSepia0236-MS-3	87	+	Zbtb7c	Zbtb7c
chr19	32882159	32882160	HoneydewSepia0187-MS-2	87	+	Pten	Pten
chr19	42668462	42668463	HoneydewSepia0187-MS-2	87	+	Loxl4
chr4	117303767	117303768	HoneydewSepia0187-MS-2	87	+	Eri3	Eri3
chr5	110859539	110859540	HoneydewSepia0187-MS-2	87	+	Fbrsl1|Gm29766
chr5	128096967	128096968	HoneydewSepia0187-MS-2	87	-	Slc15a4	Slc15a4
chr6	38852586	38852587	HoneydewSepia0236-MS-3	87	-
chr6	139598776	139598777	HoneydewSepia0236-MS-2	87	-	Pik3c2g
chr7	97592935	97592936	HoneydewSepia0187-MS-2	87	+	Crebzf	Crebzf
chr8	60328786	60328787	HoneydewSepia0187-MS-2	87	-	Galntl6	Galntl6
chr9	14162853	14162854	HoneydewSepia0236-MS-2	87	-	Endod1	Endod1
chr9	120329461	120329462	HoneydewSepia0236-MS-2	87	-	Myrip
chrX	62224207	62224208	HoneydewSepia0236-MS-2	87	+
chrX	131152077	131152078	HoneydewSepia0187-MS-2	87	-
chrX	135499579	135499580	HoneydewSepia0187-MS-2	87	-	Nrk
chr1	24513492	24513493	HoneydewSepia0236-MS-3	86	+	Col19a1
chr1	27773167	27773168	HoneydewSepia0236-MS-3	86	+
chr1	66174593	66174594	HoneydewSepia0236-MS-3	86	-
chr1	93290728	93290729	HoneydewSepia0187-MS-2	86	+	Ilkap
chr1	113454736	113454737	HoneydewSepia0187-MS-2	86	+
chr10	19033952	19033953	HoneydewSepia0236-MS-2	86	+
chr10	57548184	57548185	HoneydewSepia0187-MS-2	86	+
chr10	115281724	115281725	HoneydewSepia0236-MS-3	86	-	Tspan8
chr11	67663961	67663962	HoneydewSepia0236-MS-3	86	-
chr11	119569214	119569215	HoneydewSepia0187-MS-2	86	-	Rptor
chr11	120847319	120847320	HoneydewSepia0236-MS-2	86	+	Csnk1d
chr12	76036659	76036660	HoneydewSepia0236-MS-2	86	-	Kcnh5	Kcnh5
chr12	102885216	102885217	HoneydewSepia0236-MS-3	86	-	Tc2n	Tc2n
chr14	80526661	80526662	HoneydewSepia0187-MS-2	86	+
chr14	103795948	103795949	HoneydewSepia0187-MS-2	86	-
chr14	121221917	121221918	HoneydewSepia0187-MS-2	86	-
chr14	121742833	121742834	HoneydewSepia0236-MS-3	86	+	Stk24
chr16	13653916	13653917	HoneydewSepia0187-MS-2	86	-	Parn	Parn
chr17	66375065	66375066	HoneydewSepia0187-MS-2	86	-	Ankrd12	Ankrd12
chr18	22791884	22791885	HoneydewSepia0236-MS-2	86	+
chr19	7286311	7286312	HoneydewSepia0187-MS-2	86	+
chr19	28572690	28572691	HoneydewSepia0187-MS-2	86	+	Glis3
chr19	47322137	47322138	HoneydewSepia0236-MS-3	86	+	Neurl1a	Neurl1a
chr2	52989559	52989560	HoneydewSepia0236-MS-3	86	-	Fmnl2
chr2	97420783	97420784	HoneydewSepia0187-MS-2	86	+	Lrrc4c	Lrrc4c
chr2	117472261	117472262	HoneydewSepia0236-MS-3	86	+
chr3	116275310	116275311	HoneydewSepia0236-MS-3	86	+	Lrrc39	Lrrc39
chr4	129408957	129408958	HoneydewSepia0187-MS-2	86	-	Khdrbs1	Khdrbs1
chr5	41368888	41368889	HoneydewSepia0187-MS-2	86	+
chr5	68593386	68593387	HoneydewSepia0236-MS-3	86	-
chr6	16189949	16189950	HoneydewSepia0236-MS-2	86	-
chr7	29377488	29377489	HoneydewSepia0236-MS-2	86	-	Pak4	Pak4
chr8	34800517	34800518	HoneydewSepia0187-MS-2	86	-	Gsr
chr9	96174904	96174905	HoneydewSepia0236-MS-3	86	+	Tfdp2	Tfdp2
chrX	101843843	101843844	HoneydewSepia0187-MS-2	86	-	Zdhhc15	Zdhhc15
chr1	29091887	29091888	HoneydewSepia0187-MS-2	85	-
chr1	44935259	44935260	HoneydewSepia0187-MS-2	85	-
chr1	76302538	76302539	HoneydewSepia0236-MS-3	85	-
chr1	82315136	82315137	HoneydewSepia0236-MS-3	85	-	Rhbdd1
chr1	88754479	88754480	HoneydewSepia0187-MS-2	85	+	Dis3l2	Dis3l2
chr1	110060487	110060488	HoneydewSepia0236-MS-3	85	+
chr1	127281378	127281379	HoneydewSepia0187-MS-2	85	-
chr1	140016040	140016041	HoneydewSepia0236-MS-2	85	+	Ptprc
chr1	142243762	142243763	HoneydewSepia0236-MS-3	85	-	Kcnt2
chr1	148776250	148776251	HoneydewSepia0236-MS-3	85	-
chr1	172549828	172549829	HoneydewSepia0187-MS-2	85	+
chr1	181898157	181898158	HoneydewSepia0236-MS-3	85	+	Cdc42bpa	Cdc42bpa
chr12	43174413	43174414	HoneydewSepia0187-MS-2	85	+
chr12	97194240	97194241	HoneydewSepia0187-MS-2	85	-
chr13	46327600	46327601	HoneydewSepia0236-MS-2	85	-
chr14	41572166	41572167	HoneydewSepia0236-MS-3	85	+
chr15	69952006	69952007	HoneydewSepia0236-MS-3	85	-
chr16	56618061	56618062	HoneydewSepia0236-MS-2	85	+	Abi3bp	Abi3bp
chr17	85426773	85426774	HoneydewSepia0187-MS-2	85	-
chr17	87331111	87331112	HoneydewSepia0236-MS-3	85	-
chr18	45942067	45942068	HoneydewSepia0236-MS-3	85	+	A330093E20Rik
chr2	69472829	69472830	HoneydewSepia0187-MS-2	85	-
chr2	114243978	114243979	HoneydewSepia0187-MS-2	85	+
chr2	133387381	133387382	HoneydewSepia0187-MS-2	85	+	Bmp2	Bmp2
chr2	159043601	159043602	HoneydewSepia0187-MS-2	85	+
chr3	8664076	8664077	HoneydewSepia0187-MS-2	85	+	Hey1
chr3	76210839	76210840	HoneydewSepia0236-MS-2	85	-	Fstl5
chr3	95288014	95288015	HoneydewSepia0236-MS-3	85	-	Arnt
chr3	122685748	122685749	HoneydewSepia0187-MS-2	85	-	Usp53	Usp53
chr4	8465113	8465114	HoneydewSepia0236-MS-3	85	+	Rab2a	Rab2a
chr4	57249860	57249861	HoneydewSepia0236-MS-2	85	+	Ptpn3
chr5	59002503	59002504	HoneydewSepia0187-MS-2	85	-
chr5	138129338	138129339	HoneydewSepia0236-MS-3	85	+
chr8	39624965	39624966	HoneydewSepia0236-MS-3	85	+	Sgcz
chr8	95146382	95146383	HoneydewSepia0187-MS-2	85	+
chr9	83926014	83926015	HoneydewSepia0187-MS-2	85	-	Bckdhb
chrX	68714058	68714059	HoneydewSepia0187-MS-2	85	+	Cd99l2
chrX	71591126	71591127	HoneydewSepia0236-MS-3	85	-
chr1	22618429	22618430	HoneydewSepia0187-MS-2	84	-	Rims1	Rims1
chr1	49499239	49499240	HoneydewSepia0236-MS-3	84	+
chr1	92711575	92711576	HoneydewSepia0187-MS-2	84	+	Col6a3
chr1	114206337	114206338	HoneydewSepia0187-MS-2	84	-
chr1	130062933	130062934	HoneydewSepia0236-MS-3	84	+	R3hdm1	R3hdm1
chr1	194813691	194813692	HoneydewSepia0187-MS-2	84	-	Syt14	Syt14
chr10	39337721	39337722	HoneydewSepia0236-MS-3	84	-	Traf3ip2
chr10	122543009	122543010	HoneydewSepia0236-MS-3	84	-	Usp15	Usp15
chr14	90931376	90931377	HoneydewSepia0236-MS-3	84	-
chr14	105775324	105775325	HoneydewSepia0236-MS-2	84	+
chr15	66955531	66955532	HoneydewSepia0236-MS-3	84	-	St3gal1	St3gal1
chr17	35299144	35299145	HoneydewSepia0187-MS-2	84	-	Prrc2a	Prrc2a
chr18	33977465	33977466	HoneydewSepia0187-MS-2	84	+	Epb4.1l4a
chr18	55068340	55068341	HoneydewSepia0236-MS-2	84	-	Zfp608	Zfp608
chr19	49606056	49606057	HoneydewSepia0236-MS-2	84	-
chr2	57854981	57854982	HoneydewSepia0236-MS-3	84	-	Galnt5
chr2	67665308	67665309	HoneydewSepia0236-MS-3	84	+
chr2	119259057	119259058	HoneydewSepia0236-MS-2	84	+	Ino80
chr3	42481439	42481440	HoneydewSepia0236-MS-3	84	-
chr4	48974959	48974960	HoneydewSepia0187-MS-2	84	+
chr4	81171324	81171325	HoneydewSepia0187-MS-2	84	+
chr5	53675224	53675225	HoneydewSepia0187-MS-2	84	+
chr5	129032114	129032115	HoneydewSepia0187-MS-2	84	-
chr6	39937618	39937619	HoneydewSepia0187-MS-2	84	+
chr6	113231967	113231968	HoneydewSepia0236-MS-3	84	-
chr6	129154634	129154635	HoneydewSepia0187-MS-2	84	+
chr7	68598017	68598018	HoneydewSepia0187-MS-2	84	-
chr7	129811869	129811870	HoneydewSepia0236-MS-3	84	+
chr8	73284082	73284083	HoneydewSepia0236-MS-2	84	+	Mpv17l2
chr9	20154778	20154779	HoneydewSepia0187-MS-2	84	-	Zfp560	Zfp560
chr9	115959937	115959938	HoneydewSepia0187-MS-2	84	+	Gadl1	Gadl1
chrX	12165686	12165687	HoneydewSepia0236-MS-2	84	-	Atp6ap2
chrX	156078893	156078894	HoneydewSepia0236-MS-2	84	+	Sh3kbp1	Sh3kbp1
chrX	161755297	161755298	HoneydewSepia0236-MS-2	84	-	Glra2	Glra2
chr1	5275119	5275120	HoneydewSepia0236-MS-2	83	+
chr1	74627243	74627244	HoneydewSepia0187-MS-2	83	-	Zfp142	Zfp142
chr1	83114942	83114943	HoneydewSepia0236-MS-2	83	+	Ccl20	Ccl20
chr1	87709953	87709954	HoneydewSepia0236-MS-3	83	+	Cab39	Cab39
chr1	108268491	108268492	HoneydewSepia0236-MS-2	83	+	Phlpp1	Phlpp1
chr1	128114114	128114115	HoneydewSepia0236-MS-3	83	-	Nckap5	Nckap5
chr1	132670331	132670332	HoneydewSepia0236-MS-3	83	-
chr1	150887564	150887565	HoneydewSepia0236-MS-2	83	+
chr1	164845145	164845146	HoneydewSepia0236-MS-2	83	-
chr1	170274331	170274332	HoneydewSepia0236-MS-3	83	-	Pbx1	Pbx1
chr1	171912039	171912040	HoneydewSepia0187-MS-2	83	+	Ddr2
chr11	61816437	61816438	HoneydewSepia0236-MS-3	83	+	Specc1	Specc1
chr11	70669581	70669582	HoneydewSepia0236-MS-3	83	+	Rabep1	Rabep1
chr11	75664583	75664584	HoneydewSepia0236-MS-2	83	-	Rph3al	Rph3al
chr11	121646799	121646800	HoneydewSepia0187-MS-2	83	+
chr13	9731577	9731578	HoneydewSepia0236-MS-3	83	+	Zmynd11
chr14	32519319	32519320	HoneydewSepia0187-MS-2	83	+	Ankrd28
chr14	87089734	87089735	HoneydewSepia0187-MS-2	83	+	Diap3
chr14	93971226	93971227	HoneydewSepia0236-MS-3	83	-	Pcdh9	Pcdh9
chr15	25693205	25693206	HoneydewSepia0187-MS-2	83	+	Myo10	Myo10
chr16	61996423	61996424	HoneydewSepia0187-MS-2	83	-
chr18	62162083	62162084	HoneydewSepia0236-MS-3	83	-	Sh3tc2
chr19	4457155	4457156	HoneydewSepia0236-MS-3	83	-	Syt12	Syt12
chr2	22883869	22883870	HoneydewSepia0236-MS-2	83	-	Abi1	Abi1
chr2	59588312	59588313	HoneydewSepia0187-MS-2	83	-	Tanc1
chr2	60707753	60707754	HoneydewSepia0187-MS-2	83	-	Rbms1	Rbms1
chr2	90851073	90851074	HoneydewSepia0236-MS-3	83	-	Celf1
chr3	155405166	155405167	HoneydewSepia0187-MS-2	83	-
chr4	44717899	44717900	HoneydewSepia0236-MS-2	83	+	5730488B01Rik|Pax5	5730488B01Rik
chr4	50621209	50621210	HoneydewSepia0236-MS-2	83	-
chr4	90332051	90332052	HoneydewSepia0236-MS-3	83	+
chr6	82100151	82100152	HoneydewSepia0236-MS-3	83	-
chr7	82823929	82823930	HoneydewSepia0187-MS-2	83	-	Akap13
chr8	112400955	112400956	HoneydewSepia0236-MS-3	83	-	Phlpp2
chrX	14753301	14753302	HoneydewSepia0187-MS-2	83	-
chrX	43989593	43989594	HoneydewSepia0236-MS-3	83	-
chrX	141538782	141538783	HoneydewSepia0236-MS-3	83	+	Zcchc16	Zcchc16
chr1	44220296	44220297	HoneydewSepia0236-MS-3	82	+	Ercc5	Ercc5
chr1	82363251	82363252	HoneydewSepia0236-MS-3	82	-	Rhbdd1
chr1	82666909	82666910	HoneydewSepia0236-MS-3	82	-	Col4a3
chr1	104456321	104456322	HoneydewSepia0236-MS-3	82	+
chr10	73681582	73681583	HoneydewSepia0236-MS-3	82	-	Pcdh15
chr10	126732363	126732364	HoneydewSepia0236-MS-3	82	+	Ddit3	Ddit3
chr13	61377635	61377636	HoneydewSepia0236-MS-3	82	+
chr13	78724110	78724111	HoneydewSepia0236-MS-3	82	+
chr14	122049325	122049326	HoneydewSepia0236-MS-3	82	-	Dock9	Dock9
chr15	84100841	84100842	HoneydewSepia0187-MS-2	82	-	Parvb
chr16	4929115	4929116	HoneydewSepia0236-MS-3	82	-	Mgrn1
chr16	75553392	75553393	HoneydewSepia0187-MS-2	82	-	Lipi	Lipi
chr18	67482736	67482737	HoneydewSepia0187-MS-2	82	+	B430212C06Rik
chr19	3842366	3842367	HoneydewSepia0236-MS-3	82	-
chr2	22827094	22827095	HoneydewSepia0187-MS-2	82	-	Abi1	Abi1
chr2	93941987	93941988	HoneydewSepia0236-MS-2	82	+	Hsd17b12
chr2	130794952	130794953	HoneydewSepia0187-MS-2	82	+	Atrn	Atrn
chr3	20024312	20024313	HoneydewSepia0236-MS-3	82	-	Gyg	Gyg
chr3	52500506	52500507	HoneydewSepia0187-MS-2	82	+
chr3	103251011	103251012	HoneydewSepia0187-MS-2	82	+
chr3	105459368	105459369	HoneydewSepia0187-MS-2	82	+	Kcnd3	Kcnd3
chr4	100889473	100889474	HoneydewSepia0187-MS-2	82	-	Jak1	Jak1
chr4	155441803	155441804	HoneydewSepia0236-MS-3	82	-
chr5	12207456	12207457	HoneydewSepia0236-MS-3	82	-
chr5	100071984	100071985	HoneydewSepia0187-MS-2	82	+	A930011G23Rik
chr5	125609053	125609054	HoneydewSepia0236-MS-3	82	-	Ncor2	Ncor2
chr6	55304890	55304891	HoneydewSepia0187-MS-2	82	-
chr6	98952565	98952566	HoneydewSepia0236-MS-2	82	+	Foxp1
chr6	116496364	116496365	HoneydewSepia0187-MS-2	82	-
chr7	108279416	108279417	HoneydewSepia0187-MS-2	82	+	Fchsd2	Fchsd2
chr8	93939944	93939945	HoneydewSepia0236-MS-2	82	-	Fto
chr8	114326872	114326873	HoneydewSepia0236-MS-3	82	+	Cfdp1
chr9	114806335	114806336	HoneydewSepia0187-MS-2	82	+
chr9	116494725	116494726	HoneydewSepia0187-MS-2	82	-	Rbms3	Rbms3
chrX	9571528	9571529	HoneydewSepia0187-MS-2	82	-	Sytl5
chr1	10032548	10032549	HoneydewSepia0187-MS-2	81	+	Cspp1	Cspp1
chr1	28335224	28335225	HoneydewSepia0236-MS-2	81	-
chr1	39967600	39967601	HoneydewSepia0236-MS-3	81	-	Map4k4
chr1	80169239	80169240	HoneydewSepia0236-MS-3	81	+
chr1	107330102	107330103	HoneydewSepia0236-MS-2	81	+
chr1	131165125	131165126	HoneydewSepia0187-MS-2	81	-
chr1	156856834	156856835	HoneydewSepia0187-MS-2	81	-
chr1	157735359	157735360	HoneydewSepia0236-MS-3	81	+	Cep350
chr1	161978718	161978719	HoneydewSepia0236-MS-3	81	+	4930523C07Rik	4930523C07Rik
chr1	165667678	165667679	HoneyDewSepia0236-MS-1	81	-
chr1	165690121	165690122	HoneydewSepia0236-MS-2	81	+
chr1	186655082	186655083	HoneydewSepia0187-MS-2	81	-	2018-03-02	2018-03-02
chr1	190827519	190827520	HoneydewSepia0236-MS-2	81	-	Kctd3	Kctd3
chr11	61086892	61086893	HoneydewSepia0187-MS-2	81	+
chr11	72015019	72015020	HoneydewSepia0187-MS-2	81	+	4933427D14Rik
chr11	77531205	77531206	HoneydewSepia0236-MS-3	81	-	Nufip2
chr12	35818568	35818569	HoneydewSepia0236-MS-3	81	-	Snx13
chr12	102310143	102310144	HoneydewSepia0236-MS-3	81	-	Smek1	Smek1
chr13	49016239	49016240	HoneydewSepia0187-MS-2	81	-	Fam120a	Fam120a
chr16	15547859	15547860	HoneydewSepia0187-MS-2	81	+
chr16	17178705	17178706	HoneydewSepia0187-MS-2	81	-	Ube2l3	Ube2l3
chr16	44190111	44190112	HoneydewSepia0236-MS-3	81	+	Gm608	Gm608
chr16	59663923	59663924	HoneydewSepia0187-MS-2	81	-	4930547E14Rik|Epha6	Epha6
chr16	68407775	68407776	HoneydewSepia0236-MS-3	81	-
chr17	22130383	22130384	HoneydewSepia0187-MS-2	81	+	Zfp943	Zfp943
chr17	40116536	40116537	HoneydewSepia0236-MS-3	81	+
chr18	58049094	58049095	HoneydewSepia0236-MS-3	81	-	Slc12a2
chr18	90254966	90254967	HoneydewSepia0187-MS-2	81	+
chr19	22683166	22683167	HoneydewSepia0187-MS-2	81	-	Trpm3
chr19	48533256	48533257	HoneydewSepia0187-MS-2	81	+	Sorcs3	Sorcs3
chr2	43023612	43023613	HoneydewSepia0187-MS-2	81	+
chr2	70607276	70607277	HoneydewSepia0236-MS-2	81	-	Tlk1	Tlk1
chr2	72192043	72192044	HoneydewSepia0236-MS-2	81	+	Zak	Zak
chr2	94377342	94377343	HoneydewSepia0187-MS-2	81	+
chr3	159309229	159309230	HoneydewSepia0187-MS-2	81	+
chr4	8855408	8855409	HoneydewSepia0236-MS-3	81	+
chr4	63886729	63886730	HoneydewSepia0236-MS-3	81	+
chr4	100463461	100463462	HoneydewSepia0236-MS-3	81	+	Cachd1	Cachd1
chr6	72831949	72831950	HoneydewSepia0236-MS-2	81	-	Kcmf1	Kcmf1
chr7	60195940	60195941	HoneydewSepia0187-MS-2	81	-
chr7	74442230	74442231	HoneydewSepia0187-MS-2	81	+	Mef2a
chr7	127321103	127321104	HoneydewSepia0187-MS-2	81	-	Anks4b
chr8	58004036	58004037	HoneydewSepia0236-MS-2	81	-
chr8	73132417	73132418	HoneydewSepia0187-MS-2	81	-
chr9	3339648	3339649	HoneydewSepia0187-MS-2	81	-	Alkbh8
chr9	37023886	37023887	HoneydewSepia0236-MS-3	81	+	Tmem218	Tmem218
chrX	103116418	103116419	HoneydewSepia0236-MS-2	81	+	Atrx
chrX	137093998	137093999	HoneydewSepia0236-MS-3	81	+	Tsc22d3
chr1	32675232	32675233	HoneydewSepia0187-MS-2	80	-	Khdrbs2
chr1	52220879	52220880	HoneydewSepia0187-MS-2	80	-	Gls	Gls
chr1	56683978	56683979	HoneydewSepia0236-MS-3	80	-
chr1	137075198	137075199	HoneydewSepia0236-MS-2	80	+
chr1	146841243	146841244	HoneydewSepia0187-MS-2	80	-
chr1	161281963	161281964	HoneydewSepia0236-MS-3	80	-
chr1	163759943	163759944	HoneydewSepia0187-MS-2	80	+	Suco
chr1	195396061	195396062	HoneydewSepia0236-MS-3	80	+
chr10	18014697	18014698	HoneydewSepia0187-MS-2	80	+
chr10	55796754	55796755	HoneydewSepia0187-MS-2	80	+	Tbc1d32
chr10	59690295	59690296	HoneydewSepia0236-MS-3	80	-
chr10	126885776	126885777	HoneydewSepia0187-MS-2	80	-	R3hdm2
chr12	6569701	6569702	HoneydewSepia0187-MS-2	80	-
chr13	58677782	58677783	HoneydewSepia0236-MS-3	80	+	Slc28a3
chr14	108729364	108729365	HoneydewSepia0187-MS-2	80	-
chr17	28485967	28485968	HoneydewSepia0187-MS-2	80	-	Tead3	Tead3
chr17	35146769	35146770	HoneydewSepia0187-MS-2	80	+	Vars	Vars
chr18	20992039	20992040	HoneydewSepia0236-MS-3	80	-	Trappc8	Trappc8
chr19	23412555	23412556	HoneydewSepia0187-MS-2	80	+	Mamdc2
chr3	49955008	49955009	HoneydewSepia0187-MS-2	80	-
chr3	71635130	71635131	HoneydewSepia0236-MS-2	80	-
chr3	80847279	80847280	HoneydewSepia0187-MS-2	80	+	Pdgfc	Pdgfc
chr3	99377112	99377113	HoneydewSepia0236-MS-3	80	-
chr3	115438682	115438683	HoneydewSepia0236-MS-2	80	+
chr3	121971975	121971976	HoneydewSepia0236-MS-3	80	+
chr3	122209322	122209323	HoneydewSepia0236-MS-3	80	+	Bcar3	Bcar3
chr4	11207894	11207895	HoneydewSepia0187-MS-2	80	-	Dpy19l4	Dpy19l4
chr6	7406716	7406717	HoneydewSepia0187-MS-2	80	-
chr6	80502346	80502347	HoneydewSepia0187-MS-2	80	+	Lrrtm4	Lrrtm4
chr7	89521215	89521216	HoneydewSepia0236-MS-3	80	+	Adamtsl3	Adamtsl3
chr8	11000386	11000387	HoneydewSepia0236-MS-3	80	+	Irs2
chr9	17486193	17486194	HoneydewSepia0236-MS-2	80	-
chr9	29965348	29965349	HoneydewSepia0187-MS-2	80	-
chrX	13809335	13809336	HoneydewSepia0187-MS-2	80	+
chrX	59664712	59664713	HoneydewSepia0236-MS-3	80	+
chr1	25303802	25303803	HoneydewSepia0236-MS-3	79	-	Adgrb3	Adgrb3
chr1	30070674	30070675	HoneydewSepia0187-MS-2	79	-
chr1	107297059	107297060	HoneydewSepia0187-MS-2	79	-
chr1	126332450	126332451	HoneydewSepia0236-MS-3	79	+
chr1	157693630	157693631	HoneydewSepia0187-MS-2	79	+	Cep350
chr1	164654639	164654640	HoneydewSepia0236-MS-3	79	+	Prrc2c
chr1	167085573	167085574	HoneydewSepia0236-MS-3	79	+	Tbx19
chr1	180497507	180497508	HoneydewSepia0236-MS-3	79	-	Kif26b
chr10	113128749	113128750	HoneydewSepia0236-MS-2	79	+
chr12	3919680	3919681	HoneydewSepia0236-MS-2	79	-
chr12	8718145	8718146	HoneydewSepia0187-MS-2	79	-	Pum2
chr12	54173662	54173663	HoneydewSepia0236-MS-3	79	+	Akap6	Akap6
chr13	34285097	34285098	HoneydewSepia0187-MS-2	79	+	Slc22a23
chr13	60996729	60996730	HoneydewSepia0187-MS-2	79	+	Ctla2b
chr14	35156492	35156493	HoneydewSepia0236-MS-3	79	-	Glud1
chr14	65341352	65341353	HoneydewSepia0187-MS-2	79	-	Kif13b
chr14	69478900	69478901	HoneydewSepia0236-MS-3	79	+
chr14	113274219	113274220	HoneydewSepia0187-MS-2	79	-
chr15	87437060	87437061	HoneydewSepia0187-MS-2	79	-	Fam19a5
chr17	4432351	4432352	HoneydewSepia0236-MS-3	79	-
chr17	29535802	29535803	HoneydewSepia0187-MS-2	79	-
chr17	44815901	44815902	HoneydewSepia0236-MS-3	79	+	Runx2
chr18	6195410	6195411	HoneydewSepia0236-MS-3	79	-
chr18	27566936	27566937	HoneydewSepia0187-MS-2	79	+
chr18	39627633	39627634	HoneydewSepia0187-MS-2	79	+	Nr3c1
chr18	76433459	76433460	HoneydewSepia0236-MS-3	79	-	Smad2
chr19	45039416	45039417	HoneydewSepia0187-MS-2	79	+	Fam178a	Fam178a
chr2	19702637	19702638	HoneydewSepia0187-MS-2	79	-
chr2	57335144	57335145	HoneydewSepia0236-MS-3	79	+
chr2	59614706	59614707	HoneydewSepia0187-MS-2	79	-	Tanc1
chr2	62188630	62188631	HoneydewSepia0236-MS-3	79	-	Dpp4	Dpp4
chr2	68152101	68152102	HoneydewSepia0187-MS-2	79	-	Stk39	Stk39
chr4	138751221	138751222	HoneydewSepia0187-MS-2	79	+	Capzb	Capzb
chr5	79494239	79494240	HoneydewSepia0236-MS-3	79	+
chr5	120470985	120470986	HoneydewSepia0187-MS-2	79	+
chr5	131227660	131227661	HoneydewSepia0187-MS-2	79	+	Caln1	Caln1
chr7	35283658	35283659	HoneydewSepia0236-MS-3	79	+
chr8	6794037	6794038	HoneydewSepia0236-MS-3	79	+
chr8	16093121	16093122	HoneydewSepia0187-MS-2	79	+	Csmd1
chr8	75288679	75288680	HoneydewSepia0187-MS-2	79	-
chr8	97113946	97113947	HoneydewSepia0187-MS-2	79	-	Fam192a	Fam192a
chr9	37806835	37806836	HoneydewSepia0187-MS-2	79	-
chrX	5584001	5584002	HoneydewSepia0236-MS-3	79	+
chrX	92488698	92488699	HoneydewSepia0236-MS-2	79	-
chr1	16631110	16631111	HoneydewSepia0236-MS-3	78	-
chr1	22584991	22584992	HoneydewSepia0187-MS-2	78	+	Rims1
chr1	32063785	32063786	HoneydewSepia0187-MS-2	78	-
chr1	37391672	37391673	HoneydewSepia0236-MS-3	78	-	Inpp4a
chr1	39974411	39974412	HoneydewSepia0187-MS-2	78	+	Map4k4	Map4k4
chr1	79781581	79781582	HoneydewSepia0236-MS-2	78	+
chr1	91547864	91547865	HoneydewSepia0187-MS-2	78	-	Agap1
chr1	94356716	94356717	HoneydewSepia0236-MS-3	78	-	Ndufa10	Ndufa10
chr1	149664432	149664433	HoneydewSepia0236-MS-3	78	+
chr1	151566993	151566994	HoneydewSepia0236-MS-3	78	-
chr1	170236224	170236225	HoneydewSepia0187-MS-2	78	-	Pbx1	Pbx1
chr10	77521618	77521619	HoneydewSepia0187-MS-2	78	+	Dnmt3l	Dnmt3l
chr11	14081366	14081367	HoneydewSepia0236-MS-3	78	+
chr11	43512398	43512399	HoneydewSepia0236-MS-3	78	+	Pwwp2a	Pwwp2a
chr11	97563343	97563344	HoneydewSepia0236-MS-3	78	+
chr11	113605518	113605519	HoneydewSepia0236-MS-3	78	-	Cdc42ep4	Cdc42ep4
chr12	35749320	35749321	HoneydewSepia0187-MS-2	78	-	Snx13
chr13	3580480	3580481	HoneydewSepia0236-MS-2	78	-	Fam208b	Fam208b
chr13	35844782	35844783	HoneydewSepia0236-MS-3	78	+	Cdyl	Cdyl
chr14	12680191	12680192	HoneydewSepia0236-MS-2	78	-	Ptprg
chr14	63468275	63468276	HoneydewSepia0187-MS-2	78	-	Wdfy2
chr14	76908021	76908022	HoneydewSepia0187-MS-2	78	+
chr16	45192291	45192292	HoneydewSepia0236-MS-3	78	+
chr18	29674337	29674338	HoneydewSepia0187-MS-2	78	+
chr2	74689391	74689392	HoneydewSepia0187-MS-2	78	-	Mtx2
chr2	144303073	144303074	HoneydewSepia0187-MS-2	78	+	Dzank1
chr2	154967192	154967193	HoneydewSepia0236-MS-3	78	-	Itch
chr3	3889061	3889062	HoneydewSepia0187-MS-2	78	-
chr3	88494820	88494821	HoneydewSepia0236-MS-3	78	-	2810403A07Rik
chr3	104590838	104590839	HoneydewSepia0236-MS-2	78	+
chr3	137085331	137085332	HoneydewSepia0236-MS-3	78	+	Emcn	Emcn
chr4	25835440	25835441	HoneydewSepia0236-MS-2	78	+
chr4	125913611	125913612	HoneydewSepia0236-MS-3	78	+	Map7d1
chr5	48845173	48845174	HoneydewSepia0187-MS-2	78	+	Kcnip4
chr5	96545436	96545437	HoneydewSepia0236-MS-3	78	-	Cnot6l	Cnot6l
chr5	114328786	114328787	HoneydewSepia0187-MS-2	78	-	Coro1c	Coro1c
chr5	118559396	118559397	HoneydewSepia0187-MS-2	78	+	Fbxw8
chr5	147550669	147550670	HoneydewSepia0187-MS-2	78	+	Usp12
chr5	151453139	151453140	HoneydewSepia0187-MS-2	78	+	N4bp2l2
chr7	28383448	28383449	HoneydewSepia0236-MS-2	78	+	Akt2	Akt2
chrX	78265495	78265496	HoneydewSepia0236-MS-3	78	+
chrX	86095598	86095599	HoneydewSepia0236-MS-3	78	+
chr1	34884208	34884209	HoneydewSepia0236-MS-3	77	-	Fam168b	Fam168b
chr1	35983801	35983802	HoneydewSepia0187-MS-2	77	+
chr1	55784958	55784959	HoneydewSepia0236-MS-3	77	+	Plcl1	Plcl1
chr1	67265884	67265885	HoneydewSepia0187-MS-2	77	-	Cps1
chr1	81408474	81408475	HoneydewSepia0187-MS-2	77	+
chr1	122981153	122981154	HoneydewSepia0187-MS-2	77	-
chr1	145831066	145831067	HoneydewSepia0187-MS-2	77	+
chr1	150109602	150109603	HoneydewSepia0236-MS-3	77	+
chr1	165588003	165588004	HoneydewSepia0236-MS-3	77	+
chr1	167884067	167884068	HoneydewSepia0236-MS-3	77	+	Pou2f1
chr1	169194493	169194494	HoneydewSepia0236-MS-3	77	-	Uck2	Uck2
chr1	170270975	170270976	HoneydewSepia0236-MS-3	77	+	Pbx1
chr1	178117458	178117459	HoneydewSepia0236-MS-3	77	-	Pld5	Pld5
chr10	38863110	38863111	HoneydewSepia0187-MS-2	77	-	Tube1
chr10	126468184	126468185	HoneydewSepia0187-MS-2	77	-
chr11	54809608	54809609	HoneydewSepia0236-MS-2	77	+	Anxa6
chr11	62972827	62972828	HoneydewSepia0236-MS-2	77	-	Pmp22
chr11	102396821	102396822	HoneydewSepia0187-MS-2	77	+	Gpatch8
chr12	102237991	102237992	HoneydewSepia0187-MS-2	77	-	Ccdc88c	Ccdc88c
chr12	120459844	120459845	HoneydewSepia0187-MS-2	77	+	Itgb8
chr13	10930953	10930954	HoneydewSepia0187-MS-2	77	+
chr14	61801169	61801170	HoneydewSepia0187-MS-2	77	+	Sacs	Sacs
chr14	68496789	68496790	HoneydewSepia0187-MS-2	77	+	Dock5
chr15	12149233	12149234	HoneydewSepia0236-MS-3	77	+	Mtmr12	Mtmr12
chr15	90702264	90702265	HoneydewSepia0187-MS-2	77	-
chr16	4145357	4145358	HoneydewSepia0236-MS-3	77	+	Crebbp
chr16	51697768	51697769	HoneydewSepia0187-MS-2	77	+
chr16	62927258	62927259	HoneydewSepia0187-MS-2	77	+	Pros1	Pros1
chr18	76407764	76407765	HoneydewSepia0187-MS-2	77	-	Smad2
chr19	37181542	37181543	HoneydewSepia0236-MS-3	77	+	Cpeb3
chr19	40307564	40307565	HoneydewSepia0187-MS-2	77	-	Pdlim1	Pdlim1
chr19	51221629	51221630	HoneydewSepia0236-MS-2	77	+
chr2	45659865	45659866	HoneydewSepia0187-MS-2	77	-
chr2	94876655	94876656	HoneydewSepia0236-MS-3	77	-
chr3	22115214	22115215	HoneydewSepia0236-MS-2	77	+	Tbl1xr1	Tbl1xr1
chr3	118791244	118791245	HoneydewSepia0236-MS-2	77	-	Dpyd
chr3	129726997	129726998	HoneydewSepia0236-MS-3	77	+	Sec24b
chr5	50891816	50891817	HoneydewSepia0187-MS-2	77	+
chr5	121895913	121895914	HoneydewSepia0187-MS-2	77	-	Erp29	Erp29
chr6	38522631	38522632	HoneydewSepia0236-MS-2	77	+	Luc7l2	Luc7l2
chr6	146958656	146958657	HoneydewSepia0236-MS-3	77	-	Ppfibp1
chr7	3300347	3300348	HoneydewSepia0236-MS-3	77	+
chr7	84932536	84932537	HoneydewSepia0187-MS-2	77	-
chr8	24365338	24365339	HoneydewSepia0187-MS-2	77	-	Golga7	Golga7
chr8	26091623	26091624	HoneydewSepia0236-MS-2	77	-	Adam9	Adam9
chr8	27164011	27164012	HoneydewSepia0236-MS-3	77	-	Hook3	Hook3
chr8	51241750	51241751	HoneydewSepia0187-MS-2	77	+
chr9	3381407	3381408	HoneydewSepia0187-MS-2	77	+	Alkbh8	Alkbh8
chrX	92636602	92636603	HoneydewSepia0236-MS-2	77	-	Amer1	Amer1
chrX	161747172	161747173	HoneydewSepia0187-MS-2	77	-	Glra2	Glra2
chr1	72587099	72587100	HoneydewSepia0187-MS-2	76	-
chr1	77473164	77473165	HoneydewSepia0236-MS-3	76	+	Epha4
chr1	108077328	108077329	HoneyDewSepia0236-MS-1	76	+	Phlpp1	Phlpp1
chr1	121536003	121536004	HoneydewSepia0236-MS-3	76	-	Epb4.1l5	Epb4.1l5
chr1	145439328	145439329	HoneydewSepia0236-MS-3	76	+
chr1	145650973	145650974	HoneydewSepia0236-MS-3	76	-	Uchl5
chr1	148370219	148370220	HoneydewSepia0236-MS-3	76	-	Brinp3
chr1	150748826	150748827	HoneydewSepia0236-MS-3	76	-
chr1	154369916	154369917	HoneydewSepia0187-MS-2	76	-	Rgl1	Rgl1
chr1	182193591	182193592	HoneydewSepia0187-MS-2	76	-
chr1	195796614	195796615	HoneydewSepia0236-MS-3	76	+
chr11	6798346	6798347	HoneydewSepia0236-MS-2	76	-
chr11	35756110	35756111	HoneydewSepia0187-MS-2	76	-	Wwc1	Wwc1
chr12	28953070	28953071	HoneydewSepia0236-MS-2	76	-
chr13	59884586	59884587	HoneydewSepia0187-MS-2	76	-	Zcchc6	Zcchc6
chr14	71115232	71115233	HoneydewSepia0187-MS-2	76	+	Xpo7
chr15	16178726	16178727	HoneydewSepia0236-MS-3	76	+
chr17	25354550	25354551	HoneydewSepia0236-MS-3	76	-	Unkl
chr19	4568046	4568047	HoneydewSepia0187-MS-2	76	+	Pcx	Pcx
chr2	99916527	99916528	HoneydewSepia0236-MS-3	76	-
chr3	19208995	19208996	HoneydewSepia0236-MS-2	76	-	Pde7a	Pde7a
chr3	52875083	52875084	HoneydewSepia0187-MS-2	76	-	Lhfp
chr4	44906467	44906468	HoneydewSepia0236-MS-2	76	+	Zcchc7	Zcchc7
chr4	104221581	104221582	HoneydewSepia0236-MS-3	76	+	Dab1	Dab1
chr4	118362679	118362680	HoneydewSepia0236-MS-3	76	+	Olfr1342
chr5	35553424	35553425	HoneydewSepia0236-MS-3	76	-
chr5	66770341	66770342	HoneydewSepia0236-MS-3	76	+	Apbb2
chr5	114068672	114068673	HoneydewSepia0236-MS-3	76	+	Cmklr1
chr6	22091786	22091787	HoneydewSepia0187-MS-2	76	-	Cped1
chr6	86595913	86595914	HoneydewSepia0236-MS-2	76	-
chr6	100396919	100396920	HoneydewSepia0187-MS-2	76	+
chr7	81836415	81836416	HoneydewSepia0236-MS-3	76	-
chr7	96103664	96103665	HoneydewSepia0236-MS-3	76	+
chr7	107546236	107546237	HoneydewSepia0236-MS-3	76	+	C2cd3	C2cd3
chr8	47210153	47210154	HoneydewSepia0236-MS-2	76	+
chr8	66043113	66043114	HoneydewSepia0236-MS-2	76	-
chr8	96549416	96549417	HoneydewSepia0236-MS-2	76	+	Nudt21
chrX	74824602	74824603	HoneydewSepia0187-MS-2	76	-	Tbl1x
chr1	54471196	54471197	HoneydewSepia0187-MS-2	75	+	Gtf3c3
chr1	58460248	58460249	HoneydewSepia0187-MS-2	75	-	Bzw1
chr1	100482893	100482894	HoneydewSepia0187-MS-2	75	-
chr1	104691618	104691619	HoneydewSepia0236-MS-2	75	+
chr1	105897794	105897795	HoneydewSepia0236-MS-3	75	+
chr1	166384333	166384334	HoneydewSepia0236-MS-3	75	+	Atp1b1
chr1	182672347	182672348	HoneydewSepia0187-MS-2	75	+	Acbd3	Acbd3
chr1	193202085	193202086	HoneydewSepia0236-MS-3	75	+	Ppp2r5a
chr1	195943216	195943217	HoneydewSepia0187-MS-2	75	-
chr10	6056635	6056636	HoneydewSepia0236-MS-3	75	-	Akap12	Akap12
chr10	21376379	21376380	HoneydewSepia0236-MS-3	75	+
chr10	62759415	62759416	HoneydewSepia0236-MS-3	75	-	Herc4
chr11	33573750	33573751	HoneydewSepia0236-MS-3	75	+	Kcnip1
chr12	16554755	16554756	HoneydewSepia0236-MS-2	75	-	Lpin1	Lpin1
chr13	80853368	80853369	HoneydewSepia0187-MS-2	75	+
chr13	81030024	81030025	HoneydewSepia0236-MS-2	75	+	Arrdc3	Arrdc3
chr14	8699035	8699036	HoneydewSepia0187-MS-2	75	+	Flnb	Flnb
chr14	9670226	9670227	HoneydewSepia0187-MS-2	75	+
chr14	52738742	52738743	HoneydewSepia0187-MS-2	75	-	Rpgrip1
chr14	119951703	119951704	HoneydewSepia0187-MS-2	75	+	Hs6st3	Hs6st3
chr15	4161632	4161633	HoneydewSepia0236-MS-3	75	-
chr15	80659796	80659797	HoneydewSepia0236-MS-2	75	+	Tnrc6b	Tnrc6b
chr15	99694258	99694259	HoneydewSepia0236-MS-2	75	+	Lima1
chr16	59121154	59121155	HoneydewSepia0187-MS-2	75	+
chr19	48836563	48836564	HoneydewSepia0187-MS-2	75	-	Sorcs3
chr2	54482865	54482866	HoneydewSepia0187-MS-2	75	-	Galnt13
chr2	70219065	70219066	HoneydewSepia0236-MS-3	75	+	Myo3b	Myo3b
chr3	21068079	21068080	HoneydewSepia0236-MS-3	75	+
chr3	42088418	42088419	HoneydewSepia0187-MS-2	75	+
chr4	30025480	30025481	HoneydewSepia0236-MS-2	75	+
chr4	134158213	134158214	HoneydewSepia0236-MS-2	75	+	Man1c1
chr5	14278209	14278210	HoneydewSepia0236-MS-3	75	+
chr5	40613848	40613849	HoneydewSepia0187-MS-2	75	+
chr5	117702376	117702377	HoneydewSepia0236-MS-3	75	+	Taok3	Taok3
chr6	24097054	24097055	HoneydewSepia0236-MS-2	75	-	Slc13a1	Slc13a1
chr6	119070123	119070124	HoneydewSepia0187-MS-2	75	+	Cacna1c
chr7	27942245	27942246	HoneydewSepia0187-MS-2	75	+	Cyp2t4	Cyp2t4
chr7	29345637	29345638	HoneydewSepia0187-MS-2	75	+	Pak4
chr7	129289903	129289904	HoneydewSepia0187-MS-2	75	-	Dctn5
chr7	133314461	133314462	HoneydewSepia0187-MS-2	75	+	Xpo6
chr7	134795380	134795381	HoneydewSepia0236-MS-3	75	+
chr7	138274866	138274867	HoneydewSepia0187-MS-2	75	-
chr7	140036483	140036484	HoneydewSepia0187-MS-2	75	+	Mettl10
chr9	120664554	120664555	HoneydewSepia0236-MS-3	75	+
chrUn_random	5028008	5028009	HoneydewSepia0187-MS-2	75	+
chrX	70084687	70084688	HoneydewSepia0236-MS-3	75	+	Gabrq	Gabrq
chrX	81148832	81148833	HoneydewSepia0236-MS-2	75	+	Dmd	Dmd
chrX	136205359	136205360	HoneydewSepia0187-MS-2	75	-	Rnf128
chrX	137786847	137786848	HoneydewSepia0236-MS-3	75	+	Col4a6
chr1	27879826	27879827	HoneydewSepia0236-MS-3	74	+
chr1	44355278	44355279	HoneydewSepia0187-MS-2	74	+
chr1	47585271	47585272	HoneydewSepia0187-MS-2	74	+
chr1	91688518	91688519	HoneydewSepia0187-MS-2	74	-	Agap1
chr1	106753991	106753992	HoneydewSepia0236-MS-2	74	-	Cdh20
chr1	116625650	116625651	HoneydewSepia0187-MS-2	74	-
chr1	126346397	126346398	HoneydewSepia0236-MS-3	74	-
chr1	146033182	146033183	HoneydewSepia0236-MS-2	74	-
chr1	170706938	170706939	HoneydewSepia0236-MS-3	74	-
chr10	107773313	107773314	HoneydewSepia0187-MS-2	74	+	Pawr	Pawr
chr10	109187796	109187797	HoneydewSepia0187-MS-2	74	+	Nav3
chr11	3056393	3056394	HoneydewSepia0187-MS-2	74	-	Sfi1	Sfi1
chr11	35602473	35602474	HoneydewSepia0187-MS-2	74	-	Pank3
chr11	72802239	72802240	HoneydewSepia0187-MS-2	74	-	Atp2a3
chr11	77416099	77416100	HoneydewSepia0236-MS-2	74	+	Taok1
chr11	120796106	120796107	HoneydewSepia0236-MS-3	74	-
chr12	52918145	52918146	HoneydewSepia0236-MS-3	74	-	Hectd1	Hectd1
chr13	34438267	34438268	HoneydewSepia0236-MS-2	74	+
chr14	13946884	13946885	HoneydewSepia0187-MS-2	74	-
chr14	22131882	22131883	HoneydewSepia0236-MS-3	74	-	Adk
chr15	20650246	20650247	HoneydewSepia0236-MS-3	74	+
chr15	95456173	95456174	HoneydewSepia0236-MS-3	74	+	Dbx2
chr16	4151278	4151279	HoneydewSepia0236-MS-3	74	-	Crebbp	Crebbp
chr16	24385667	24385668	HoneydewSepia0236-MS-3	74	-
chr17	14738503	14738504	HoneydewSepia0236-MS-3	74	+
chr18	19267334	19267335	HoneydewSepia0236-MS-3	74	-
chr19	34036471	34036472	HoneydewSepia0236-MS-2	74	-	Lipf
chr2	52596942	52596943	HoneydewSepia0187-MS-2	74	-	Stam2	Stam2
chr2	91685532	91685533	HoneydewSepia0236-MS-3	74	+	Ambra1	Ambra1
chr3	39979037	39979038	HoneydewSepia0187-MS-2	74	+
chr4	34117113	34117114	HoneydewSepia0187-MS-2	74	+	Spaca1
chr4	104837586	104837587	HoneydewSepia0236-MS-3	74	-	Ppap2b
chr4	107023063	107023064	HoneydewSepia0236-MS-3	74	-	Yipf1
chr5	27301104	27301105	HoneydewSepia0187-MS-2	74	+	Dpp6	Dpp6
chr5	111287758	111287759	HoneydewSepia0236-MS-3	74	+	Chek2	Chek2
chr6	30006976	30006977	HoneydewSepia0187-MS-2	74	-	Nrf1
chr7	17588899	17588900	HoneydewSepia0236-MS-2	74	+
chr8	16204093	16204094	HoneydewSepia0187-MS-2	74	+	Csmd1
chr8	72237450	72237451	HoneydewSepia0187-MS-2	74	-	Zfp869	Zfp869
chr8	94224892	94224893	HoneydewSepia0236-MS-2	74	-
chr9	62780151	62780152	HoneydewSepia0187-MS-2	74	-	Pias1	Pias1
chr9	101416416	101416417	HoneydewSepia0236-MS-2	74	-
chrX	12545663	12545664	HoneydewSepia0236-MS-3	74	+
chrX	14581000	14581001	HoneydewSepia0236-MS-3	74	+
chr1	51936732	51936733	HoneydewSepia0236-MS-3	73	-	Myo1b	Myo1b
chr1	59694428	59694429	HoneydewSepia0236-MS-3	73	-
chr1	87734199	87734200	HoneydewSepia0236-MS-3	73	-	Cab39
chr1	90850402	90850403	HoneydewSepia0187-MS-2	73	-
chr1	136360694	136360695	HoneydewSepia0187-MS-2	73	+	Klhl12	Klhl12
chr1	141343155	141343156	HoneydewSepia0187-MS-2	73	-	Zbtb41
chr1	146876822	146876823	HoneydewSepia0187-MS-2	73	-
chr1	148407965	148407966	HoneydewSepia0187-MS-2	73	-	Brinp3
chr1	178707870	178707871	HoneydewSepia0236-MS-3	73	+	Cep170
chr1	197068248	197068249	HoneydewSepia0187-MS-2	73	+
chr10	70452877	70452878	HoneydewSepia0187-MS-2	73	+	Bicc1
chr11	93906727	93906728	HoneydewSepia0236-MS-2	73	+	Spag9	Spag9
chr12	60714732	60714733	HoneydewSepia0236-MS-2	73	-
chr12	67519338	67519339	HoneydewSepia0187-MS-2	73	-
chr12	70737596	70737597	HoneydewSepia0236-MS-2	73	-	Sos2	Sos2
chr12	88526955	88526956	HoneydewSepia0236-MS-2	73	-	Tmed8	Tmed8
chr13	43531817	43531818	HoneydewSepia0236-MS-3	73	-	Ranbp9	Ranbp9
chr14	32210545	32210546	HoneydewSepia0236-MS-3	73	+	Sh3bp5
chr14	39197720	39197721	HoneydewSepia0236-MS-3	73	-	Nrg3	Nrg3
chr14	101023418	101023419	HoneydewSepia0236-MS-3	73	-
chr15	30685059	30685060	HoneydewSepia0236-MS-2	73	+	Ctnnd2	Ctnnd2
chr15	41495510	41495511	HoneydewSepia0187-MS-2	73	+	Oxr1	Oxr1
chr16	4196933	4196934	HoneydewSepia0187-MS-2	73	-	Crebbp	Crebbp
chr16	37471380	37471381	HoneydewSepia0236-MS-3	73	+
chr16	40361819	40361820	HoneydewSepia0236-MS-3	73	+
chr16	53723795	53723796	HoneydewSepia0236-MS-3	73	+
chr16	77713717	77713718	HoneydewSepia0187-MS-2	73	-
chr17	31237633	31237634	HoneydewSepia0236-MS-3	73	-	Abcg1
chr18	36814316	36814317	HoneydewSepia0236-MS-3	73	-	Ankhd1
chr19	17657486	17657487	HoneydewSepia0187-MS-2	73	+	Pcsk5
chr2	71854156	71854157	HoneydewSepia0187-MS-2	73	+	Rapgef4	Rapgef4
chr2	77654505	77654506	HoneydewSepia0236-MS-3	73	+	Zfp385b
chr2	94251753	94251754	HoneydewSepia0236-MS-2	73	+	2810002D19Rik	2810002D19Rik
chr2	96598932	96598933	HoneydewSepia0187-MS-2	73	+	Lrrc4c	Lrrc4c
chr2	117358907	117358908	HoneydewSepia0236-MS-3	73	-
chr2	134825379	134825380	HoneydewSepia0187-MS-2	73	-	Plcb1
chr3	24792839	24792840	HoneydewSepia0236-MS-2	73	-
chr4	44693284	44693285	HoneydewSepia0187-MS-2	73	+	Pax5
chr4	121735783	121735784	HoneydewSepia0187-MS-2	73	-
chr5	17160777	17160778	HoneydewSepia0187-MS-2	73	+	Sema3c	Sema3c
chr5	45456112	45456113	HoneydewSepia0187-MS-2	73	+
chr6	48046292	48046293	HoneydewSepia0187-MS-2	73	+
chr6	48374307	48374308	HoneydewSepia0187-MS-2	73	-
chr6	57057088	57057089	HoneydewSepia0236-MS-3	73	+
chr6	85771372	85771373	HoneydewSepia0187-MS-2	73	+
chr6	104199518	104199519	HoneydewSepia0187-MS-2	73	+
chr7	102169870	102169871	HoneydewSepia0236-MS-3	73	-
chr7	135064455	135064456	HoneydewSepia0236-MS-3	73	+	Kat8	Kat8
chr7	138771016	138771017	HoneydewSepia0187-MS-2	73	+
chr8	67852201	67852202	HoneydewSepia0187-MS-2	73	-
chr8	89201628	89201629	HoneydewSepia0236-MS-3	73	+	Lonp2	Lonp2
chr9	95790767	95790768	HoneydewSepia0236-MS-2	73	-	Atr
chrX	80958277	80958278	HoneydewSepia0187-MS-2	73	-	Dmd
chr1	4953097	4953098	HoneydewSepia0187-MS-2	72	-	Rgs20	Rgs20
chr1	5252429	5252430	HoneydewSepia0187-MS-2	72	-
chr1	12883435	12883436	HoneydewSepia0187-MS-2	72	-	Slco5a1	Slco5a1
chr1	26749286	26749287	HoneydewSepia0236-MS-2	72	-
chr1	30532088	30532089	HoneydewSepia0187-MS-2	72	-
chr1	41784774	41784775	HoneydewSepia0236-MS-3	72	-
chr1	42913767	42913768	HoneydewSepia0236-MS-2	72	-	Mrps9
chr1	64892221	64892222	HoneydewSepia0236-MS-2	72	+	Plekhm3
chr1	110977837	110977838	HoneydewSepia0187-MS-2	72	+
chr1	130145677	130145678	HoneydewSepia0236-MS-2	72	+	Ubxn4	Ubxn4
chr1	139864088	139864089	HoneydewSepia0236-MS-3	72	+
chr1	148871071	148871072	HoneydewSepia0187-MS-2	72	+
chr1	174428253	174428254	HoneydewSepia0236-MS-3	72	+	Igsf9	Igsf9
chr1	190218763	190218764	HoneydewSepia0236-MS-3	72	+	Ush2a	Ush2a
chr10	13698661	13698662	HoneydewSepia0236-MS-3	72	-	Hivep2
chr10	27936075	27936076	HoneydewSepia0187-MS-2	72	+	Ptprk	Ptprk
chr11	68632246	68632247	HoneydewSepia0187-MS-2	72	+
chr12	9006143	9006144	HoneydewSepia0236-MS-3	72	-	Wdr35
chr13	32716429	32716430	HoneydewSepia0236-MS-2	72	-
chr13	83213079	83213080	HoneydewSepia0236-MS-3	72	-
chr15	76615024	76615025	HoneydewSepia0236-MS-2	72	+	Arhgap39
chr17	51803350	51803351	HoneydewSepia0236-MS-3	72	-
chr17	63684466	63684467	HoneydewSepia0236-MS-3	72	+	Fbxl17
chr17	67140467	67140468	HoneydewSepia0236-MS-3	72	-	Ptprm	Ptprm
chr18	45498236	45498237	HoneydewSepia0236-MS-3	72	+
chr18	75419022	75419023	HoneydewSepia0187-MS-2	72	-	Dym
chr18	75626208	75626209	HoneydewSepia0236-MS-2	72	-	Ctif	Ctif
chr19	59095263	59095264	HoneydewSepia0187-MS-2	72	+	4930506M07Rik
chr2	4811317	4811318	HoneydewSepia0236-MS-2	72	-	Sephs1
chr2	6083404	6083405	HoneydewSepia0236-MS-3	72	+
chr2	107260379	107260380	HoneydewSepia0236-MS-2	72	-
chr2	170496966	170496967	HoneydewSepia0187-MS-2	72	+
chr3	31955723	31955724	HoneydewSepia0236-MS-3	72	+	Kcnmb2	Kcnmb2
chr3	54934543	54934544	HoneydewSepia0187-MS-2	72	-	Spg20
chr3	138891486	138891487	HoneydewSepia0236-MS-3	72	-	Stpg2
chr4	96327738	96327739	HoneydewSepia0187-MS-2	72	+	Cyp2j5
chr4	133261031	133261032	HoneydewSepia0187-MS-2	72	-	Arid1a	Arid1a
chr5	47770932	47770933	HoneydewSepia0187-MS-2	72	-
chr5	115995883	115995884	HoneydewSepia0236-MS-2	72	+	Pxn	Pxn
chr5	133145668	133145669	HoneydewSepia0236-MS-2	72	+
chr5	134792438	134792439	HoneydewSepia0236-MS-2	72	-
chr6	15161557	15161558	HoneydewSepia0236-MS-3	72	+	Foxp2	Foxp2
chr6	50223346	50223347	HoneydewSepia0236-MS-3	72	-
chr6	74433773	74433774	HoneydewSepia0236-MS-3	72	-
chr6	135186238	135186239	HoneydewSepia0236-MS-2	72	-	8430419L09Rik
chr7	18673579	18673580	HoneydewSepia0236-MS-3	72	-
chr8	16352516	16352517	HoneydewSepia0187-MS-2	72	-	Csmd1	Csmd1
chr8	90747018	90747019	HoneydewSepia0187-MS-2	72	+	Papd5	Papd5
chr9	26583902	26583903	HoneydewSepia0187-MS-2	72	+	Glb1l2
chr9	38694652	38694653	HoneydewSepia0236-MS-3	72	-
chr9	110111713	110111714	HoneydewSepia0187-MS-2	72	+	Smarcc1	Smarcc1
chrX	39386835	39386836	HoneydewSepia0236-MS-3	72	+
chrX	39627758	39627759	HoneydewSepia0187-MS-2	72	-	Stag2
chrX	137103132	137103133	HoneydewSepia0236-MS-3	72	-	Tsc22d3	Tsc22d3
chrX	157154845	157154846	HoneydewSepia0236-MS-2	72	-	Ppef1	Ppef1
chr1	24321168	24321169	HoneydewSepia0187-MS-2	71	-	Col19a1	Col19a1
chr1	32510480	32510481	HoneydewSepia0187-MS-2	71	+	Khdrbs2	Khdrbs2
chr1	68464030	68464031	HoneydewSepia0187-MS-2	71	-	Erbb4	Erbb4
chr1	84823826	84823827	HoneydewSepia0236-MS-3	71	+	Trip12
chr1	89112893	89112894	HoneydewSepia0236-MS-3	71	+	Eif4e2	Eif4e2
chr1	92966480	92966481	HoneydewSepia0187-MS-2	71	-	Lrrfip1
chr1	96340783	96340784	HoneydewSepia0187-MS-2	71	-
chr1	97046840	97046841	HoneydewSepia0187-MS-2	71	+
chr1	97262797	97262798	HoneydewSepia0187-MS-2	71	+
chr1	98188067	98188068	HoneydewSepia0187-MS-2	71	-
chr1	98751017	98751018	HoneydewSepia0236-MS-2	71	+	Slco4c1
chr1	107573861	107573862	HoneydewSepia0187-MS-2	71	+	2310035C23Rik	2310035C23Rik
chr1	128114114	128114115	HoneydewSepia0236-MS-2	71	-	Nckap5	Nckap5
chr1	150203359	150203360	HoneydewSepia0187-MS-2	71	+
chr1	164261476	164261477	HoneydewSepia0187-MS-2	71	-	Dnm3	Dnm3
chr1	170981083	170981084	HoneydewSepia0187-MS-2	71	+
chr1	173255967	173255968	HoneydewSepia0187-MS-2	71	+
chr1	177929427	177929428	HoneydewSepia0187-MS-2	71	+	Pld5
chr1	181704485	181704486	HoneydewSepia0236-MS-3	71	+	Ahctf1
chr10	28417281	28417282	HoneydewSepia0236-MS-2	71	-	Themis
chr10	62598529	62598530	HoneydewSepia0236-MS-3	71	+	Mypn
chr11	34651569	34651570	HoneydewSepia0187-MS-2	71	+
chr11	49662084	49662085	HoneydewSepia0236-MS-2	71	+	Mapk9	Mapk9
chr11	54312417	54312418	HoneydewSepia0236-MS-2	71	+	Fnip1	Fnip1
chr11	65577680	65577681	HoneydewSepia0187-MS-2	71	+	Map2k4
chr11	104216210	104216211	HoneydewSepia0187-MS-2	71	+	Kansl1
chr12	21361056	21361057	HoneydewSepia0236-MS-3	71	+	Adam17
chr12	114060823	114060824	HoneydewSepia0236-MS-3	71	+	Cdca4
chr13	23880615	23880616	HoneydewSepia0236-MS-2	71	+	Trim38	Trim38
chr14	14072676	14072677	HoneydewSepia0236-MS-3	71	-	Gm5087	Gm5087
chr14	91669203	91669204	HoneydewSepia0236-MS-2	71	-
chr16	79965207	79965208	HoneydewSepia0187-MS-2	71	+
chr16	84704449	84704450	HoneydewSepia0187-MS-2	71	+
chr16	88994884	88994885	HoneydewSepia0236-MS-3	71	+
chr18	44559927	44559928	HoneydewSepia0236-MS-2	71	-	Dcp2
chr19	5680854	5680855	HoneydewSepia0236-MS-3	71	+	Pcnxl3
chr19	7503067	7503068	HoneydewSepia0187-MS-2	71	+	Rtn3
chr19	13726375	13726376	HoneydewSepia0236-MS-2	71	+
chr19	28369304	28369305	HoneydewSepia0187-MS-2	71	+	Glis3
chr19	41319850	41319851	HoneydewSepia0187-MS-2	71	+	Tm9sf3
chr3	127244000	127244001	HoneydewSepia0236-MS-2	71	+	Larp7
chr4	109091182	109091183	HoneydewSepia0187-MS-2	71	-	Ttc39a
chr5	15563493	15563494	HoneydewSepia0187-MS-2	71	-	Cacna2d1
chr5	75683994	75683995	HoneydewSepia0236-MS-2	71	+
chr5	78316370	78316371	HoneydewSepia0187-MS-2	71	-
chr5	79766768	79766769	HoneydewSepia0236-MS-3	71	-
chr5	121996789	121996790	HoneydewSepia0236-MS-2	71	-
chr5	140728168	140728169	HoneydewSepia0236-MS-2	71	-	Mad1l1	Mad1l1
chr6	70915003	70915004	HoneydewSepia0236-MS-3	71	-
chr6	104139228	104139229	HoneydewSepia0236-MS-3	71	+
chr6	146501805	146501806	HoneydewSepia0236-MS-3	71	+	Asun
chr7	99652553	99652554	HoneydewSepia0187-MS-2	71	-
chr7	106726413	106726414	HoneydewSepia0236-MS-3	71	+	Arrb1	Arrb1
chr7	127329031	127329032	HoneydewSepia0187-MS-2	71	-
chr8	11314925	11314926	HoneydewSepia0236-MS-3	71	-	Col4a2
chr8	12189915	12189916	HoneydewSepia0236-MS-3	71	-
chr8	13479967	13479968	HoneydewSepia0187-MS-2	71	-	Gas6	Gas6
chr8	72486893	72486894	HoneydewSepia0236-MS-2	71	-	Gatad2a	Gatad2a
chr9	84259716	84259717	HoneyDewSepia0236-MS-1	71	+
chr9	102930339	102930340	HoneydewSepia0236-MS-3	71	+	Slco2a1	Slco2a1
chrX	13999284	13999285	HoneydewSepia0236-MS-2	71	-
chrX	156770681	156770682	HoneydewSepia0187-MS-2	71	-
chrX	164423874	164423875	HoneydewSepia0187-MS-2	71	-	Frmpd4	Frmpd4
chr1	17342056	17342057	HoneydewSepia0236-MS-3	70	+
chr1	26393510	26393511	HoneydewSepia0187-MS-2	70	+
chr1	30493025	30493026	HoneydewSepia0187-MS-2	70	-
chr1	54885670	54885671	HoneydewSepia0236-MS-2	70	-	Ankrd44	Ankrd44
chr1	84774942	84774943	HoneydewSepia0236-MS-2	70	-	Trip12	Trip12
chr1	122409157	122409158	HoneydewSepia0236-MS-3	70	-
chr1	126335815	126335816	HoneydewSepia0187-MS-2	70	-
chr1	127492102	127492103	HoneydewSepia0236-MS-3	70	-	Slc35f5
chr1	140050008	140050009	HoneydewSepia0236-MS-2	70	-	Ptprc	Ptprc
chr1	152286755	152286756	HoneydewSepia0187-MS-2	70	+	Tpr	Tpr
chr1	161870161	161870162	HoneydewSepia0236-MS-2	70	+
chr1	196130152	196130153	HoneydewSepia0187-MS-2	70	+
chr10	32893788	32893789	HoneydewSepia0236-MS-3	70	+	Trdn	Trdn
chr10	39949581	39949582	HoneydewSepia0187-MS-2	70	-	Rpf2	Rpf2
chr10	69264809	69264810	HoneydewSepia0236-MS-2	70	-	Ank3
chr11	33979923	33979924	HoneydewSepia0187-MS-2	70	-	Lcp2
chr13	17797266	17797267	HoneydewSepia0187-MS-2	70	+
chr13	86919109	86919110	HoneydewSepia0236-MS-3	70	+
chr14	9888932	9888933	HoneydewSepia0187-MS-2	70	+
chr14	17421796	17421797	HoneydewSepia0236-MS-2	70	-	Rarb	Rarb
chr14	26682186	26682187	HoneydewSepia0236-MS-3	70	-	Anxa11
chr14	81028511	81028512	HoneydewSepia0187-MS-2	70	+
chr15	35568753	35568754	HoneydewSepia0236-MS-3	70	+	Vps13b	Vps13b
chr15	63268138	63268139	HoneydewSepia0236-MS-3	70	-	Gm20740	Gm20740
chr15	65635655	65635656	HoneydewSepia0236-MS-3	70	+	Efr3a	Efr3a
chr16	28589082	28589083	HoneydewSepia0187-MS-2	70	+	Fgf12
chr18	17692882	17692883	HoneydewSepia0187-MS-2	70	-
chr18	29862655	29862656	HoneydewSepia0236-MS-3	70	-
chr18	83769489	83769490	HoneydewSepia0187-MS-2	70	-
chr2	48678416	48678417	HoneydewSepia0187-MS-2	70	-	Acvr2a
chr2	68308875	68308876	HoneydewSepia0187-MS-2	70	+	Stk39
chr2	146606386	146606387	HoneydewSepia0187-MS-2	70	-
chr3	30330230	30330231	HoneydewSepia0236-MS-2	70	-	Mecom	Mecom
chr4	11075277	11075278	HoneydewSepia0187-MS-2	70	+
chr4	63061506	63061507	HoneydewSepia0236-MS-2	70	-	Akna	Akna
chr4	71822717	71822718	HoneydewSepia0187-MS-2	70	+	Tle1
chr4	83077735	83077736	HoneydewSepia0236-MS-3	70	+	Snapc3	Snapc3
chr4	106168177	106168178	HoneydewSepia0236-MS-3	70	+
chr5	15742445	15742446	HoneydewSepia0187-MS-2	70	+	Cacna2d1	Cacna2d1
chr5	29652882	29652883	HoneydewSepia0236-MS-2	70	+	Lmbr1
chr5	41067933	41067934	HoneydewSepia0236-MS-2	70	-
chr6	24580851	24580852	HoneydewSepia0236-MS-3	70	+	Wasl
chr6	77243436	77243437	HoneydewSepia0236-MS-2	70	+	Ctnna2
chr6	93962950	93962951	HoneydewSepia0236-MS-3	70	+	Magi1
chr6	105048278	105048279	HoneydewSepia0187-MS-2	70	+
chr7	5233114	5233115	HoneydewSepia0236-MS-3	70	+
chr7	13054318	13054319	HoneydewSepia0236-MS-3	70	+
chr7	119987264	119987265	HoneydewSepia0187-MS-2	70	-	Tead1
chr8	31630734	31630735	HoneydewSepia0236-MS-3	70	-
chr8	91413312	91413313	HoneydewSepia0236-MS-3	70	+
chr9	9931796	9931797	HoneydewSepia0236-MS-2	70	-	Cntn5	Cntn5
chrX	69591862	69591863	HoneydewSepia0187-MS-2	70	-
chrX	82786980	82786981	HoneydewSepia0236-MS-2	70	+
chrX	165796090	165796091	HoneydewSepia0187-MS-2	70	-
chr1	17903361	17903362	HoneydewSepia0236-MS-3	69	-
chr1	19132364	19132365	HoneydewSepia0236-MS-3	69	+	Tfap2d	Tfap2d
chr1	41547276	41547277	HoneydewSepia0236-MS-2	69	-
chr1	45803568	45803569	HoneydewSepia0187-MS-2	69	-
chr1	55401886	55401887	HoneydewSepia0236-MS-3	69	-	Boll	Boll
chr1	101764018	101764019	HoneydewSepia0236-MS-2	69	+	Cntnap5b	Cntnap5b
chr1	110779455	110779456	HoneydewSepia0187-MS-2	69	-
chr1	116146861	116146862	HoneydewSepia0187-MS-2	69	-
chr1	118591649	118591650	HoneydewSepia0187-MS-2	69	-
chr1	132771855	132771856	HoneydewSepia0236-MS-2	69	-	Faim3
chr1	140597172	140597173	HoneydewSepia0236-MS-2	69	-
chr1	141180667	141180668	HoneydewSepia0187-MS-2	69	+	Crb1
chr1	143054692	143054693	HoneydewSepia0187-MS-2	69	-
chr1	152019183	152019184	HoneydewSepia0236-MS-3	69	-
chr1	163689161	163689162	HoneydewSepia0236-MS-3	69	+
chr1	163797690	163797691	HoneydewSepia0187-MS-2	69	+	Suco
chr1	167405686	167405687	HoneydewSepia0236-MS-3	69	+	Mpc2	Mpc2
chr1	177529375	177529376	HoneydewSepia0187-MS-2	69	+
chr11	20112842	20112843	HoneydewSepia0236-MS-2	69	-	Rab1
chr11	29752458	29752459	HoneydewSepia0236-MS-3	69	-	Eml6	Eml6
chr11	30743265	30743266	HoneydewSepia0187-MS-2	69	-	Psme4
chr11	84436554	84436555	HoneydewSepia0187-MS-2	69	+
chr11	88517993	88517994	HoneydewSepia0187-MS-2	69	-	Msi2	Msi2
chr11	101661039	101661040	HoneydewSepia0187-MS-2	69	-
chr11	106015137	106015138	HoneydewSepia0187-MS-2	69	-	Map3k3
chr12	76607697	76607698	HoneydewSepia0236-MS-3	69	-	Ppp2r5e	Ppp2r5e
chr13	42206427	42206428	HoneydewSepia0187-MS-2	69	+	Hivep1	Hivep1
chr13	109445266	109445267	HoneydewSepia0236-MS-2	69	+	Pde4d	Pde4d
chr14	27413355	27413356	HoneydewSepia0236-MS-3	69	+	Dennd6a	Dennd6a
chr14	89809278	89809279	HoneydewSepia0236-MS-2	69	+
chr14	104818912	104818913	HoneydewSepia0187-MS-2	69	+
chr15	18493131	18493132	HoneydewSepia0187-MS-2	69	-
chr15	26764326	26764327	HoneydewSepia0187-MS-2	69	-	Fbxl7	Fbxl7
chr15	49371969	49371970	HoneydewSepia0187-MS-2	69	-
chr16	13663018	13663019	HoneydewSepia0236-MS-3	69	-	Parn	Parn
chr16	52427488	52427489	HoneydewSepia0187-MS-2	69	-	Alcam	Alcam
chr17	5998017	5998018	HoneydewSepia0236-MS-2	69	+	Synj2	Synj2
chr18	30535773	30535774	HoneydewSepia0187-MS-2	69	+
chr18	50086706	50086707	HoneydewSepia0187-MS-2	69	+	Dmxl1	Dmxl1
chr19	3546586	3546587	HoneydewSepia0236-MS-3	69	+	Ppp6r3
chr19	30151084	30151085	HoneydewSepia0187-MS-2	69	-	Uhrf2
chr19	47340076	47340077	HoneydewSepia0187-MS-2	69	-	Sh3pxd2a	Sh3pxd2a
chr19	51766501	51766502	HoneydewSepia0236-MS-2	69	-
chr2	18106845	18106846	HoneydewSepia0236-MS-2	69	-	Mllt10
chr2	163517958	163517959	HoneydewSepia0187-MS-2	69	+	Pkig	Pkig
chr3	9473171	9473172	HoneydewSepia0187-MS-2	69	-	Zfp704	Zfp704
chr3	95238932	95238933	HoneydewSepia0236-MS-3	69	-	Arnt
chr3	151055235	151055236	HoneydewSepia0187-MS-2	69	-
chr4	97025079	97025080	HoneydewSepia0236-MS-3	69	+
chr4	118808529	118808530	HoneydewSepia0236-MS-2	69	-	Slc2a1
chr5	63044560	63044561	HoneydewSepia0187-MS-2	69	-	Arap2	Arap2
chr5	65666713	65666714	HoneydewSepia0187-MS-2	69	-	Rfc1	Rfc1
chr5	115165029	115165030	HoneydewSepia0187-MS-2	69	-	Tchp
chr5	145068691	145068692	HoneydewSepia0187-MS-2	69	-	Baiap2l1	Baiap2l1
chr6	29530700	29530701	HoneydewSepia0236-MS-2	69	-	Tnpo3	Tnpo3
chr6	118087547	118087548	HoneydewSepia0236-MS-2	69	-	Csgalnact2	Csgalnact2
chr7	57860147	57860148	HoneydewSepia0187-MS-2	69	+	Nell1	Nell1
chr7	73716109	73716110	HoneydewSepia0187-MS-2	69	-
chr7	126065028	126065029	HoneydewSepia0187-MS-2	69	+	Iqck	Iqck
chr7	139495052	139495053	HoneydewSepia0236-MS-3	69	-	Chst15	Chst15
chr7	140273165	140273166	HoneydewSepia0236-MS-2	69	-	Ctbp2	Ctbp2
chr8	13882948	13882949	HoneydewSepia0187-MS-2	69	-
chr8	68917227	68917228	HoneydewSepia0236-MS-2	69	-	2018-03-01
chr8	75661237	75661238	HoneydewSepia0236-MS-3	69	-	Large	Large
chr8	120934270	120934271	HoneydewSepia0187-MS-2	69	+	Cdh13	Cdh13
chr9	97344924	97344925	HoneydewSepia0236-MS-3	69	+	Clstn2
chr9	108164782	108164783	HoneydewSepia0187-MS-2	69	-	Dag1	Dag1
chr9	117399646	117399647	HoneydewSepia0187-MS-2	69	+	Rbms3
chrX	58963221	58963222	HoneydewSepia0236-MS-2	69	-	Ldoc1
chr1	13169869	13169870	HoneydewSepia0187-MS-2	68	-	Ncoa2	Ncoa2
chr1	34178945	34178946	HoneydewSepia0236-MS-2	68	+	Dst	Dst
chr1	58791962	58791963	HoneydewSepia0236-MS-3	68	+	Cflar	Cflar
chr1	60003118	60003119	HoneydewSepia0236-MS-3	68	+	Fam117b	Fam117b
chr1	68108531	68108532	HoneydewSepia0187-MS-2	68	-	Erbb4	Erbb4
chr1	68522174	68522175	HoneydewSepia0236-MS-2	68	-	Erbb4	Erbb4
chr1	68925642	68925643	HoneydewSepia0187-MS-2	68	+	Erbb4
chr1	80621846	80621847	HoneydewSepia0187-MS-2	68	-	Dock10	Dock10
chr1	80851842	80851843	HoneydewSepia0236-MS-2	68	+
chr1	96568987	96568988	HoneydewSepia0187-MS-2	68	-
chr1	96921308	96921309	HoneydewSepia0236-MS-3	68	-
chr1	105633442	105633443	HoneydewSepia0236-MS-3	68	+
chr1	112965500	112965501	HoneydewSepia0187-MS-2	68	+
chr1	136789604	136789605	HoneydewSepia0187-MS-2	68	+	Ppp1r12b
chr1	142068250	142068251	HoneydewSepia0187-MS-2	68	-	Cfh	Cfh
chr1	142389256	142389257	HoneydewSepia0187-MS-2	68	+	Kcnt2	Kcnt2
chr1	148421647	148421648	HoneydewSepia0236-MS-3	68	+	Brinp3	Brinp3
chr1	149694783	149694784	HoneydewSepia0187-MS-2	68	+
chr1	150303529	150303530	HoneydewSepia0187-MS-2	68	+
chr1	160229037	160229038	HoneydewSepia0236-MS-3	68	-	Brinp2	Brinp2
chr1	178888448	178888449	HoneydewSepia0187-MS-2	68	+	Sdccag8	Sdccag8
chr10	11971088	11971089	HoneydewSepia0236-MS-2	68	-
chr11	4455022	4455023	HoneydewSepia0187-MS-2	68	-	Mtmr3	Mtmr3
chr11	19850496	19850497	HoneydewSepia0187-MS-2	68	-	Spred2
chr11	119271381	119271382	HoneydewSepia0187-MS-2	68	+
chr12	30304562	30304563	HoneydewSepia0187-MS-2	68	+	Myt1l	Myt1l
chr12	88072504	88072505	HoneydewSepia0236-MS-3	68	-
chr13	112239461	112239462	HoneydewSepia0187-MS-2	68	+	Gpbp1
chr14	94553690	94553691	HoneydewSepia0236-MS-2	68	-
chr15	8336828	8336829	HoneydewSepia0187-MS-2	68	+	Nipbl
chr15	58926988	58926989	HoneydewSepia0187-MS-2	68	+
chr15	73363250	73363251	HoneydewSepia0236-MS-3	68	+	Dennd3	Dennd3
chr16	21186470	21186471	HoneydewSepia0187-MS-2	68	+
chr17	53498576	53498577	HoneydewSepia0187-MS-2	68	+
chr18	31429396	31429397	HoneydewSepia0187-MS-2	68	+	Rit2
chr18	62620254	62620255	HoneydewSepia0187-MS-2	68	+	Htr4	Htr4
chr18	62956338	62956339	HoneydewSepia0187-MS-2	68	+
chr19	5262965	5262966	HoneydewSepia0187-MS-2	68	-	Pacs1	Pacs1
chr19	15266237	15266238	HoneydewSepia0187-MS-2	68	+
chr2	56387375	56387376	HoneydewSepia0187-MS-2	68	-
chr2	139941621	139941622	HoneydewSepia0236-MS-3	68	+
chr2	146069242	146069243	HoneydewSepia0236-MS-2	68	-	Ralgapa2	Ralgapa2
chr2	154982957	154982958	HoneydewSepia0236-MS-3	68	-	Itch
chr3	25564706	25564707	HoneydewSepia0236-MS-3	68	+	Nlgn1
chr3	80693815	80693816	HoneydewSepia0187-MS-2	68	-	Glrb	Glrb
chr3	119450415	119450416	HoneydewSepia0236-MS-2	68	-	Ptbp2	Ptbp2
chr3	127141960	127141961	HoneydewSepia0187-MS-2	68	+
chr3	134343837	134343838	HoneydewSepia0187-MS-2	68	-
chr4	6718732	6718733	HoneydewSepia0187-MS-2	68	+	Tox
chr4	46143866	46143867	HoneydewSepia0236-MS-3	68	-	Tstd2	Tstd2
chr4	59654124	59654125	HoneydewSepia0187-MS-2	68	+	E130308A19Rik	E130308A19Rik
chr4	97291824	97291825	HoneydewSepia0236-MS-2	68	-	Nfia
chr4	124921543	124921544	HoneydewSepia0236-MS-3	68	+
chr4	148220970	148220971	HoneydewSepia0187-MS-2	68	+	Casz1	Casz1
chr5	35890051	35890052	HoneydewSepia0236-MS-2	68	+
chr6	29267587	29267588	HoneydewSepia0187-MS-2	68	-
chr6	108027115	108027116	HoneydewSepia0236-MS-2	68	+	Setmar	Setmar
chr7	62174919	62174920	HoneydewSepia0187-MS-2	68	-	Luzp2
chr7	88940346	88940347	HoneydewSepia0236-MS-3	68	+	Btbd1
chr7	88970197	88970198	HoneydewSepia0236-MS-3	68	+	Btbd1
chr7	151670502	151670503	HoneydewSepia0187-MS-2	68	-	Ppfia1	Ppfia1
chr8	14358715	14358716	HoneydewSepia0236-MS-2	68	-	Dlgap2
chr8	82267459	82267460	HoneydewSepia0187-MS-2	68	+	Anapc10	Anapc10
chr9	38244727	38244728	HoneydewSepia0236-MS-3	68	-
chr9	47664187	47664188	HoneydewSepia0187-MS-2	68	+
chr9	65573964	65573965	HoneydewSepia0236-MS-3	68	-	Zfp609	Zfp609
chr9	70338690	70338691	HoneydewSepia0236-MS-3	68	-	Rnf111	Rnf111
chrX	12603558	12603559	HoneydewSepia0236-MS-2	68	-
chrX	17792069	17792070	HoneydewSepia0187-MS-2	68	-	Kdm6a
chrX	68471083	68471084	HoneydewSepia0236-MS-2	68	-	Mtm1
chrX	164123332	164123333	HoneydewSepia0187-MS-2	68	-	Frmpd4	Frmpd4
chrX	165574432	165574433	HoneydewSepia0236-MS-3	68	+	Arhgap6	Arhgap6
chr1	21543862	21543863	HoneydewSepia0236-MS-3	67	-	Kcnq5	Kcnq5
chr1	34113635	34113636	HoneydewSepia0236-MS-2	67	-	Dst
chr1	41919866	41919867	HoneydewSepia0236-MS-2	67	+
chr1	49553847	49553848	HoneydewSepia0236-MS-3	67	+
chr1	63133849	63133850	HoneydewSepia0236-MS-2	67	-	Ino80d	Ino80d
chr1	116483325	116483326	HoneydewSepia0187-MS-2	67	-
chr1	133123809	133123810	HoneydewSepia0236-MS-3	67	-	Rassf5	Rassf5
chr1	143901473	143901474	HoneydewSepia0236-MS-3	67	-
chr1	144026652	144026653	HoneydewSepia0187-MS-2	67	+
chr1	144794753	144794754	HoneydewSepia0236-MS-3	67	+
chr1	148936497	148936498	HoneydewSepia0236-MS-2	67	+
chr1	150292116	150292117	HoneydewSepia0187-MS-2	67	+
chr1	153341106	153341107	HoneydewSepia0236-MS-3	67	+	Rnf2
chr1	164923881	164923882	HoneydewSepia0236-MS-2	67	-
chr10	62239594	62239595	HoneydewSepia0236-MS-3	67	-	Ccar1	Ccar1
chr10	92457745	92457746	HoneydewSepia0187-MS-2	67	-
chr11	36447393	36447394	HoneydewSepia0187-MS-2	67	+	Tenm2
chr11	64920889	64920890	HoneydewSepia0187-MS-2	67	+	Arhgap44
chr12	11280592	11280593	HoneydewSepia0236-MS-3	67	+	Smc6	Smc6
chr12	98361963	98361964	HoneydewSepia0236-MS-3	67	-
chr13	9611367	9611368	HoneydewSepia0236-MS-3	67	+	Dip2c	Dip2c
chr13	84355472	84355473	HoneydewSepia0187-MS-2	67	+
chr14	14248598	14248599	HoneydewSepia0236-MS-2	67	+	Synpr	Synpr
chr14	84074912	84074913	HoneydewSepia0236-MS-3	67	+
chr14	104386681	104386682	HoneydewSepia0236-MS-3	67	-	4930432J09Rik	4930432J09Rik
chr15	10513347	10513348	HoneydewSepia0236-MS-3	67	-	Rai14	Rai14
chr15	12068944	12068945	HoneydewSepia0236-MS-2	67	+	Zfr	Zfr
chr16	75906910	75906911	HoneydewSepia0236-MS-3	67	-	Samsn1	Samsn1
chr17	21635815	21635816	HoneydewSepia0187-MS-2	67	-	Zfp53
chr17	71900903	71900904	HoneydewSepia0236-MS-2	67	+
chr18	31988960	31988961	HoneydewSepia0236-MS-3	67	+	Wdr33	Wdr33
chr18	41087374	41087375	HoneydewSepia0236-MS-3	67	-
chr18	59357878	59357879	HoneydewSepia0236-MS-3	67	+	Chsy3	Chsy3
chr18	64421014	64421015	HoneydewSepia0187-MS-2	67	+	St8sia3|St8sia3os	St8sia3
chr19	17423323	17423324	HoneydewSepia0236-MS-2	67	+	Gcnt1
chr19	28054310	28054311	HoneydewSepia0236-MS-2	67	+	Rfx3
chr19	48832671	48832672	HoneydewSepia0236-MS-3	67	+	Sorcs3	Sorcs3
chr2	8034914	8034915	HoneydewSepia0236-MS-3	67	-
chr2	29827877	29827878	HoneydewSepia0236-MS-2	67	-	Sptan1
chr2	41948760	41948761	HoneydewSepia0236-MS-3	67	-	Lrp1b	Lrp1b
chr2	63665057	63665058	HoneydewSepia0187-MS-2	67	+
chr2	95369391	95369392	HoneydewSepia0236-MS-2	67	-
chr2	158146294	158146295	HoneydewSepia0187-MS-2	67	-	Lbp
chr2	172833921	172833922	HoneydewSepia0236-MS-2	67	-	Rae1
chr4	5679797	5679798	HoneydewSepia0236-MS-3	67	-	Fam110b
chr4	32629344	32629345	HoneydewSepia0236-MS-3	67	-	Bach2
chr5	10695577	10695578	HoneydewSepia0236-MS-3	67	+
chr5	111853504	111853505	HoneydewSepia0187-MS-2	67	-	Mn1
chr6	13072521	13072522	HoneydewSepia0236-MS-3	67	-
chr6	17619398	17619399	HoneydewSepia0236-MS-3	67	+
chr6	30003245	30003246	HoneydewSepia0187-MS-2	67	+	Nrf1	Nrf1
chr6	66115724	66115725	HoneydewSepia0187-MS-2	67	-
chr6	86161131	86161132	HoneydewSepia0187-MS-2	67	-	Tgfa
chr6	86832451	86832452	HoneydewSepia0236-MS-3	67	-	Aak1
chr7	50441212	50441213	HoneydewSepia0236-MS-3	67	+	Zfp936	Zfp936
chr7	109333033	109333034	HoneydewSepia0187-MS-2	67	-	Nup98	Nup98
chr7	118891382	118891383	HoneydewSepia0236-MS-3	67	+	Galnt18
chr8	23393662	23393663	HoneydewSepia0187-MS-2	67	+
chr8	59846019	59846020	HoneydewSepia0187-MS-2	67	+
chr8	75102246	75102247	HoneydewSepia0236-MS-2	67	+	Tmem38a	Tmem38a
chr9	76679014	76679015	HoneydewSepia0187-MS-2	67	+
chr9	80098120	80098121	HoneydewSepia0187-MS-2	67	+	Myo6	Myo6
chr9	99539272	99539273	HoneydewSepia0187-MS-2	67	+	Dzip1l	Dzip1l
chrX	68671567	68671568	HoneydewSepia0236-MS-2	67	-	Mtmr1
chrX	110303253	110303254	HoneydewSepia0187-MS-2	67	-
chrX	133086343	133086344	HoneydewSepia0187-MS-2	67	+
chr1	26758478	26758479	HoneydewSepia0236-MS-3	66	+
chr1	27489366	27489367	HoneydewSepia0187-MS-2	66	-
chr1	30486802	30486803	HoneydewSepia0187-MS-2	66	+
chr1	74046707	74046708	HoneydewSepia0187-MS-2	66	-	Tns1	Tns1
chr1	82875052	82875053	HoneydewSepia0236-MS-3	66	+	Agfg1	Agfg1
chr1	84773914	84773915	HoneydewSepia0187-MS-2	66	+	Trip12
chr1	99612340	99612341	HoneydewSepia0187-MS-2	66	+	Ppip5k2
chr1	103592704	103592705	HoneydewSepia0236-MS-2	66	-
chr1	109507520	109507521	HoneydewSepia0236-MS-3	66	+
chr1	111174826	111174827	HoneydewSepia0187-MS-2	66	-
chr1	111316768	111316769	HoneydewSepia0187-MS-2	66	-
chr1	130096898	130096899	HoneydewSepia0236-MS-2	66	-	R3hdm1
chr1	142418275	142418276	HoneydewSepia0236-MS-2	66	-	Kcnt2
chr1	143022719	143022720	HoneydewSepia0236-MS-2	66	-
chr1	149152884	149152885	HoneydewSepia0187-MS-2	66	+
chr1	149841023	149841024	HoneydewSepia0236-MS-2	66	+
chr1	158251607	158251608	HoneydewSepia0236-MS-2	66	-	Nphs2
chr1	163175618	163175619	HoneydewSepia0187-MS-2	66	-	Prdx6	Prdx6
chr1	181693798	181693799	HoneydewSepia0187-MS-2	66	+	Ahctf1
chr1	181730148	181730149	HoneydewSepia0236-MS-2	66	-	Ahctf1	Ahctf1
chr1	182942352	182942353	HoneydewSepia0187-MS-2	66	+	Ephx1
chr1	190085428	190085429	HoneydewSepia0187-MS-2	66	-
chr10	13703621	13703622	HoneydewSepia0236-MS-2	66	+	Hivep2	Hivep2
chr10	106842942	106842943	HoneydewSepia0187-MS-2	66	-	Lin7a
chr11	4549995	4549996	HoneydewSepia0236-MS-2	66	-	Ascc2
chr11	77610778	77610779	HoneydewSepia0236-MS-2	66	+	Myo18a	Myo18a
chr11	94156930	94156931	HoneydewSepia0236-MS-2	66	-	Luc7l3	Luc7l3
chr11	115538365	115538366	HoneydewSepia0236-MS-3	66	-	Grb2	Grb2
chr12	16574174	16574175	HoneydewSepia0236-MS-2	66	-	Lpin1	Lpin1
chr12	73016244	73016245	HoneydewSepia0187-MS-2	66	-	Daam1
chr13	102470862	102470863	HoneydewSepia0187-MS-2	66	+	Pik3r1
chr14	26157513	26157514	HoneydewSepia0187-MS-2	66	-
[truncated: 22,443 more rows]

## Sheet: ST6
Chr	start	end	TumorID	reads	strand	gene(s)	gene_direction_activating
chr9	89869578	89869579	Fern0160-MS-3	12688	+	Rasgrf1	Rasgrf1
chr16	95514835	95514836	Fern0224-MS-2	9273	+	Kcnj15	Kcnj15
chr16	17945692	17945693	Fern0224-MS-2	7866	+
chr16	34411563	34411564	Fern0127-MS-1	7092	+	Kalrn
chr9	123116654	123116655	Fern0127-MS-1	6425	-	Cdcp1	Cdcp1
chr9	89869040	89869041	Soot0054-MS-2	6053	-	Rasgrf1
chr9	22656228	22656229	Soot0054-MS-2	5240	-	Bbs9
chr16	26662756	26662757	Fern0160-MS-3	5220	+	Il1rap	Il1rap
chr9	33670794	33670795	Fern0224-MS-2	5196	-
chr9	13315187	13315188	Tan0308-MS-7	4870	-
chr4	148396820	148396821	Fern0127-MS-1	4639	+	Pex14
chr14	22852612	22852613	Tan0308-MS-7	4547	-	1700112E06Rik
chr10	27809833	27809834	Fern0224-MS-2	4525	-	Ptprk
chr15	61976150	61976151	Tan0308-MS-7	4165	+	Pvt1	Pvt1
chr9	89864419	89864420	Tan0308-MS-7	3969	+	Rasgrf1	Rasgrf1
chr3	94235362	94235363	Tan0308-MS-7	3931	-	Tdrkh
chr15	3261198	3261199	Fern0127-MS-1	3915	-
chr9	89867524	89867525	Fern0224-MS-2	3291	+	Rasgrf1	Rasgrf1
chr19	4385607	4385608	Fern0160-MS-3	3119	+	Kdm2a
chr11	88349202	88349203	Fern0224-MS-2	3109	+	Msi2
chr14	105678918	105678919	Fern0120-MS-5	3066	-	Ndfip2
chr11	85319292	85319293	Tan0308-MS-7	3064	+	Bcas3	Bcas3
chr9	89867381	89867382	Fern0127-MS-1	3006	+	Rasgrf1	Rasgrf1
chr1	133614340	133614341	Tan0276-MS-1	2962	-
chr9	103215141	103215142	Tan0308-MS-7	2956	-	Topbp1
chr13	96323343	96323344	Fern0127-MS-1	2952	-
chr12	73883817	73883818	Fern0224-MS-2	2938	-	Ppm1a
chr7	120692303	120692304	Soot0054-MS-2	2919	-	Far1|Far1os	Far1os
chr7	133541882	133541883	Tan0276-MS-1	2872	+
chr9	96116533	96116534	Fern0160-MS-3	2868	-	Tfdp2
chr9	45888980	45888981	Fern0160-MS-3	2824	-	Sik3
chr9	92362288	92362289	Fern0160-MS-3	2758	-	Plscr4
chr4	53523970	53523971	Fern0224-MS-2	2749	-	Slc44a1
chr9	113042518	113042519	Tan0302-MS-2	2742	-
chr3	108451740	108451741	Fern0127-MS-1	2730	-
chr9	89224745	89224746	Fern0127-MS-1	2691	+
chr2	75761402	75761403	Tan0276-MS-1	2650	+	Agps	Agps
chr9	20811601	20811602	Fern0120-MS-5	2558	+	Mrpl4	Mrpl4
chr14	23535040	23535041	Tan0308-MS-7	2473	-	1700112E06Rik
chr11	77205307	77205308	Tan0276-MS-1	2456	-	Ssh2
chr8	11611274	11611275	Fern0224-MS-2	2452	+
chr7	5065947	5065948	Fern0127-MS-1	2344	+	Rfpl4
chr5	119166439	119166440	Fern0224-MS-2	2331	+	Med13l	Med13l
chr17	4982378	4982379	Tan0302-MS-2	2285	+
chr16	12138250	12138251	Tan0308-MS-7	2264	-	Shisa9
chr2	98506672	98506673	Fern0127-MS-1	2231	-
chr2	35488360	35488361	Fern0160-MS-3	2207	+	Dab2ip	Dab2ip
chr8	18851494	18851495	Fern0224-MS-2	2106	+	Agpat5	Agpat5
chr6	74600456	74600457	Tan0276-MS-1	2058	-
chr7	90250460	90250461	Fern0160-MS-3	2053	+
chr5	40683630	40683631	Fern0127-MS-1	2052	-
chr16	52147072	52147073	Fern0127-MS-1	2050	-	Cblb
chr9	23498529	23498530	Fern0127-MS-1	2031	-
chr13	59548881	59548882	Fern0160-MS-3	2001	-
chr6	15762240	15762241	Tan0276-MS-1	1999	-
chr9	86928235	86928236	Fern0127-MS-1	1995	+	Cyb5r4	Cyb5r4
chr1	66917850	66917851	Fern0224-MS-2	1972	-
chr2	146956870	146956871	Fern0160-MS-3	1964	-
chr2	14585273	14585274	Fern0127-MS-1	1945	+	Cacnb2	Cacnb2
chr2	35644299	35644300	Soot0054-MS-2	1929	-	Ttll11	Ttll11
chr12	25838037	25838038	Tan0276-MS-1	1903	-
chr19	11945832	11945833	Tan0276-MS-1	1877	-
chr9	99034786	99034787	Fern0120-MS-5	1819	+	Pik3cb
chr9	96395900	96395901	Fern0160-MS-3	1787	-
chr8	34908242	34908243	Tan0302-MS-2	1765	-	Rbpms	Rbpms
chr9	11868713	11868714	Tan0276-MS-1	1724	+
chr3	87048715	87048716	Fern0160-MS-3	1708	+
chr11	83905136	83905137	Fern0160-MS-3	1675	+	Tada2a
chr14	123702072	123702073	Fern0127-MS-1	1670	+	Nalcn
chr9	45982011	45982012	Fern0120-MS-5	1653	-	Sik3
chr7	102383880	102383881	Fern0120-MS-5	1648	-
chr9	74924367	74924368	Tan0302-MS-2	1647	-	Myo5a
chr10	43860246	43860247	Tan0276-MS-1	1629	-
chr1	99798683	99798684	Fern0224-MS-2	1611	-	Pam	Pam
chr5	91513362	91513363	Tan0302-MS-2	1608	-	Ereg
chr9	85907747	85907748	Tan0276-MS-1	1570	-
chr5	74721049	74721050	Fern0127-MS-1	1568	+	Scfd2
chr9	62694407	62694408	Tan0308-MS-7	1564	-	Cln6|Gm10653	Gm10653
chr1	141216115	141216116	Fern0127-MS-1	1544	+	Crb1
chr4	77070622	77070623	Tan0302-MS-2	1540	+	Ptprd
chr16	92233668	92233669	Fern0127-MS-1	1529	-
chr12	51097854	51097855	Fern0120-MS-5	1510	-
chr11	57501423	57501424	Tan0302-MS-2	1505	-	Galnt10
chr12	43192800	43192801	Fern0127-MS-1	1496	+
chr9	51880101	51880102	Soot0054-MS-2	1478	+	Rdx	Rdx
chr2	125082178	125082179	Fern0127-MS-1	1447	+	Dut	Dut
chr5	47604838	47604839	Tan0276-MS-1	1446	-
chr10	28861912	28861913	Tan0302-MS-2	1405	+
chrX	46365294	46365295	Tan0276-MS-1	1387	+	Enox2
chr9	21237215	21237216	Fern0224-MS-2	1385	+	Dnm2	Dnm2
chr5	49133733	49133734	Tan0302-MS-2	1384	-	Kcnip4	Kcnip4
chr5	69085433	69085434	Fern0120-MS-5	1384	+
chr17	63715330	63715331	Tan0282-MS-1	1367	-	Fbxl17	Fbxl17
chr5	89980796	89980797	Tan0302-MS-2	1364	-	Npffr2
chr8	110135306	110135307	Tan0302-MS-2	1360	-
chr11	120436571	120436572	Fern0120-MS-5	1347	+
chr18	35103412	35103413	Tan0308-MS-7	1345	-	Hspa9	Hspa9
chr5	34278086	34278087	Fern0120-MS-5	1337	-	Nelfa	Nelfa
chrX	129722548	129722549	Fern0127-MS-1	1312	+
chr13	94496205	94496206	Fern0120-MS-5	1308	+	Dmgdh	Dmgdh
chr14	25301401	25301402	Tan0308-MS-7	1302	+	Polr3a
chr11	80249682	80249683	Fern0120-MS-5	1295	-	Psmd11
chr3	67409847	67409848	Soot0054-MS-2	1289	+
chrX	126762607	126762608	Fern0127-MS-1	1285	+	Diap2	Diap2
chr2	73704414	73704415	Tan0276-MS-1	1282	+	Atf2
chr6	109545370	109545371	Tan0308-MS-7	1268	-
chr13	85407880	85407881	Tan0302-MS-2	1245	-	Rasa1	Rasa1
chr18	89793196	89793197	Fern0224-MS-2	1241	-	Dok6	Dok6
chr11	42320720	42320721	Tan0302-MS-2	1236	+	Gabrb2	Gabrb2
chr5	105889218	105889219	Tan0276-MS-1	1235	+	Lrrc8b	Lrrc8b
chr9	45766763	45766764	Tan0276-MS-1	1227	-
chr9	116070128	116070129	Fern0127-MS-1	1220	-	Tgfbr2	Tgfbr2
chr9	110477550	110477551	Tan0276-MS-1	1214	-	Setd2
chr9	21181544	21181545	Tan0308-MS-7	1194	+	Ilf3	Ilf3
chr11	108381414	108381415	Tan0276-MS-1	1186	+	Cep112	Cep112
chr19	58531288	58531289	Fern0224-MS-2	1178	+
chr4	90094225	90094226	Fern0224-MS-2	1178	-
chr9	52524152	52524153	Tan0276-MS-1	1167	-	Gm1715
chr6	134175686	134175687	Fern0224-MS-2	1144	+	Etv6	Etv6
chr8	24358400	24358401	Fern0224-MS-2	1125	+	Golga7
chr11	32254725	32254726	Fern0224-MS-2	1124	+	Sh3pxd2b	Sh3pxd2b
chr14	63312542	63312543	Tan0282-MS-1	1117	+	Ints6
chr2	102713056	102713057	Fern0224-MS-2	1111	-	Cd44	Cd44
chr12	106174564	106174565	Fern0224-MS-2	1101	+	Syne3
chr5	96523971	96523972	Tan0308-MS-7	1100	+	Cnot6l
chr9	8352384	8352385	Soot0054-MS-2	1095	-
chrX	129861566	129861567	Tan0276-MS-1	1091	+
chr19	55424783	55424784	Fern0120-MS-5	1087	+	Vti1a	Vti1a
chr9	102974408	102974409	Tan0282-MS-1	1087	-	Slco2a1
chr15	91429105	91429106	Tan0302-MS-2	1084	-
chr1	177335913	177335914	Tan0276-MS-1	1081	-	Rgs7	Rgs7
chr15	59192776	59192777	Fern0224-MS-2	1077	-	E430025E21Rik	E430025E21Rik
chrX	93367459	93367460	Tan0276-MS-1	1070	-
chr5	48679065	48679066	Tan0276-MS-1	1066	+	Slit2	Slit2
chr5	96792056	96792057	Fern0120-MS-5	1065	+
chr17	8572823	8572824	Tan0302-MS-2	1033	-	Gm16702|T2	Gm16702
chr9	118704723	118704724	Fern0224-MS-2	1029	+	Itga9	Itga9
chr2	59100085	59100086	Tan0302-MS-2	1022	+	Pkp4	Pkp4
chr10	82744923	82744924	Fern0120-MS-5	1017	+	Slc41a2
chr16	37873184	37873185	Fern0224-MS-2	1005	-	Lrrc58
chr16	58164423	58164424	Fern0224-MS-2	1002	+
chr12	110862783	110862784	Fern0120-MS-5	988	-	Rian
chr11	93940173	93940174	Soot0054-MS-2	980	-	Spag9
chr14	54643652	54643653	Fern0127-MS-1	966	-
chr2	61077744	61077745	Tan0302-MS-2	966	+
chr1	158763281	158763282	Tan0276-MS-1	962	+	Ralgps2
chr9	6211957	6211958	Tan0276-MS-1	960	-	Pdgfd
chr12	27009214	27009215	Tan0276-MS-1	954	-	Rnf144a	Rnf144a
chr15	36354703	36354704	Fern0224-MS-2	953	+
chr15	98649915	98649916	Fern0120-MS-5	946	-	Prkag1	Prkag1
chr12	31593089	31593090	Tan0282-MS-1	936	-	Acp1	Acp1
chr9	61742647	61742648	Tan0276-MS-1	935	+
chr1	11233574	11233575	Fern0120-MS-5	933	-	Prex2
chr14	102541674	102541675	Fern0160-MS-3	933	+
chrX	116836050	116836051	Tan0282-MS-1	930	-
chr1	43101666	43101667	Tan0302-MS-2	926	-
chr11	26833831	26833832	Tan0302-MS-2	923	+
chr7	94927368	94927369	Tan0282-MS-1	912	+	Grm5	Grm5
chr11	54381316	54381317	Tan0276-MS-1	896	+	Rapgef6	Rapgef6
chr6	146091337	146091338	Fern0120-MS-5	888	-	Itpr2	Itpr2
chr9	9225591	9225592	Fern0120-MS-5	888	+	Arhgap42
chr9	113056060	113056061	Tan0276-MS-1	878	-
chr15	72743579	72743580	Tan0302-MS-2	875	+	Trappc9
chrX	161797624	161797625	Tan0276-MS-1	874	+
chr5	130465716	130465717	Fern0120-MS-5	871	-	Gusb	Gusb
chr15	88647881	88647882	Tan0282-MS-1	864	+	Alg12
chr4	27485726	27485727	Tan0302-MS-2	860	-
chr4	119282311	119282312	Fern0120-MS-5	851	+	Foxj3	Foxj3
chr3	110236078	110236079	Fern0120-MS-5	850	+
chr12	69957441	69957442	Fern0224-MS-2	841	+
chr11	113605458	113605459	Fern0120-MS-5	838	-	Cdc42ep4	Cdc42ep4
chr2	125125304	125125305	Fern0224-MS-2	835	+
chr1	65212935	65212936	Fern0224-MS-2	834	-	Idh1	Idh1
chr5	123901252	123901253	Fern0224-MS-2	834	+	Mlxip	Mlxip
chr19	60398569	60398570	Fern0120-MS-5	831	-
chr14	65511312	65511313	Tan0173-MS-1	827	+	Hmbox1
chrX	35798009	35798010	Fern0224-MS-2	814	-	Lamp2	Lamp2
chr2	96337883	96337884	Tan0282-MS-1	811	-	Lrrc4c
chr11	40685227	40685228	Tan0302-MS-2	809	-
chr13	8660806	8660807	Fern0120-MS-5	802	+	Adarb2	Adarb2
chr17	26414949	26414950	Fern0224-MS-2	799	-	Luc7l
chr15	45123343	45123344	Tan0276-MS-1	796	-
chr12	81773891	81773892	Fern0160-MS-3	793	-	Slc39a9
chr15	8055635	8055636	Fern0120-MS-5	791	-
chr15	29188481	29188482	Tan0276-MS-1	790	-
chr4	88926802	88926803	Tan0302-MS-2	782	-	Cdkn2a	Cdkn2a
chr3	37304418	37304419	Fern0224-MS-2	777	+	Nudt6
chr17	42552080	42552081	Fern0224-MS-2	772	+	Ptchd4	Ptchd4
chr5	32152300	32152301	Fern0224-MS-2	772	+	Bre	Bre
chr16	49937177	49937178	Fern0224-MS-2	767	-
chr12	52922576	52922577	Fern0224-MS-2	763	+	Hectd1
chr1	144289172	144289173	Fern0224-MS-2	758	+
chr19	44189368	44189369	Fern0224-MS-2	758	-	Cwf19l1	Cwf19l1
chr11	105462847	105462848	Fern0224-MS-2	751	+	Tanc2	Tanc2
chr9	81590062	81590063	Fern0224-MS-2	751	-
chr5	22999906	22999907	Fern0224-MS-2	749	-	Kmt2e
chr11	78386028	78386029	Tan0276-MS-1	748	-	Nlk	Nlk
chr7	27170270	27170271	Fern0224-MS-2	746	+	Nlrp9c
chr1	62274047	62274048	Fern0224-MS-2	742	+	Pard3b	Pard3b
chr15	28591272	28591273	Fern0160-MS-3	741	+
chr9	114822671	114822672	Fern0224-MS-2	741	+	Gpd1l
chr16	90908942	90908943	Fern0224-MS-2	735	-
chr2	59459625	59459626	Fern0120-MS-5	733	-	Tanc1
chr10	34599573	34599574	Tan0302-MS-2	730	-
chr9	62665518	62665519	Fern0224-MS-2	726	-
chr5	77796268	77796269	Fern0224-MS-2	725	+	Igfbp7
chr12	91197885	91197886	Fern0224-MS-2	716	+	Nrxn3	Nrxn3
chr10	27810370	27810371	Fern0224-MS-2	712	-	Ptprk
chr5	3392894	3392895	Tan0276-MS-1	710	+	Cdk6	Cdk6
chr11	98383053	98383054	Fern0127-MS-1	707	+	Ikzf3
chr9	61922217	61922218	Fern0224-MS-2	707	-
chr4	119816701	119816702	Tan0282-MS-1	706	+
chr1	113635847	113635848	Fern0224-MS-2	705	-
chr6	56674392	56674393	Fern0224-MS-2	705	+	Avl9	Avl9
chr8	73942969	73942970	Fern0224-MS-2	705	+
chr5	54391169	54391170	Fern0224-MS-2	701	+	Stim2	Stim2
chr4	14594326	14594327	Fern0120-MS-5	697	+	Lrrc69
chr10	64828366	64828367	Fern0224-MS-2	695	+
chr2	164827225	164827226	Tan0302-MS-2	686	-	Ncoa5	Ncoa5
chr9	92651481	92651482	Fern0224-MS-2	678	-	4933400C23Rik
chr6	108750335	108750336	Fern0224-MS-2	676	+	Arl8b	Arl8b
chr17	69227379	69227380	Fern0224-MS-2	673	-
chr9	31199818	31199819	Fern0224-MS-2	672	+	Nfrkb	Nfrkb
chr13	60830386	60830387	Fern0224-MS-2	666	-	Dapk1
chr9	18352601	18352602	Fern0224-MS-2	653	+
chr1	124277398	124277399	Tan0282-MS-1	652	-
chr12	118734583	118734584	Fern0224-MS-2	648	+
chr7	129947302	129947303	Tan0173-MS-1	648	+
chr11	53695769	53695770	Fern0224-MS-2	647	-	Slc22a5	Slc22a5
chr14	111189875	111189876	Fern0120-MS-5	646	-
chr12	62185460	62185461	Fern0224-MS-2	645	-
chr9	11175145	11175146	Fern0224-MS-2	645	-
chr2	29255004	29255005	Fern0127-MS-1	643	+	Med27	Med27
chr16	45849381	45849382	Tan0282-MS-1	642	-
chr5	92504282	92504283	Fern0224-MS-2	640	+	G3bp2
chr16	71935465	71935466	Fern0120-MS-5	635	+
chr9	118034602	118034603	Tan0302-MS-2	633	-	Cmc1	Cmc1
chr9	85896630	85896631	Fern0120-MS-5	632	+
chr1	67685798	67685799	Fern0224-MS-2	628	+
chr6	120811092	120811093	Fern0224-MS-2	628	-	Bcl2l13
chr1	21030208	21030209	Fern0224-MS-2	627	-	Tram2	Tram2
chr8	54637847	54637848	Fern0224-MS-2	620	+
chr10	100793476	100793477	Fern0224-MS-2	616	+
chr1	193175669	193175670	Fern0224-MS-2	610	+	Tmem206	Tmem206
chr6	125421861	125421862	Fern0224-MS-2	610	-	Cd9	Cd9
chr9	46017152	46017153	Fern0224-MS-2	605	-	Sik3
chr8	66042777	66042778	Fern0224-MS-2	604	-
chrX	137326769	137326770	Tan0282-MS-1	602	-
chr4	108396058	108396059	Fern0224-MS-2	600	+	3110021N24Rik|Zfyve9	3110021N24Rik
chr8	127757356	127757357	Fern0224-MS-2	599	+	Disc1	Disc1
chr7	17315784	17315785	Fern0224-MS-2	595	-
chr10	95018891	95018892	Fern0224-MS-2	594	+	Nudt4
chr6	146424009	146424010	Fern0224-MS-2	594	+	Itpr2
chr4	141265478	141265479	Tan0282-MS-1	592	-	Ddi2	Ddi2
chr8	116704449	116704450	Fern0224-MS-2	590	+
chr17	19352353	19352354	Tan0282-MS-1	589	-
chrY	1001404	1001405	Fern0224-MS-2	585	+
chr5	45014438	45014439	Fern0224-MS-2	583	-	Ldb2	Ldb2
chr9	58487273	58487274	Fern0120-MS-5	582	-	Nptn
chr17	3143440	3143441	Fern0224-MS-2	579	-	Scaf8
chr4	141627013	141627014	Fern0224-MS-2	577	-	Tmem51	Tmem51
chr9	85200294	85200295	Fern0224-MS-2	577	+
chr14	49541030	49541031	Fern0224-MS-2	575	-
chr5	32109168	32109169	Fern0224-MS-2	575	-	Bre
chr6	30816496	30816497	Fern0224-MS-2	573	-	Copg2	Copg2
chr1	69893462	69893463	Fern0224-MS-2	571	+	Spag16	Spag16
chr7	117182769	117182770	Fern0160-MS-3	570	-	Ipo7
chr9	98482134	98482135	Fern0120-MS-5	570	+	Copb2	Copb2
chr3	115263467	115263468	Fern0224-MS-2	569	+
chr8	3259613	3259614	Fern0224-MS-2	569	+	Insr
chrX	46531167	46531168	Fern0224-MS-2	567	+	Enox2
chr9	9455611	9455612	Fern0224-MS-2	561	+
chr11	23916471	23916472	Fern0224-MS-2	560	-
chr19	58695478	58695479	Fern0224-MS-2	557	-	1810007D17Rik
chr6	32241535	32241536	Fern0224-MS-2	557	-	Plxna4	Plxna4
chr5	98723245	98723246	Fern0224-MS-2	556	+
chr12	93686177	93686178	Fern0224-MS-2	554	-
chr2	93090453	93090454	Fern0224-MS-2	554	-	Tspan18	Tspan18
chr3	125149363	125149364	Fern0127-MS-1	550	-	Ndst4
chr11	56138143	56138144	Fern0224-MS-2	547	+
chrX	113705347	113705348	Fern0224-MS-2	547	-
chr15	42908075	42908076	Fern0224-MS-2	546	+	Rspo2
chr9	93262783	93262784	Fern0224-MS-2	542	+
chr1	173377454	173377455	Fern0224-MS-2	539	-	F11r
chr12	74980777	74980778	Tan0276-MS-1	538	+
chrX	117749174	117749175	Fern0224-MS-2	538	-	Pcdh11x
chr1	40465840	40465841	Tan0302-MS-2	534	+
chr9	95421557	95421558	Fern0224-MS-2	525	-
chr9	119591518	119591519	Fern0224-MS-2	525	-	Scn10a	Scn10a
chr15	13258057	13258058	Fern0224-MS-2	524	+
chr9	91873468	91873469	Tan0282-MS-1	523	-
chr14	48880979	48880980	Fern0224-MS-2	520	-
chr13	98731738	98731739	Fern0224-MS-2	518	-	Arhgef28	Arhgef28
chr12	8760743	8760744	Fern0224-MS-2	512	+
chr5	64420844	64420845	Fern0120-MS-5	512	+
chr5	102227418	102227419	Fern0224-MS-2	512	-	Cds1
chr9	8770624	8770625	Tan0302-MS-2	512	+
chr9	74832586	74832587	Fern0224-MS-2	512	-	Fam214a
chr11	88500021	88500022	Tan0302-MS-2	511	-	Msi2	Msi2
chr9	104655546	104655547	Soot0054-MS-2	511	-	Cpne4
chr9	6896968	6896969	Fern0224-MS-2	506	+
chr3	103694926	103694927	Fern0224-MS-2	505	-	Ptpn22
chr5	93612637	93612638	Fern0224-MS-2	505	+	Ccni
chr10	5952256	5952257	Fern0224-MS-2	504	-
chr13	102463468	102463469	Fern0224-MS-2	504	-	Pik3r1	Pik3r1
chr9	118760411	118760412	Fern0224-MS-2	504	+	Itga9	Itga9
chr5	145113156	145113157	Tan0276-MS-1	503	+	Baiap2l1
chr12	8035161	8035162	Fern0224-MS-2	502	+
chr9	58439179	58439180	Fern0224-MS-2	499	+	Nptn	Nptn
chr6	27299785	27299786	Tan0276-MS-1	496	-	Grm8	Grm8
chr9	35420619	35420620	Fern0224-MS-2	493	-
chr1	159685921	159685922	Fern0224-MS-2	492	+
chr19	17681379	17681380	Fern0224-MS-2	492	+	Pcsk5
chr3	68313091	68313092	Fern0224-MS-2	489	+	Gm21949|Schip1	Gm21949|Schip1
chr8	88574967	88574968	Fern0224-MS-2	489	+	Phkb	Phkb
chr16	17181372	17181373	Fern0224-MS-2	488	-	Ube2l3	Ube2l3
chr5	86149898	86149899	Fern0224-MS-2	488	+
chr2	16449942	16449943	Fern0224-MS-2	487	+	Plxdc2	Plxdc2
chr1	13205300	13205301	Fern0224-MS-2	485	-	Ncoa2	Ncoa2
chr6	144619049	144619050	Fern0224-MS-2	483	-
chr1	159093479	159093480	Fern0120-MS-5	481	+	Rasal2
chr14	17552431	17552432	Fern0224-MS-2	480	+	Rarb
chr14	63634546	63634547	Fern0224-MS-2	480	-	Defb43
chr13	29046818	29046819	Fern0224-MS-2	478	-
chr19	27982344	27982345	Fern0224-MS-2	478	+	Rfx3
chr18	19241803	19241804	Fern0224-MS-2	477	+
chr1	52893204	52893205	Fern0224-MS-2	473	+
chr16	58740244	58740245	Fern0224-MS-2	471	-
chr13	34793381	34793382	Fern0224-MS-2	470	+
chr4	62690014	62690015	Fern0224-MS-2	469	+	Zfp618	Zfp618
chr5	30503162	30503163	Fern0224-MS-2	468	+	Hadhb	Hadhb
chr4	103255448	103255449	Fern0224-MS-2	465	-
chr13	25696891	25696892	Tan0302-MS-2	463	-
chr15	80753097	80753098	Tan0276-MS-1	463	-	Tnrc6b
chr16	30529868	30529869	Fern0224-MS-2	462	+	Tmem44
chr16	69176723	69176724	Fern0224-MS-2	462	+
chr11	39817278	39817279	Tan0302-MS-2	461	-
chr9	4504901	4504902	Fern0224-MS-2	461	-	Gria4	Gria4
chr11	39636100	39636101	Fern0224-MS-2	460	-
chr3	106881164	106881165	Fern0224-MS-2	459	+
chr9	28447215	28447216	Fern0224-MS-2	459	-	Opcml
chr7	59974328	59974329	Fern0127-MS-1	458	+
chr17	87524726	87524727	Fern0224-MS-2	451	+	Socs5	Socs5
chr19	57721123	57721124	Fern0224-MS-2	449	+	Atrnl1	Atrnl1
chr19	10823743	10823744	Fern0224-MS-2	445	-	A430093F15Rik
chr12	38762441	38762442	Fern0224-MS-2	442	+	Dgkb	Dgkb
chr8	56053783	56053784	Fern0224-MS-2	442	-	Gpm6a
chr13	7867012	7867013	Fern0224-MS-2	437	+
chr5	30491830	30491831	Fern0224-MS-2	436	+	Hadhb	Hadhb
chr10	73245419	73245420	Fern0120-MS-5	433	-
chr9	100857618	100857619	Fern0224-MS-2	429	+	Stag1	Stag1
chr6	39140137	39140138	Fern0224-MS-2	428	+	Kdm7a
chr4	72947261	72947262	Fern0224-MS-2	427	+
chr9	54074633	54074634	Fern0224-MS-2	426	-
chr12	6338379	6338380	Fern0224-MS-2	425	-
chr16	72167398	72167399	Tan0282-MS-1	425	-
chr2	80357766	80357767	Fern0224-MS-2	425	+	Nckap1
chr15	15313718	15313719	Tan0282-MS-1	424	-
chr18	62690716	62690717	Fern0224-MS-2	424	-	Fbxo38	Fbxo38
chr2	56119473	56119474	Fern0224-MS-2	423	+
chr5	145851160	145851161	Fern0120-MS-5	422	-	Arpc1a
chr8	69626954	69626955	Fern0224-MS-2	421	-
chr9	92199432	92199433	Fern0224-MS-2	421	-
chr16	57216923	57216924	Fern0224-MS-2	420	-	Tbc1d23	Tbc1d23
chr6	120835381	120835382	Fern0224-MS-2	420	+	Bcl2l13	Bcl2l13
chr9	13488136	13488137	Tan0173-MS-1	420	+	Maml2	Maml2
chr5	122923201	122923202	Fern0224-MS-2	419	-	Atp2a2	Atp2a2
chr8	129940713	129940714	Tan0173-MS-1	419	+	Pard3	Pard3
chr10	116560533	116560534	Fern0224-MS-2	418	-	Frs2	Frs2
chr12	63789778	63789779	Fern0224-MS-2	417	+
chr3	74923135	74923136	Fern0224-MS-2	416	+	Zbbx
chr1	7337836	7337837	Tan0282-MS-1	414	+
chr14	100400525	100400526	Fern0224-MS-2	414	-	Klf12	Klf12
chr15	12055021	12055022	Fern0224-MS-2	414	-	Zfr
chr3	66882576	66882577	Fern0224-MS-2	413	+	Rsrc1	Rsrc1
chr5	44163714	44163715	Fern0224-MS-2	413	+	Fbxl5
chr8	14656731	14656732	Fern0224-MS-2	412	+	Dlgap2	Dlgap2
chr11	79842237	79842238	Tan0173-MS-1	411	-	Suz12
chr15	93011297	93011298	Tan0282-MS-1	411	-
chr7	82700781	82700782	Tan0276-MS-1	411	+	Akap13	Akap13
chr12	4831770	4831771	Fern0224-MS-2	410	+	Sf3b6	Sf3b6
chr15	18122688	18122689	Tan0282-MS-1	410	+	4921515E04Rik
chr15	51813810	51813811	Fern0224-MS-2	408	+	Rad21
chr11	78553789	78553790	Fern0224-MS-2	407	+
chr11	88049777	88049778	Fern0224-MS-2	407	+
chr17	48772861	48772862	Fern0120-MS-5	407	-
chr9	28788246	28788247	Fern0224-MS-2	407	-
chr4	52814573	52814574	Tan0302-MS-2	404	+
chr19	42617148	42617149	Fern0224-MS-2	403	+	R3hcc1l	R3hcc1l
chr3	64052580	64052581	Fern0224-MS-2	402	+
chr9	15902353	15902354	Tan0282-MS-1	401	-	Fat3	Fat3
chr1	56569984	56569985	Fern0224-MS-2	398	+
chr9	42821977	42821978	Fern0224-MS-2	398	+	Arhgef12
chr14	66560038	66560039	Fern0224-MS-2	397	+	Scara3
chr2	24752547	24752548	Fern0224-MS-2	397	+	Ehmt1
chr2	48749999	48750000	Fern0224-MS-2	396	-	Acvr2a
chr8	90164066	90164067	Fern0224-MS-2	396	+	1700096P03Rik
chr4	37993282	37993283	Fern0224-MS-2	395	-
chr7	101891529	101891530	Fern0224-MS-2	395	+
chr1	3612768	3612769	Fern0224-MS-2	393	+	Xkr4
chr11	31528681	31528682	Fern0224-MS-2	392	-
chr1	97536792	97536793	Fern0224-MS-2	391	-	St8sia4	St8sia4
chr18	62967346	62967347	Fern0224-MS-2	391	+
chr9	31111201	31111202	Fern0224-MS-2	391	+
chr16	59069393	59069394	Fern0224-MS-2	390	-
chr9	9219722	9219723	Fern0224-MS-2	390	+	Arhgap42
chr12	33586106	33586107	Fern0224-MS-2	388	+
chr9	75354804	75354805	Fern0224-MS-2	388	+	Tmod3
chr4	140813478	140813479	Fern0224-MS-2	387	+
chr6	107590835	107590836	Fern0224-MS-2	386	+
chr9	116648333	116648334	Fern0224-MS-2	386	-	Rbms3	Rbms3
chr1	110687746	110687747	Tan0302-MS-2	385	+
chr9	35390577	35390578	Fern0224-MS-2	385	-
chr9	67515052	67515053	Fern0224-MS-2	384	+
chr4	34817611	34817612	Fern0224-MS-2	383	+	Zfp292
chr7	68474010	68474011	Tan0276-MS-1	383	-
chr8	70336207	70336208	Fern0224-MS-2	383	+	Psd3
chr1	134978197	134978198	Tan0308-MS-7	382	-	Pik3c2b
chr8	112930679	112930680	Tan0302-MS-2	382	-	Hydin
chr4	32960459	32960460	Fern0120-MS-5	381	+	Ankrd6
chr16	53988849	53988850	Tan0302-MS-2	377	-
chr18	76471483	76471484	Fern0224-MS-2	376	+
chr6	71233508	71233509	Fern0224-MS-2	376	+	Krcc1	Krcc1
chr6	116021949	116021950	Fern0224-MS-2	376	-	Tmcc1	Tmcc1
chr8	4300972	4300973	Fern0224-MS-2	374	-	Elavl1	Elavl1
chr8	32290535	32290536	Fern0224-MS-2	373	+
chr9	85765450	85765451	Tan0276-MS-1	373	+
chr13	19459240	19459241	Fern0224-MS-2	372	+	Stard3nl
chr17	78893642	78893643	Fern0224-MS-2	372	+
chr9	85602004	85602005	Fern0224-MS-2	371	+	Ibtk
chr2	7456839	7456840	Fern0224-MS-2	370	-
chr9	51752331	51752332	Fern0224-MS-2	369	-	Fdx1	Fdx1
chr9	90987194	90987195	Tan0282-MS-1	368	-
chr11	77261255	77261256	Fern0224-MS-2	367	-	Ssh2
chr4	59509605	59509606	Fern0224-MS-2	367	+	Ptbp3
chr5	96696212	96696213	Tan0173-MS-1	367	-
chr5	32260281	32260282	Fern0224-MS-2	366	-	Bre
chr15	81301735	81301736	Fern0224-MS-2	364	-	Rbx1
chr1	181706691	181706692	Fern0224-MS-2	363	+	Ahctf1
chr12	37695655	37695656	Fern0224-MS-2	363	-
chrX	127434634	127434635	Fern0224-MS-2	363	+
chr5	24950924	24950925	Fern0224-MS-2	361	-	Kmt2c	Kmt2c
chr7	60337975	60337976	Tan0173-MS-1	359	+
chr18	50094067	50094068	Fern0224-MS-2	358	-	Dmxl1
chr6	34932412	34932413	Fern0224-MS-2	358	+
chr18	54100138	54100139	Fern0224-MS-2	356	-	Csnk1g3
chr9	100380146	100380147	Fern0224-MS-2	355	-	Il20rb	Il20rb
chr13	67637658	67637659	Fern0224-MS-2	353	+
chr9	116969780	116969781	Fern0224-MS-2	353	+	Rbms3
chr17	35963469	35963470	Fern0224-MS-2	352	-	Flot1
chr6	61686419	61686420	Fern0120-MS-5	352	+	Ccser1	Ccser1
chr11	10769130	10769131	Fern0120-MS-5	351	+
chr19	26689796	26689797	Fern0120-MS-5	350	-	Smarca2
chr4	69991440	69991441	Fern0224-MS-2	350	-	Cdk5rap2	Cdk5rap2
chr18	66806164	66806165	Fern0224-MS-2	345	-
chr12	82630910	82630911	Tan0302-MS-2	344	-	Synj2bp	Synj2bp
chr18	20128905	20128906	Fern0224-MS-2	344	-	Dsc3	Dsc3
chr9	82863364	82863365	Fern0224-MS-2	344	-	Phip	Phip
chr12	104644977	104644978	Fern0224-MS-2	342	-
chr2	119060402	119060403	Fern0224-MS-2	342	-
chr4	48855705	48855706	Fern0224-MS-2	340	+
chr15	70764185	70764186	Tan0302-MS-2	339	+
chr7	135119522	135119523	Fern0224-MS-2	338	+	Fus	Fus
chr11	21186316	21186317	Fern0127-MS-1	337	-	Vps54
chr12	40393359	40393360	Fern0224-MS-2	337	+
chr5	96518376	96518377	Fern0224-MS-2	337	+	Cnot6l
chr14	25856095	25856096	Tan0173-MS-1	335	-
chr1	186619894	186619895	Fern0224-MS-2	334	+	2018-03-01
chr16	20061774	20061775	Fern0224-MS-2	332	-
chr3	28287200	28287201	Fern0224-MS-2	331	-	Tnik
chr17	19351533	19351534	Tan0282-MS-1	329	+
chr8	42304705	42304706	Fern0224-MS-2	329	+
chr3	28023891	28023892	Fern0224-MS-2	327	+	Pld1	Pld1
chr9	103209521	103209522	Fern0224-MS-2	327	+	Topbp1	Topbp1
chr6	39452864	39452865	Fern0224-MS-2	326	+	Dennd2a
chr1	64603114	64603115	Tan0282-MS-1	325	+	Creb1	Creb1
chr5	91624370	91624371	Fern0224-MS-2	325	-
chr9	17577522	17577523	Fern0224-MS-2	324	+
chr1	186030195	186030196	Fern0224-MS-2	323	-
chr16	60262503	60262504	Fern0224-MS-2	323	-	Epha6	Epha6
chr10	74741092	74741093	Fern0224-MS-2	322	+	Specc1l	Specc1l
chr14	60554800	60554801	Fern0224-MS-2	321	+	Atp8a2
chr11	64898267	64898268	Fern0224-MS-2	320	+	Arhgap44
chr14	15635327	15635328	Fern0127-MS-1	319	+
chr9	7038552	7038553	Tan0282-MS-1	314	-	Dync2h1	Dync2h1
chr2	78644988	78644989	Tan0282-MS-1	313	-
chr6	49211594	49211595	Fern0224-MS-2	313	+	Tra2a
chr6	103590250	103590251	Fern0224-MS-2	313	-	Chl1
chr1	60483130	60483131	Fern0120-MS-5	312	+	Abi2	Abi2
chr7	135337910	135337911	Fern0224-MS-2	312	+	4931431B13Rik|Itgad	Itgad
chr14	79664453	79664454	Fern0224-MS-2	310	+
chr9	80071732	80071733	Fern0224-MS-2	310	+	Myo6	Myo6
chr9	89867524	89867525	Tan0276-MS-1	310	+	Rasgrf1	Rasgrf1
chr3	151870300	151870301	Fern0224-MS-2	309	-	Dnajb4	Dnajb4
chr7	97930713	97930714	Fern0127-MS-1	309	-
chr9	20324275	20324276	Tan0173-MS-1	307	-	Zfp266	Zfp266
chr16	46492192	46492193	Tan0282-MS-1	306	-	Pvrl3	Pvrl3
chr16	46861664	46861665	Fern0224-MS-2	305	-
chr16	77039901	77039902	Fern0224-MS-2	305	+	Usp25	Usp25
chr8	105594896	105594897	Fern0224-MS-2	304	-
chr14	8740105	8740106	Tan0302-MS-2	302	-	Flnb
chr1	54873005	54873006	Fern0224-MS-2	301	-	Ankrd44	Ankrd44
chr11	93118562	93118563	Fern0224-MS-2	300	-	Car10
chr11	120838624	120838625	Tan0282-MS-1	298	-	Csnk1d	Csnk1d
chr7	28022201	28022202	Fern0224-MS-2	295	+	Adck4	Adck4
chr3	97569933	97569934	Tan0173-MS-1	292	-	Pde4dip	Pde4dip
chr3	148532861	148532862	Fern0224-MS-2	289	+	Adgrl2
chr4	71709374	71709375	Fern0224-MS-2	289	-
chr14	111751277	111751278	Fern0224-MS-2	287	+
chr9	51859808	51859809	Fern0224-MS-2	286	+	Rdx	Rdx
chr12	34305495	34305496	Fern0224-MS-2	285	+
chr9	48515054	48515055	Fern0224-MS-2	285	+	Zbtb16
chr9	16175704	16175705	Tan0282-MS-1	283	+	Fat3
chr1	129821562	129821563	Fern0224-MS-2	281	+	Rab3gap1	Rab3gap1
chr15	99955018	99955019	Fern0127-MS-1	281	-	Dip2b
chr3	29440510	29440511	Fern0120-MS-5	281	-	Egfem1
chr10	13530534	13530535	Fern0224-MS-2	280	-	Aig1	Aig1
chr9	36559858	36559859	Fern0224-MS-2	280	+	Stt3a
chr16	5476032	5476033	Tan0302-MS-2	279	-
chr17	43340175	43340176	Tan0282-MS-1	279	+
chr5	124097488	124097489	Fern0224-MS-2	278	+	Clip1
chr17	51830916	51830917	Tan0282-MS-1	277	-
chr4	71989261	71989262	Fern0224-MS-2	277	+
chr12	99213571	99213572	Fern0224-MS-2	273	-
chr16	57659344	57659345	Tan0173-MS-1	272	+	Col8a1
chr14	93074209	93074210	Fern0224-MS-2	270	+
chr16	44178234	44178235	Fern0120-MS-5	270	-	Gm608
chr18	64710102	64710103	Fern0224-MS-2	270	-	Atp8b1	Atp8b1
chr15	43115896	43115897	Fern0224-MS-2	269	+
chr9	36555696	36555697	Fern0224-MS-2	268	-	Stt3a	Stt3a
chr14	83410434	83410435	Fern0224-MS-2	267	-
chr6	120199318	120199319	Tan0302-MS-2	267	-	B4galnt3	B4galnt3
chr15	15386753	15386754	Tan0282-MS-1	263	+
chr3	28602835	28602836	Fern0120-MS-5	263	-	Slc2a2
chr16	67888264	67888265	Fern0224-MS-2	262	+
chr2	57859181	57859182	Fern0224-MS-2	260	+	Galnt5	Galnt5
chr12	83290150	83290151	Tan0282-MS-1	257	-	Sipa1l1
chr17	16328669	16328670	Fern0224-MS-2	254	+
chr15	26590271	26590272	Fern0224-MS-2	253	-	Fbxl7	Fbxl7
chr7	27185026	27185027	Fern0224-MS-2	253	+
chr6	18820061	18820062	Fern0120-MS-5	252	+	Ankrd7	Ankrd7
chr1	76331707	76331708	Fern0224-MS-2	251	-
chr9	77842115	77842116	Tan0173-MS-1	251	-
chr7	106572029	106572030	Tan0173-MS-1	250	-	Gdpd5
chr12	16067179	16067180	Tan0276-MS-1	245	-
chr16	49903619	49903620	Fern0224-MS-2	245	-	Cd47
chr8	109237324	109237325	Tan0302-MS-2	245	+	Tango6	Tango6
chr9	118907567	118907568	Fern0224-MS-2	245	-	Ctdspl
chr13	72906013	72906014	Tan0173-MS-1	242	+
chr9	47565253	47565254	Fern0120-MS-5	242	+	Cadm1	Cadm1
chr2	155996899	155996900	Tan0282-MS-1	240	-	Rbm39	Rbm39
chr14	35527392	35527393	Fern0224-MS-2	239	-	Wapal
chr9	31423153	31423154	Fern0224-MS-2	238	+
chr19	40324564	40324565	Fern0224-MS-2	237	+	Pdlim1
chr5	33093951	33093952	Fern0224-MS-2	237	+	Pisd
chr10	59193520	59193521	Fern0224-MS-2	236	+	Micu1	Micu1
chr16	68107324	68107325	Fern0224-MS-2	236	+
chr16	18470164	18470165	Fern0224-MS-2	235	-	Txnrd2
chr9	23156820	23156821	Fern0224-MS-2	234	+	Bmper	Bmper
chr14	29226671	29226672	Fern0224-MS-2	231	-	Erc2
chr8	92463894	92463895	Fern0224-MS-2	231	-
chr2	97134802	97134803	Fern0224-MS-2	230	+	Lrrc4c	Lrrc4c
chr10	111702185	111702186	Fern0120-MS-5	229	+
chr2	178580205	178580206	Fern0224-MS-2	229	+
chr6	51860394	51860395	Fern0224-MS-2	227	-	Skap2	Skap2
chrX	112508562	112508563	Fern0224-MS-2	226	-
chr1	139991150	139991151	Fern0224-MS-2	225	+	Ptprc
chr12	36800737	36800738	Fern0120-MS-5	225	-
chr9	45784432	45784433	Fern0224-MS-2	225	+	Pafah1b2
chr13	24104376	24104377	Fern0224-MS-2	224	+	Lrrc16a
chrX	111274959	111274960	Fern0224-MS-2	223	+
chr1	71078218	71078219	Fern0224-MS-2	220	+	Bard1
chr3	107923185	107923186	Fern0224-MS-2	220	+	Gnai3
chr5	143540946	143540947	Fern0224-MS-2	220	-	Tnrc18	Tnrc18
chr5	66460372	66460373	Fern0224-MS-2	219	-	Rbm47	Rbm47
chr3	19731651	19731652	Fern0224-MS-2	218	-
chr12	121219432	121219433	Fern0224-MS-2	215	-	Tmem196
chr1	13513598	13513599	Fern0224-MS-2	214	+
chr12	62133245	62133246	Fern0224-MS-2	214	+
chr9	85635653	85635654	Fern0120-MS-5	214	-	Ibtk	Ibtk
chrX	60168880	60168881	Fern0224-MS-2	212	-
chr12	53610223	53610224	Fern0224-MS-2	211	-
chr9	67550525	67550526	Fern0224-MS-2	211	-
chr8	51239378	51239379	Tan0308-MS-7	207	+
chr9	112642327	112642328	Fern0224-MS-2	207	-
chr12	110718058	110718059	Fern0224-MS-2	206	+
chr12	102128194	102128195	Fern0224-MS-2	203	-	Gpr68	Gpr68
chr18	25995099	25995100	Fern0224-MS-2	203	-
chr2	157845809	157845810	Tan0282-MS-1	203	+
chr6	70805332	70805333	Fern0224-MS-2	203	+	Eif2ak3	Eif2ak3
chr10	40000357	40000358	Fern0127-MS-1	202	+
chr11	17347385	17347386	Fern0224-MS-2	198	-
chr2	155280969	155280970	Fern0224-MS-2	196	+
chr3	83876535	83876536	Tan0173-MS-1	196	+
chr10	105678314	105678315	Tan0282-MS-1	195	+
chr14	61795822	61795823	Fern0224-MS-2	195	-	Sacs
chrX	60757340	60757341	Fern0224-MS-2	195	+
chr15	3200344	3200345	Fern0224-MS-2	194	+
chr7	149399675	149399676	Fern0224-MS-2	194	+
chr15	64171742	64171743	Fern0224-MS-2	192	-	Asap1	Asap1
chr16	43998998	43998999	Fern0224-MS-2	192	-	Gramd1c	Gramd1c
chr5	19474853	19474854	Fern0224-MS-2	190	+	Magi2	Magi2
chr13	73987225	73987226	Fern0224-MS-2	187	-
chr9	59474522	59474523	Fern0224-MS-2	187	+	Parp6	Parp6
chr9	99896982	99896983	Fern0224-MS-2	187	-
chr17	39432556	39432557	Tan0282-MS-1	186	+
chr1	164883906	164883907	Fern0224-MS-2	185	+
chr5	8344806	8344807	Fern0224-MS-2	185	+	Adam22
chr11	3077622	3077623	Tan0282-MS-1	184	+	Sfi1
chr8	108611621	108611622	Fern0224-MS-2	184	+	Nfatc3	Nfatc3
chr4	47372641	47372642	Fern0127-MS-1	182	-	Tgfbr1
chr2	156873111	156873112	Soot0054-MS-2	181	+	Soga1
chr18	49196105	49196106	Fern0224-MS-2	180	+
chr9	35010872	35010873	Tan0282-MS-1	179	+
chr9	57954758	57954759	Fern0224-MS-2	179	-	Ccdc33	Ccdc33
chr8	98246672	98246673	Fern0224-MS-2	178	-	Cnot1	Cnot1
chr9	44304673	44304674	Fern0224-MS-2	176	+
chr5	98404799	98404800	Fern0224-MS-2	175	-	Antxr2	Antxr2
chr9	89866332	89866333	Tan0282-MS-1	174	+	Rasgrf1	Rasgrf1
chr14	71092170	71092171	Fern0224-MS-2	173	-	Xpo7	Xpo7
chr9	66212632	66212633	Fern0224-MS-2	173	+	Herc1	Herc1
chr9	18110953	18110954	Fern0224-MS-2	171	+	Chordc1	Chordc1
chr9	87898481	87898482	Tan0282-MS-1	171	+
chr9	11506870	11506871	Fern0120-MS-5	170	+
chr12	78402707	78402708	Fern0224-MS-2	169	+	Fut8	Fut8
chr1	183135521	183135522	Tan0282-MS-1	168	+	Wdr26
chr9	32349204	32349205	Fern0224-MS-2	167	-
chr9	91527228	91527229	Tan0308-MS-7	167	+
chr11	54332132	54332133	Tan0282-MS-1	166	+
chr2	42092368	42092369	Fern0224-MS-2	166	-	Lrp1b	Lrp1b
chr5	98323681	98323682	Fern0224-MS-2	166	+	Antxr2
chr8	103033097	103033098	Fern0224-MS-2	166	-
chr16	74509326	74509327	Fern0224-MS-2	165	-
chr9	89513916	89513917	Fern0120-MS-5	165	-	AF529169	AF529169
chr14	9061198	9061199	Fern0224-MS-2	164	-	Acox2	Acox2
chr16	67722734	67722735	Fern0224-MS-2	164	+
chr6	128051552	128051553	Tan0308-MS-7	162	-	Tspan9	Tspan9
chr2	120634065	120634066	Fern0224-MS-2	159	+	Ttbk2
chr17	86356649	86356650	Fern0120-MS-5	157	-
chrX	34194954	34194955	Fern0224-MS-2	157	-
chrX	35612158	35612159	Fern0224-MS-2	157	-
chr14	62219526	62219527	Fern0224-MS-2	155	+	Trim13	Trim13
chr16	36000178	36000179	Fern0160-MS-3	155	+	Kpna1	Kpna1
chr17	91047139	91047140	Fern0224-MS-2	155	-	Nrxn1	Nrxn1
chr2	152082657	152082658	Fern0120-MS-5	155	-	Csnk2a1
chr9	101105398	101105399	Fern0224-MS-2	155	-	Ppp2r3a	Ppp2r3a
chr1	30550384	30550385	Fern0224-MS-2	154	-
chr10	45302054	45302055	Fern0224-MS-2	154	+	Hace1	Hace1
chr3	28101878	28101879	Fern0224-MS-2	154	+
chrX	134722119	134722120	Fern0224-MS-2	154	+	Il1rapl2	Il1rapl2
chr2	44043990	44043991	Tan0282-MS-1	153	-	Arhgap15
chr8	28259949	28259950	Fern0224-MS-2	153	-	4933416M07Rik|Rab11fip1	Rab11fip1
chr11	21543142	21543143	Tan0282-MS-1	152	-	Wdpcp
chr9	14138645	14138646	Tan0282-MS-1	151	-
chrX	39551599	39551600	Fern0224-MS-2	151	+	Stag2	Stag2
chr9	89284748	89284749	Fern0224-MS-2	150	+
chrX	138979803	138979804	Fern0224-MS-2	150	+
chr3	35821341	35821342	Fern0224-MS-2	149	-	Dcun1d1	Dcun1d1
chr9	48563401	48563402	Fern0224-MS-2	149	-	Zbtb16	Zbtb16
chr13	78095977	78095978	Fern0224-MS-2	148	-	Fam172a
chr4	116885175	116885176	Fern0224-MS-2	148	+
chr5	67611455	67611456	Fern0127-MS-1	147	-
chr4	90078090	90078091	Fern0127-MS-1	146	+
chr7	34948391	34948392	Fern0224-MS-2	146	+	Uba2
chr15	76331419	76331420	Fern0224-MS-2	145	+
chr13	15895412	15895413	Tan0173-MS-1	144	-
chr5	122911391	122911392	Fern0224-MS-2	144	+	Atp2a2
chrX	42990200	42990201	Fern0224-MS-2	142	+
chr5	44340470	44340471	Tan0282-MS-1	140	+
chr9	89869040	89869041	Fern0224-MS-2	140	+	Rasgrf1	Rasgrf1
chr17	12959981	12959982	Fern0224-MS-2	139	-	Airn|Igf2r	Igf2r
chr13	88560141	88560142	Fern0224-MS-2	138	-
chr2	80335180	80335181	Fern0224-MS-2	138	-
chr6	31100079	31100080	Fern0224-MS-2	138	-	Lincpint	Lincpint
chr15	76331415	76331416	Fern0224-MS-2	137	+
chr9	119277882	119277883	Fern0120-MS-5	137	+	Xylb	Xylb
chr3	29967661	29967662	Fern0224-MS-2	136	-
chr5	122849022	122849023	Fern0224-MS-2	136	-	Arpc3
chr13	97171534	97171535	Fern0224-MS-2	135	+	Poc5	Poc5
chr6	12165319	12165320	Tan0282-MS-1	134	-
chr7	35065336	35065337	Fern0224-MS-2	134	+	4931406P16Rik
chr11	53505987	53505988	Fern0224-MS-2	133	-	Rad50	Rad50
chr3	98849617	98849618	Tan0282-MS-1	133	-
chr5	34362520	34362521	Fern0224-MS-2	133	+	Poln
chr9	118190982	118190983	Fern0224-MS-2	133	+
chr18	73973844	73973845	Tan0173-MS-1	132	-	Me2	Me2
chr12	61011290	61011291	Fern0224-MS-2	131	-
chr5	141294052	141294053	Fern0224-MS-2	129	-	Gna12	Gna12
chr9	12260542	12260543	Tan0276-MS-1	129	-
chr11	17082342	17082343	Tan0276-MS-1	128	-	Ppp3r1
chr12	120884562	120884563	Fern0224-MS-2	128	+
chr3	37353895	37353896	Fern0224-MS-2	127	-	Spata5
chr2	146143703	146143704	Fern0224-MS-2	125	+	Ralgapa2
chr6	110357100	110357101	Fern0224-MS-2	125	-
chr1	155318588	155318589	Fern0224-MS-2	123	+	Dhx9
chr17	19598615	19598616	Fern0120-MS-5	123	-
chr1	172659956	172659957	Fern0224-MS-2	121	+	Atf6
chr13	14112312	14112313	Fern0224-MS-2	117	-	Tbce	Tbce
chr14	56802009	56802010	Fern0224-MS-2	117	-
chr12	61746249	61746250	Fern0224-MS-2	116	+
chr5	14880809	14880810	Fern0224-MS-2	116	+
chr6	55323887	55323888	Fern0224-MS-2	116	+
chr1	52131849	52131850	Fern0224-MS-2	115	+	Stat4	Stat4
chr19	44132681	44132682	Tan0302-MS-2	115	-	Erlin1	Erlin1
chr15	85931080	85931081	Fern0224-MS-2	114	-	Gramd4
chr3	75166821	75166822	Fern0120-MS-5	114	+
chr4	72818391	72818392	Fern0224-MS-2	114	-
chr9	116056133	116056134	Fern0120-MS-5	112	+	Tgfbr2
chr1	147008012	147008013	Fern0224-MS-2	111	-
chr12	59733061	59733062	Fern0224-MS-2	111	+
chrX	86594596	86594597	Fern0224-MS-2	111	-
chr18	42432028	42432029	Fern0224-MS-2	110	-
chr9	82842041	82842042	Fern0224-MS-2	110	-	Phip	Phip
chr10	15392030	15392031	Tan0282-MS-1	108	+
chr14	91293145	91293146	Fern0224-MS-2	108	+
chr16	66222584	66222585	Tan0276-MS-1	108	+
chr5	48646306	48646307	Fern0224-MS-2	108	-	Slit2
chr13	76327689	76327690	Tan0302-MS-2	107	-
chr4	144651412	144651413	Fern0224-MS-2	107	+	Vps13d
chr9	7557788	7557789	Fern0224-MS-2	107	-
chr8	85756847	85756848	Fern0224-MS-2	106	-	Tbc1d9
chr5	17492864	17492865	Fern0224-MS-2	104	-	Gnat3
chr5	127009253	127009254	Fern0224-MS-2	104	+
chr2	67580191	67580192	Tan0282-MS-1	103	+
chr6	10776307	10776308	Tan0173-MS-1	103	+
chr12	44744524	44744525	Fern0224-MS-2	102	-
chr4	132580031	132580032	Fern0224-MS-2	102	-	Ahdc1
chr2	89762801	89762802	Tan0282-MS-1	101	+
chr5	57420097	57420098	Fern0224-MS-2	101	+
chr8	116455484	116455485	Fern0224-MS-2	101	+
chr13	58930371	58930372	Fern0120-MS-5	99	-	Ntrk2
chr15	69341212	69341213	Tan0276-MS-1	98	-
chr8	75082290	75082291	Tan0282-MS-1	98	-
chr9	9204030	9204031	Fern0224-MS-2	98	-	Arhgap42	Arhgap42
chr8	95262951	95262952	Fern0224-MS-2	97	+
chr12	63145084	63145085	Fern0224-MS-2	96	+
chr7	34522777	34522778	Fern0224-MS-2	96	-	Scgb2b24	Scgb2b24
chr17	65246444	65246445	Tan0276-MS-1	95	-
chr16	18276240	18276241	Fern0224-MS-2	94	-	Dgcr8	Dgcr8
chrX	157894806	157894807	Fern0224-MS-2	93	+
chr3	7370133	7370134	Fern0127-MS-1	91	+	Pkia	Pkia
chr4	78096613	78096614	Fern0224-MS-2	91	+
chr6	80677977	80677978	Fern0224-MS-2	90	+	Lrrtm4	Lrrtm4
chr15	6617595	6617596	Fern0224-MS-2	89	-
chr11	106718775	106718776	Fern0120-MS-5	87	+	Smurf2
chr17	57612326	57612327	Tan0282-MS-1	87	+	Adgre1	Adgre1
chr3	77164187	77164188	Fern0224-MS-2	87	+
chr4	149807587	149807588	Fern0224-MS-2	87	-	Rere
chr6	127156492	127156493	Fern0224-MS-2	86	-	9330179D12Rik
chr11	105545213	105545214	Tan0173-MS-1	83	-	Tanc2
chr11	85286375	85286376	Fern0224-MS-2	82	-	Bcas3
chr15	13589773	13589774	Tan0282-MS-1	82	-
chr11	62177970	62177971	Tan0173-MS-1	81	+	Ncor1
chr14	59988508	59988509	Fern0224-MS-2	81	-
chr3	118388425	118388426	Fern0224-MS-2	81	+	Dpyd	Dpyd
chr6	8508708	8508709	Tan0173-MS-1	81	-	Glcci1
chr2	54670432	54670433	Tan0276-MS-1	80	-	Galnt13
chr6	119614335	119614336	Fern0224-MS-2	80	+	Erc1
chr7	35900619	35900620	Tan0282-MS-1	80	+
chr14	41286197	41286198	Fern0224-MS-2	76	-
chr7	5149091	5149092	Fern0224-MS-2	76	-
chr15	14702600	14702601	Tan0282-MS-1	75	+
chrX	46470101	46470102	Fern0224-MS-2	75	-	Enox2	Enox2
chr9	69745459	69745460	Fern0224-MS-2	74	-
chr11	84256906	84256907	Fern0224-MS-2	73	-	Aatf	Aatf
chr9	29360084	29360085	Fern0224-MS-2	73	+	Ntm
chr8	7785903	7785904	Fern0224-MS-2	72	-
chr14	76179044	76179045	Fern0224-MS-2	71	-	Slc25a30	Slc25a30
chr15	87352694	87352695	Fern0224-MS-2	71	-
chr12	76244545	76244546	Fern0224-MS-2	70	-	Kcnh5	Kcnh5
chr9	3448971	3448972	Tan0173-MS-1	70	+	Cwf19l2	Cwf19l2
chr9	28185348	28185349	Tan0173-MS-1	70	+	Opcml	Opcml
chr12	43605143	43605144	Fern0224-MS-2	69	+
chr9	116490646	116490647	Tan0282-MS-1	69	+	Rbms3
chr1	40717494	40717495	Fern0224-MS-2	68	+
chr6	50085547	50085548	Fern0224-MS-2	68	+	Mpp6	Mpp6
chr15	42117897	42117898	Fern0224-MS-2	67	-
chr9	75917830	75917831	Fern0224-MS-2	67	-	Hmgcll1
chr15	66997806	66997807	Fern0224-MS-2	66	+	St3gal1
chr5	148471142	148471143	Fern0224-MS-2	66	-	Flt1	Flt1
chr1	55521610	55521611	Fern0224-MS-2	65	-	Plcl1
chr9	7227128	7227129	Tan0308-MS-7	65	-
chr6	130344283	130344284	Fern0224-MS-2	64	+
chr9	49913458	49913459	Fern0224-MS-2	63	+
chr9	51752331	51752332	Tan0173-MS-1	63	-	Fdx1	Fdx1
chr10	13439712	13439713	Fern0224-MS-2	62	+	Aig1
chr3	74874122	74874123	Fern0224-MS-2	62	-	Zbbx	Zbbx
chr1	60995253	60995254	Fern0224-MS-2	59	+
chr4	121377316	121377317	Fern0224-MS-2	58	+
chr9	88032589	88032590	Tan0282-MS-1	57	-
chr6	89248334	89248335	Fern0120-MS-5	56	-
chr9	100598417	100598418	Fern0224-MS-2	56	-	Stag1
chr14	56640880	56640881	Fern0127-MS-1	55	-
chr8	108322303	108322304	Tan0302-MS-2	55	+	Ranbp10
chr13	116635287	116635288	Fern0224-MS-2	54	+
chr3	30216446	30216447	Fern0224-MS-2	54	-	Mecom	Mecom
chr6	143018414	143018415	Fern0224-MS-2	54	+	C2cd5
chr1	140535946	140535947	Fern0224-MS-2	52	+
chr5	82880060	82880061	Fern0224-MS-2	52	+
chr11	19140825	19140826	Tan0302-MS-2	50	+
chr16	75311712	75311713	Fern0224-MS-2	49	-
chr6	104228753	104228754	Fern0224-MS-2	48	+
chr1	52245123	52245124	Fern0224-MS-2	47	+	Gls
chr3	23907404	23907405	Fern0224-MS-2	47	+
chr5	87287796	87287797	Fern0224-MS-2	46	-
chr14	94564451	94564452	Fern0120-MS-5	45	+
chr9	105355772	105355773	Fern0224-MS-2	45	+	Atp2c1
chr13	82444554	82444555	Fern0224-MS-2	44	-
chr16	9374763	9374764	Fern0224-MS-2	44	-
chr19	32124122	32124123	Tan0173-MS-1	44	+	Asah2
chr9	119377200	119377201	Fern0224-MS-2	44	-
chr9	73516837	73516838	Tan0308-MS-7	43	-	Unc13c	Unc13c
chr10	102764795	102764796	Fern0224-MS-2	42	-
chr9	31818926	31818927	Fern0120-MS-5	42	+
chr3	82520381	82520382	Fern0224-MS-2	41	+
chr6	103366976	103366977	Fern0224-MS-2	41	-
chrX	35750094	35750095	Tan0282-MS-1	41	-
chr16	15739494	15739495	Tan0173-MS-1	38	+	Prkdc	Prkdc
chr19	9255926	9255927	Fern0224-MS-2	38	+
chr3	150658695	150658696	Tan0302-MS-2	38	+
chr12	47890470	47890471	Fern0224-MS-2	37	+	Nova1
chr9	75730971	75730972	Fern0224-MS-2	37	-	Bmp5
chr10	40098466	40098467	Fern0127-MS-1	36	+	Cdk19	Cdk19
chr18	5033649	5033650	Fern0224-MS-2	36	+
chr3	57722842	57722843	Fern0224-MS-2	36	+
chr1	149205206	149205207	Fern0224-MS-2	35	+
chr8	101560771	101560772	Tan0282-MS-1	35	-	Cdh8	Cdh8
chr9	86431255	86431256	Fern0224-MS-2	35	-	Dopey1
chr13	109435525	109435526	Fern0120-MS-5	34	+
chr2	8251849	8251850	Fern0224-MS-2	34	-
chr6	66346534	66346535	Fern0224-MS-2	34	-
chrX	49414133	49414134	Fern0224-MS-2	34	-	Gpc4	Gpc4
chr1	18367230	18367231	Fern0224-MS-2	32	+
chr2	11630530	11630531	Fern0160-MS-3	32	+	Il15ra	Il15ra
chr4	51786466	51786467	Tan0302-MS-2	32	-
chr8	26757913	26757914	Tan0282-MS-1	32	-	Whsc1l1
chr1	156698563	156698564	Fern0224-MS-2	31	+
chr3	90147429	90147430	Tan0302-MS-2	31	+	Gatad2b	Gatad2b
chr12	102639795	102639796	Fern0224-MS-2	30	+
chr1	147786222	147786223	Fern0224-MS-2	28	-
chr15	69341162	69341163	Tan0276-MS-1	28	-
chr13	40572479	40572480	Fern0224-MS-2	27	-
chr2	119732473	119732474	Fern0224-MS-2	27	+	Mga	Mga
chrX	59175178	59175179	Fern0224-MS-2	27	+
chr6	140532985	140532986	Fern0120-MS-5	25	+	Plekha5	Plekha5
chr12	15746141	15746142	Fern0224-MS-2	24	+
chr7	85979536	85979537	Tan0302-MS-2	24	-	Det1	Det1
chr12	119967493	119967494	Fern0224-MS-2	22	+
chr3	60424362	60424363	Fern0224-MS-2	22	+	Mbnl1	Mbnl1
chr3	80327379	80327380	Fern0160-MS-3	22	-
chr5	119302247	119302248	Fern0224-MS-2	22	-
chr9	66719230	66719231	Fern0224-MS-2	22	-	Rab8b	Rab8b
chr13	96842334	96842335	Tan0276-MS-1	21	-	Sv2c	Sv2c
chr6	28749268	28749269	Tan0308-MS-7	21	-	Snd1
chrX	129401354	129401355	Fern0127-MS-1	21	-
chr3	135347010	135347011	Fern0224-MS-2	20	+	Nfkb1
chr9	22235936	22235937	Fern0224-MS-2	20	+	9530077C05Rik	9530077C05Rik
chr3	144245946	144245947	Fern0224-MS-2	19	+	2018-09-15	2018-09-15
chr9	91302588	91302589	Tan0173-MS-1	19	-
chr12	59545723	59545724	Fern0224-MS-2	17	+
chr9	109852061	109852062	Fern0127-MS-1	17	-	Map4
chr10	94758645	94758646	Tan0282-MS-1	16	-	Cradd	Cradd
chr12	93446188	93446189	Fern0224-MS-2	16	+
chr2	58676519	58676520	Fern0224-MS-2	16	-	Ccdc148	Ccdc148
chr9	67804234	67804235	Fern0224-MS-2	16	+	Vps13c	Vps13c
chr1	56286943	56286944	Fern0224-MS-2	15	+
chr11	79878710	79878711	Tan0173-MS-1	15	-	Crlf3	Crlf3
chr12	74308902	74308903	Fern0127-MS-1	15	+	Mnat1	Mnat1
chr4	65501590	65501591	Tan0276-MS-1	15	+	Astn2
chr9	111031059	111031060	Fern0224-MS-2	15	-	Lrrfip2
chr1	113485332	113485333	Tan0173-MS-1	13	-
chr1	114572190	114572191	Fern0224-MS-2	13	-
chr10	4831089	4831090	Fern0224-MS-2	13	-	Syne1
chr2	48800726	48800727	Fern0224-MS-2	13	+	Orc4
chr4	126623899	126623900	Fern0224-MS-2	13	-	Zmym4	Zmym4
chr10	6785838	6785839	Fern0120-MS-5	12	-
chr12	45419236	45419237	Fern0224-MS-2	12	+
chr16	25731015	25731016	Fern0224-MS-2	12	+	Trp63	Trp63
chr9	24926590	24926591	Fern0120-MS-5	12	+	Herpud2
chr9	92062646	92062647	Fern0224-MS-2	12	+
chrX	105486696	105486697	Fern0224-MS-2	12	+
chr3	12980290	12980291	Fern0224-MS-2	11	+
chr3	115501274	115501275	Tan0276-MS-1	11	+
chr11	5727760	5727761	Fern0224-MS-2	10	-
chr7	24908225	24908226	Fern0224-MS-2	10	-	Zfp112
chr9	25745070	25745071	Fern0224-MS-2	10	+
chr9	78418822	78418823	Soot0054-MS-2	10	+	Slc17a5
chr1	88626671	88626672	Fern0224-MS-2	9	+	Dis3l2	Dis3l2
chr16	81833906	81833907	Fern0224-MS-2	9	+
chr17	41659477	41659478	Fern0224-MS-2	9	-
chr9	122247089	122247090	Fern0224-MS-2	9	+
chr18	60944219	60944220	Tan0276-MS-1	8	+
chr5	108935237	108935238	Fern0127-MS-1	8	-
chr8	25608227	25608228	Fern0224-MS-2	8	+
chr9	6288913	6288914	Tan0302-MS-2	8	-	Pdgfd
chr1	80269039	80269040	Fern0224-MS-2	7	-	Cul3	Cul3
chr2	4567776	4567777	Tan0276-MS-1	7	+	Prpf18
chr3	135296983	135296984	Fern0120-MS-5	7	-	Nfkb1	Nfkb1
chr11	63311050	63311051	Fern0224-MS-2	6	+
chr16	92737970	92737971	Fern0224-MS-2	6	+	Runx1
chr17	13113873	13113874	Tan0308-MS-7	6	+	Tcp1	Tcp1
chr19	42511015	42511016	Tan0302-MS-2	6	-
chr2	44731319	44731320	Fern0224-MS-2	6	-
chr9	88471532	88471533	Fern0224-MS-2	6	-
chr9	100092392	100092393	Fern0224-MS-2	6	-
chr19	4349015	4349016	Fern0160-MS-3	5	+	Kdm2a
chr3	84367416	84367417	Fern0224-MS-2	5	-	Arfip1	Arfip1
chr6	50415641	50415642	Fern0224-MS-2	5	+
chr9	96498883	96498884	Fern0160-MS-3	5	-	Rasa2	Rasa2
chr9	97787962	97787963	Fern0224-MS-2	5	-	Clstn2	Clstn2
chr1	87719635	87719636	Fern0120-MS-5	4	+	Cab39	Cab39
chr1	172931210	172931211	Fern0224-MS-2	4	+
chr12	3471904	3471905	Fern0224-MS-2	4	+	Asxl2	Asxl2
chr13	74727334	74727335	Fern0224-MS-2	4	+
chr15	98385440	98385441	Fern0224-MS-2	4	-	Ccnt1	Ccnt1
chr17	66351622	66351623	Fern0224-MS-2	4	+	Ankrd12
chr4	17805933	17805934	Fern0224-MS-2	4	+	Mmp16	Mmp16
chr9	58129026	58129027	Fern0224-MS-2	4	-
chr9	108689455	108689456	Fern0224-MS-2	4	-
chr1	156456188	156456189	Fern0224-MS-2	3	+	Cacna1e
chr10	64119758	64119759	Tan0282-MS-1	3	-	Ctnna3
chr16	84825767	84825768	Tan0308-MS-7	3	+	Jam2	Jam2
chr17	47622611	47622612	Fern0224-MS-2	3	-
chr2	79196426	79196427	Tan0276-MS-1	3	-	Cerkl	Cerkl
chr4	73941977	73941978	Tan0302-MS-2	3	+	Kdm4c	Kdm4c
chr5	10803968	10803969	Fern0224-MS-2	3	-
chr5	83689113	83689114	Fern0224-MS-2	3	+
chr6	11411142	11411143	Fern0224-MS-2	3	+
chr9	57168482	57168483	Fern0224-MS-2	3	-
chr9	74432063	74432064	Fern0224-MS-2	3	+
chr9	91492056	91492057	Fern0224-MS-2	3	-
chr1	14936102	14936103	Tan0282-MS-1	2	-
chr1	44288317	44288318	Fern0224-MS-2	2	-
chr11	96939279	96939280	Fern0160-MS-3	2	+
chr13	61976013	61976014	Fern0224-MS-2	2	+
chr14	32362243	32362244	Fern0120-MS-5	2	-	Colq	Colq
chr15	34900279	34900280	Fern0224-MS-2	2	+	Stk3
chr15	35276370	35276371	Fern0224-MS-2	2	+
chr15	44227888	44227889	Fern0224-MS-2	2	-	Nudcd1	Nudcd1
chr15	82099596	82099597	Tan0173-MS-1	2	-
chr17	22073513	22073514	Fern0224-MS-2	2	+	Zfp942
chr19	29468281	29468282	Fern0224-MS-2	2	-
chr2	29764914	29764915	Fern0224-MS-2	2	-	Odf2
chr3	4385568	4385569	Tan0276-MS-1	2	-
chr3	78206249	78206250	Fern0224-MS-2	2	-
chr5	35236329	35236330	Fern0160-MS-3	2	-	Htt
chr6	120811092	120811093	Tan0308-MS-7	2	-	Bcl2l13
chr8	47054204	47054205	Fern0224-MS-2	2	+	1700029J07Rik
chr9	11868713	11868714	Tan0308-MS-7	2	+
chr9	51466740	51466741	Fern0224-MS-2	2	-
chr9	70345336	70345337	Fern0224-MS-2	2	-	Rnf111	Rnf111
chr9	73226537	73226538	Tan0308-MS-7	2	+
chr9	118437170	118437171	Tan0173-MS-1	2	+	Golga4	Golga4
chrX	153282964	153282965	Fern0127-MS-1	2	-
chr1	34709821	34709822	Fern0224-MS-2	1	-
chr1	67685805	67685806	Fern0224-MS-2	1	+
chr1	75639523	75639524	Fern0127-MS-1	1	+
chr1	98844452	98844453	Fern0224-MS-2	1	+	Slco6b1
chr1	149755040	149755041	Fern0224-MS-2	1	-
chr1	150166809	150166810	Fern0160-MS-3	1	-
chr1	158763281	158763282	Tan0173-MS-1	1	-	Ralgps2	Ralgps2
chr1	167870942	167870943	Fern0224-MS-2	1	+	Pou2f1
chr10	28861912	28861913	Fern0224-MS-2	1	+
chr10	116001039	116001040	Fern0224-MS-2	1	+	Cnot2
chr11	19300166	19300167	Tan0302-MS-2	1	-
chr11	39817278	39817279	Fern0127-MS-1	1	-
chr11	42320720	42320721	Fern0224-MS-2	1	+	Gabrb2	Gabrb2
chr11	73446853	73446854	Fern0224-MS-2	1	-
chr11	79336343	79336344	Fern0224-MS-2	1	+	Evi2b|Gm21975|Nf1	Nf1
chr11	83905136	83905137	Fern0224-MS-2	1	+	Tada2a
chr11	88500021	88500022	Fern0160-MS-3	1	-	Msi2	Msi2
chr11	106561588	106561589	Fern0224-MS-2	1	-	Pecam1	Pecam1
chr12	21227531	21227532	Fern0224-MS-2	1	-	Asap2
chr12	40393359	40393360	Tan0276-MS-1	1	-
chr12	44320445	44320446	Fern0120-MS-5	1	+
chr12	52151979	52151980	Fern0224-MS-2	1	-	1700008C04Rik
chr12	61011290	61011291	Fern0127-MS-1	1	-
chr12	73913516	73913517	Tan0276-MS-1	1	+
chr13	8660806	8660807	Fern0224-MS-2	1	+	Adarb2	Adarb2
chr13	16573303	16573304	Fern0224-MS-2	1	-
chr13	24840070	24840071	Fern0224-MS-2	1	+
chr13	67527815	67527816	Fern0224-MS-2	1	+
chr13	85407880	85407881	Tan0282-MS-1	1	-	Rasa1	Rasa1
chr13	96323343	96323344	Fern0224-MS-2	1	-
chr14	28080887	28080888	Tan0302-MS-2	1	+	Arhgef3	Arhgef3
chr14	34244467	34244468	Fern0224-MS-2	1	-	Mapk8	Mapk8
chr14	38647980	38647981	Fern0224-MS-2	1	-
chr14	79788466	79788467	Tan0308-MS-7	1	+	Naa16
chr14	105678918	105678919	Fern0224-MS-2	1	-	Ndfip2
chr15	8108511	8108512	Fern0160-MS-3	1	-	Nup155
chr16	4180932	4180933	Fern0127-MS-1	1	+	Crebbp
chr16	4180932	4180933	Fern0224-MS-2	1	+	Crebbp
chr16	17945692	17945693	Tan0302-MS-2	1	+
chr16	17945692	17945693	Tan0282-MS-1	1	+
chr16	17945692	17945693	Fern0127-MS-1	1	+
chr16	17945692	17945693	Fern0160-MS-3	1	+
chr16	34411563	34411564	Fern0224-MS-2	1	+	Kalrn
chr16	57635653	57635654	Fern0224-MS-2	1	+	Col8a1
chr17	3375690	3375691	Fern0224-MS-2	1	+	Tiam2	Tiam2
chr17	34583553	34583554	Fern0120-MS-5	1	-	BC051142
chr17	42674293	42674294	Fern0224-MS-2	1	-
chr17	55066338	55066339	Tan0302-MS-2	1	+
chr17	61408646	61408647	Tan0282-MS-1	1	-
chr18	13425336	13425337	Fern0127-MS-1	1	-
chr18	48917463	48917464	Fern0224-MS-2	1	-
chr18	50094067	50094068	Fern0160-MS-3	1	-	Dmxl1
chr18	62967346	62967347	Soot0054-MS-2	1	+
chr19	46892659	46892660	Fern0224-MS-2	1	-	Cnnm2
chr2	33274764	33274765	Fern0224-MS-2	1	-	Zbtb34	Zbtb34
chr2	33611922	33611923	Soot0054-MS-2	1	+	Mvb12b
chr2	35488360	35488361	Fern0224-MS-2	1	+	Dab2ip	Dab2ip
chr2	44043990	44043991	Tan0308-MS-7	1	-	Arhgap15
chr2	125082178	125082179	Fern0224-MS-2	1	+	Dut	Dut
chr3	13998538	13998539	Fern0127-MS-1	1	-	Ralyl
chr3	31227707	31227708	Fern0127-MS-1	1	+
chr3	37304418	37304419	Tan0302-MS-2	1	+	Nudt6
chr3	107923185	107923186	Tan0308-MS-7	1	+	Gnai3
chr4	8478859	8478860	Tan0302-MS-2	1	-	Rab2a
chr4	34819043	34819044	Fern0224-MS-2	1	+	Zfp292
chr4	71709374	71709375	Tan0173-MS-1	1	-
chr5	24949578	24949579	Fern0160-MS-3	1	-	Kmt2c	Kmt2c
chr5	77796268	77796269	Fern0160-MS-3	1	+	Igfbp7
chr5	77796268	77796269	Tan0302-MS-2	1	+	Igfbp7
chr5	91224971	91224972	Fern0224-MS-2	1	+	Cxcl15	Cxcl15
chr5	91513362	91513363	Fern0224-MS-2	1	-	Ereg
chr5	96792056	96792057	Fern0224-MS-2	1	-
chr6	15762240	15762241	Fern0224-MS-2	1	-
chr6	31686408	31686409	Fern0224-MS-2	1	+
chr6	83317899	83317900	Fern0120-MS-5	1	-	Tet3	Tet3
chr7	17718964	17718965	Fern0127-MS-1	1	+
chr7	69092210	69092211	Tan0308-MS-7	1	-	A330076H08Rik	A330076H08Rik
chr7	78406383	78406384	Fern0224-MS-2	1	-
chr7	99200134	99200135	Fern0224-MS-2	1	-	Dlg2
chr7	112313365	112313366	Fern0224-MS-2	1	-
chr7	133541882	133541883	Fern0120-MS-5	1	+
chr8	3259613	3259614	Tan0282-MS-1	1	+	Insr
chr8	95262951	95262952	Fern0160-MS-3	1	+
chr8	115337209	115337210	Tan0282-MS-1	1	+	Cntnap4	Cntnap4
chr8	127757356	127757357	Tan0308-MS-7	1	-	Disc1
chr9	10842683	10842684	Fern0224-MS-2	1	+	Cntn5
chr9	48089110	48089111	Tan0282-MS-1	1	+
chr9	53919063	53919064	Tan0276-MS-1	1	+
chr9	89864419	89864420	Fern0120-MS-5	1	+	Rasgrf1	Rasgrf1
chr9	89869578	89869579	Tan0308-MS-7	1	+	Rasgrf1	Rasgrf1
chr9	89869578	89869579	Fern0224-MS-2	1	+	Rasgrf1	Rasgrf1
chr9	89869578	89869579	Fern0127-MS-1	1	+	Rasgrf1	Rasgrf1
chr9	90987194	90987195	Fern0224-MS-2	1	-
chr9	96116533	96116534	Tan0276-MS-1	1	-	Tfdp2
chr9	103924099	103924100	Fern0120-MS-5	1	-	Nphp3
chr9	104655546	104655547	Fern0127-MS-1	1	-	Cpne4
chr9	111606918	111606919	Tan0282-MS-1	1	+
chr9	116648333	116648334	Tan0276-MS-1	1	-	Rbms3	Rbms3
chr9	123116654	123116655	Fern0224-MS-2	1	-	Cdcp1	Cdcp1
chrX	40841228	40841229	Fern0224-MS-2	1	-
chrX	46365294	46365295	Fern0160-MS-3	1	+	Enox2
chrX	92962300	92962301	Fern0224-MS-2	1	-	Zc3h12b
chrX	106976422	106976423	Fern0224-MS-2	1	-
chrX	148694845	148694846	Fern0224-MS-2	1	+	Kdm5c	Kdm5c

## Sheet: ST7
Sample ID	Necorpsy ID	Genotype	Pathology	Specimen
Fern120-MS-5	756-09	SB-Onc3; P53 +/+	Lung, alveolar adenocarcinoma	Flash Frozen
Fern127-MS-1	385-09	SB-Onc3; P53 R172H/+	Lung, alveolar adenocarcinoma	Flash Frozen
Fern160-MS-3	968-09	SB-Onc3; P53 R172H/+	Lung, alveolar adenocarcinoma	Flash Frozen
Fern224-MS-2	1586-09	SB-Onc3; P53 +/+	Lung, alveolar adenocarcinoma	Flash Frozen
Soot54-MS-2	1261-09	SB-Onc3; P53 KO/+	Lung, alveolar adenocarcinoma	Flash Frozen
Tan173-MS-1	320-09	SB-Onc3; P53 KO/+	Lung, alveolar adenocarcinoma	Flash Frozen
Tan276-MS-1	429-09	SB-Onc3; P53 KO/+	Lung, alveolar adenocarcinoma	Flash Frozen
Tan282-MS-1	872-09	SB-Onc3; P53 KO/+	Lung, alveolar adenoma, large cell type	Flash Frozen
Tan302-MS-2	1095-09	SB-Onc3; P53 +/+	Lung, alveolar papillary adenocarcinoma	Flash Frozen
Tan308-MS-7	833-09	SB-Onc3; P53 KO/+	Lung, alveolar adenocarcinoma	Flash Frozen
Fern0304	1486-09	SB-Onc3; P53 R172H/+	Lung, alveolar adenocarcinoma	FFPE
Fern0168	1559-09	SB-Onc3; P53 +/+	Lung, alveolar adenoma	FFPE
Fern0182	574-09	SB-Onc3; P53 R172H/+	Lung, alveolar adenoma	FFPE
Fern0196	1350-09	SB-Onc3; P53 +/+	Lung, alveolar adenoma	FFPE
Fern0202	1351-09	SB-Onc3; P53 +/+	Lung, alveolar adenoma	FFPE
Fern0211	482-09	SB-Onc3; P53 R172H/+	Lung, alveolar adenocarcinoma	FFPE
Fern0282	09-872	SB-Onc3; P53 +/+	Lung, alveolar adenoma	FFPE
Fern0303	1093-09	SB-Onc3; P53 R172H/+	Lung, alveolar adenocarcinoma	FFPE
Fern0305	1797-09	SB-Onc3; P53 +/+	Lung, alveolar adenoma	FFPE
Fern0310	1744-09	SB-Onc3; P53 +/+	Lung, alveolar adenoma	FFPE
Fern0312	1352-09	SB-Onc3; P53 R172H/+	Lung, alveolar adenoma	FFPE
Fern0096	650-08	SB-Onc3; P53 R172H/+	Lung, alveolar adenocarcinoma	FFPE
Tan0261	09-598	SB-Onc3; P53 +/+	Lung, alveolar adenoma	FFPE
Tan0137	09-114	SB-Onc3; P53 KO/+	Lung, alveolar adenocarcinoma	FFPE
Tan0143	09-232	SB-Onc3; P53 KO/+	Lung, alveolar adenoma	FFPE
Tan0148	09-448	SB-Onc3; P53 +/+	Lung, alveolar adenoma	FFPE
Tan0276	09-429	SB-Onc3; P53 KO/+	Lung, alveolar adenocarcinoma	FFPE
Tan0302	09-1095	SB-Onc3; P53 +/+	Lung, alveolar adenoma	FFPE
Tan0308	09-833	SB-Onc3; P53 KO/+	Lung, alveolar adenocarcinoma	FFPE
Fern0079-MS-5	0041-09	SB-Onc3; P53 R172H/+	Liver, adenoma	Flash Frozen
Fern0085-MS-1	0040-09	SB-Onc3; P53 +/+	Liver, adenoma	Flash Frozen
Fern0094-MS-2	0060-09	SB-Onc3; P53 R172H/+	Liver, adenoma	Flash Frozen
Fern0107-MS-1	0140-09	SB-Onc3; P53 R172H/+	Liver, adenoma	Flash Frozen
Fern0108-MS-3	0434-09	SB-Onc3; P53 +/+	Liver, adenoma	Flash Frozen
Fern0108-MS-2	0434-09	SB-Onc3; P53 +/+	Liver, adenoma	Flash Frozen
Fern0114-MS-2	1142-09	SB-Onc3; P53 +/+	Liver, adenoma	Flash Frozen
Fern0114-MS-1	1142-09	SB-Onc3; P53 +/+	Liver, adenoma	Flash Frozen
Fern0114-MS-4	1142-09	SB-Onc3; P53 +/+	Liver, adenoma	Flash Frozen
Fern0114-MS-5	1142-09	SB-Onc3; P53 +/+	Liver, adenoma	Flash Frozen
Fern0120-MS-4	0756-10	SB-Onc3; P53 +/+	Liver, adenoma	Flash Frozen
Fern0120-MS-3	0756-10	SB-Onc3; P53 +/+	Liver, adenoma	Flash Frozen
Fern0120-MS-2	0756-10	SB-Onc3; P53 +/+	Liver, adenoma	Flash Frozen
Fern0120-MS-1	0756-10	SB-Onc3; P53 +/+	Liver, adenoma	Flash Frozen
Fern0140-MS-3	0751-09	SB-Onc3; P53 R172H/+	Liver, adenoma	Flash Frozen
Fern0140-MS-2	0751-09	SB-Onc3; P53 R172H/+	Liver, adenoma	Flash Frozen
Fern0140-MS-5	0751-09	SB-Onc3; P53 R172H/+	Liver, adenoma	Flash Frozen
Fern0140-MS-4	0751-09	SB-Onc3; P53 R172H/+	Liver, adenoma	Flash Frozen
Fern0140-MS-1	0751-09	SB-Onc3; P53 R172H/+	Liver, adenoma	Flash Frozen
Fern0141-MS-4	1033-09	SB-Onc3; P53 +/+	Liver, adenoma	Flash Frozen
Fern0141-MS-5	1033-09	SB-Onc3; P53 +/+	Liver, adenoma	Flash Frozen
Fern0141-MS-2	1033-09	SB-Onc3; P53 +/+	Liver, adenoma	Flash Frozen
Fern0141-MS-3	1033-09	SB-Onc3; P53 +/+	Liver, adenoma	Flash Frozen
Fern0141-MS-1	1033-09	SB-Onc3; P53 +/+	Liver, adenoma	Flash Frozen
Fern0153-MS-1	0994-09	SB-Onc3; P53 +/+	Liver, adenoma	Flash Frozen
Fern0158-MS-4	0794-09	SB-Onc3; P53 +/+	Liver, adenoma	Flash Frozen
Fern0158-MS-1	0794-09	SB-Onc3; P53 +/+	Liver, adenoma	Flash Frozen
Fern0158-MS-3	0794-09	SB-Onc3; P53 +/+	Liver, adenoma	Flash Frozen
Fern0158-MS-2	0794-09	SB-Onc3; P53 +/+	Liver, adenoma	Flash Frozen
Fern0160-MS-2	0968-09	SB-Onc3; P53 R172H/+	Liver, adenoma	Flash Frozen
Fern0160-MS-1	0968-09	SB-Onc3; P53 R172H/+	Liver, adenoma	Flash Frozen
Fern0168-MS-3	1559-09	SB-Onc3; P53 +/+	Liver, adenoma	Flash Frozen
Fern0168-MS-2	1559-09	SB-Onc3; P53 +/+	Liver, adenoma	Flash Frozen
Fern0168-MS-1	1559-09	SB-Onc3; P53 +/+	Liver, adenoma	Flash Frozen
Fern0171-MS-4	0536-09	SB-Onc3; P53 +/+	Liver, adenoma	Flash Frozen
Fern0178-MS-1	1209-09	SB-Onc3; P53 +/+	Liver, adenoma	Flash Frozen
Fern0179-MS-1	0717-09	SB-Onc3; P53 +/+	Liver, adenoma	Flash Frozen
Fern0192-MS-3	0971-09	SB-Onc3; P53 +/+	Liver, adenoma	Flash Frozen
Fern0196-MS-3	1350-09	SB-Onc3; P53 +/+	Liver, adenoma	Flash Frozen
Fern0199-MS-2	1000-09	SB-Onc3; P53 +/+	Liver, adenoma	Flash Frozen
Fern0199-MS-4	1000-09	SB-Onc3; P53 +/+	Liver, adenoma	Flash Frozen
Fern0199-MS-3	1000-09	SB-Onc3; P53 +/+	Liver, adenoma	Flash Frozen
Fern0214-MS-4	0967-09	SB-Onc3; P53 R172H/+	Liver, adenoma	Flash Frozen
Fern0214-MS-1	0967-09	SB-Onc3; P53 R172H/+	Liver, adenoma	Flash Frozen
Fern0214-MS-3	0967-09	SB-Onc3; P53 R172H/+	Liver, adenoma	Flash Frozen
Fern0214-MS-2	0967-09	SB-Onc3; P53 R172H/+	Liver, adenoma	Flash Frozen
Fern0305-MS-1	1797-09	SB-Onc3; P53 +/+	Liver, adenoma	Flash Frozen
Fern0312-MS-1	1352-09	SB-Onc3; P53 R172H/+	Liver, adenoma	Flash Frozen
Fern0312-MS-2	1352-09	SB-Onc3; P53 R172H/+	Liver, adenoma	Flash Frozen
Fern0312-MS-3	1352-09	SB-Onc3; P53 R172H/+	Liver, adenoma	Flash Frozen
Fern0312-MS-4	1352-09	SB-Onc3; P53 R172H/+	Liver, adenoma	Flash Frozen
Fern0319-LV	1585-09	SB-Onc3; P53 R172H/+	Liver, adenoma	Flash Frozen
Tan0099-MS-5	0507-09	SB-Onc3; P53 +/+	Liver, adenoma	Flash Frozen
Tan0099-MS-4	0507-09	SB-Onc3; P53 +/+	Liver, adenoma	Flash Frozen
Tan0099-MS-2	0507-09	SB-Onc3; P53 +/+	Liver, adenoma	Flash Frozen
Tan0107-MS-10	0929-09	SB-Onc3; P53 +/+	Liver, adenoma	Flash Frozen
Tan0107-MS-7	0929-09	SB-Onc3; P53 +/+	Liver, adenoma	Flash Frozen
Tan0107-MS-6	0929-09	SB-Onc3; P53 +/+	Liver, adenoma	Flash Frozen
Tan0107-MS-5	0929-09	SB-Onc3; P53 +/+	Liver, adenoma	Flash Frozen
Tan0107-MS-4	0929-09	SB-Onc3; P53 +/+	Liver, adenoma	Flash Frozen
Tan0107-MS-3	0929-09	SB-Onc3; P53 +/+	Liver, adenoma	Flash Frozen
Tan0107-MS-2	0929-09	SB-Onc3; P53 +/+	Liver, adenoma	Flash Frozen
Tan0107-MS-9	0929-09	SB-Onc3; P53 +/+	Liver, adenoma	Flash Frozen
Tan0107-MS-8	0929-09	SB-Onc3; P53 +/+	Liver, adenoma	Flash Frozen
Tan0119-MS-1	0319-09	SB-Onc3; P53 +/+	Liver, adenoma	Flash Frozen
Tan0123-MS-2	0251-09	SB-Onc3; P53 KO/+	Liver, adenoma	Flash Frozen
Tan0125-MS-1	0180-09	SB-Onc3; P53 KO/+	Liver, adenoma	Flash Frozen
Tan0148-MS-2	0448-09	SB-Onc3; P53 +/+	Liver, adenoma	Flash Frozen
Tan0148-MS-3	0448-09	SB-Onc3; P53 +/+	Liver, adenoma	Flash Frozen
Tan0150-MS-2	0582-09	SB-Onc3; P53 +/+	Liver, adenoma	Flash Frozen
Tan0150-MS-1	0582-09	SB-Onc3; P53 +/+	Liver, adenoma	Flash Frozen
Tan0170-MS-2	1125-09	SB-Onc3; P53 +/+	Liver, adenoma	Flash Frozen
Tan0171-MS-1	0871-09	SB-Onc3; P53 +/+	Liver, adenoma	Flash Frozen
Tan0180-MS-3	0250-09	SB-Onc3; P53 +/+	Liver, adenoma	Flash Frozen
Tan0180-MS-4	0250-09	SB-Onc3; P53 +/+	Liver, adenoma	Flash Frozen
Tan0185-MS-5	0601-09	SB-Onc3; P53 +/+	Liver, adenoma	Flash Frozen
Tan0185-MS-10	0601-09	SB-Onc3; P53 +/+	Liver, adenoma	Flash Frozen
Tan0185-MS-8	0601-09	SB-Onc3; P53 +/+	Liver, adenoma	Flash Frozen
Tan0185-MS-9	0601-09	SB-Onc3; P53 +/+	Liver, adenoma	Flash Frozen
Tan0185-MS-4	0601-09	SB-Onc3; P53 +/+	Liver, adenoma	Flash Frozen
Tan0185-MS-6	0601-09	SB-Onc3; P53 +/+	Liver, adenoma	Flash Frozen
Tan0185-MS-7	0601-09	SB-Onc3; P53 +/+	Liver, adenoma	Flash Frozen
Tan0185-MS-2	0601-09	SB-Onc3; P53 +/+	Liver, adenoma	Flash Frozen
Tan0185-MS-3	0601-09	SB-Onc3; P53 +/+	Liver, adenoma	Flash Frozen
Tan0189-MS-1	0664-09	SB-Onc3; P53 +/+	Liver, adenoma	Flash Frozen
Tan0206-MS-4	0381-09	SB-Onc3; P53 KO/+	Liver, adenoma	Flash Frozen
Tan0215-MS-3	0817-09	SB-Onc3; P53 +/+	Liver, adenoma	Flash Frozen
Tan0215-MS-2	0817-09	SB-Onc3; P53 +/+	Liver, adenoma	Flash Frozen
Tan0216-MS-1	0855-09	SB-Onc3; P53 KO/+	Liver, adenoma	Flash Frozen
Tan0265-MS-2	0855-09	SB-Onc3; P53 KO/+	Liver, adenoma	Flash Frozen
Tan0280-MS-6	1497-09	SB-Onc3; P53 +/+	Liver, adenoma	Flash Frozen
Tan0280-MS-5	1497-09	SB-Onc3; P53 +/+	Liver, adenoma	Flash Frozen
Tan0308-MS-4	0833-09	SB-Onc3; P53 KO/+	Liver, adenoma	Flash Frozen
Tan0308-MS-5	0833-09	SB-Onc3; P53 KO/+	Liver, adenoma	Flash Frozen
Tan0308-MS-3	0833-09	SB-Onc3; P53 KO/+	Liver, adenoma	Flash Frozen

## Sheet: ST8
start	end	TumorID	reads	strand	gene(s)	gene_direction_activating
113042520	113042521	1095-09	1633	-
115373801	115373802	09-448	1431	+
61976152	61976153	833-09	879	+	Pvt1	Pvt1
22852612	22852613	833-09	848	-	1700112E06Rik
89867381	89867382	385-09	747	+	Rasgrf1	Rasgrf1
89867524	89867525	429-09	515	+	Rasgrf1	Rasgrf1
58780859	58780860	1261-09	510	+	Cflar	Cflar
89869578	89869579	968-09	493	+	Rasgrf1	Rasgrf1
103215141	103215142	833-09	478	-	Topbp1
9225591	9225592	756-09	456	+	Arhgap42
110862783	110862784	756-09	439	-	Rian
4982378	4982379	1095-09	390	+
17945692	17945693	1586-09	340	+
89867524	89867525	1586-09	301	+	Rasgrf1	Rasgrf1
90124452	90124453	320-09	282	-	Tbc1d2b	Tbc1d2b
33670794	33670795	1586-09	263	-
4700559	4700560	1486-09	246	+	Nf2
95514835	95514836	1586-09	235	+	Kcnj15	Kcnj15
89867937	89867938	320-09	224	+	Rasgrf1	Rasgrf1
45982013	45982014	756-09	221	-	Sik3
99955018	99955019	385-09	212	-	Dip2b
28496494	28496495	1744-09	207	+	En2	En2
70596075	70596076	320-09	206	-	Adam10
96116533	96116534	968-09	180	-	Tfdp2
73198882	73198883	320-09	177	+	Ptk2
88345190	88345191	1351-09	171	-	Syncrip	Syncrip
96498883	96498884	968-09	162	-	Rasa2	Rasa2
109114416	109114417	429-09	157	-	Rgs9	Rgs9
94743386	94743387	09-833	144	-	Gpc1
119277882	119277883	756-09	135	+	Xylb	Xylb
49232586	49232587	09-833	134	+	Wnk2
133541886	133541887	429-09	126	+
25301401	25301402	833-09	108	+	Polr3a
66917850	66917851	1586-09	107	-
148396820	148396821	385-09	101	+	Pex14
116056133	116056134	756-09	96	+	Tgfbr2
16716340	16716341	320-09	96	+	Vps13a
11630530	11630531	968-09	90	+	Il15ra	Il15ra
44182278	44182279	1093-09	87	-	Gm608
21434014	21434015	09-833	87	+	Smarca4	Smarca4
26689798	26689799	756-09	83	-	Smarca2
4349021	4349022	968-09	81	+	Kdm2a
74850615	74850616	09-833	77	+	Fam214a	Fam214a
24926590	24926591	756-09	74	+	Herpud2
120303431	120303432	429-09	71	+	Clasp1	Clasp1
60270261	60270262	385-09	71	-	Nbeal1
19300166	19300167	1095-09	69	-
123116654	123116655	385-09	64	-	Cdcp1	Cdcp1
63393079	63393080	1095-09	63	+	2010111I01Rik|Gm16907	2010111I01Rik
98482136	98482137	756-09	63	+	Copb2	Copb2
109237324	109237325	1095-09	59	+	Tango6	Tango6
44678253	44678254	429-09	57	-	Ebf1
49211523	49211524	1586-09	54	+
108449137	108449138	482-09	53	-	Qrich1
24985553	24985554	1095-09	51	-
34411563	34411564	385-09	50	+	Kalrn
77205307	77205308	429-09	50	-	Ssh2
85407880	85407881	1095-09	46	-	Rasa1	Rasa1
88349202	88349203	1586-09	45	+	Msi2
66143120	66143121	833-09	45	+	Ppp4r1	Ppp4r1
28602837	28602838	756-09	44	-	Slc2a2
32282754	32282755	09-1095	44	-
175161336	175161337	1095-09	43	+
34873988	34873989	1095-09	43	+	Hc
115916689	115916690	1095-09	42	-
49937177	49937178	1586-09	42	-
134167170	134167171	385-09	41	-	Man1c1	Man1c1
109435525	109435526	756-09	41	+
89515172	89515173	756-09	39	-	AF529169	AF529169
177323048	177323049	650-08	39	-	Rgs7	Rgs7
133614340	133614341	429-09	39	-
149902118	149902119	429-09	39	+
61077748	61077749	1095-09	37	+
159321624	159321625	968-09	36	+	Syap1
129413384	129413385	968-09	35	-	Khdrbs1	Khdrbs1
12434498	12434499	429-09	34	-
20385135	20385136	833-09	33	+	Elmo1	Elmo1
27117437	27117438	833-09	33	+	Nceh1	Nceh1
91269875	91269876	09-429	32	+	Abhd17c
28496609	28496610	1093-09	32	-	En2
135924151	135924152	1586-09	32	-
119166439	119166440	1586-09	32	+	Med13l	Med13l
76918766	76918767	320-09	31	-	Ccdc141	Ccdc141
108743172	108743173	1350-09	31	-
105678918	105678919	756-09	30	-	Ndfip2
89394296	89394297	429-09	30	+
71579950	71579951	756-09	29	+	Cgnl1
54383508	54383509	429-09	29	-	Rapgef6
58304911	58304912	09-429	29	-
58375818	58375819	756-09	28	+	Acvr1
26484603	26484604	429-09	28	-	Zmiz1
5052848	5052849	1586-09	28	+
127304376	127304377	09-833	27	+	Kcnip3
41615575	41615576	1095-09	27	+
29188485	29188486	429-09	27	-
110236078	110236079	756-09	27	+
3761129	3761130	1486-09	26	-	Dtnb
87990396	87990397	1093-09	26	-	Focad
110410978	110410979	756-09	26	-	Pde4d
27772056	27772057	1486-09	26	-	Trio	Trio
84039461	84039462	1261-09	26	-
125693774	125693775	09-1095	25	-
35241488	35241489	1095-09	25	+	Slc13a4
86346150	86346151	1095-09	25	-	Ylpm1
69260972	69260973	429-09	24	-	Adam28	Adam28
21144079	21144080	385-09	24	-	Slc44a2
94345315	94345316	429-09	24	-
150564434	150564435	429-09	23	+
83012018	83012019	429-09	23	+	A230046K03Rik	A230046K03Rik
81005208	81005209	1095-09	23	+	Atp9b
44159414	44159415	1095-09	23	+	Chuk
93800414	93800415	320-09	23	+
71612090	71612091	1486-09	23	+
24901930	24901931	429-09	23	-
42308970	42308971	756-09	23	-
111764364	111764365	1095-09	23	+
65177800	65177801	1095-09	22	+	Clpx	Clpx
44683052	44683053	756-09	22	+	Kmt2a
136373016	136373017	429-09	22	-	Morc4	Morc4
61524491	61524492	429-09	22	-
28445524	28445525	574-09	22	+
68005579	68005580	1095-09	22	-
100477491	100477492	429-09	21	+	Enoph1	Enoph1
108707634	108707635	756-09	21	+	Ip6k2	Ip6k2
77142804	77142805	1095-09	21	+	Mlip
7153240	7153241	320-09	21	-	Pcmtd1
72783636	72783637	1095-09	21	+	Sp3
97388801	97388802	09-448	21	-
40000357	40000358	385-09	21	+
15935139	15935140	429-09	21	-
24592668	24592669	1486-09	20	+	Prkag2
121501539	121501540	429-09	20	+	Abcd3
166751620	166751621	1586-09	20	+	Cse1l	Cse1l
28496609	28496610	09-1095	20	-	En2
99648361	99648362	429-09	20	-	Rasgef1b	Rasgef1b
133323258	133323259	429-09	20	+	Srgap2
98995227	98995228	1586-09	20	-
44484956	44484957	429-09	20	+
50858404	50858405	1095-09	20	-
115620678	115620679	1095-09	20	+
175301448	175301449	429-09	19	+
101930833	101930834	482-09	19	+	Cntnap5b	Cntnap5b
57501423	57501424	1095-09	19	-	Galnt10
33801800	33801801	756-09	19	+	Hnrnpm
27225803	27225804	1095-09	19	-	Hook3	Hook3
49467283	49467284	1586-09	19	+
16114370	16114371	429-09	19	+
12685021	12685022	1095-09	19	-
18505740	18505741	429-09	19	+
32138465	32138466	320-09	19	+
107543959	107543960	1095-09	18	+	Helz	Helz
91512389	91512390	1095-09	18	+	Lrrk2	Lrrk2
76248933	76248934	429-09	18	+	Osbpl6	Osbpl6
76533972	76533973	320-09	18	-	Ptprd	Ptprd
77069996	77069997	1095-09	18	+	Ptprd
84741270	84741271	429-09	18	+	Zfp407
96732804	96732805	429-09	18	-
100579151	100579152	429-09	18	+
70336341	70336342	09-1095	18	-
75578071	75578072	1586-09	18	+
83582379	83582380	09-429	18	+
25177478	25177479	1095-09	18	+
98501980	98501981	429-09	18	-
90263893	90263894	429-09	18	+
130100582	130100583	429-09	18	-
24300123	24300124	756-09	17	-	Dpy19l1	Dpy19l1
79329430	79329431	385-09	17	+	Evi2b|Gm21975|Nf1	Nf1
43516700	43516701	833-09	17	-	Nck2
78386028	78386029	429-09	17	-	Nlk	Nlk
53850275	53850276	09-1095	17	-	Tmem38b
34798876	34798877	429-09	17	+	Zfp292
23647247	23647248	482-09	17	+
30407464	30407465	968-09	17	-
8066972	8066973	650-08	17	+
18833770	18833771	1095-09	17	-
20414923	20414924	429-09	17	+
81445484	81445485	429-09	17	-
67286505	67286506	1486-09	16	-	1700111N16Rik	1700111N16Rik
31051115	31051116	429-09	16	+	Cacna1d
123936676	123936677	650-08	16	+
108148378	108148379	1095-09	16	-	Dag1	Dag1
86440430	86440431	756-09	16	+	Dopey1	Dopey1
165576022	165576023	482-09	16	-	Eya2
71382654	71382655	1486-09	16	+	Fam135b
113294622	113294623	09-1095	16	+	Fmn1	Fmn1
34601725	34601726	429-09	16	+	Gapvd1
7149176	7149177	1095-09	16	-	Pcmtd1
56146314	56146315	429-09	16	+	Peak1
99034786	99034787	756-09	16	+	Pik3cb
106649640	106649641	385-09	16	+	Rad54l2
86938089	86938090	429-09	16	-
32743756	32743757	429-09	16	-
75878822	75878823	429-09	16	-
57727258	57727259	429-09	16	+
12877859	12877860	429-09	16	-
46735448	46735449	429-09	16	+
113634188	113634189	1095-09	16	+
22164490	22164491	1486-09	15	-	Adk
43035549	43035550	1095-09	15	-	Atp10b
105321105	105321106	429-09	15	+	Atp2c1
103005457	103005458	429-09	15	+	Atrx
99157655	99157656	756-09	15	-	Cep70
121107464	121107465	429-09	15	+	D930020B18Rik	D930020B18Rik
72238862	72238863	429-09	15	+	Dcc
15000766	15000767	429-09	15	-	Foxp2
38531031	38531032	833-09	15	+	Luc7l2	Luc7l2
5228965	5228966	429-09	15	-	Pon2	Pon2
130909180	130909181	320-09	15	-	Siglec1	Siglec1
70127179	70127180	1586-09	15	+	Spag16	Spag16
63640984	63640985	429-09	15	+	Tnc
4649564	4649565	09-448	15	-
26833833	26833834	1095-09	15	+
49769378	49769379	429-09	15	-
43511814	43511815	1095-09	15	+
85896630	85896631	756-09	15	+
145663562	145663563	574-09	14	+	1700095A21Rik|Gm13247	1700095A21Rik
53426663	53426664	756-09	14	+	Cul5
37963890	37963891	1095-09	14	-
131512383	131512384	09-448	14	-	Epb4.1	Epb4.1
37037920	37037921	09-1095	14	-	F13a1	F13a1
27842702	27842703	385-09	14	-
44949214	44949215	968-09	14	-	Jarid2
77015640	77015641	756-09	14	+	Mlip
103548241	103548242	1095-09	14	-	Mycbp2	Mycbp2
79262768	79262769	833-09	14	-	Nf1
58487275	58487276	756-09	14	-	Nptn
99798685	99798686	1586-09	14	-	Pam	Pam
51556416	51556417	482-09	14	-	Prkd1	Prkd1
79431527	79431528	429-09	14	-
27809835	27809836	1586-09	14	-	Ptprk
161222519	161222520	09-429	14	+	Rfwd2	Rfwd2
28012479	28012480	1486-09	14	+	Rfx3
37344426	37344427	09-1095	14	+	Spata5	Spata5
81656029	81656030	1486-09	14	-	Zfp827
27276513	27276514	429-09	14	-
37372705	37372706	1095-09	14	-
15680789	15680790	1486-09	14	+
93689078	93689079	320-09	14	+
99220527	99220528	429-09	14	+
83655603	83655604	1095-09	14	-
85902003	85902004	1095-09	14	-
89324970	89324971	320-09	14	-
37842793	37842794	1095-09	14	-
74770243	74770244	1486-09	13	+	Specc1l	Specc1l
136361199	136361200	1095-09	13	-	Ankef1
114014901	114014902	429-09	13	-
53102899	53102900	429-09	13	+	Ext1
88981168	88981169	320-09	13	-
52857818	52857819	1486-09	13	+	Inpp1
11047434	11047435	1095-09	13	-	Ms4a10	Ms4a10
58793863	58793864	320-09	13	-
10806427	10806428	385-09	13	-
54389864	54389865	385-09	13	-	Rapgef6
29067456	29067457	1486-09	13	+
116056133	116056134	429-09	13	-	Tgfbr2	Tgfbr2
150195644	150195645	1486-09	13	-	Tspan32
30199439	30199440	756-09	13	+	Ube2h
173572541	173572542	1486-09	13	+	Vapb	Vapb
19598041	19598042	833-09	13	+	Wwp1
88589373	88589374	429-09	13	-	Zbed4
67417376	67417377	429-09	13	+	Zfp595
116988124	116988125	1352-09	13	-
18587655	18587656	429-09	13	+
99156401	99156402	1586-09	13	-
43899337	43899338	1095-09	13	-
122561161	122561162	1095-09	13	-
37681512	37681513	429-09	13	-
43064480	43064481	1095-09	12	-	Atp10b
70766399	70766400	1486-09	12	-	Ice1	Ice1
56956084	56956085	833-09	12	-	Brms1l
47155305	47155306	756-09	12	-	Cntnap2
145936406	145936407	429-09	12	+	Cpsf4	Cpsf4
71878592	71878593	1095-09	12	-	Dcc	Dcc
60671539	60671540	1095-09	12	+	Dhrs7b	Dhrs7b
57586153	57586154	1095-09	12	-	Edc3
35040791	35040792	429-09	12	+	Ehmt2	Ehmt2
41980800	41980801	429-09	12	+	Foxo3
118563083	118563084	756-09	12	+	Hcn1	Hcn1
63123851	63123852	429-09	12	+	Ino80d
26373836	26373837	482-09	12	+	Itfg3
31453834	31453835	1486-09	12	-	Mkln1
28143976	28143977	1486-09	12	-	Opcml
45959663	45959664	1486-09	12	+	Plcxd2
27009214	27009215	429-09	12	-	Rnf144a	Rnf144a
84661391	84661392	1486-09	12	-	Smtnl1	Smtnl1
99026326	99026327	1095-09	12	+	Spats2	Spats2
121923954	121923955	1095-09	12	-	Tmem116
161742059	161742060	574-09	12	+	Tnr	Tnr
60106068	60106069	429-09	12	+	Tom1l2
113873366	113873367	1486-09	12	-	Ubp1
111231576	111231577	429-09	12	-
166161665	166161666	429-09	12	-
48592422	48592423	1095-09	12	-
40809703	40809704	1095-09	12	+
94330607	94330608	1486-09	12	-
83894934	83894935	1486-09	12	-
9143446	9143447	429-09	12	+
15484614	15484615	1095-09	12	+
79519734	79519735	385-09	12	+
104844682	104844683	968-09	12	-
47960902	47960903	385-09	12	-
138108929	138108930	1095-09	12	+
15762240	15762241	429-09	12	-
112766833	112766834	1486-09	12	-
93447921	93447922	429-09	12	+
14501652	14501653	1095-09	12	+
47565255	47565256	756-09	11	+	Cadm1	Cadm1
58991131	58991132	756-09	11	-	Ccdc148	Ccdc148
101848241	101848242	1095-09	11	-	Cntnap5b
57207575	57207576	650-08	11	+	Dennd1c
49352940	49352941	320-09	11	+	Epc2	Epc2
120665266	120665267	833-09	11	-	Far1
34239301	34239302	968-09	11	-	Frk
156935836	156935837	1486-09	11	+	Adgrg2	Adgrg2
182740740	182740741	429-09	11	-	H3f3a	H3f3a
126423452	126423453	1486-09	11	+	Hdc
163320727	163320728	1486-09	11	-	Hnf4aos|R3hdml	Hnf4aos
20811601	20811602	756-09	11	+	Mrpl4	Mrpl4
4331783	4331784	429-09	11	+	Ncoa1
58930371	58930372	756-09	11	-	Ntrk2
53336172	53336173	1486-09	11	+	Nubpl	Nubpl
58337507	58337508	1744-09	11	+	Pcdh7	Pcdh7
44841604	44841605	1095-09	11	-	Prep
53753723	53753724	1095-09	11	+	Rbm20	Rbm20
75089699	75089700	1559-09	11	-	Smim7	Smim7
88358169	88358170	1486-09	11	+	Syncrip
57200021	57200022	756-09	11	-	Tbc1d23	Tbc1d23
106427124	106427125	1093-09	11	-	Tex2	Tex2
11088356	11088357	09-1095	11	-	Trp53inp1
133316233	133316234	1486-09	11	-	Xpo6	Xpo6
48878138	48878139	1486-09	11	+	Zw10	Zw10
148883433	148883434	574-09	11	-
47340662	47340663	1352-09	11	+
27291094	27291095	320-09	11	+
80965177	80965178	385-09	11	+
90242320	90242321	429-09	11	+
81041040	81041041	09-1095	11	-
82140921	82140922	320-09	11	-
42349703	42349704	1486-09	11	+
78521373	78521374	756-09	11	-
91812282	91812283	1095-09	11	+
102713915	102713916	1486-09	11	-
125955261	125955262	1095-09	10	-	9030624J02Rik
79658866	79658867	09-429	10	-	Ap1s3	Ap1s3
98944097	98944098	429-09	10	-	Arhgef28	Arhgef28
25576239	25576240	429-09	10	-	Adgrb3	Adgrb3
76975256	76975257	385-09	10	-	Ccdc141	Ccdc141
67269926	67269927	1486-09	10	+	Cps1	Cps1
152082657	152082658	756-09	10	-	Csnk2a1
118085827	118085828	1095-09	10	+	Cyth1
44424966	44424967	833-09	10	+	Ddx6	Ddx6
68995537	68995538	756-09	10	+	Erbb4
79722819	79722820	1586-09	10	+	Fam198b	Fam198b
94742127	94742128	1486-09	10	+	Gpc1	Gpc1
56803585	56803586	1095-09	10	+
108226862	108226863	1095-09	10	+	Rhoa	Rhoa
13748732	13748733	1486-09	10	+	Hivep2	Hivep2
48905162	48905163	1095-09	10	-	Ifi47|Olfr56
103379803	103379804	1095-09	10	-	Kctd12	Kctd12
100433663	100433664	1486-09	10	-	Klf12	Klf12
68406433	68406434	1095-09	10	+	Ldlrad4	Ldlrad4
13488136	13488137	320-09	10	+	Maml2	Maml2
103117334	103117335	1095-09	10	+	Map3k14
7567921	7567922	756-09	10	+	Mmp8	Mmp8
70076026	70076027	429-09	10	-	Myo1e
38860432	38860433	429-09	10	-
7427421	7427422	320-09	10	-	Otud5
123286860	123286861	320-09	10	+	Pcca	Pcca
102193047	102193048	650-08	10	+	Pde4b	Pde4b
56236827	56236828	09-872	10	-	Peak1	Peak1
23557089	23557090	1095-09	10	-	Pex13	Pex13
106228160	106228161	1486-09	10	-	Ppfia2
75892303	75892304	1744-09	10	-	Ptprd	Ptprd
96472857	96472858	429-09	10	-	Rasa2	Rasa2
107740814	107740815	1586-09	10	+	Rbm6
38174723	38174724	1486-09	10	+	Rev1
59933647	59933648	09-833	10	+
52457309	52457310	574-09	10	+	Smc2	Smc2
61959236	61959237	429-09	10	-	Srgn	Srgn
100693735	100693736	1486-09	10	+	Stag1	Stag1
100760333	100760334	429-09	10	+	Stag1	Stag1
14301903	14301904	385-09	10	+	Synpr	Synpr
59462261	59462262	756-09	10	+	Tanc1	Tanc1
90134704	90134705	1586-09	10	-	Tbc1d2b	Tbc1d2b
71771392	71771393	385-09	10	-	Tcf12	Tcf12
21851868	21851869	1095-09	10	+	Vcl	Vcl
101771995	101771996	1486-09	10	-	Zdhhc15	Zdhhc15
20603515	20603516	385-09	10	-	Zfp182	Zfp182
127516955	127516956	09-1095	10	-
72149093	72149094	429-09	10	-
92117529	92117530	429-09	10	-
41848177	41848178	1095-09	10	+
116662721	116662722	320-09	10	+
119112891	119112892	756-09	10	+
44644497	44644498	320-09	10	+
49629502	49629503	320-09	10	+
58304911	58304912	1351-09	10	-
94610886	94610887	1486-09	10	+
59806103	59806104	320-09	10	-
110809821	110809822	320-09	10	+
70585780	70585781	968-09	10	+
119833366	119833367	1095-09	10	-
56507463	56507464	09-114	10	-
141442609	141442610	1486-09	10	+
30861256	30861257	1095-09	10	+
59705943	59705944	320-09	10	-
16733369	16733370	756-09	10	-
39783766	39783767	1095-09	10	-
85852004	85852005	429-09	10	-
89984727	89984728	09-429	10	+
92990302	92990303	429-09	10	+
50578971	50578972	1095-09	9	-	Fdxacb1
77343928	77343929	320-09	9	+	Mir99ahg	Mir99ahg
97929121	97929122	1486-09	9	-	4930467D21Rik
36770974	36770975	1486-09	9	+	Ankhd1	Ankhd1
54935762	54935763	833-09	9	-	Ankrd44	Ankrd44
75663949	75663950	09-448	9	-	Bmp5
90866062	90866063	1095-09	9	+	Brd7
98060344	98060345	1559-09	9	-	Ccdc113
61147409	61147410	429-09	9	-	Ccser1
88936709	88936710	1095-09	9	-	Cdkn2a	Cdkn2a
66746823	66746824	385-09	9	+
76620839	76620840	09-429	9	-	Col18a1	Col18a1
100965847	100965848	833-09	9	-	Cops4
44719324	44719325	1486-09	9	-	Ebf1
29646721	29646722	756-09	9	-	Eml6	Eml6
28496524	28496525	09-833	9	-	En2
46384453	46384454	320-09	9	-	Enox2	Enox2
11270125	11270126	09-872	9	+	Esrp1
95478369	95478370	09-429	9	+	Farp2	Farp2
49457468	49457469	756-09	9	+
24770392	24770393	09-448	9	-	Kcnma1	Kcnma1
123416846	123416847	756-09	9	+	Limd1	Limd1
23503943	23503944	429-09	9	-	Mamdc2	Mamdc2
147257575	147257576	1486-09	9	-	Mfn2	Mfn2
73022983	73022984	1095-09	9	+	Ola1
93777529	93777530	320-09	9	-
72370270	72370271	385-09	9	+	Pbx4	Pbx4
34724801	34724802	1486-09	9	-	Ppp2cb
73197019	73197020	320-09	9	+	Ptk2
18040282	18040283	756-09	9	-
28694572	28694573	1095-09	9	+	Rbm33	Rbm33
44126189	44126190	1486-09	9	-	Rcan2
161211834	161211835	1586-09	9	-	Rfwd2
155750751	155750752	1095-09	9	-	Rps6ka3
102772875	102772876	968-09	9	+	Ryk	Ryk
121733502	121733503	1486-09	9	-	Stk24	Stk24
17767893	17767894	1586-09	9	-	Sugct	Sugct
44577425	44577426	09-114	9	+	Tapt1
65564245	65564246	756-09	9	-	Tnip3
44786713	44786714	1486-09	9	-	Zcchc7
122770138	122770139	320-09	9	+	Zfp445
196824455	196824456	320-09	9	-
90982659	90982660	1586-09	9	-
80326010	80326011	1095-09	9	-
84134949	84134950	429-09	9	-
75132796	75132797	968-09	9	-
28321352	28321353	1486-09	9	+
54697621	54697622	429-09	9	-
115273375	115273376	756-09	9	-
6378301	6378302	1586-09	9	+
66630543	66630544	320-09	9	+
103223869	103223870	09-1095	9	+
47527649	47527650	09-429	9	-
11522989	11522990	385-09	9	-
4193270	4193271	1486-09	9	+
132526017	132526018	09-1095	9	-
92631578	92631579	320-09	9	-
11491456	11491457	968-09	9	-
40386199	40386200	429-09	9	+
90549661	90549662	1486-09	9	-
118760045	118760046	1095-09	8	-
28908324	28908325	320-09	8	-	2610307P16Rik	2610307P16Rik
16932496	16932497	1486-09	8	-	4930515L03Rik	4930515L03Rik
135109332	135109333	1486-09	8	+	Ube2d3	Ube2d3
9390992	9390993	1095-09	8	-	Abca13
122109038	122109039	1486-09	8	+	Acad10
147180575	147180576	968-09	8	-
141188202	141188203	320-09	8	-	Brat1
42367197	42367198	385-09	8	-	Angpt1	Angpt1
42404531	42404532	429-09	8	+	Angpt1
126505641	126505642	385-09	8	+	Camk2d	Camk2d
20441102	20441103	1486-09	8	+	Ceacam16|Gm19345	Gm19345
18114583	18114584	833-09	8	-	Chordc1
38602584	38602585	385-09	8	-
84566273	84566274	1486-09	8	-	Cntln
55243754	55243755	429-09	8	+	Col14a1	Col14a1
107458852	107458853	1486-09	8	-	Rassf1
144515641	144515642	1351-09	8	+
46228856	46228857	1486-09	8	-	Ddhd1	Ddhd1
58066196	58066197	968-09	8	+	Edar
14164429	14164430	09-1095	8	-	Eya1	Eya1
86979454	86979455	756-09	8	+
108507479	108507480	429-09	8	+	Gpsm2
108227098	108227099	833-09	8	-	Rhoa
37279511	37279512	1351-09	8	-	Grhl2
83013375	83013376	1352-09	8	-	Hmgn3	Hmgn3
91380467	91380468	1586-09	8	-	Ifnar2
26961132	26961133	1486-09	8	-	Jam3	Jam3
46975751	46975752	429-09	8	+	Kif13a
123367673	123367674	320-09	8	-	Lars2
3323187	3323188	320-09	8	-	Rnf185	Rnf185
157839468	157839469	1486-09	8	+	Lrrc7
90022849	90022850	1486-09	8	-
99290776	99290777	833-09	8	-	Mras	Mras
80563870	80563871	1095-09	8	-	Myo1d	Myo1d
94648217	94648218	1352-09	8	+
43566842	43566843	1352-09	8	+	Nck2	Nck2
82106947	82106948	1093-09	8	-	Nfib	Nfib
75064618	75064619	09-598	8	-	Nhej1	Nhej1
12277580	12277581	1586-09	8	-
33059416	33059417	756-09	8	-	Parg
11785935	11785936	1486-09	8	+	Park2	Park2
79710571	79710572	1486-09	8	-	Pde1a	Pde1a
92255924	92255925	320-09	8	+	Pdzrn4	Pdzrn4
82762589	82762590	320-09	8	+	Phip
32885122	32885123	09-1095	8	-	Pten
32898257	32898258	1486-09	8	-	Pten
12665938	12665939	385-09	8	+	Ptprg	Ptprg
12763576	12763577	1095-09	8	-	Ptprg
171603116	171603117	1586-09	8	-	Rgs5
155776352	155776353	756-09	8	+	Rps6ka3	Rps6ka3
38018889	38018890	1095-09	8	+	Rreb1	Rreb1
125613069	125613070	1095-09	8	-
70851297	70851298	1095-09	8	+	Sh2d4a	Sh2d4a
101587807	101587808	1586-09	8	-	Slc30a5	Slc30a5
53523970	53523971	1586-09	8	-	Slc44a1
75070325	75070326	385-09	8	-	Snapc1
19861474	19861475	09-1095	8	-	Spred2
105625118	105625119	429-09	8	-	Srek1ip1
23136044	23136045	385-09	8	-
82617730	82617731	1095-09	8	+	Synj2bp
66523092	66523093	968-09	8	+	Tg	Tg
43441688	43441689	756-09	8	-	Tpk1	Tpk1
27855037	27855038	1586-09	8	-	Trio	Trio
6977103	6977104	756-09	8	-
16591256	16591257	1586-09	8	-	Ube2w	Ube2w
21272375	21272376	429-09	8	-
12297559	12297560	1486-09	8	+	Utrn
120347098	120347099	09-833	8	-	Zfp106	Zfp106
17512194	17512195	09-1095	8	-
96999906	96999907	1486-09	8	-
10004116	10004117	1486-09	8	-
63668936	63668937	1486-09	8	-
22494818	22494819	1486-09	8	+
88412677	88412678	320-09	8	-
38341376	38341377	1486-09	8	+
68923091	68923092	1586-09	8	+
86629663	86629664	1586-09	8	-
45577655	45577656	09-1095	8	+
4691223	4691224	429-09	8	-
29241872	29241873	1486-09	8	+
73893214	73893215	429-09	8	-
173785165	173785166	320-09	8	-
76849215	76849216	756-09	8	-
148875186	148875187	1744-09	8	-
44230338	44230339	1093-09	8	+
53039397	53039398	1095-09	8	+
55762505	55762506	1744-09	8	+
71957779	71957780	482-09	8	+
46947647	46947648	1095-09	8	-
51624291	51624292	320-09	8	+
130161112	130161113	756-09	8	+
54316950	54316951	429-09	8	+
80116184	80116185	385-09	8	-
5473496	5473497	429-09	8	+
122390280	122390281	429-09	8	-
25898908	25898909	1486-09	8	+
34018998	34018999	320-09	8	+
40314800	40314801	1486-09	8	+
61742647	61742648	429-09	8	+
84808204	84808205	320-09	8	+
86616541	86616542	756-09	8	+
91003475	91003476	1586-09	8	-
97078331	97078332	09-429	8	+
148497512	148497513	1095-09	8	+
36876458	36876459	429-09	8	-
153895426	153895427	1486-09	7	+	1700025G04Rik
47061218	47061219	833-09	7	+	Ufsp2	Ufsp2
88389909	88389910	1095-09	7	-	1700066N21Rik	1700066N21Rik
23080789	23080790	320-09	7	-	1700112E06Rik
58579099	58579100	1486-09	7	-	4930593A02Rik
86223097	86223098	320-09	7	-	Acan
22170763	22170764	1486-09	7	-	Adk
42460737	42460738	1586-09	7	+	Angpt1
54754051	54754052	1744-09	7	-	Ankrd44	Ankrd44
98897052	98897053	1095-09	7	+	Atg4c	Atg4c
70493274	70493275	833-09	7	-	Camta2	Camta2
138827965	138827966	650-08	7	-	Capzb
35911672	35911673	1486-09	7	+	Ccdc144b
31527939	31527940	1486-09	7	+	Cct5
119386784	119386785	1486-09	7	+	Chp1	Chp1
72890429	72890430	756-09	7	+
6274032	6274033	09-114	7	-	Dab2
56368511	56368512	650-08	7	+	Nop9	Nop9
164009974	164009975	1586-09	7	-	Dnm3	Dnm3
101915968	101915969	756-09	7	-	Eif4b
63768496	63768497	429-09	7	+	Epha3
79343458	79343459	833-09	7	+	Evi2a|Gm21975|Nf1	Nf1
65372607	65372608	320-09	7	+	Fam114a1	Fam114a1
77970771	77970772	1095-09	7	-	Fam172a
65912524	65912525	1095-09	7	-	Fbxo16
41767369	41767370	320-09	7	-	Gabrg2	Gabrg2
16808615	16808616	1486-09	7	-	Gm20125	Gm20125
66889272	66889273	1095-09	7	+	Gng12	Gng12
64098769	64098770	1486-09	7	-	Grid2
35193140	35193141	1586-09	7	-	Hdac9	Hdac9
98199278	98199279	429-09	7	-	Inadl
115667559	115667560	833-09	7	+	Itga2
100245314	100245315	09-872	7	-	Jup	Jup
68878037	68878038	756-09	7	-	Khdrbs3
180736008	180736009	756-09	7	-	Kif26b
36000178	36000179	968-09	7	+	Kpna1	Kpna1
80581656	80581657	1095-09	7	-	Lrrtm4
123611964	123611965	1486-09	7	-	Lztfl1	Lztfl1
140790315	140790316	320-09	7	+	Macrod2	Macrod2
28848428	28848429	385-09	7	+	Mapk14	Mapk14
120701783	120701784	429-09	7	+	Mbnl2	Mbnl2
132639882	132639883	1095-09	7	+	Trmt6
15065328	15065329	09-1095	7	+	Med17
4031799	4031800	1486-09	7	-
84118577	84118578	429-09	7	-	Mta3
80063952	80063953	1095-09	7	+	Myo6	Myo6
69260654	69260655	756-09	7	+	Ice2	Ice2
79278478	79278479	968-09	7	+	Nf1	Nf1
97566295	97566296	09-1095	7	-	Nfia
117772532	117772533	650-08	7	-	Parp8	Parp8
73363130	73363131	429-09	7	+	Pcdh15	Pcdh15
107481886	107481887	320-09	7	-	Pign	Pign
101163937	101163938	1486-09	7	+
15729847	15729848	1486-09	7	+	Prkdc	Prkdc
87967639	87967640	1797-09	7	-	Psmd1
130308834	130308835	1486-09	7	-	Pum1
3271041	3271042	385-09	7	+	Rab10
7319761	7319762	1586-09	7	+	Rbfox1	Rbfox1
154443268	154443269	320-09	7	-	Rgl1	Rgl1
89263141	89263142	385-09	7	+	Rttn	Rttn
100197175	100197176	1095-09	7	+	Rybp
151353305	151353306	756-09	7	+
95021693	95021694	1486-09	7	+	Slc9a9	Slc9a9
26729152	26729153	429-09	7	+	Smarca2	Smarca2
151945444	151945445	1486-09	7	-	Stard13	Stard13
117406264	117406265	320-09	7	-	Swap70
137852440	137852441	09-448	7	-	Tacc2
139856239	139856240	09-114	7	+	Tasp1
28310679	28310680	756-09	7	+	Tnik	Tnik
112445137	112445138	1486-09	7	+	Traf3	Traf3
27200584	27200585	429-09	7	+	Vav2
94172095	94172096	429-09	7	-	Vmn2r79
106749971	106749972	833-09	7	+	Vprbp	Vprbp
38528122	38528123	1095-09	7	+	Vwa5a	Vwa5a
124150678	124150679	429-09	7	+	Zcchc14
65569718	65569719	1095-09	7	-	Zfp609	Zfp609
114607157	114607158	429-09	7	-
139817083	139817084	1095-09	7	+
33011180	33011181	1095-09	7	-
48446357	48446358	1744-09	7	-
21371691	21371692	429-09	7	-
47601599	47601600	429-09	7	+
56248289	56248290	1486-09	7	+
26081972	26081973	385-09	7	+
70771914	70771915	09-429	7	-
29006004	29006005	1586-09	7	+
39965109	39965110	1486-09	7	-
47948254	47948255	1486-09	7	-
14733084	14733085	09-1095	7	-
61764537	61764538	385-09	7	+
151460826	151460827	1486-09	7	-
73982488	73982489	429-09	7	+
21251657	21251658	1586-09	7	-
21394236	21394237	320-09	7	-
4204426	4204427	320-09	7	+
75717518	75717519	1586-09	7	-
79397661	79397662	1486-09	7	-
81031265	81031266	756-09	7	-
109283386	109283387	1586-09	7	-
136144279	136144280	1586-09	7	+
143022167	143022168	09-872	7	+
14936630	14936631	1486-09	7	+
62012895	62012896	385-09	7	+
26835594	26835595	1486-09	7	+
45277400	45277401	320-09	7	-
61708674	61708675	09-1095	7	-
88852179	88852180	320-09	7	-
18505810	18505811	320-09	7	+
26138989	26138990	1586-09	7	-
35127234	35127235	1586-09	7	+
47085292	47085293	429-09	7	+
52151468	52151469	756-09	7	-
85236283	85236284	320-09	7	-
85873924	85873925	1586-09	7	+
91243008	91243009	1486-09	7	-
83200783	83200784	833-09	6	+
72382008	72382009	09-1095	6	-	Rfx7
81976754	81976755	320-09	6	+	Susd6	Susd6
81190325	81190326	320-09	6	+	9330111N05Rik	9330111N05Rik
72462642	72462643	385-09	6	+	A330049N07Rik
74925324	74925325	1352-09	6	-	Myo5b
46479997	46479998	1095-09	6	-	Sufu
8415794	8415795	833-09	6	+	Adarb2	Adarb2
126089467	126089468	09-1095	6	+	Ago3
12976369	12976370	429-09	6	+	Airn	Airn
72857374	72857375	429-09	6	+	Alk
141217543	141217544	756-09	6	-	Amz1
58333919	58333920	1586-09	6	-
66965865	66965866	385-09	6	+	Apbb2
53304710	53304711	1486-09	6	-	Atm	Atm
95843630	95843631	320-09	6	-	Atr
32569012	32569013	1351-09	6	+	Bin1	Bin1
45441191	45441192	756-09	6	+	Btrc	Btrc
87719635	87719636	756-09	6	+	Cab39	Cab39
93297516	93297517	756-09	6	-	Car10
50802441	50802442	1586-09	6	+
6893461	6893462	385-09	6	+	Celf2
133755359	133755360	1586-09	6	-	Gm7534	Gm7534
71560166	71560167	968-09	6	+	Cgnl1
183321935	183321936	320-09	6	+	Cnih3	Cnih3
10744677	10744678	1486-09	6	+	Cntn5
32422258	32422259	1095-09	6	-	Cog5
4694694	4694695	1486-09	6	-	Dnaja3
21952146	21952147	385-09	6	+	Cped1	Cped1
65810488	65810489	429-09	6	+	Csnk1g1	Csnk1g1
110439295	110439296	1095-09	6	-	Dach2
174106833	174106834	429-09	6	+	Dcaf8	Dcaf8
38140808	38140809	429-09	6	+	Dennd1a
126762607	126762608	385-09	6	+	Diap2	Diap2
50120132	50120133	1486-09	6	+	Dmxl1	Dmxl1
107148683	107148684	1486-09	6	-
125395036	125395037	385-09	6	-	Dpp10	Dpp10
75875508	75875509	650-08	6	-	Ell2
183876482	183876483	833-09	6	-	Enah	Enah
121498085	121498086	650-08	6	-	Epb4.1l5	Epb4.1l5
28509348	28509349	1095-09	6	-	Erc2
24074506	24074507	320-09	6	+	Fam135a
78438453	78438454	1095-09	6	-	Farsb	Farsb
82804484	82804485	1486-09	6	-
10654889	10654890	1095-09	6	+	Fhit
94092070	94092071	1586-09	6	+	Fto	Fto
97167418	97167419	833-09	6	-	Gm10754	Gm10754
43425734	43425735	756-09	6	-	Zbtb20
63841265	63841266	1350-09	6	-	Grid2
14525332	14525333	1486-09	6	+	Hecw1
33688439	33688440	320-09	6	+	Heg1	Heg1
93717236	93717237	1095-09	6	+	Heph	Heph
24965436	24965437	09-429	6	-
65212011	65212012	1486-09	6	-	Hiatl1	Hiatl1
3280675	3280676	09-232	6	-
99440741	99440742	1486-09	6	-	Itgb3bp	Itgb3bp
33679449	33679450	833-09	6	+	Kcnip1
91956385	91956386	320-09	6	+
38538659	38538660	385-09	6	+	Luc7l2	Luc7l2
49669910	49669911	1095-09	6	+	Mapk9	Mapk9
82741220	82741221	1352-09	6	-	Mff
121088384	121088385	385-09	6	+
88246826	88246827	320-09	6	-	Sema4a	Sema4a
7642554	7642555	1486-09	6	-	Mmp20
4394591	4394592	1486-09	6	+	Mtpap	Mtpap
93657566	93657567	1095-09	6	+	Nr2c1	Nr2c1
97620336	97620337	1586-09	6	+	Nfia	Nfia
90470557	90470558	429-09	6	+	Nrxn1
28918150	28918151	429-09	6	+	Ntm
29520987	29520988	1486-09	6	-	Ntm	Ntm
18826914	18826915	385-09	6	+
35774798	35774799	1486-09	6	-	Paip2|Slc23a1	Slc23a1
129915494	129915495	756-09	6	+	Pard3	Pard3
122967158	122967159	09-833	6	+	Pcca	Pcca
6307566	6307567	1486-09	6	-	Pdgfd
30855954	30855955	429-09	6	-	Phc3	Phc3
10192906	10192907	429-09	6	+
100787008	100787009	320-09	6	-	Ppp4r2
99439395	99439396	833-09	6	+	Prkg2
30722628	30722629	385-09	6	-	Prrx2
20551233	20551234	1486-09	6	+	Ptpn12
34488381	34488382	429-09	6	+	Wrn
43547131	43547132	385-09	6	-	Ranbp9	Ranbp9
117493099	117493100	320-09	6	-	Rbms3	Rbms3
39983469	39983470	1586-09	6	-	Rn45s
155771155	155771156	1486-09	6	-	Rps6ka3
29628049	29628050	320-09	6	-	Rtn4
11715859	11715860	1486-09	6	-	Ryr2	Ryr2
141893566	141893567	833-09	6	+	Sdk1	Sdk1
97907926	97907927	385-09	6	+	Senp1
83484581	83484582	385-09	6	-	Sh3bgrl2
21484067	21484068	756-09	6	+	Smarca4	Smarca4
87584711	87584712	1586-09	6	+	Sp100	Sp100
58001730	58001731	1486-09	6	+	Spats2l	Spats2l
71740220	71740221	1486-09	6	+	Tcf12
87838429	87838430	429-09	6	+	Tdrd3	Tdrd3
84419837	84419838	1486-09	6	+	Tmem161b	Tmem161b
98883845	98883846	429-09	6	+	Top2a
103095487	103095488	1486-09	6	-	Trim33
87232867	87232868	320-09	6	+	Ttll5	Ttll5
86283604	86283605	320-09	6	-	Ube2cbp	Ube2cbp
139038190	139038191	320-09	6	-	Ubr4
38817408	38817409	09-598	6	-
6275254	6275255	1586-09	6	-	Usp6nl
35319737	35319738	429-09	6	-	Vps13b
3535481	3535482	09-833	6	+	Xkr4
30840481	30840482	320-09	6	-	Zbtb44
51957608	51957609	756-09	6	+	Zc3h12c
34817615	34817616	1586-09	6	+	Zfp292
65392018	65392019	429-09	6	+	Zfp369	Zfp369
20169367	20169368	1486-09	6	+	Zfp560
55120822	55120823	1486-09	6	+	Zfp608
62777321	62777322	574-09	6	-	Zfp618
108025714	108025715	385-09	6	+
150471389	150471390	320-09	6	-
27419428	27419429	385-09	6	+
33362903	33362904	482-09	6	+
46844656	46844657	1586-09	6	+
50206437	50206438	1744-09	6	+
5323108	5323109	09-1095	6	-
56513451	56513452	09-429	6	+
94884389	94884390	09-429	6	-
3301020	3301021	429-09	6	-
26814047	26814048	1095-09	6	+
32098883	32098884	1586-09	6	+
33038871	33038872	756-09	6	-
34243389	34243390	320-09	6	-
67560664	67560665	429-09	6	-
114360670	114360671	574-09	6	-
116452017	116452018	1486-09	6	+
119128420	119128421	756-09	6	+
39494290	39494291	1744-09	6	-
8597669	8597670	968-09	6	-
86489094	86489095	09-1095	6	-
13989040	13989041	1486-09	6	-
29247254	29247255	385-09	6	+
44474865	44474866	429-09	6	-
4471511	4471512	429-09	6	-
10175288	10175289	09-833	6	+
41595381	41595382	385-09	6	+
48737548	48737549	320-09	6	-
80126552	80126553	1586-09	6	+
114266616	114266617	1486-09	6	+
127453711	127453712	968-09	6	+
142318211	142318212	320-09	6	+
148919709	148919710	429-09	6	-
149831583	149831584	09-598	6	+
64096630	64096631	385-09	6	+
132251574	132251575	756-09	6	+
45628941	45628942	833-09	6	-
8613867	8613868	1559-09	6	+
107809939	107809940	833-09	6	-
108460740	108460741	429-09	6	+
121232966	121232967	1093-09	6	-
141826593	141826594	1095-09	6	+
50756926	50756927	1486-09	6	+
7609772	7609773	09-448	6	-
85104701	85104702	1586-09	6	-
39731514	39731515	1095-09	6	-
40735782	40735783	1352-09	6	-
46509010	46509011	385-09	6	+
61192587	61192588	429-09	6	+
28934340	28934341	385-09	6	-
89248334	89248335	756-09	6	-
103168769	103168770	429-09	6	-
142501870	142501871	385-09	6	-
92737812	92737813	833-09	6	-
11611274	11611275	1586-09	6	+
128478648	128478649	1095-09	6	-
97720305	97720306	1486-09	6	-
115572597	115572598	1586-09	6	-
33351906	33351907	1486-09	6	+
84361128	84361129	320-09	6	-
85890146	85890147	833-09	6	+
86880317	86880318	320-09	6	-
141989758	141989759	1486-09	6	-
163377512	163377513	756-09	6	+
57870107	57870108	429-09	6	+
23799023	23799024	320-09	5	-	1700112E06Rik
117678816	117678817	385-09	5	+	4930412B13Rik	4930412B13Rik
138301541	138301542	429-09	5	+
31949286	31949287	1586-09	5	+	A1cf	A1cf
31062340	31062341	1486-09	5	-	Lincpint	Lincpint
26814232	26814233	1586-09	5	+	Thyn1|Vps26b	Thyn1
91029745	91029746	1744-09	5	+	Nr1h3
59157653	59157654	1095-09	5	-	Adpgk
29737861	29737862	320-09	5	-	Ahcyl2
17480653	17480654	1586-09	5	+	Crkl	Crkl
140755295	140755296	1486-09	5	-	Alg13
36757597	36757598	756-09	5	+	Ankhd1	Ankhd1
95255120	95255121	574-09	5	-	Ap3b1
84357820	84357821	320-09	5	+	Arfip1
65337348	65337349	650-08	5	+	Astn2
3442708	3442709	1095-09	5	+	Asxl2	Asxl2
31345119	31345120	1586-09	5	+
7835119	7835120	1486-09	5	-	Birc2	Birc2
17594381	17594382	574-09	5	+	Capza2	Capza2
22046043	22046044	1095-09	5	+	Ccdc178
89391607	89391608	429-09	5	+	Cd226	Cd226
145505256	145505257	833-09	5	+	Cdc73
144521547	144521548	756-09	5	+
86525134	86525135	09-429	5	-	Cltc	Cltc
3600719	3600720	385-09	5	+	Cnot3	Cnot3
12319463	12319464	756-09	5	+	Cobl
105645838	105645839	756-09	5	-	Col6a6	Col6a6
4134158	4134159	385-09	5	+	Crebbp
87846368	87846369	429-09	5	-
78174741	78174742	482-09	5	+	Csf2rb	Csf2rb
71171578	71171579	1586-09	5	-	Csgalnact1	Csgalnact1
128138861	128138862	1093-09	5	-	Csmd2
137635083	137635084	429-09	5	+	Csrp1	Csrp1
75767654	75767655	1586-09	5	+	Ctif
86375940	86375941	320-09	5	-	Dopey1
31092942	31092943	09-448	5	+	Dpysl5	Dpysl5
75437571	75437572	756-09	5	+	Dym	Dym
99536837	99536838	320-09	5	+	Dzip1l	Dzip1l
59734801	59734802	1352-09	5	+	E130308A19Rik	E130308A19Rik
32507703	32507704	1744-09	5	-	Eng
6482517	6482518	833-09	5	+	Epc1
28727323	28727324	833-09	5	-	Erc2
95623601	95623602	1093-09	5	+	Erg
48284814	48284815	09-1095	5	+	Erp44
33798973	33798974	1586-09	5	+	Exoc4	Exoc4
113527008	113527009	1586-09	5	+	Fam104a
3641096	3641097	833-09	5	+	Fam107b	Fam107b
49011973	49011974	833-09	5	-	Fam120a	Fam120a
74850615	74850616	650-08	5	+	Fam214a	Fam214a
36414208	36414209	1797-09	5	-	Kansl3	Kansl3
78490759	78490760	320-09	5	+	Fut8	Fut8
60365672	60365673	320-09	5	-	Galntl6	Galntl6
75213196	75213197	1486-09	5	-	Tuba4a	Tuba4a
91749615	91749616	429-09	5	-	Gm20757	Gm20757
93757310	93757311	09-429	5	-	Gm4792	Gm4792
118442383	118442384	320-09	5	-	Golga4
59738462	59738463	756-09	5	+	Golm1
117872723	117872724	1486-09	5	+	Gpc6	Gpc6
118175129	118175130	385-09	5	-	Gpc6
10562684	10562685	1559-09	5	-	Greb1l
17092942	17092943	756-09	5	+	Arhgap35
44492720	44492721	1093-09	5	+	Gtdc1
76394735	76394736	385-09	5	-	Gtf2f2	Gtf2f2
61763520	61763521	1486-09	5	-	Hk1	Hk1
156944040	156944041	09-1095	5	-	Ier5	Ier5
42685904	42685905	385-09	5	-	Immp2l
4709679	4709680	833-09	5	+	Impad1
105867233	105867234	385-09	5	+
62901334	62901335	1486-09	5	-	Kcnh7	Kcnh7
17798576	17798577	1486-09	5	+	Kdm6a	Kdm6a
64117273	64117274	1095-09	5	-	Klf7	Klf7
64146388	64146389	429-09	5	+	Klf7
24927514	24927515	756-09	5	+	Kmt2c
46152496	46152497	756-09	5	-	Lcorl	Lcorl
193577959	193577960	429-09	5	+	Lpgat1	Lpgat1
55575726	55575727	1586-09	5	-	Nbea	Nbea
34205880	34205881	320-09	5	+	Mapk8
34256829	34256830	1586-09	5	-	Mapk8	Mapk8
60410637	60410638	320-09	5	-	Mbnl1
52780277	52780278	482-09	5	-	Mfsd6	Mfsd6
119744921	119744922	1486-09	5	-	Mga
40686584	40686585	385-09	5	-	Mgam
31325650	31325651	756-09	5	-	Mkln1os	Mkln1os
11847624	11847625	756-09	5	+	Mrpl16	Mrpl16
13572989	13572990	833-09	5	+	Mtmr2	Mtmr2
87873944	87873945	756-09	5	+	Mylk3
51848874	51848875	1797-09	5	-	Myo1b	Myo1b
94648217	94648218	1093-09	5	+
123840023	123840024	320-09	5	-	Nalcn	Nalcn
117674707	117674708	968-09	5	+	Ncapg2	Ncapg2
24897220	24897221	1095-09	5	+	Pnpla7	Pnpla7
51256588	51256589	320-09	5	+
144826154	144826155	320-09	5	+
51084622	51084623	756-09	5	-
41683999	41684000	1486-09	5	+	Oxr1	Oxr1
5239285	5239286	385-09	5	+	Pacs1
17758912	17758913	385-09	5	-	Pcsk5	Pcsk5
156585537	156585538	320-09	5	+
86885493	86885494	756-09	5	-	Pex11a	Pex11a
30838031	30838032	320-09	5	+	Phc3
156098270	156098271	429-09	5	-	Phf20
92091129	92091130	1486-09	5	+	Phf21a	Phf21a
30501637	30501638	1586-09	5	-	Pik3c3
115908534	115908535	650-08	5	-	Pik3r3
64878824	64878825	1352-09	5	-	Plekhm3	Plekhm3
65528928	65528929	1486-09	5	+	Pou1f1	Pou1f1
5086613	5086614	429-09	5	-	Ppl	Ppl
107707103	107707104	320-09	5	-	Ppp1r12a
136720503	136720504	09-429	5	-	Ppp1r12b	Ppp1r12b
101086714	101086715	320-09	5	+	Ppp2r3a
154704145	154704146	1350-09	5	+	Prkcz
32851333	32851334	1486-09	5	-	Pten
77072152	77072153	09-598	5	-	Ptprd	Ptprd
28140398	28140399	1586-09	5	-	Ptprk
130290778	130290779	1486-09	5	+	Pum1	Pum1
51804482	51804483	756-09	5	+	Rad21
68795963	68795964	1486-09	5	+
13621128	13621129	1486-09	5	+	Rasa3
161252779	161252780	650-08	5	-	Rfwd2
86318524	86318525	320-09	5	+	Rps6kb1
123608303	123608304	429-09	5	-	Rragc
62459304	62459305	385-09	5	+	Rufy2	Rufy2
75875590	75875591	1486-09	5	+	Samsn1
32273001	32273002	1486-09	5	-	Sema5a
76953927	76953928	1095-09	5	+	Serp2
109397508	109397509	833-09	5	+	Setd3
66107887	66107888	968-09	5	+	Shisa6
113119943	113119944	320-09	5	-	Slc39a11	Slc39a11
108692053	108692054	1095-09	5	-
28576677	28576678	1586-09	5	+	Snd1	Snd1
8548819	8548820	1486-09	5	-	Sntg1	Sntg1
121094041	121094042	1486-09	5	+	Spon1	Spon1
23418605	23418606	1095-09	5	-	Spopl	Spopl
122604375	122604376	09-598	5	-	Sqrdl
86473351	86473352	1095-09	5	+	Srbd1
194772232	194772233	650-08	5	+	Syt14
9479856	9479857	09-429	5	+	Sytl5	Sytl5
98767960	98767961	1586-09	5	+	Taf1	Taf1
37461404	37461405	1486-09	5	-	Tbrg1	Tbrg1
32406447	32406448	320-09	5	+	Tm4sf19	Tm4sf19
98228209	98228210	1486-09	5	-	Tex11	Tex11
66607035	66607036	385-09	5	-	Tg
134262789	134262790	1486-09	5	+	Tmcc2
51111529	51111530	1352-09	5	-	Tmeff2
75386209	75386210	756-09	5	+	Tmod3
158584014	158584015	1486-09	5	+	Tor3a
114069635	114069636	968-09	5	+
84743639	84743640	1586-09	5	-	Trip12	Trip12
12907688	12907689	385-09	5	-	Triqk
18829875	18829876	833-09	5	+	Trpm6	Trpm6
29678593	29678594	833-09	5	+
122461691	122461692	756-09	5	-	Usp10
147581223	147581224	756-09	5	-	Usp12	Usp12
12314354	12314355	1486-09	5	+	Utrn
109404377	109404378	1586-09	5	+	Vav3	Vav3
35729740	35729741	1486-09	5	+	Vps13b	Vps13b
13172234	13172235	1486-09	5	-	Wtap	Wtap
44864245	44864246	756-09	5	-	Zcchc7
21160402	21160403	1586-09	5	+	Zfp160	Zfp160
165196499	165196500	968-09	5	-
116988124	116988125	09-429	5	-
143934167	143934168	1744-09	5	+
177591687	177591688	650-08	5	+
49846712	49846713	09-429	5	+
37793775	37793776	320-09	5	+
46899188	46899189	1744-09	5	+
52315250	52315251	1486-09	5	+
82947952	82947953	756-09	5	+
17447869	17447870	1486-09	5	+
28091525	28091526	385-09	5	-
39402927	39402928	1586-09	5	-
96939279	96939280	968-09	5	+
15182243	15182244	1486-09	5	-
25838037	25838038	429-09	5	-
44710409	44710410	1586-09	5	-
9137224	9137225	1586-09	5	+
25945641	25945642	756-09	5	+
4882983	4882984	1350-09	5	+
51248558	51248559	1486-09	5	-
87352780	87352781	385-09	5	+
106210288	106210289	833-09	5	-
12119165	12119166	1095-09	5	+
28877404	28877405	1486-09	5	-
56997452	56997453	429-09	5	-
51438086	51438087	429-09	5	+
82956529	82956530	1095-09	5	-
35864389	35864390	385-09	5	+
4394540	4394541	968-09	5	+
45904305	45904306	320-09	5	-
17591143	17591144	1486-09	5	+
14292316	14292317	1486-09	5	+
54124999	54125000	320-09	5	+
109335943	109335944	756-09	5	-
47018711	47018712	1095-09	5	-
56232354	56232355	833-09	5	-
63495747	63495748	1095-09	5	-
67548267	67548268	756-09	5	+
11041566	11041567	1486-09	5	+
65724347	65724348	1486-09	5	-
72041089	72041090	1352-09	5	+
83235946	83235947	574-09	5	-
15473095	15473096	1093-09	5	+
18660346	18660347	09-114	5	+
27649334	27649335	09-598	5	-
38270467	38270468	320-09	5	+
91307887	91307888	574-09	5	+
97118924	97118925	09-1095	5	-
102062964	102062965	1095-09	5	+
134128204	134128205	320-09	5	+
134511459	134511460	385-09	5	+
56788256	56788257	09-1095	5	+
42943486	42943487	320-09	5	-
76180334	76180335	833-09	5	+
18861103	18861104	320-09	5	-
61708674	61708675	09-114	5	-
101568117	101568118	1486-09	5	+
13047775	13047776	756-09	5	-
17417207	17417208	429-09	5	-
23725701	23725702	1095-09	5	+
29921510	29921511	320-09	5	+
33058898	33058899	320-09	5	-
37809236	37809237	385-09	5	-
46463122	46463123	320-09	5	+
52398364	52398365	650-08	5	+
52621660	52621661	574-09	5	-
5813365	5813366	429-09	5	+
5990898	5990899	385-09	5	+
73824239	73824240	756-09	5	+
79599075	79599076	756-09	5	+
82207756	82207757	1486-09	5	+
87419071	87419072	1486-09	5	-
89160118	89160119	756-09	5	-
93194462	93194463	1486-09	5	+
131810252	131810253	1486-09	5	+
163868109	163868110	429-09	5	-
43046192	43046193	1586-09	5	+
90032480	90032481	833-09	5	-
3439279	3439280	320-09	4	-	Asxl2
132552181	132552182	756-09	4	+	1110034G24Rik	1110034G24Rik
91211479	91211480	1095-09	4	-	1110051M20Rik	1110051M20Rik
78538836	78538837	1586-09	4	-	2610008E11Rik	2610008E11Rik
113044189	113044190	1744-09	4	+	2610035D17Rik
41379587	41379588	1352-09	4	-
28627818	28627819	320-09	4	+	2610307P16Rik
13607903	13607904	968-09	4	-	4930539N22Rik|Ralyl	4930539N22Rik
62172348	62172349	1352-09	4	-	Alad	Alad
128736486	128736487	09-114	4	+
6100690	6100691	385-09	4	+	5430428K19Rik|Shroom4	Shroom4
3366935	3366936	756-09	4	+	8430429K09Rik	8430429K09Rik
86579361	86579362	385-09	4	-	Me1	Me1
119248403	119248404	1486-09	4	-	Myd88	Myd88
22936665	22936666	1486-09	4	-	Acbd5
96780232	96780233	968-09	4	+	Pxylp1
20008708	20008709	833-09	4	+	Actr2
69155146	69155147	1744-09	4	+
86047821	86047822	09-429	4	+	Adamtsl1	Adamtsl1
91742763	91742764	1586-09	4	+	Agap1	Agap1
95277419	95277420	756-09	4	+	Ap3b1	Ap3b1
114818510	114818511	1095-09	4	+	Arl15	Arl15
154619727	154619728	09-429	4	-	Arpc5
74898106	74898107	1586-09	4	+	Arpp19	Arpp19
50484622	50484623	320-09	4	+	Ascc3	Ascc3
98405358	98405359	1486-09	4	+	Atp2b1	Atp2b1
84834392	84834393	1586-09	4	-	Atp5j	Atp5j
60711493	60711494	1486-09	4	-
25481586	25481587	385-09	4	-	AW554918
56002141	56002142	1744-09	4	+	Baz1a
23139121	23139122	320-09	4	-	Bmper
160238876	160238877	756-09	4	-	Brinp2	Brinp2
43929336	43929337	385-09	4	-	C1qtnf7
75126257	75126258	09-872	4	-	Cabin1	Cabin1
31147396	31147397	385-09	4	+	Cacna1d
5583712	5583713	833-09	4	-	Camk1d	Camk1d
11530015	11530016	09-1095	4	-	Cars2	Cars2
100813252	100813253	1095-09	4	+	Cd101
23134120	23134121	756-09	4	+	Cdh18	Cdh18
126491501	126491502	833-09	4	-
108917922	108917923	1486-09	4	-	Clpb
97721973	97721974	1486-09	4	-	Clstn2	Clstn2
90644306	90644307	429-09	4	-	Cnep1r1
115943328	115943329	1095-09	4	-	Cnot2	Cnot2
10203454	10203455	385-09	4	+	Cntn5
9770677	9770678	429-09	4	-	Cntn5	Cntn5
102376690	102376691	429-09	4	-	Cntnap5b
52815772	52815773	833-09	4	-	Cog6	Cog6
108843356	108843357	756-09	4	-	Uqcrc1
75667425	75667426	756-09	4	+	Cpb2	Cpb2
29317961	29317962	429-09	4	+	Cpne5
21279724	21279725	756-09	4	+	Itgb1bp1
104451388	104451389	09-872	4	+	Cstf3	Cstf3
96003187	96003188	385-09	4	+	Cyp2j11
83806269	83806270	833-09	4	+	D930015E06Rik
52980603	52980604	320-09	4	+	Ddx10
144502283	144502284	1486-09	4	+	Dhrs3	Dhrs3
126751281	126751282	385-09	4	+	Diap2	Diap2
21297590	21297591	1586-09	4	-	Psmc2
41442180	41442181	429-09	4	-	Dock4
86360377	86360378	650-08	4	-
125727651	125727652	1093-09	4	-	Dpp10	Dpp10
125906267	125906268	756-09	4	+	Dpp10
118513527	118513528	756-09	4	+	Dpyd	Dpyd
94723664	94723665	968-09	4	-	Dscr3	Dscr3
34119112	34119113	482-09	4	-	Dst
114605268	114605269	385-09	4	+	Dync1li1	Dync1li1
59695204	59695205	1586-09	4	+	E130308A19Rik	E130308A19Rik
29614512	29614513	1586-09	4	-	Ech1
91079295	91079296	574-09	4	+
183871474	183871475	1744-09	4	+	Enah
108959951	108959952	756-09	4	+	Eps15	Eps15
95658138	95658139	09-1095	4	-	Erg	Erg
32510063	32510064	09-448	4	+	Ets1	Ets1
32524593	32524594	1586-09	4	+	Ets1	Ets1
32548479	32548480	320-09	4	+	Ets1	Ets1
87336067	87336068	1586-09	4	+	Etv3	Etv3
98882330	98882331	756-09	4	-
63835045	63835046	756-09	4	+	Fam49b
66166317	66166318	833-09	4	-	Fkbp3	Fkbp3
85426103	85426104	1486-09	4	+	Fbxo41
119538646	119538647	1486-09	4	+	Fgf10	Fgf10
11263922	11263923	1586-09	4	+	Fhit
74978238	74978239	09-114	4	+	Fip1l1	Fip1l1
122268789	122268790	968-09	4	-	Fnbp1l	Fnbp1l
27569425	27569426	320-09	4	-	Fndc3b	Fndc3b
52077365	52077366	1093-09	4	+	Foxo1	Foxo1
82658092	82658093	320-09	4	+	Frem1
73696630	73696631	1486-09	4	-	Frmd3
24760372	24760373	1095-09	4	+	Galnt11	Galnt11
57749571	57749572	1486-09	4	+	Gcc2	Gcc2
76066239	76066240	1486-09	4	-
3450867	3450868	09-429	4	-	Ghr	Ghr
89252040	89252041	09-833	4	+	Gigyf2	Gigyf2
63314075	63314076	1095-09	4	+
182265052	182265053	1486-09	4	-	Itpkb
4619232	4619233	385-09	4	+	Gria4
4673372	4673373	09-429	4	+	Gria4
61094743	61094744	756-09	4	-	Grk5
3701942	3701943	320-09	4	-	Gucy1a2
3726356	3726357	833-09	4	-	Gucy1a2
135893423	135893424	1095-09	4	-	Hip1	Hip1
42235932	42235933	1095-09	4	-	Hivep1
90200901	90200902	1095-09	4	+	Hlf
54751369	54751370	756-09	4	+	Ireb2	Ireb2
65238994	65238995	1351-09	4	-	Pikfyve
88175089	88175090	756-09	4	+
124941978	124941979	320-09	4	+
112204910	112204911	320-09	4	-	Ist1	Ist1
120421010	120421011	756-09	4	+	Itgb8
146436705	146436706	756-09	4	+	Itpr2
44831198	44831199	756-09	4	-	Jarid2
95138521	95138522	1486-09	4	+	Kat7
88563222	88563223	1586-09	4	+	Kbtbd12
151816840	151816841	1586-09	4	-	Kcnab2	Kcnab2
108634740	108634741	320-09	4	+	Kdsr
97649443	97649444	968-09	4	-	Kifc3	Kifc3
55554174	55554175	1486-09	4	-
36000182	36000183	968-09	4	+	Kpna1	Kpna1
26026117	26026118	1486-09	4	-	L3mbtl3	L3mbtl3
103674462	103674463	1486-09	4	-	Lgmn	Lgmn
57858334	57858335	320-09	4	-	Lims1
35900590	35900591	1095-09	4	-	Lingo2	Lingo2
115701143	115701144	1486-09	4	-	Llgl2
70043290	70043291	1486-09	4	-	Loxl2
24474561	24474562	1586-09	4	-	Lpp
24670281	24670282	385-09	4	-	Lpp
77356612	77356613	1486-09	4	+	Lrrc1
91526139	91526140	1486-09	4	-	Lrrk2
48877915	48877916	756-09	4	-	Mbd5
24632787	24632788	1486-09	4	-	Med23
75037939	75037940	833-09	4	+	Med26
40476348	40476349	1586-09	4	+	Mettl24	Mettl24
119743993	119743994	320-09	4	+	Mga	Mga
41324992	41324993	1586-09	4	+	Mir8115|Oxr1	Oxr1
4480605	4480606	833-09	4	-	Mtmr3	Mtmr3
60305400	60305401	385-09	4	-	Myo15
59750442	59750443	482-09	4	+	Myo9a	Myo9a
81304203	81304204	09-1095	4	+	Ncam2	Ncam2
165863288	165863289	320-09	4	+	Ncoa3	Ncoa3
72542720	72542721	756-09	4	-	Nedd4
79365705	79365706	385-09	4	-	Nf1
31205171	31205172	756-09	4	-	Nfrkb
19134995	19134996	385-09	4	+
95935802	95935803	1486-09	4	+	Ophn1
56025897	56025898	833-09	4	+	Pcnp
73061945	73061946	09-448	4	-	Pcsk6
11489678	11489679	320-09	4	+
82823352	82823353	385-09	4	-	Phip	Phip
17304563	17304564	968-09	4	-	Pi4ka	Pi4ka
94673427	94673428	756-09	4	-	Pogz
122209714	122209715	756-09	4	-	Ppm1h
17091177	17091178	09-429	4	+	Ppp3r1	Ppp3r1
31108630	31108631	320-09	4	+
65771462	65771463	1486-09	4	+	Prdm5	Prdm5
129776740	129776741	756-09	4	+	Prkcb	Prkcb
30843959	30843960	833-09	4	-	Prkg1	Prkg1
88079189	88079190	833-09	4	-	Hacd4	Hacd4
139998062	139998063	1586-09	4	+	Ptprc
137298037	137298038	756-09	4	-	Ptpro
130233769	130233770	1486-09	4	+	Pum1	Pum1
62010851	62010852	833-09	4	+	Pvt1	Pvt1
130017070	130017071	09-1095	4	+	R3hdm1	R3hdm1
130063268	130063269	1486-09	4	+	R3hdm1	R3hdm1
162203474	162203475	1351-09	4	-	Rabgap1l	Rabgap1l
10614689	10614690	1586-09	4	+	Rai14
13619601	13619602	1486-09	4	-	Rasa3	Rasa3
92878613	92878614	756-09	4	+	Rasgrf2
7319761	7319762	09-833	4	+	Rbfox1	Rbfox1
116801553	116801554	1486-09	4	-	Rbms3	Rbms3
117198654	117198655	1486-09	4	+	Rbms3
34505190	34505191	1586-09	4	-	Reep5	Reep5
82319916	82319917	1351-09	4	+	Rhbdd1	Rhbdd1
123485365	123485366	756-09	4	-	Rhbdl2
22713310	22713311	968-09	4	+	Rims1
10119532	10119533	1586-09	4	-	Rock1	Rock1
100216914	100216915	1586-09	4	-	Rybp	Rybp
25964446	25964447	968-09	4	-	Samd3
31851093	31851094	320-09	4	+	Sap130	Sap130
130744281	130744282	1586-09	4	+	Tyw1	Tyw1
85962091	85962092	385-09	4	-	Scoc	Scoc
110491087	110491088	09-429	4	+	Setd2	Setd2
62792721	62792722	1486-09	4	+	Sirt1
113673945	113673946	320-09	4	-	Skiv2l2	Skiv2l2
113272004	113272005	756-09	4	-	Slc39a11	Slc39a11
73848881	73848882	1486-09	4	+
94680856	94680857	1486-09	4	-	Slc9a9
26707906	26707907	385-09	4	-	Smarca2
122040851	122040852	833-09	4	+	Snrk	Snrk
109532648	109532649	320-09	4	+	Sntb2	Sntb2
47163605	47163606	833-09	4	-	Snx25	Snx25
59814289	59814290	574-09	4	-
15986339	15986340	429-09	4	+	Spidr
16021073	16021074	756-09	4	-	Spidr	Spidr
69645469	69645470	756-09	4	+	Sptssb
86428026	86428027	756-09	4	-	Srbd1	Srbd1
121250012	121250013	385-09	4	-	Srgap1	Srgap1
100575694	100575695	574-09	4	-	Stag1
146704976	146704977	756-09	4	+	Stk38l	Stk38l
38445826	38445827	650-08	4	+	Stx18	Stx18
90991955	90991956	1486-09	4	-	Synj1	Synj1
59459627	59459628	756-09	4	-	Tanc1
132812218	132812219	320-09	4	-
71784514	71784515	09-429	4	-	Tcf12	Tcf12
71900975	71900976	756-09	4	-	Tcf12	Tcf12
82700836	82700837	09-1095	4	-	Tcf20	Tcf20
32406451	32406452	320-09	4	+	Tm4sf19	Tm4sf19
47369464	47369465	385-09	4	-	Tgfbr1
116032849	116032850	320-09	4	-	Tgfbr2	Tgfbr2
116050655	116050656	320-09	4	-	Tgfbr2	Tgfbr2
70658714	70658715	1486-09	4	+	Tlk1
98033380	98033381	756-09	4	-	Tm2d1	Tm2d1
51195480	51195481	1744-09	4	-	Tmeff2
139164322	139164323	756-09	4	-	Tmem164
99680161	99680162	756-09	4	+	Tnpo1
73982469	73982470	833-09	4	-	Tns1	Tns1
101626505	101626506	1586-09	4	-	Ttc7b	Ttc7b
86211558	86211559	385-09	4	-	Ube2cbp	Ube2cbp
73690825	73690826	1486-09	4	-	Unc13c	Unc13c
88216495	88216496	1095-09	4	-	Utp20	Utp20
66061345	66061346	385-09	4	+	Veph1
35557078	35557079	650-08	4	-	Wapal
110119789	110119790	833-09	4	-	Wars	Wars
35757756	35757757	1095-09	4	-	Wwc1	Wwc1
133297368	133297369	756-09	4	+	Xpo6
86348320	86348321	1095-09	4	-	Ylpm1
48614322	48614323	833-09	4	-	Zbtb16	Zbtb16
91336705	91336706	09-448	4	+	Zfx
100883336	100883337	650-08	4	+
145867916	145867917	09-114	4	-
150163822	150163823	1351-09	4	-
157691384	157691385	1744-09	4	+
171815732	171815733	1559-09	4	+
31920543	31920544	650-08	4	-
34573753	34573754	1351-09	4	+
35301807	35301808	09-429	4	+
43730441	43730442	1486-09	4	-
52811804	52811805	574-09	4	+
56064454	56064455	482-09	4	-
60917293	60917294	756-09	4	+
63951672	63951673	1486-09	4	-
91332250	91332251	1093-09	4	-
103447032	103447033	385-09	4	+
24026062	24026063	1486-09	4	+
39607945	39607946	385-09	4	-
16245163	16245164	1559-09	4	-
25397970	25397971	1486-09	4	+
39712356	39712357	320-09	4	+
40083196	40083197	1586-09	4	-
45070049	45070050	1486-09	4	+
45174291	45174292	1486-09	4	+
49033793	49033794	833-09	4	-
9898273	9898274	1586-09	4	-
40029714	40029715	1486-09	4	+
48500498	48500499	1586-09	4	-
102612147	102612148	385-09	4	+
102991839	102991840	1586-09	4	-
114218719	114218720	09-598	4	-
3728480	3728481	1586-09	4	+
102649271	102649272	1486-09	4	+
26198816	26198817	385-09	4	+
39153517	39153518	385-09	4	+
62092153	62092154	1486-09	4	+
96253736	96253737	1486-09	4	+
99084730	99084731	756-09	4	-
16256240	16256241	756-09	4	-
44183074	44183075	1486-09	4	-
46709719	46709720	1586-09	4	-
3246603	3246604	833-09	4	+
51292930	51292931	1486-09	4	-
61940492	61940493	385-09	4	+
65390776	65390777	429-09	4	+
86854746	86854747	833-09	4	-
92877438	92877439	756-09	4	-
16023790	16023791	1486-09	4	+
41734353	41734354	1486-09	4	+
90430624	90430625	1095-09	4	-
91621739	91621740	09-429	4	-
9473066	9473067	09-429	4	+
13841609	13841610	320-09	4	+
56231917	56231918	1586-09	4	+
69859942	69859943	385-09	4	+
7809205	7809206	756-09	4	+
54534419	54534420	1486-09	4	+
132868957	132868958	1486-09	4	-
25039812	25039813	756-09	4	+
77186667	77186668	385-09	4	+
100322988	100322989	1586-09	4	-
103815315	103815316	1586-09	4	+
10979745	10979746	1486-09	4	-
127117392	127117393	756-09	4	-
147506954	147506955	756-09	4	-
149979488	149979489	429-09	4	+
59870766	59870767	1486-09	4	+
59990693	59990694	756-09	4	-
67362563	67362564	385-09	4	+
23599668	23599669	09-429	4	-
28723809	28723810	1486-09	4	-
37147874	37147875	1744-09	4	-
4735464	4735465	09-429	4	+
49052200	49052201	968-09	4	-
49958057	49958058	1350-09	4	+
57744418	57744419	833-09	4	-	Pakap
63182138	63182139	320-09	4	+
72880728	72880729	650-08	4	-
90786441	90786442	1744-09	4	+
91796560	91796561	1352-09	4	+
92128330	92128331	09-114	4	+
97118924	97118925	09-448	4	+
100977060	100977061	833-09	4	+
122627785	122627786	1586-09	4	+
133361643	133361644	1486-09	4	+
29239840	29239841	650-08	4	+
81012512	81012513	756-09	4	-
83275897	83275898	1095-09	4	+
102484614	102484615	09-448	4	-
110270190	110270191	833-09	4	+
138262517	138262518	1586-09	4	-
31731060	31731061	1486-09	4	-
56555435	56555436	833-09	4	+
71077773	71077774	429-09	4	+
106756958	106756959	756-09	4	-
130421415	130421416	1486-09	4	+
48628002	48628003	09-1095	4	-
68474010	68474011	429-09	4	-
92402833	92402834	320-09	4	+
93207310	93207311	429-09	4	-
105749899	105749900	09-1095	4	-
30395601	30395602	1486-09	4	-
33758850	33758851	1586-09	4	+
51363792	51363793	1586-09	4	-
92896917	92896918	1586-09	4	-
103773894	103773895	1586-09	4	+
104053092	104053093	385-09	4	+
112981935	112981936	1095-09	4	-
115616037	115616038	1586-09	4	+
13126537	13126538	320-09	4	+
19221876	19221877	09-429	4	-
21509107	21509108	429-09	4	-
25135206	25135207	1486-09	4	+
30667854	30667855	1486-09	4	+
36418225	36418226	09-1095	4	-
50840230	50840231	833-09	4	+
52667419	52667420	09-429	4	-
6537500	6537501	385-09	4	+
7530476	7530477	756-09	4	-
76677580	76677581	320-09	4	-
76686490	76686491	1095-09	4	-
81591673	81591674	833-09	4	+
82137205	82137206	1486-09	4	+
84587088	84587089	1744-09	4	+
84919997	84919998	1486-09	4	-
85042124	85042125	1486-09	4	-
85986770	85986771	1486-09	4	-
87507688	87507689	320-09	4	+
91795875	91795876	756-09	4	-
91822362	91822363	320-09	4	-
92741573	92741574	1586-09	4	-
10319508	10319509	756-09	4	+
13632349	13632350	1095-09	4	-
146678934	146678935	429-09	4	-
72730999	72731000	320-09	4	-
105072629	105072630	1486-09	3	+	Them7	Them7
64278522	64278523	756-09	3	-	0610040J01Rik
99084344	99084345	385-09	3	-	1700007G11Rik
173045988	173045989	1486-09	3	+
104665984	104665985	833-09	3	+	1700024P16Rik	1700024P16Rik
44632822	44632823	385-09	3	+	2310069G16Rik	2310069G16Rik
108383822	108383823	833-09	3	+	Zfyve9
117734794	117734795	1744-09	3	-	4930412B13Rik|Gm13986	Gm13986
16086800	16086801	756-09	3	-
53255469	53255470	09-429	3	-
36905552	36905553	429-09	3	-	Golgb1
35088913	35088914	1586-09	3	+	4933422A05Rik	4933422A05Rik
67110552	67110553	1095-09	3	+	4933433G19Rik
59322713	59322714	1586-09	3	+	4933439C10Rik	4933439C10Rik
108620367	108620368	756-09	3	+	8030443G20Rik
138322054	138322055	1744-09	3	-	Ddx59
135411831	135411832	1486-09	3	-
78342222	78342223	09-833	3	-	A830082K12Rik
31071080	31071081	756-09	3	-	Lincpint	Lincpint
14411861	14411862	320-09	3	+	Abcc1	Abcc1
86499790	86499791	385-09	3	-	Abhd2
56750473	56750474	1352-09	3	+
33670370	33670371	756-09	3	-	Adamts10
53206182	53206183	1586-09	3	+	Aff4	Aff4
83378398	83378399	320-09	3	-	Agbl1
181718084	181718085	1586-09	3	-	Ahctf1	Ahctf1
132580031	132580032	1586-09	3	-	Ahdc1
7433343	7433344	1586-09	3	-	AI846148	AI846148
12993249	12993250	756-09	3	-	Airn
101428005	101428006	09-114	3	+	Ak6	Ak6
52415242	52415243	833-09	3	+	Alcam
72554833	72554834	09-833	3	-	Alk	Alk
72554833	72554834	650-08	3	+	Alk
122891751	122891752	320-09	3	+	Anapc7	Anapc7
125518389	125518390	1586-09	3	+	Ankrd11
46485107	46485108	756-09	3	+	Anp32b	Anp32b
79657462	79657463	09-448	3	-	Ap1s3	Ap1s3
63102017	63102018	756-09	3	-	Arap2	Arap2
44566497	44566498	320-09	3	-	Arcn1	Arcn1
80005628	80005629	756-09	3	-	Arhgap10	Arhgap10
6058981	6058982	968-09	3	-	Arhgap12	Arhgap12
20894866	20894867	09-429	3	+
32006788	32006789	1486-09	3	+	Arhgap32	Arhgap32
9037599	9037600	385-09	3	+	Arhgap42
43224472	43224473	650-08	3	-	Arhgef5
54606337	54606338	1486-09	3	+
11815072	11815073	09-429	3	+	Arhgef7	Arhgef7
96111052	96111053	1744-09	3	-
108744637	108744638	1586-09	3	+	Arl8b	Arl8b
99448586	99448587	756-09	3	-	Armc8	Armc8
30879959	30879960	1486-09	3	-	Asb3|Chac2	Chac2
86480889	86480890	574-09	3	+	Asf1b	Asf1b
22488727	22488728	833-09	3	-
105375201	105375202	756-09	3	-	Atp2c1	Atp2c1
38035452	38035453	09-429	3	-	Atp6v0a4	Atp6v0a4
71630734	71630735	1744-09	3	-	Atp6v1b2
45985187	45985188	1586-09	3	-	Atxn1	Atxn1
33828276	33828277	09-1095	3	+	Zfp451
106735530	106735531	1744-09	3	-	Bean1
84000737	84000738	650-08	3	-	Bnc2	Bnc2
151343738	151343739	1586-09	3	-	Brca2
86385748	86385749	1586-09	3	-
98675810	98675811	320-09	3	-	Casc3
52159364	52159365	756-09	3	+	Cblb	Cblb
66378330	66378331	385-09	3	+	Ccbe1
29369892	29369893	968-09	3	-	Ccdc136
174469477	174469478	650-08	3	+	Cfap45	Cfap45
117543052	117543053	968-09	3	+	Ccdc24
123925824	123925825	320-09	3	+
136888946	136888947	1095-09	3	-	Cdc42	Cdc42
32977179	32977180	833-09	3	-	Chchd3	Chchd3
6770859	6770860	1486-09	3	+	Clcn5
114625403	114625404	1586-09	3	+	Dync1li1	Dync1li1
181462033	181462034	756-09	3	+	Tfb2m
9734898	9734899	320-09	3	+	Cntn5
9942333	9942334	09-598	3	+	Cntn5
45837434	45837435	833-09	3	+	Cntnap2	Cntnap2
46623462	46623463	1486-09	3	+	Cntnap2	Cntnap2
118450684	118450685	1486-09	3	-	Cntnap5a
58066561	58066562	833-09	3	+	Cntnap5c	Cntnap5c
75650406	75650407	385-09	3	-	Cpb2
33081063	33081064	320-09	3	-	Cpq
67261299	67261300	1586-09	3	+	Cps1	Cps1
30260282	30260283	756-09	3	+	Crat
70938540	70938541	833-09	3	+	Csgalnact1
152081174	152081175	1486-09	3	-	Csnk2a1
64120973	64120974	756-09	3	-	Ctnna3
36011609	36011610	320-09	3	+	Cxxc5	Cxxc5
44556878	44556879	1586-09	3	-	Dcp2
28707167	28707168	756-09	3	+	Ddx31	Ddx31
55645341	55645342	1586-09	3	+	Fam193b
44436093	44436094	320-09	3	-	Ddx6
18215737	18215738	756-09	3	-
37761893	37761894	320-09	3	+	Dennd1a
37817599	37817600	1744-09	3	+	Dennd1a
109129040	109129041	09-429	3	-	Depdc1b
6507583	6507584	320-09	3	-	Dgkk
87347117	87347118	756-09	3	+	Diap3
99179231	99179232	833-09	3	+	Dlg2	Dlg2
81078753	81078754	1486-09	3	+	Dmd	Dmd
50025853	50025854	320-09	3	+	Dmxl1	Dmxl1
151875850	151875851	574-09	3	-	Fubp1
25218223	25218224	833-09	3	-	Dock8
25231913	25231914	833-09	3	-	Dock8
86411629	86411630	1586-09	3	-	Dopey1
86366880	86366881	1486-09	3	+	Dopey1	Dopey1
23800497	23800498	09-448	3	+	Dtna	Dtna
94904979	94904980	09-429	3	+	Dyrk1a	Dyrk1a
99552641	99552642	1486-09	3	-	Dzip1l
97254971	97254972	756-09	3	+	Eda	Eda
29317003	29317004	1586-09	3	+	Egfem1	Egfem1
119932315	119932316	756-09	3	-	Ehd4	Ehd4
91013179	91013180	1351-09	3	+	Elavl2
85557850	85557851	872-09	3	-	Elmsan1	Elmsan1
136244673	136244674	482-09	3	+	Ephb2
94354472	94354473	833-09	3	-	Epn3	Epn3
7506880	7506881	1586-09	3	-
95697179	95697180	09-429	3	+	Erg
189795068	189795069	09-429	3	+	Esrrg	Esrrg
108312476	108312477	320-09	3	-
14270443	14270444	320-09	3	-	Eya1	Eya1
15534736	15534737	833-09	3	+	Fam120b	Fam120b
36711595	36711596	09-429	3	-	Fam178b	Fam178b
36711595	36711596	09-429	3	+	Fam178b
34770492	34770493	1486-09	3	+	Fam193a	Fam193a
76382325	76382326	09-1095	3	-	Fam83b	Fam83b
22357079	22357080	320-09	3	+	Fbxl4	Fbxl4
26663873	26663874	429-09	3	+	Fbxl7
55060399	55060400	1095-09	3	+	Fbxo22	Fbxo22
109098915	109098916	1486-09	3	+
99540469	99540470	1586-09	3	-	Fcho2	Fcho2
91996772	91996773	756-09	3	-	Fgd5
10911164	10911165	320-09	3	+	Fhit
28572667	28572668	1586-09	3	+	Fkbp5
32301568	32301569	833-09	3	-	Fli1	Fli1
32337814	32337815	429-09	3	-	Fli1	Fli1
77856412	77856413	833-09	3	+	Flot2	Flot2
73066981	73066982	1797-09	3	-	Fndc3a	Fndc3a
15140743	15140744	1586-09	3	-	Foxp2
164672546	164672547	1486-09	3	+	Frmpd4
39143710	39143711	385-09	3	-	Fyn
42375482	42375483	1486-09	3	+	Gabrb2	Gabrb2
64219640	64219641	833-09	3	+	Gabrg3
60591335	60591336	385-09	3	-	Galntl6	Galntl6
70365158	70365159	1486-09	3	+	Gbe1	Gbe1
46257545	46257546	833-09	3	+	Gbf1	Gbf1
89282363	89282364	320-09	3	-	Gigyf2
161671185	161671186	1351-09	3	+	Glra2
101540634	101540635	385-09	3	+	Gm15679	Gm15679
89798984	89798985	320-09	3	-
124977287	124977288	833-09	3	+
37839485	37839486	650-08	3	-	Gm20755
49056414	49056415	1486-09	3	+
137972815	137972816	1486-09	3	+	Gnb2
38901972	38901973	1352-09	3	-	Golga1	Golga1
116612039	116612040	1586-09	3	+	Gpc5	Gpc5
118371592	118371593	833-09	3	+	Gpc6	Gpc6
42805645	42805646	385-09	3	+	Adgrf4
106382498	106382499	09-448	3	-	Rrp9
156848021	156848022	1586-09	3	-	Adgrg2
11895290	11895291	09-598	3	-	Grb10	Grb10
80615806	80615807	09-114	3	-
142434205	142434206	756-09	3	+	Gtf2b	Gtf2b
93838986	93838987	09-429	3	+	Hdac4
95372772	95372773	320-09	3	+	Hdlbp
17637269	17637270	833-09	3	-	Heca	Heca
16118480	16118481	385-09	3	-	Hgf
52713794	52713795	968-09	3	-	Hnrnpc	Hnrnpc
36117513	36117514	09-429	3	+
104422873	104422874	320-09	3	+	Hsd17b11
123028931	123028932	756-09	3	+	Ift81
90815986	90815987	09-833	3	+	Il16
109172548	109172549	1095-09	3	-	Rnf121	Rnf121
11146562	11146563	1586-09	3	-	Ints8	Ints8
182326323	182326324	756-09	3	+	Itpkb	Itpkb
91796620	91796621	1744-09	3	-	Itsn1
100865574	100865575	09-429	3	+	Jak1
66677129	66677130	1586-09	3	+	Jmjd1c	Jmjd1c
5614500	5614501	429-09	3	-
62584944	62584945	833-09	3	-	Kcnh7	Kcnh7
72387221	72387222	968-09	3	+
62221142	62221143	1586-09	3	+	Trim13	Trim13
142158731	142158732	1586-09	3	+	Kcnt2	Kcnt2
136145976	136145977	1744-09	3	-	Kdm1a	Kdm1a
32623927	32623928	968-09	3	+	Khdrbs2	Khdrbs2
9141008	9141009	385-09	3	+	Larp4b	Larp4b
142443391	142443392	09-598	3	-	Ldhb	Ldhb
68120016	68120017	1744-09	3	+	Ldlrad4	Ldlrad4
125412898	125412899	320-09	3	+	Lrig3	Lrig3
111068990	111068991	1586-09	3	-	Lrrfip2
73509994	73509995	1586-09	3	+	Lrrk1
89503689	89503690	1586-09	3	-	Mageb18	Mageb18
93994038	93994039	385-09	3	+	Magi1
105952311	105952312	756-09	3	-	Map3k3
109841744	109841745	320-09	3	+	Map4	Map4
109924281	109924282	833-09	3	+	Map4	Map4
109964348	109964349	385-09	3	-	Map4
186637178	186637179	756-09	3	+	Marc2
186619894	186619895	1586-09	3	+	Marc1
13062148	13062149	756-09	3	+
48955528	48955529	1486-09	3	-	Mbd5
9921520	9921521	756-09	3	+	Mcmdc2	Mcmdc2
110941817	110941818	1486-09	3	+
139851673	139851674	09-833	3	+
56570272	56570273	650-08	3	+	Ptprs
119985989	119985990	385-09	3	+	Wnk1
72290807	72290808	1586-09	3	+	Mns1	Mns1
35113372	35113373	1586-09	3	-
122448323	122448324	756-09	3	-	Mon2	Mon2
175213534	175213535	320-09	3	-
88227942	88227943	756-09	3	+	Msi2
148834362	148834363	320-09	3	+	Mtus2	Mtus2
75069559	75069560	968-09	3	+	Myo5a	Myo5a
30277946	30277947	1586-09	3	-	Myt1l
69237564	69237565	833-09	3	+
100425016	100425017	1586-09	3	+	Nck1
62149094	62149095	1351-09	3	+	Ncor1
79157753	79157754	385-09	3	+	Nf1	Nf1
79269517	79269518	1486-09	3	+	Nf1	Nf1
97426803	97426804	09-598	3	+	Nfia	Nfia
32426007	32426008	1486-09	3	+	Nkain2
26078968	26078969	429-09	3	-	Nlgn1	Nlgn1
27206649	27206650	1744-09	3	+
30068040	30068041	385-09	3	-	Nrf1
76305685	76305686	1486-09	3	-	Nrip1	Nrip1
60840140	60840141	09-448	3	+	Nupl1
130386525	130386526	320-09	3	-	Nupr1l
86870412	86870413	09-1095	3	-
73772526	73772527	1486-09	3	-
39476574	39476575	1586-09	3	+
27640937	27640938	1486-09	3	+	Opcml	Opcml
108822867	108822868	385-09	3	-	Osbpl9	Osbpl9
70754393	70754394	09-833	3	+	Otud7a	Otud7a
163836671	163836672	385-09	3	+	Ywhab	Ywhab
9846317	9846318	385-09	3	+
99755364	99755365	1486-09	3	-	Pam	Pam
99876831	99876832	1486-09	3	-	Pam	Pam
129624810	129624811	1486-09	3	+	Pard3	Pard3
62051639	62051640	1095-09	3	+	Pard3b	Pard3b
33051312	33051313	833-09	3	+	Parg	Parg
11460545	11460546	1586-09	3	-	Park2
20290580	20290581	1586-09	3	-	Parl	Parl
93461090	93461091	1095-09	3	+	Pcdh9
38203923	38203924	1586-09	3	-
82864168	82864169	1095-09	3	+	Phip
88456853	88456854	833-09	3	+	Phkb	Phkb
88575405	88575406	1486-09	3	+	Phkb	Phkb
123525135	123525136	429-09	3	-	Pik3c2a	Pik3c2a
142479394	142479395	385-09	3	-	Pkn2	Pkn2
29928699	29928700	1486-09	3	+
151787712	151787713	385-09	3	-	Pla2g4a	Pla2g4a
178202391	178202392	833-09	3	+	Pld5
135189510	135189511	756-09	3	+	Plekha6	Plekha6
123277583	123277584	756-09	3	-	Plekha7	Plekha7
16368569	16368570	833-09	3	+	Plxdc2	Plxdc2
33283210	33283211	1744-09	3	-
94682114	94682115	1486-09	3	-	Pogz
181594505	181594506	1486-09	3	+
136387337	136387338	833-09	3	-	Ppp3ca
109520689	109520690	650-08	3	-	Prkar1a
182190114	182190115	756-09	3	+
83127042	83127043	09-1095	3	+	Psip1
76097260	76097261	1486-09	3	-	Ptprd	Ptprd
77408949	77408950	09-429	3	-	Ptprd	Ptprd
67480624	67480625	833-09	3	-	Ptprm	Ptprm
66027880	66027881	833-09	3	-	Ptx3|Veph1	Veph1
74698137	74698138	756-09	3	-	Rab8a
112641037	112641038	385-09	3	-	Rad18	Rad18
74303668	74303669	1744-09	3	+	Rap1gap2
78890555	78890556	429-09	3	+	Rapgef2
78945495	78945496	429-09	3	+	Rapgef2
54482444	54482445	1352-09	3	+	Rapgef6	Rapgef6
17440685	17440686	09-872	3	-	Rarb	Rarb
144383792	144383793	429-09	3	+	Sec23b	Sec23b
28724171	28724172	1586-09	3	-	Rbm33
116521735	116521736	385-09	3	-	Rbms3	Rbms3
162825811	162825812	385-09	3	+
112297306	112297307	1586-09	3	-	Rcor1
161229353	161229354	320-09	3	-	Rfwd2
72407923	72407924	320-09	3	-	Rfx7
76056921	76056922	09-429	3	-	Rhobtb3	Rhobtb3
39413254	39413255	1486-09	3	-	Rims2
109136083	109136084	1744-09	3	-	Rnf11	Rnf11
33390166	33390167	1093-09	3	-
69183833	69183834	756-09	3	+	Rora	Rora
123591016	123591017	756-09	3	-
44876876	44876877	1586-09	3	+	Runx2
31825204	31825205	833-09	3	+	Sap130	Sap130
40087519	40087520	1093-09	3	-	Scn3b
79947094	79947095	320-09	3	-	Senp6
79962793	79962794	1093-09	3	-	Senp6
79316939	79316940	1093-09	3	-
110477550	110477551	429-09	3	-	Setd2
39179020	39179021	833-09	3	-	Sgcz	Sgcz
32384674	32384675	756-09	3	+	Sgms1
136711323	136711324	1797-09	3	-	Sh2b2	Sh2b2
45536250	45536251	1586-09	3	-	Shb	Shb
51600046	51600047	1559-09	3	-	Shc3	Shc3
30204296	30204297	385-09	3	+	Sipa1l3
113897105	113897106	1486-09	3	-	Skint11
96999242	96999243	320-09	3	+	Slc25a36
32109513	32109514	1486-09	3	+
67716054	67716055	1486-09	3	+	Slc30a9	Slc30a9
141484829	141484830	320-09	3	-	Slco1c1
82855239	82855240	09-429	3	+
53690918	53690919	1486-09	3	+
56824520	56824521	1586-09	3	+	Smad5	Smad5
8544400	8544401	1350-09	3	-	Sntg1	Sntg1
70437362	70437363	833-09	3	+	Spag16	Spag16
81222662	81222663	385-09	3	+	St13
100558935	100558936	429-09	3	+	Stag1	Stag1
100742757	100742758	756-09	3	-	Stag1
100788370	100788371	320-09	3	+	Stag1	Stag1
19455167	19455168	650-08	3	+	Stard3nl
127098923	127098924	320-09	3	+	Stard7	Stard7
53834919	53834920	1586-09	3	-	Stk17b	Stk17b
146305664	146305665	385-09	3	-	Stk32c	Stk32c
116428652	116428653	09-429	3	+	Stk33
48160173	48160174	385-09	3	-	Stx17
44529358	44529359	09-429	3	-	Sybu	Sybu
134585977	134585978	756-09	3	-	Tacr3
36831000	36831001	1586-09	3	+
114659655	114659656	833-09	3	-	Tbc1d15	Tbc1d15
54271542	54271543	1586-09	3	-	Tbc1d19
42263933	42263934	1486-09	3	-	Tbcel	Tbcel
81646042	81646043	756-09	3	-	Tef
107570573	107570574	1586-09	3	+	Tgfbr3
71202600	71202601	320-09	3	-	Tgif1	Tgif1
114830492	114830493	429-09	3	+	Zfc3h1	Zfc3h1
60086825	60086826	833-09	3	+	Thsd4
122426225	122426226	756-09	3	-
152995324	152995325	1486-09	3	+	Tm9sf4	Tm9sf4
116104886	116104887	320-09	3	-	Tmcc1	Tmcc1
53855391	53855392	1093-09	3	+	Tmem38b	Tmem38b
79076257	79076258	320-09	3	+	Tmprss15
74151654	74151655	429-09	3	+	Tppp	Tppp
65702234	65702235	756-09	3	-	Trip4	Trip4
62378939	62378940	1586-09	3	+
34959631	34959632	429-09	3	-
113881809	113881810	320-09	3	-	Ubp1
58292002	58292003	09-429	3	+	Ubqln1
73636471	73636472	09-448	3	+	Unc13c
141401092	141401093	833-09	3	+	Unc5c	Unc5c
58641246	58641247	1586-09	3	-	Upp2
6359847	6359848	756-09	3	+	Usp6nl	Usp6nl
8691842	8691843	1351-09	3	-	Usp7	Usp7
21734854	21734855	1351-09	3	-
132696327	132696328	09-429	3	+	Wasf2	Wasf2
119808196	119808197	385-09	3	-	Wdr48
74114388	74114389	1486-09	3	+	Wdr72	Wdr72
143123308	143123309	320-09	3	+	Wipi2	Wipi2
19559013	19559014	1586-09	3	-	Wwp1	Wwp1
39435571	39435572	1586-09	3	-	Xiap
39449635	39449636	385-09	3	-	Xiap
119942777	119942778	1744-09	3	-
90156972	90156973	833-09	3	-	Xrcc4	Xrcc4
87236658	87236659	756-09	3	-	Ythdc1
16113074	16113075	1586-09	3	+	Ythdf3	Ythdf3
69733862	69733863	482-09	3	-	Zbtb14
43466164	43466165	756-09	3	+	Zbtb20	Zbtb20
24883049	24883050	833-09	3	+	Zfp180	Zfp180
106325272	106325273	1095-09	3	-	Zfp326
77362068	77362069	1744-09	3	+	Zfp385b
7077796	7077797	320-09	3	-
12068958	12068959	833-09	3	+	Zfr	Zfr
9764797	9764798	1351-09	3	-
93169549	93169550	429-09	3	+
100951582	100951583	650-08	3	-
102397614	102397615	09-429	3	+
103407285	103407286	574-09	3	+
109592484	109592485	650-08	3	-
113509198	113509199	09-429	3	-
113747683	113747684	09-1095	3	-
114102186	114102187	968-09	3	+
116981056	116981057	756-09	3	+
123179089	123179090	09-598	3	-
126671653	126671654	320-09	3	+
142111555	142111556	1486-09	3	+
144240210	144240211	1095-09	3	+
161366101	161366102	833-09	3	-
170560960	170560961	1093-09	3	-
174679965	174679966	756-09	3	-
17643270	17643271	1586-09	3	+
27176432	27176433	1586-09	3	+
30207479	30207480	09-1095	3	+
33235728	33235729	1744-09	3	+
35578368	35578369	1352-09	3	-
42061903	42061904	1486-09	3	+
42302215	42302216	1744-09	3	+
48759391	48759392	650-08	3	+
49049296	49049297	09-1095	3	+
49550210	49550211	1093-09	3	-
50358509	50358510	1797-09	3	+
51794505	51794506	756-09	3	+
56077671	56077672	1586-09	3	+
56204984	56204985	756-09	3	-
61391900	61391901	756-09	3	+
67695373	67695374	1744-09	3	+
80910370	80910371	1586-09	3	+
89920804	89920805	1586-09	3	-
96429389	96429390	09-833	3	+
124232709	124232710	482-09	3	+
22632861	22632862	320-09	3	+
29759335	29759336	429-09	3	+
30217926	30217927	385-09	3	+
50916015	50916016	320-09	3	-
64505331	64505332	650-08	3	-
65203652	65203653	1351-09	3	+
9089343	9089344	320-09	3	-
17260683	17260684	09-1095	3	-
41350243	41350244	320-09	3	-
41600562	41600563	1486-09	3	-
41626344	41626345	1586-09	3	-
55687056	55687057	385-09	3	-
63316927	63316928	320-09	3	+
74486086	74486087	1095-09	3	+
103317419	103317420	650-08	3	+
12625807	12625808	320-09	3	-
64638449	64638450	429-09	3	+
70108204	70108205	968-09	3	+
73921122	73921123	1486-09	3	+
98244969	98244970	756-09	3	+
99403322	99403323	833-09	3	+
106370705	106370706	320-09	3	+
112185210	112185211	1351-09	3	+
119123813	119123814	320-09	3	+
53668526	53668527	833-09	3	+
72220951	72220952	1586-09	3	+
102923310	102923311	574-09	3	-
110080634	110080635	756-09	3	-
110203165	110203166	385-09	3	-
114163651	114163652	833-09	3	+
29623348	29623349	09-598	3	+
46341245	46341246	385-09	3	+
72212801	72212802	429-09	3	+
73331120	73331121	1586-09	3	+
85898871	85898872	09-1095	3	+
87016496	87016497	385-09	3	-
23799278	23799279	385-09	3	+
24490858	24490859	09-429	3	-
26422548	26422549	1486-09	3	-
31915874	31915875	320-09	3	+
52449373	52449374	320-09	3	+
54593954	54593955	429-09	3	-
64492467	64492468	320-09	3	-
51360584	51360585	1586-09	3	-
64516839	64516840	756-09	3	-
76424119	76424120	1486-09	3	+
77564899	77564900	1486-09	3	-
4597993	4597994	385-09	3	+
60497848	60497849	320-09	3	-
82666486	82666487	1486-09	3	-
83161010	83161011	1586-09	3	-
11712690	11712691	756-09	3	+
29932380	29932381	756-09	3	+
30818882	30818883	1486-09	3	-
53261717	53261718	09-429	3	-
63728924	63728925	1486-09	3	-
85951795	85951796	385-09	3	-
90201660	90201661	756-09	3	-
32913520	32913521	1095-09	3	-
118005700	118005701	833-09	3	-
12554498	12554499	756-09	3	+
133962116	133962117	320-09	3	-
15823117	15823118	320-09	3	+
17165973	17165974	1486-09	3	-
26905128	26905129	1095-09	3	-
27441388	27441389	1351-09	3	+
42564770	42564771	1095-09	3	-
42905201	42905202	320-09	3	+
51420163	51420164	1093-09	3	-
56005360	56005361	429-09	3	-
8227560	8227561	833-09	3	+
91513276	91513277	756-09	3	+
102345056	102345057	385-09	3	+
110022061	110022062	1350-09	3	+
11222994	11222995	1586-09	3	+
11448146	11448147	1586-09	3	-
119159683	119159684	429-09	3	-
124740899	124740900	320-09	3	-
13270914	13270915	756-09	3	+
134380198	134380199	09-429	3	+
152716901	152716902	385-09	3	-
155242142	155242143	1586-09	3	+
18229142	18229143	1586-09	3	-
19670734	19670735	756-09	3	+
44587145	44587146	1586-09	3	+
5557626	5557627	1352-09	3	-
77344217	77344218	1586-09	3	+
80197095	80197096	320-09	3	+
87091446	87091447	1095-09	3	+
103948645	103948646	09-1095	3	-
105420072	105420073	1559-09	3	-
11800942	11800943	650-08	3	-
124060280	124060281	1586-09	3	+
18390035	18390036	1586-09	3	-
19011488	19011489	320-09	3	+
19015239	19015240	482-09	3	+
21588316	21588317	1486-09	3	-
25519928	25519929	09-429	3	+
27691124	27691125	09-1095	3	-
29924010	29924011	09-114	3	-
38421235	38421236	1744-09	3	-
39056867	39056868	1744-09	3	-
41036769	41036770	1744-09	3	+
44233188	44233189	1351-09	3	+
69259489	69259490	09-1095	3	+
69259489	69259490	1586-09	3	+
75192921	75192922	09-598	3	-
78635216	78635217	1093-09	3	+
78956915	78956916	09-833	3	-
79340119	79340120	09-598	3	+
85480690	85480691	650-08	3	-
8989227	8989228	1586-09	3	-
9136129	9136130	1559-09	3	+
101799788	101799789	1486-09	3	+
137942588	137942589	650-08	3	+
16610632	16610633	1744-09	3	+
34028727	34028728	09-429	3	-
69172136	69172137	09-1095	3	-
83103022	83103023	320-09	3	-
91534890	91534891	1486-09	3	+
91623791	91623792	833-09	3	+
96451736	96451737	320-09	3	+
98157994	98157995	574-09	3	-
107589755	107589756	1586-09	3	-
109194695	109194696	650-08	3	-
112475284	112475285	320-09	3	+
16590793	16590794	756-09	3	+
20711399	20711400	756-09	3	-
[truncated: 4,017 more rows]

## Sheet: ST9
Gene (*donor)	FWER_hit	FDR_hit	chi	pval	pval_adj	qval	expected	observed	scores	tags	tasites	insertions	tumors	ucsclink	reference	offset	score_threshold
Csf3r	TRUE	TRUE	244.902	3.35679e-55	8.03951e-51	1.60589e-51	0.0634158	4	1;1;1;25	482-09;1351-09;1093-09;09-1095	1535	5987	29	chr4:125701902-125722219	mm9	15000	0
Evi2b	TRUE	TRUE	124.424	6.80234e-29	1.62916e-24	8.56378e-26	0.0691998	3	17;2;7	385-09;320-09;833-09	1675	5987	29	chr11:79326886-79337264	mm9	15000	0
Chuk	TRUE	TRUE	112.035	3.50989e-26	8.40619e-22	4.19783e-23	0.134022	4	1;1;23;1	1351-09;1797-09;1095-09;1744-09	3244	5987	29	chr19:44147823-44181967	mm9	15000	0
Trip12	TRUE	TRUE	111.078	5.68881e-26	1.36247e-21	6.47983e-23	0.397869	7	1;1;1;1;5;2;1	650-08;09-114;833-09;1744-09;1586-09;09-1095;09-872	9630	5987	29	chr1:84717763-84835879	mm9	15000	0
Evi2a-evi2b	TRUE	TRUE	96.561	8.65382e-23	2.07259e-18	5.91427e-20	0.0880802	3	17;2;7	385-09;320-09;833-09	2132	5987	29	chr11:79326886-79344111	mm9	15000	0
Fam171b	TRUE	TRUE	79.2324	5.52178e-19	1.32247e-14	2.93513e-16	0.184881	4	2;1;1;1	756-09;650-08;09-833;1352-09	4475	5987	29	chr2:83652884-83721515	mm9	15000	0
Rasef	TRUE	TRUE	59.8372	1.03035e-14	2.4677e-10	3.79171e-12	0.238426	4	1;1;1;1	1093-09;09-429;650-08;1744-09	5771	5987	29	chr4:73360482-73436506	mm9	15000	0
Gtf3c3	TRUE	TRUE	59.2958	1.35663e-14	3.24912e-10	4.91674e-12	0.138732	3	1;1;2	1586-09;09-1095;574-09	3358	5987	29	chr1:54454424-54495815	mm9	15000	0
Wac	TRUE	TRUE	59.1713	1.44527e-14	3.46143e-10	5.15984e-12	0.240822	4	1;1;1;2	756-09;1586-09;1350-09;968-09	5829	5987	29	chr18:7868829-7929026	mm9	15000	0
Pten	TRUE	TRUE	56.5513	5.47504e-14	1.31127e-09	1.8709e-11	0.250738	4	8;1;8;1	1486-09;09-598;09-1095;09-429	6069	5987	29	chr19:32832066-32900650	mm9	15000	0
Rfwd2	TRUE	TRUE	50.2705	1.33945e-12	3.20798e-08	3.8602e-10	0.422908	5	1;3;9;5;14	482-09;320-09;1586-09;650-08;09-429	10236	5987	29	chr1:161162456-161277711	mm9	15000	0
Actr2	TRUE	TRUE	49.5092	1.9744e-12	4.72869e-08	5.36678e-10	0.163438	3	4;1;1	833-09;650-08;1350-09	3956	5987	29	chr11:19962306-20012954	mm9	15000	0
Rngtt	TRUE	TRUE	49.0088	2.54811e-12	6.10273e-08	6.69789e-10	0.606286	6	1;2;3;1;1;1	482-09;09-833;1093-09;968-09;1586-09;09-1095	14674	5987	29	chr4:33397285-33589585	mm9	15000	0
Csnk2a1	TRUE	TRUE	48.2475	3.75674e-12	8.99739e-08	9.5597e-10	0.16728	3	3;10;1	1486-09;756-09;1586-09	4049	5987	29	chr2:152052575-152107587	mm9	15000	0
Cdk5rap2	TRUE	TRUE	47.5946	5.24139e-12	1.25531e-07	1.30598e-09	0.443071	5	1;1;1;1;2	1351-09;09-833;429-09;650-08;1744-09	10724	5987	29	chr4:69884057-70071401	mm9	15000	0
Ehd4	TRUE	TRUE	43.9785	3.32005e-11	7.95151e-07	7.09067e-09	0.181741	3	2;3;1	1486-09;756-09;320-09	4399	5987	29	chr2:119915222-119980311	mm9	15000	0
Mbnl1	TRUE	TRUE	40.0636	2.45832e-10	5.88768e-06	4.52331e-08	0.511827	5	1;5;1;1;2	756-09;320-09;429-09;09-1095;1586-09	12388	5987	29	chr3:60276751-60433670	mm9	15000	0
Cps1	TRUE	TRUE	37.6325	8.54116e-10	2.04561e-05	1.34411e-07	0.357047	4	1;10;3;2	482-09;1486-09;1586-09;1744-09	8642	5987	29	chr1:67169600-67277841	mm9	15000	0
Ddhd1	TRUE	TRUE	37.3795	9.72403e-10	2.3289e-05	1.52025e-07	0.209794	3	8;1;1	1486-09;385-09;09-1095	5078	5987	29	chr14:46212845-46277818	mm9	15000	0
Erg	TRUE	TRUE	35.5172	2.52813e-09	6.05486e-05	3.62113e-07	0.374855	4	1;5;4;3	482-09;1093-09;09-1095;09-429	9073	5987	29	chr16:95581810-95751972	mm9	15000	0
Atad2b	TRUE	TRUE	32.3655	1.27734e-08	0.000305923	1.47604e-06	0.404976	4	2;1;1;1	1486-09;09-598;09-232;1093-09	9802	5987	29	chr12:4924158-5054216	mm9	15000	0
Mga	TRUE	TRUE	30.2496	3.79865e-08	0.000909778	3.86655e-06	0.251853	3	5;4;1	1486-09;320-09;429-09	6096	5987	29	chr2:119722963-119795317	mm9	15000	0
Syt14	TRUE	TRUE	30.148	4.00292e-08	0.000958699	3.98958e-06	0.429271	4	1;1;1;5	482-09;833-09;09-833;650-08	10390	5987	29	chr1:194723500-194861892	mm9	15000	0
Zfp292	TRUE	TRUE	29.7158	5.00264e-08	0.00119813	4.92441e-06	0.255696	3	17;6;2	429-09;1586-09;09-872	6189	5987	29	chr4:34750358-34830197	mm9	15000	0
Plekhm3	TRUE	TRUE	29.406	5.86965e-08	0.00140578	5.52764e-06	0.438072	4	1;2;5;1	1351-09;1586-09;1352-09;1744-09	10603	5987	29	chr1:64835694-65003398	mm9	15000	0
Phf20	TRUE	TRUE	28.2898	1.04443e-07	0.00250141	8.98662e-06	0.266562	3	2;5;1	320-09;429-09;833-09	6452	5987	29	chr2:156022382-156135689	mm9	15000	0
Elavl2	TRUE	TRUE	27.619	1.47717e-07	0.00353782	1.19776e-05	0.460839	4	3;1;4;1	1351-09;650-08;574-09;09-429	11154	5987	29	chr4:90917456-91066675	mm9	15000	0
Airn	TRUE	TRUE	27.3992	1.655e-07	0.00396372	1.324e-05	0.273834	3	3;1;6	756-09;1093-09;429-09	6628	5987	29	chr17:12934176-13052750	mm9	15000	0
Arfip1	TRUE	TRUE	27.0774	1.95473e-07	0.00468158	1.5083e-05	0.276561	3	5;2;1	320-09;1586-09;650-08	6694	5987	29	chr3:84299985-84386547	mm9	15000	0
Vav2	TRUE	TRUE	26.7855	2.27331e-07	0.00544458	1.72081e-05	0.279081	3	2;1;7	1486-09;756-09;429-09	6755	5987	29	chr2:27119154-27282345	mm9	15000	0
Tnr	TRUE	TRUE	26.3267	2.88271e-07	0.00690409	2.10227e-05	0.98787	6	1;1;2;2;12;2	482-09;650-08;09-429;1744-09;574-09;09-872	23908	5987	29	chr1:161453899-161855053	mm9	15000	0
Gab1	TRUE	TRUE	25.7314	3.92388e-07	0.00939769	2.72035e-05	0.288584	3	2;1;1	833-09;650-08;09-1095	6985	5987	29	chr8:83288332-83404378	mm9	15000	0
Nf1	TRUE	TRUE	25.5452	4.32144e-07	0.0103498	2.94498e-05	0.731657	5	17;3;2;14;7	385-09;1486-09;320-09;833-09;968-09	17708	5987	29	chr11:79153393-79395111	mm9	15000	0
Ago3	TRUE	TRUE	24.8491	6.19971e-07	0.0148483	4.00803e-05	0.297054	3	1;6;1	09-598;09-1095;574-09	7190	5987	29	chr4:126017921-126106786	mm9	15000	0
Nbeal1	TRUE	TRUE	24.1671	8.83265e-07	0.0211542	5.34879e-05	0.512364	4	71;1;2;2	385-09;320-09;1095-09;482-09	12401	5987	29	chr1:60237442-60391549	mm9	15000	0
Picalm	TRUE	TRUE	24.155	8.88828e-07	0.0212874	5.36888e-05	0.304078	3	2;2;1	1486-09;385-09;1559-09	7360	5987	29	chr7:97278741-97357957	mm9	15000	0
AB041803	TRUE	TRUE	23.9138	1.00746e-06	0.0241287	5.93559e-05	0.306598	3	5;3;2	1486-09;756-09;1351-09	7421	5987	29	chr6:31043562-31168474	mm9	15000	0
Rasa1	TRUE	TRUE	23.4128	1.30704e-06	0.0313036	7.35633e-05	0.311969	3	1;46;1	833-09;1095-09;968-09	7551	5987	29	chr13:85354303-85429091	mm9	15000	0
Nfia	TRUE	TRUE	23.0646	1.56652e-06	0.0375182	8.69401e-05	1.41964	7	1;2;3;6;7;1;1	1486-09;320-09;09-598;1586-09;09-1095;09-114;1559-09	34355	5987	29	chr4:97248633-97785567	mm9	15000	0
Vcl	FALSE	TRUE	22.5109	2.08951e-06	0.0500439	0.000112824	0.322133	3	3;1;10	1351-09;1093-09;1095-09	7797	5987	29	chr14:21748654-21852895	mm9	15000	0
Rapgef6	FALSE	TRUE	21.7459	3.11261e-06	0.0745469	0.000160115	0.556081	4	1;13;29;3	1486-09;385-09;429-09;1352-09	13459	5987	29	chr11:54336346-54512788	mm9	15000	0
Eps15	FALSE	TRUE	21.4596	3.61357e-06	0.0865449	0.000183517	0.334859	3	4;1;2	756-09;1586-09;833-09	8105	5987	29	chr4:108952879-109060421	mm9	15000	0
Ankhd1	FALSE	TRUE	20.0965	7.36326e-06	0.17635	0.000332319	0.352956	3	5;9;2	756-09;1486-09;1586-09	8543	5987	29	chr18:36720256-36818562	mm9	15000	0
Ccny	FALSE	TRUE	18.9266	1.35849e-05	0.325357	0.000571089	0.370144	3	2;1;1	756-09;833-09;1744-09	8959	5987	29	chr18:9314041-9450148	mm9	15000	0
Rps6ka3	FALSE	TRUE	18.3181	1.86921e-05	0.447675	0.00075782	0.379771	3	6;8;9	1486-09;756-09;1095-09	9192	5987	29	chrX:155694051-155801417	mm9	15000	0
Cdk19	FALSE	TRUE	17.9255	2.29725e-05	0.550192	0.000905276	0.386258	3	2;2;1	385-09;650-08;09-448	9349	5987	29	chr10:40069113-40203624	mm9	15000	0
Gigyf2	FALSE	TRUE	17.874	2.36028e-05	0.565286	0.000925537	0.387126	3	3;4;1	320-09;09-833;1744-09	9370	5987	29	chr1:89223572-89347385	mm9	15000	0
Cep350	FALSE	TRUE	17.2876	3.2128e-05	0.769465	0.00120455	0.39729	3	1;1;2	320-09;09-833;429-09	9616	5987	29	chr1:157692093-157820385	mm9	15000	0
AI314180	FALSE	TRUE	17.0057	3.72686e-05	0.892583	0.0013736	0.402373	3	1;2;1	1586-09;833-09;574-09	9739	5987	29	chr4:58812902-58925597	mm9	15000	0
Pde4b	FALSE	TRUE	16.8531	4.03882e-05	0.967296	0.00147946	0.988531	5	1;1;10;1;2	1351-09;1586-09;650-08;574-09;320-09	23924	5987	29	chr4:101927346-102279867	mm9	15000	0
Rock1	FALSE	TRUE	16.4157	5.08609e-05	1	0.00181852	0.413446	3	2;4;1	1486-09;1586-09;968-09	10007	5987	29	chr18:10064398-10181790	mm9	15000	0
Eya1	FALSE	TRUE	16.1996	5.70068e-05	1	0.00201121	0.41766	3	1;3;8	1486-09;320-09;09-1095	10109	5987	29	chr1:14159038-14300280	mm9	15000	0
Ankrd44	FALSE	TRUE	16.093	6.03058e-05	1	0.00210894	0.695293	4	1;9;1;7	09-598;833-09;574-09;1744-09	16828	5987	29	chr1:54702183-54983231	mm9	15000	0
Smarca2	FALSE	TRUE	15.7381	7.27453e-05	1	0.00246818	0.426957	3	83;4;7	756-09;385-09;429-09	10334	5987	29	chr19:26679649-26852811	mm9	15000	0
Ahcyl2	FALSE	TRUE	15.6482	7.62849e-05	1	0.00257005	0.428816	3	5;1;1	320-09;1352-09;968-09	10379	5987	29	chr6:29718442-29862310	mm9	15000	0
Myo1b	FALSE	TRUE	15.5021	8.24115e-05	1	0.00275704	0.431874	3	5;1;1	1797-09;09-1095;09-429	10453	5987	29	chr1:51806609-51972818	mm9	15000	0
Kdm6a	FALSE	TRUE	14.6376	0.000130287	1	0.00410601	0.450922	3	5;2;1	1486-09;320-09;833-09	10914	5987	29	chrX:17739792-17856484	mm9	15000	0
Ldlrad4	FALSE	TRUE	14.4686	0.000142519	1	0.00445629	0.749591	4	1;10;1;3	756-09;1095-09;650-08;1744-09	18142	5987	29	chr18:68092910-68415203	mm9	15000	0
Ccdc141	FALSE	TRUE	14.2784	0.000157666	1	0.00488519	0.459351	3	10;31;1	385-09;320-09;968-09	11118	5987	29	chr2:76847962-77008692	mm9	15000	0
R3hdm1	FALSE	TRUE	13.8643	0.000196496	1	0.00591962	0.469474	3	4;4;1	1486-09;09-1095;574-09	11363	5987	29	chr1:129999882-130134312	mm9	15000	0
Mllt10	FALSE	TRUE	13.8626	0.000196669	1	0.00591962	0.469516	3	1;1;1	482-09;574-09;1744-09	11364	5987	29	chr2:17976863-18134017	mm9	15000	0
Angpt1	FALSE	TRUE	13.7438	0.000209516	1	0.00622561	0.77674	4	8;8;7;1	385-09;429-09;1586-09;09-429	18799	5987	29	chr15:42256212-42508523	mm9	15000	0
Dock8	FALSE	TRUE	13.5683	0.000230036	1	0.00674321	0.476994	3	2;3;2	1486-09;833-09;1095-09	11545	5987	29	chr19:25074018-25276922	mm9	15000	0
Pam	FALSE	TRUE	13.3796	0.000254377	1	0.0073754	0.791162	4	3;1;14;1	1486-09;833-09;1586-09;09-1095	19148	5987	29	chr1:99717670-99992209	mm9	15000	0
Tmeff2	FALSE	TRUE	12.8967	0.000329168	1	0.00915548	0.811163	4	2;1;5;4	385-09;09-114;1352-09;1744-09	19632	5987	29	chr1:50984366-51244114	mm9	15000	0
Zfand3	FALSE	TRUE	12.6107	0.00038355	1	0.0104374	0.503108	3	2;1;1	1486-09;756-09;833-09	12177	5987	29	chr17:30142031-30346965	mm9	15000	0
Astn2	FALSE	TRUE	12.0381	0.00052124	1	0.0137314	2.63233	8	1;1;5;1;2;1;1;1	482-09;1093-09;650-08;1350-09;09-1095;09-448;09-114;1559-09	63689	5987	29	chr4:65041836-66065517	mm9	15000	0
Pdlim5	FALSE	TRUE	11.9726	0.000539879	1	0.0141877	0.522198	3	1;2;1	1586-09;833-09;09-872	12639	5987	29	chr3:141902548-142058660	mm9	15000	0
Cblb	FALSE	TRUE	11.9554	0.000544904	1	0.0142761	0.522735	3	1;3;1	385-09;756-09;320-09	12652	5987	29	chr16:52031661-52208159	mm9	15000	0
Focad	FALSE	TRUE	11.9014	0.000560911	1	0.0145679	0.855876	4	1;1;26;1	756-09;1351-09;1093-09;1744-09	20714	5987	29	chr4:87740533-88056915	mm9	15000	0
Rabgap1l	FALSE	TRUE	11.7153	0.000619893	1	0.0159268	1.68637	6	1;1;1;1;4;1	385-09;1093-09;650-08;09-429;1351-09;09-448	40808	5987	29	chr1:162149304-162723069	mm9	15000	0
Gtdc1	FALSE	TRUE	11.134	0.000847607	1	0.0210756	0.894019	4	1;5;1;2	756-09;1093-09;1586-09;09-232	21637	5987	29	chr2:44419931-44717142	mm9	15000	0
Zcchc7	FALSE	TRUE	9.84777	0.00170037	1	0.0378001	0.598145	3	9;5;1	1486-09;756-09;968-09	14477	5987	29	chr4:44769430-44945086	mm9	15000	0
Rcan2	FALSE	TRUE	9.71244	0.00183025	1	0.0401648	0.603765	3	9;1;1	1486-09;09-598;1744-09	14613	5987	29	chr17:43938799-44176465	mm9	15000	0
Glra3	FALSE	TRUE	9.7016	0.00184107	1	0.0403529	0.60422	3	1;1;1	1559-09;650-08;09-429	14624	5987	29	chr8:58419621-58604149	mm9	15000	0
Phlpp1	FALSE	TRUE	9.46273	0.00209688	1	0.0452276	0.614426	3	1;1;2	1486-09;1586-09;650-08	14871	5987	29	chr1:108068445-108290822	mm9	15000	0
Ptprd	FALSE	TRUE	9.44036	0.00212262	1	0.0457416	6.94033	14	3;18;1;2;1;5;2;10;1;2;1;3;18;1	1486-09;320-09;09-833;429-09;833-09;09-598;650-08;1744-09;1351-09;1352-09;09-1095;09-429;1095-09;574-09	167800	5987	29	chr4:75587140-77857799	mm9	15000	0
Trio	FALSE	TRUE	9.36835	0.00220764	1	0.0472332	0.618558	3	26;8;1	1486-09;1586-09;1744-09	14971	5987	29	chr15:27660403-27955603	mm9	15000	0
Dopey1*	TRUE	TRUE	323.668	2.30091e-72	5.51068e-68	2.75189e-68	0.294038	10	3;5;1;4;2;3;1;16;1;2	1486-09;320-09;09-598;650-08;09-429;1586-09;09-1095;756-09;1093-09;482-09	7117	5987	29	chr9:86360760-86449413	mm9	15000	0
Rdx*	TRUE	TRUE	218.53	1.89251e-49	4.53257e-45	6.46699e-46	0.157075	6	1;2;1;1;1;2	1486-09;09-114;1744-09;1351-09;1586-09;429-09	3802	5987	29	chr9:51855254-51896843	mm9	15000	0
Rasgrf1*	TRUE	TRUE	216.941	4.2039e-49	1.00683e-44	1.25697e-45	0.277552	8	224;747;2;1;301;1;515;493	320-09;385-09;09-429;1351-09;1586-09;09-1095;429-09;968-09	6718	5987	29	chr9:89804612-89921817	mm9	15000	0
[truncated: 29 more rows]

[truncated: 15 more sheets: ST10, ST11, ST12, ST13, ST14, ST15, ST16, ST17, ST18, ST19, ST20, ST21, ST22, ST23, ST24]
